# Supplementary material for: Development of a multiple reaction monitoring (MRM)-based LC-MS/MS method for the quantification of post-translational modifications on histone H3 variants in Arabidopsis thaliana
Source: Royal Society of Chemistry journal article supplement (doi:10.1039/d4an01563k), 2025-01-01
Supplement: d4an01563k1.zip [file d4an01563k1.zip]

## Sheet: a1.bed
chr	START	END	GENE	NA	strand	H3K36me3 signal in WT	H3K36me3 signal in Sdg8 KO
chr1	2107398	2107468	AT1G06860_	.	-	10.21	0
chr3	22881807	22881878	AT3G61825_	.	+	8.21	0
chr5	26097530	26097567	AT5G65305_	.	-	8.12	0
chr1	22040612	22040683	AT1G59880_	.	-	7.5	0
chr4	18293780	18293851	AT4G39345_	.	+	6.5	0
chr2	10059446	10059517	AT2G23650_	.	-	3.45	0
chr4	11774461	11774496	AT4G22265_	.	-	1.75	0
chr5	14366414	14366770	AT5G36500_	.	-	0.7	0
chr2	18309977	18310058	AT2G44320_	.	-	28.82	0.53
chr1	29039922	29049302	AT1G77300_ASHH2,CCR1,EFS,LAZ2,SDG8	.	-	58.13	1.58
chr3	14199753	14199916	AT3G41979_	.	+	16.8	0.46
chr2	3472305	3473692	AT2G07734_	.	-	0.15	0
chr5	4222003	4222085	AT5G13225_	.	-	77.85	4.93
chr2	12471773	12471844	AT2G29030_	.	-	15.43	1.11
chr1	27984604	27984713	AT1G74453_	.	-	64.57	5.71
chr3	19073450	19073541	AT3G51375_MIR171A	.	+	15.54	1.45
chr2	7039094	7039165	AT2G16240_	.	+	8.93	0.84
chr4	13882917	13882988	AT4G27875_	.	-	3.39	0.33
chr2	706796	706868	AT2G02600_	.	+	16.12	1.78
chr4	8713226	8713353	AT4G15258_SNOR37-2	.	-	45.2	5.39
chr3	2586032	2586206	AT3G08520_	.	+	131.75	16.12
chr2	8931708	8931782	AT2G20722_	.	-	80.46	9.91
chr4	1445879	1445954	AT4G03295_	.	-	65.15	8.13
chr3	18917433	18917506	AT3G50895_	.	+	4.66	0.58
chr5	3456647	3456732	AT5G10945_MIR156D	.	-	106.41	13.5
chr2	15029832	15029911	AT2G35747_	.	-	100.81	13.63
chr1	9076447	9076572	AT1G26235_	.	-	115.36	16.3
chr2	8931565	8931655	AT2G20721_	.	-	61.52	8.84
chr3	17445810	17445886	AT3G47347_	.	+	105.03	15.74
chr5	21295736	21295809	AT5G52471_U60.1F	.	+	34.91	5.38
chr2	14894380	14894455	AT2G35382_	.	-	67.18	11.05
chr3	4411168	4411253	AT3G13525_	.	+	48.37	8.08
chr4	18304891	18305010	AT4G39361_	.	+	121.78	20.63
chr2	9926378	9926518	AT2G23321_	.	+	17.02	3.03
chr3	10328510	10328601	AT3G27865_	.	+	79.14	14.19
chr3	17445382	17445459	AT3G47342_	.	+	115.66	21.03
chr4	17980417	17980557	AT4G38405_	.	-	9.95	1.81
chr2	10739855	10740552	AT2G25210_	.	+	114.67	21.06
chr5	998942	999014	AT5G03775_	.	+	14.3	2.62
chr2	8931849	8931922	AT2G20723_	.	-	83.49	15.34
chr5	26568397	26568470	AT5G66568_	.	+	5.43	1
chr1	19981628	19981813	AT1G53542_	.	+	51.15	9.53
chr1	875518	875604	AT1G03506_	.	-	47.71	8.98
chr3	2918413	2918486	AT3G09505_	.	-	22.86	4.31
chr4	9108308	9108381	AT4G16105_	.	+	16.03	3.11
chr2	16007012	16007690	AT2G38210_PDX1L4	.	+	7.33	1.42
chr2	15029829	15030290	AT2G35750_	.	-	111.88	21.87
chr5	8105233	8105325	AT5G23989_	.	+	14.7	2.91
chr4	808270	808342	AT4G01865_	.	-	7.38	1.46
chr1	17825730	17825819	AT1G48267_MIR161	.	+	97.62	19.42
chr4	6819292	6819328	AT4G11177_	.	+	14.56	2.92
chr3	10752431	10752503	AT3G28685_	.	+	18.04	3.62
chr2	9841882	9842025	AT2G23118_	.	-	6.18	1.24
chr3	4012608	4013583	AT3G12630_SAP5	.	+	85.79	17.9
chr1	937207	937287	AT1G03743_	.	-	53.93	11.3
chr1	7823149	7823971	AT1G22160_	.	+	111.97	23.48
chr3	18893404	18893484	AT3G50825_	.	-	64.33	13.53
chr1	4899145	4899979	AT1G14345_	.	+	126.52	26.75
chr1	18138268	18139005	AT1G49032_	.	+	67.78	14.35
chr3	3481052	3481448	AT3G11120_	.	+	91.95	19.53
chr1	18504802	18505597	AT1G49975_	.	+	65.25	13.92
chr1	9481532	9482912	AT1G27290_	.	+	79.37	17.01
chr3	4136961	4137674	AT3G12965_	.	-	71.08	15.3
chr2	7200807	7201574	AT2G16600_AtCYP19-1,CYP19,ROC3	.	+	121.57	26.24
chr5	19623516	19624232	AT5G48412_	.	-	48.55	10.49
chr2	11159702	11159803	AT2G26211_MIR825A	.	+	48.66	10.52
chr3	7682362	7682452	AT3G21805_	.	+	87.65	18.96
chr3	17445963	17446047	AT3G47348_	.	+	58.38	12.79
chr2	16792317	16792531	AT2G40205_	.	-	104.04	22.84
chr3	20604616	20606380	AT3G55560_AGF2,AHL15	.	-	94.67	21.03
chr1	25757404	25758232	AT1G68590_PSRP3/1	.	-	109.31	24.45
chr2	14894718	14894796	AT2G35387_	.	-	98.51	22.04
chr1	16871696	16873383	AT1G44575_CP22,NPQ4,PSBS	.	+	102.7	23.04
chr2	1933272	1934212	AT2G05310_	.	-	104.77	23.56
chr2	19232377	19232523	AT2G46787_	.	+	8.65	1.94
chr1	10300878	10301302	AT1G29418_	.	+	43.93	9.9
chr1	18549204	18550042	AT1G50055_TAS1B	.	-	53.4	12.09
chr3	19412120	19412918	AT3G52360_	.	+	59.62	13.59
chr3	2921804	2923258	AT3G09510_	.	+	0.69	0.15
chr4	18305256	18305375	AT4G39363_	.	+	108.06	24.79
chr1	17569256	17570159	AT1G47750_PEX11A	.	-	102.95	23.77
chr1	7038688	7040159	AT1G20330_CVP1,FRL1,SMT2	.	-	111.11	25.72
chr4	15120650	15120722	AT4G31075_	.	+	26.5	6.13
chr5	24172082	24172975	AT5G60030_	.	-	126.79	29.52
chr3	8979504	8979605	AT3G24615_	.	-	65.92	15.47
chr2	19616975	19617681	AT2G47930_AGP26,ATAGP26	.	-	73.81	17.36
chr3	6023866	6024698	AT3G17609_HYH	.	+	70.2	16.53
chr5	3455607	3457306	AT5G10946_	.	-	68.05	16.09
chr2	11721539	11722468	AT2G27400_TAS1A	.	-	68.98	16.39
chr2	8122119	8123076	AT2G18735_	.	+	41.27	9.9
chr3	21559060	21559139	AT3G58193_	.	+	71.32	17.13
chr1	19454836	19455668	AT1G52230_PSAH-2,PSAH2,PSI-H	.	+	75.27	18.08
chr4	10780956	10782365	AT4G19865_	.	-	75.71	18.19
chr3	5468509	5469481	AT3G16140_PSAH-1	.	-	106.35	25.63
chr3	7445757	7447351	AT3G21220_ATMAP2K_ALPHA,ATMEK5,ATMKK5,MAP2K_A,MEK5,MKK5	.	+	107.38	25.99
chr4	14202758	14203961	AT4G28750_PSAE-1	.	-	84.9	20.55
chr3	10350656	10352033	AT3G27890_NQR	.	-	77.72	18.83
chr2	13019028	13020194	AT2G30570_PSBW	.	-	87.48	21.21
chr5	18698662	18698733	AT5G46105_	.	-	86.98	21.09
chr5	7842971	7844275	AT5G23280_	.	+	106.9	25.93
chr1	29345838	29347107	AT1G78040_	.	+	97	23.61
chr2	296510	298101	AT2G01670_atnudt17,NUDT17	.	-	59.82	14.58
chr1	2564572	2565121	AT1G08180_	.	-	62.41	15.22
chr4	7232799	7232871	AT4G12065_	.	-	71.74	17.53
chr1	25236811	25238216	AT1G67360_	.	-	98.02	24
chr2	17923238	17923316	AT2G43138_	.	+	78.96	19.47
chr1	6709773	6710670	AT1G19394_	.	+	96.06	23.78
chr3	5831194	5832419	AT3G17100_AIF3	.	+	93.86	23.24
chr3	17134091	17135587	AT3G46540_	.	-	72.24	17.89
chr5	8073224	8074170	AT5G23920_	.	-	89.23	22.21
chr5	23833728	23834511	AT5G59030_COPT1	.	-	115.15	28.67
chr2	15056753	15056995	AT2G35850_	.	+	38.53	9.59
chr5	26416661	26416807	AT5G66053_	.	-	49.21	12.26
chr2	6154493	6155004	AT2G14460_	.	-	56.17	14.01
chr2	14894549	14894627	AT2G35384_	.	-	91.38	22.8
chr3	22585655	22590853	AT3G61030_	.	+	0.31	0.07
chr3	21559244	21559320	AT3G58196_	.	+	70.88	17.73
chr2	2184567	2184645	AT2G05765_	.	-	69.93	17.5
chr4	15074945	15075024	AT4G30972_MIR156B	.	+	100.13	25.12
chr4	7142303	7142434	AT4G11876_	.	+	10.27	2.57
chr2	17470866	17472936	AT2G41870_	.	-	68.33	17.17
chr2	12326978	12327678	AT2G28720_	.	+	84.79	21.31
chr2	3781328	3782049	AT2G09990_	.	+	80.44	20.25
chr2	7693596	7694746	AT2G17710_	.	+	63.03	15.89
chr1	24096435	24097650	AT1G64850_	.	-	85.77	21.63
chr5	3472405	3473466	AT5G10980_H3.3	.	-	81.03	20.45
chr2	10566898	10568145	AT2G24790_ATCOL3,BBX4,COL3	.	+	141.14	35.64
chr2	19446854	19447438	AT2G47400_CP12,CP12-1	.	+	124.22	31.44
chr3	19323332	19323827	AT3G52105_	.	+	70	17.74
chr4	8984858	8985405	AT4G15800_RALFL33	.	+	86.23	21.89
chr5	23672695	23673287	AT5G58570_	.	-	61.92	15.73
chr2	17923081	17923157	AT2G43137_	.	+	120.28	30.57
chr2	6950041	6951192	AT2G15970_ATCOR413-PM1,ATCYP19,COR413-PM1,FL3-5A3,WCOR413,WCOR413-LIKE	.	+	79.13	20.15
chr5	7740610	7740697	AT5G23065_MIR162B	.	-	59.77	15.22
chr2	18973307	18974133	AT2G46192_	.	+	88.53	22.58
chr4	15191325	15192596	AT4G31310_	.	+	72.23	18.45
chr1	7337728	7339452	AT1G21000_	.	+	78.57	20.09
chr1	12582122	12582721	AT1G34418_	.	+	59.83	15.3
chr5	15827026	15827097	AT5G39535_	.	-	58.78	15.04
chr3	19546374	19546964	AT3G52740_	.	-	93.32	23.93
chr1	19688957	19690542	AT1G52880_ANAC018,ATNAM,NAM,NARS2	.	-	57.45	14.74
chr3	22662953	22664493	AT3G61220_SDR1	.	+	88.8	22.85
chr4	7858000	7859691	AT4G13505_	.	-	118.15	30.41
chr3	22470241	22470313	AT3G60805_	.	-	6.93	1.78
chr4	7858183	7859918	AT4G13510_AMT1;1,ATAMT1,ATAMT1;1	.	+	116.09	30.01
chr1	27744672	27745377	AT1G73790_AtGIP2,GIP1b,GIP2	.	+	62.04	16.05
chr5	19116788	19118046	AT5G47060_	.	+	62.88	16.31
chr2	19472681	19474314	AT2G47450_CAO,CPSRP43	.	+	112.28	29.14
chr3	8236161	8236246	AT3G23125_MIR173	.	+	46.9	12.19
chr1	29422452	29422574	AT1G78206_MIR775A	.	+	66.39	17.3
chr5	18978977	18980057	AT5G46780_	.	+	49.58	12.94
chr5	2167468	2169391	AT5G06980_LNK4	.	+	89.44	23.38
chr5	21673525	21675733	AT5G53420_	.	+	71.94	18.81
chr4	10578652	10578755	AT4G19395_MIR168,MIR168A	.	+	92.44	24.21
chr2	13436557	13438011	AT2G31560_	.	+	80.24	21.02
chr1	875358	875471	AT1G03502_	.	-	15.8	4.15
chr1	21441505	21442920	AT1G57990_ATPUP18,PUP18	.	-	73.46	19.33
chr2	10042199	10043673	AT2G23600_ACL,ATME8,ATMES2,ME8,MES2	.	-	74.47	19.6
chr2	18309212	18309826	AT2G44310_	.	+	107.43	28.29
chr3	21344800	21346057	AT3G57640_	.	-	51.28	13.53
chr4	16233209	16234196	AT4G33865_	.	-	76.03	20.08
chr3	17136456	17137874	AT3G46550_FLA4,SOS5	.	-	77.8	20.55
chr2	385199	387344	AT2G01850_ATXTH27,EXGT-A3,XTH27	.	+	62.14	16.43
chr5	17891222	17892978	AT5G44410_	.	-	66.16	17.52
chr5	693079	694515	AT5G02960_	.	-	85.1	22.58
chr1	22095360	22096577	AT1G60010_	.	-	64.83	17.21
chr5	575382	576606	AT5G02560_HTA12	.	+	77.11	20.5
chr4	12724743	12725637	AT4G24660_ATHB22,HB22,MEE68,ZHD2	.	-	95.46	25.41
chr4	6100561	6100698	AT4G09649_	.	-	39.56	10.54
chr1	17252952	17253903	AT1G46554_	.	+	62.55	16.68
chr1	29338693	29339755	AT1G78020_	.	+	92.55	24.7
chr5	12235759	12235890	AT5G32597_	.	-	13.5	3.6
chr1	28146059	28147378	AT1G74940_	.	+	69.79	18.65
chr1	7042429	7043363	AT1G20340_DRT112,PETE2	.	-	129.65	34.69
chr5	419091	419773	AT5G02120_OHP,PDE335	.	+	86.82	23.23
chr3	20790570	20791085	AT3G56020_	.	-	105.79	28.32
chr4	18559103	18559844	AT4G40042_	.	+	79.42	21.26
chr2	1333262	1334566	AT2G04039_	.	+	73.9	19.79
chr1	27713234	27713415	AT1G73687_MIR159,MIR159A	.	-	69.34	18.57
chr2	10427856	10429222	AT2G24550_	.	-	57.89	15.52
chr2	13306593	13307475	AT2G31230_ATERF15,ERF15	.	-	55.79	14.96
chr3	2299774	2300267	AT3G07230_	.	+	107.28	28.82
chr5	7222226	7223621	AT5G21430_CRRL,NdhU	.	+	69.91	18.79
chr2	15090867	15091764	AT2G35945_	.	+	119.05	32.02
chr2	1446864	1449100	AT2G04230_	.	-	63.09	17.04
chr1	9886077	9887478	AT1G28280_	.	-	77.14	20.84
chr3	2510783	2512394	AT3G07870_	.	+	104.84	28.33
chr5	24954506	24955385	AT5G62140_	.	-	52.56	14.22
chr5	22338672	22338744	AT5G55045_	.	-	11.02	2.98
chr1	5248664	5249474	AT1G15250_	.	-	76.52	20.76
chr5	23940782	23942213	AT5G59350_	.	+	74.71	20.27
chr1	180059	182358	AT1G01490_	.	-	66	17.93
chr2	11270089	11270953	AT2G26500_	.	+	106.03	28.81
chr1	25693449	25695476	AT1G68490_	.	+	73.83	20.08
chr2	9126263	9127843	AT2G21320_BBX18	.	+	107.51	29.27
chr4	7563157	7563847	AT4G12917_	.	-	66.19	18.05
chr5	8589234	8591236	AT5G24930_ATCOL4,BBX5,COL4	.	+	113.23	30.9
chr1	17847356	17848564	AT1G48300_DGAT3	.	+	112.2	30.65
chr1	21537770	21539914	AT1G58180_ATBCA6,BCA6	.	-	63	17.22
chr4	7653647	7654925	AT4G13160_	.	+	78.63	21.5
chr1	27110865	27111932	AT1G72030_	.	+	75.56	20.67
chr5	22246592	22248332	AT5G54770_THI1,THI4,TZ	.	+	119.62	32.78
chr4	14955373	14956171	AT4G30660_	.	+	56.51	15.49
chr4	7310416	7312577	AT4G12310_CYP706A5	.	-	68.03	18.65
chr4	15469895	15470559	AT4G31985_	.	+	83.93	23.03
chr1	24215644	24217328	AT1G65190_	.	-	65.98	18.12
chr4	18557187	18558743	AT4G40040_H3.3	.	-	86.77	23.84
chr1	11738118	11739326	AT1G32460_	.	+	49.97	13.73
chr5	14198587	14199243	AT5G36120_atylmg3,CCB3,YLMG3	.	-	105.8	29.08
chr1	190596	192139	AT1G01520_ASG4	.	+	86.47	23.77
chr5	8558191	8559406	AT5G24890_	.	-	80.86	22.25
chr3	17019911	17020428	AT3G46320_	.	-	40.5	11.16
chr1	24961634	24963946	AT1G66910_	.	-	65.74	18.13
chr1	11785936	11786037	AT1G32582_MIR400	.	+	123.07	33.97
chr5	26416126	26416924	AT5G66052_	.	+	65.86	18.18
chr1	24686256	24687332	AT1G66240_ATATX1,ATX1	.	-	76.6	21.17
chr2	18795926	18797089	AT2G45630_	.	+	69.53	19.22
chr1	24957558	24958114	AT1G66890_	.	+	54.98	15.2
chr1	10044337	10046442	AT1G28580_	.	-	63.37	17.53
chr4	13675638	13676910	AT4G27310_BBX28	.	+	65.38	18.09
chr1	2092946	2096232	AT1G06820_CCR2,CRTISO	.	-	54.75	15.15
chr4	16708552	16710289	AT4G35100_PIP2;7,PIP3,PIP3A,SIMIP	.	+	79.41	22.05
chr3	19429735	19430063	AT3G52420_ATOEP7,OEP7	.	+	71.11	19.76
chr4	8713689	8715339	AT4G15260_	.	+	72.08	20.03
chr2	619406	620768	AT2G02360_AtPP2-B10,PP2-B10	.	-	76.08	21.16
chr3	182396	184403	AT3G01470_ATHB-1,ATHB1,HAT5,HB-1,HD-ZIP-1	.	-	65.81	18.31
chr2	7898012	7899242	AT2G18162_CPuORF1	.	-	55.49	15.45
chr5	26934153	26934952	AT5G67490_	.	-	71.71	19.97
chr1	26400790	26402727	AT1G70090_GATL9,LGT8	.	+	91.13	25.4
chr2	7898012	7899242	AT2G18160_ATBZIP2,bZIP2,FTM3,GBF5	.	-	55.14	15.37
chr5	18358805	18358893	AT5G45307_MIR168,MIR168B	.	-	74.3	20.74
chr5	21390873	21391474	AT5G52780_	.	-	72.66	20.29
chr1	28366027	28367652	AT1G75540_AtBBX21,BBX21,LHUS,STH2	.	+	72.68	20.31
chr5	5576168	5578075	AT5G16970_AER,AT-AER	.	-	59.93	16.75
chr2	15029712	15029790	AT2G35744_	.	-	89.57	25.04
chr5	8188560	8189276	AT5G24165_	.	+	67.36	18.85
chr4	15067053	15069010	AT4G30960_ATCIPK6,CIPK6,SIP3,SNRK3.14	.	+	94.93	26.57
chr4	13200279	13200401	AT4G26005_	.	-	9.99	2.79
chr1	27264911	27265630	AT1G72430_SAUR78	.	-	56.07	15.7
chr5	17325013	17325923	AT5G43150_	.	+	78.6	22.03
chr2	1006256	1007183	AT2G03310_	.	-	86.63	24.29
chr1	11423059	11423684	AT1G31835_	.	-	101.14	28.48
chr1	25658033	25659273	AT1G68440_	.	+	65.71	18.51
chr3	8269716	8269859	AT3G23171_	.	-	7.83	2.2
chr1	2173952	2174894	AT1G07090_LSH6	.	-	91.27	25.73
chr2	5692148	5693016	AT2G13665_	.	+	67.75	19.1
chr1	21043348	21044738	AT1G56220_	.	+	65.02	18.35
chr1	26216224	26217851	AT1G69690_AtTCP15,TCP15	.	+	68.11	19.23
chr5	21817366	21818843	AT5G53750_	.	+	81.27	22.96
chr5	22943831	22944971	AT5G56710_	.	-	89.36	25.28
chr1	1147781	1148435	AT1G04295_	.	+	59.33	16.8
chr2	5692097	5693016	AT2G13660_	.	-	64.34	18.22
chr5	15843959	15846178	AT5G39570_	.	+	127.16	36.04
chr1	29051505	29056339	AT1G77310_	.	+	33.04	9.36
chr5	17550233	17551581	AT5G43700_ATAUX2-11,IAA4	.	+	56.21	15.93
chr5	15634586	15636065	AT5G39050_PMAT1	.	+	74.55	21.13
chr2	19018508	19019255	AT2G46330_AGP16,ATAGP16	.	-	88	24.95
chr2	7994941	7997239	AT2G18440_GUT15	.	-	83.66	23.72
chr4	6100743	6101708	AT4G09650_ATPD,PDE332	.	+	145.54	41.28
chr1	29736016	29737009	AT1G79040_PSBR	.	+	104.08	29.53
chr3	10968100	10969387	AT3G28940_	.	-	81.93	23.25
chr4	9261866	9262601	AT4G16410_	.	-	113.73	32.28
chr1	12349460	12351246	AT1G33970_	.	-	68.98	19.59
chr2	11776411	11777529	AT2G27580_	.	-	87.27	24.79
chr5	6355220	6357083	AT5G19025_	.	-	85.3	24.25
chr5	2634101	2635438	AT5G08185_MIR162A	.	-	61.95	17.61
chr1	23953233	23954492	AT1G64500_	.	+	111.24	31.63
chr5	898241	900159	AT5G03555_AtNCS1,NCS1	.	-	110.05	31.34
chr1	27344270	27345576	AT1G72630_ELF4-L2	.	+	54.72	15.59
chr2	9904787	9905920	AT2G23290_AtMYB70,MYB70	.	-	92.11	26.27
chr3	22745653	22747282	AT3G61470_LHCA2	.	+	73.05	20.84
chr1	26189836	26191323	AT1G69620_RPL34	.	+	97.51	27.83
chr5	5144093	5144542	AT5G15770_AtGNA1,GNA1	.	-	87.9	25.19
chr2	12603803	12605271	AT2G29360_	.	+	75.25	21.58
chr3	5347822	5349288	AT3G15810_	.	-	59.61	17.1
chr1	199639	201775	AT1G01550_BPS1	.	+	66.75	19.15
chr1	27984745	27984826	AT1G74456_	.	-	65.2	18.71
chr4	9171467	9173105	AT4G16190_	.	+	109.22	31.35
chr3	182396	184403	AT3G01472_CPuORF33	.	-	66.12	18.98
chr1	20356954	20357788	AT1G54500_	.	-	80.6	23.14
chr4	15276180	15277219	AT4G31510_	.	-	81.52	23.44
chr2	18425180	18426060	AT2G44670_	.	+	75.19	21.64
chr5	26567521	26567604	AT5G66564_	.	+	43.84	12.63
chr1	25230265	25231840	AT1G67340_	.	+	87.89	25.39
chr5	25423407	25423791	AT5G63500_	.	+	57.17	16.52
chr3	20691647	20691806	AT3G55734_AT-MIR393B,MIR393B	.	+	34.53	9.98
chr5	24127128	24127935	AT5G59910_HTB4	.	+	112.85	32.65
chr5	8736074	8738584	AT5G25220_KNAT3	.	+	80.47	23.28
chr3	5763586	5764654	AT3G16870_GATA17	.	-	75.11	21.74
chr2	255249	257550	AT2G01570_RGA,RGA1	.	-	97.51	28.23
chr4	2350498	2352018	AT4G04640_ATPC1	.	-	145.56	42.18
chr5	21152214	21154244	AT5G52060_ATBAG1,BAG1	.	-	86.29	25.01
chr1	28446632	28448646	AT1G75760_	.	-	75.69	21.94
chr4	2567474	2568162	AT4G05010_AtFBS3,FBS3	.	+	54.61	15.84
chr2	7946158	7946406	AT2G18270_	.	-	114.27	33.17
chr3	7906791	7908740	AT3G22370_AOX1A,ATAOX1A,AtHSR3,HSR3	.	+	81.81	23.78
chr3	19484867	19485922	AT3G52530_	.	-	84.01	24.44
chr2	19232649	19235087	AT2G46790_APRR9,PRR9,TL1	.	+	78.32	22.8
chr1	23297720	23298682	AT1G62900_	.	+	10.46	3.04
chr1	7176775	7178820	AT1G20693_HMG,HMGB2,NFD02,NFD2	.	+	75.62	22.03
chr4	8875918	8877799	AT4G15545_	.	+	76.49	22.29
chr1	24361032	24361993	AT1G65520_ATECI1,ECHIC,ECI1,PEC11	.	-	55.28	16.11
chr1	1828413	1829890	AT1G06040_BBX24,STO	.	-	108.48	31.63
chr4	142601	144523	AT4G00330_CRCK2	.	-	75.72	22.08
chr1	11739304	11740361	AT1G32470_	.	-	58.19	16.97
chr1	4854384	4855200	AT1G14200_	.	-	89.57	26.13
chr1	12654940	12656486	AT1G34570_	.	-	52.74	15.39
chr1	10106898	10106969	AT1G28950_	.	+	27.93	8.15
chr1	25829042	25829813	AT1G68760_ATNUDT1,ATNUDX1,NUDX1,NUDX1	.	+	62.99	18.39
chr4	17873485	17874804	AT4G38060_CCI2	.	-	97.48	28.51
chr3	17399877	17401731	AT3G47250_	.	-	87.03	25.47
chr4	9293543	9295625	AT4G16490_	.	-	139.41	40.87
chr1	28553987	28554768	AT1G76100_PETE1	.	-	94.61	27.82
chr2	11392965	11394279	AT2G26740_ATSEH,SEH	.	-	56.2	16.53
chr4	5729192	5730850	AT4G08930_APRL6,ATAPRL6	.	+	77.84	22.9
chr3	20896481	20897593	AT3G56360_	.	+	82.4	24.26
chr2	12225842	12228543	AT2G28550_RAP2.7,TOE1	.	-	77.47	22.82
chr1	28740691	28742207	AT1G76590_	.	+	59.49	17.53
chr5	26933950	26934867	AT5G67488_	.	+	68.89	20.31
chr3	19268043	19269479	AT3G51920_ATCML9,CAM9,CML9	.	-	56.67	16.71
chr3	17337065	17337733	AT3G47070_	.	-	56.79	16.75
chr5	26793880	26795303	AT5G67140_	.	-	75.89	22.39
chr4	12870006	12871316	AT4G25050_ACP4	.	+	94.41	27.88
chr2	17582869	17584194	AT2G42190_	.	+	90.36	26.7
chr4	10370704	10372045	AT4G18930_	.	+	58.17	17.19
chr3	17130367	17133338	AT3G46530_RPP13	.	-	74.91	22.14
chr3	4496822	4496918	AT3G13724_MIR823A	.	-	39.9	11.79
chr4	6872151	6873541	AT4G11300_	.	-	85.96	25.41
chr2	10153797	10155647	AT2G23840_	.	-	78.14	23.1
chr1	6712038	6714252	AT1G19400_	.	-	65.48	19.37
chr2	19079406	19080053	AT2G46490_	.	+	93.51	27.67
chr3	9722443	9723815	AT3G26520_GAMMA-TIP2,SITIP,TIP1;2,TIP2	.	-	76.16	22.54
chr4	16635684	16636975	AT4G34920_	.	+	78.71	23.32
chr5	15608814	15611598	AT5G38990_	.	+	76.06	22.54
chr2	6564104	6564316	AT2G15128_	.	+	45.17	13.41
chr1	25926963	25927331	AT1G68945_	.	+	57.39	17.05
chr5	19984849	19985697	AT5G49300_GATA16	.	-	74.06	22.01
chr3	2889486	2890229	AT3G09390_ATMT-1,ATMT-K,MT2A	.	-	54.27	16.13
chr1	28955637	28960096	AT1G77080_AGL27,FLM,MAF1	.	+	59.44	17.67
chr1	7955493	7958442	AT1G22530_PATL2	.	-	63.39	18.85
chr4	16136749	16138201	AT4G33565_	.	+	66.68	19.83
chr2	17991052	17992047	AT2G43290_MSS3	.	-	79.28	23.58
chr3	9578217	9580086	AT3G26180_CYP71B20	.	-	39.17	11.65
chr4	5931251	5932152	AT4G09350_CRRJ,DJC75,NdhT	.	-	67.65	20.14
chr3	9758887	9760544	AT3G26580_	.	+	102.85	30.65
chr3	10959686	10960808	AT3G28930_AIG2	.	-	52.98	15.79
chr1	25394068	25395154	AT1G67740_PSBY,YCF32	.	-	119.38	35.59
chr5	26495955	26497855	AT5G66320_GATA5	.	-	71.88	21.43
chr1	11758211	11759280	AT1G32520_	.	-	67.95	20.26
chr3	6546463	6548062	AT3G18980_ETP1	.	+	64.69	19.3
chr1	8897755	8899102	AT1G25370_	.	-	79.53	23.73
chr5	3831664	3832944	AT5G11890_EMB3135	.	+	104.51	31.21
chr1	4743095	4743167	AT1G13850_	.	+	7.05	2.1
chr2	9219324	9220590	AT2G21530_	.	+	60.17	17.98
chr5	7249268	7250539	AT5G21940_	.	-	62.62	18.74
chr5	17097595	17099395	AT5G42650_AOS,CYP74A,DDE2	.	-	63.28	18.95
chr5	24082197	24083431	AT5G59780_ATMYB59,ATMYB59-1,ATMYB59-2,ATMYB59-3,MYB59	.	-	61.78	18.51
chr2	12872134	12873820	AT2G30140_UGT87A2	.	+	72.32	21.67
chr2	1077036	1078083	AT2G03550_	.	+	87.92	26.35
chr2	10281847	10283735	AT2G24180_CYP71B6	.	+	90.49	27.13
chr4	7009769	7011375	AT4G11600_ATGPX6,GPX6,LSC803,PHGPX	.	-	75.49	22.64
chr4	6018135	6019759	AT4G09500_	.	+	64.6	19.38
chr1	17484365	17485470	AT1G47578_	.	+	51.9	15.57
chr1	607808	609465	AT1G02780_emb2386	.	-	84.25	25.3
chr5	19309227	19310272	AT5G47640_NF-YB2	.	+	112.14	33.68
chr2	18017116	18018691	AT2G43375_	.	-	52.95	15.9
chr3	245478	246508	AT3G01660_	.	+	70.87	21.29
chr3	6876079	6877642	AT3G19800_	.	+	81.71	24.55
chr4	11987705	11989006	AT4G22820_	.	-	91.21	27.41
chr4	7521322	7522670	AT4G12800_PSAL	.	+	74.25	22.32
chr4	16940507	16941862	AT4G35750_	.	-	70.21	21.12
chr1	30194618	30196554	AT1G80310_MOT2	.	+	87.4	26.3
chr2	15270088	15272823	AT2G36400_AtGRF3,GRF3	.	-	58.62	17.64
chr1	10051001	10053117	AT1G28600_	.	-	58.02	17.46
chr4	493548	494850	AT4G01150_CURT1A	.	+	79.81	24.03
chr5	23996073	23997590	AT5G59540_	.	-	69.71	21
chr3	2296036	2297789	AT3G07215_	.	-	63.03	18.99
chr5	24480449	24481873	AT5G60850_OBP4	.	+	85.35	25.72
chr4	15940561	15941330	AT4G33040_	.	-	81.49	24.57
chr1	28715078	28717416	AT1G76520_	.	+	65.65	19.82
chr1	6941285	6941373	AT1G20015_	.	+	36.93	11.15
chr1	25272182	25273576	AT1G67470_	.	+	64.76	19.56
chr5	14979159	14981400	AT5G37710_	.	+	55.24	16.69
chr1	20802670	20803449	AT1G55670_PSAG	.	-	126.98	38.4
chr3	4908948	4910476	AT3G14595_	.	+	58.56	17.73
chr5	16818388	16818955	AT5G42060_	.	-	48.42	14.66
chr4	7730961	7731041	AT4G13265_	.	+	8.44	2.55
chr2	8550313	8551858	AT2G19810_AtOZF1,AtTZF2,OZF1,TZF2	.	+	97.15	29.43
chr2	9079042	9079538	AT2G21188_	.	-	42.07	12.75
chr4	16277366	16277779	AT4G33960_	.	+	31.44	9.53
chr3	23289425	23291486	AT3G63010_ATGID1B,GID1B	.	+	71.94	21.82
chr5	3593380	3594992	AT5G11260_HY5,TED	.	-	76.5	23.22
chr1	1128188	1129551	AT1G04240_IAA3,SHY2	.	-	70.92	21.53
chr1	898876	899655	AT1G03600_PSB27	.	+	88.18	26.79
chr3	11051489	11052694	AT3G29075_	.	-	104.1	31.63
chr1	2368837	2369734	AT1G07660_	.	+	63.02	19.16
chr4	16379603	16381307	AT4G34215_	.	-	91.84	27.93
chr2	16539384	16540417	AT2G39681_TAS2	.	-	87	26.46
chr4	6384462	6386189	AT4G10300_	.	+	74.3	22.6
chr5	26468533	26470556	AT5G66250_	.	+	67.81	20.64
chr1	2034156	2035626	AT1G06645_	.	+	67.41	20.53
chr3	20878539	20879568	AT3G56290_	.	-	66.48	20.26
chr2	13437974	13439881	AT2G31570_ATGPX2,GPX2	.	-	56.72	17.29
chr2	11316412	11318483	AT2G26600_	.	+	60.75	18.52
chr3	19803655	19805713	AT3G53420_AtPIP2;1,PIP2,PIP2;1,PIP2A	.	-	67.57	20.62
chr4	9833661	9834727	AT4G17670_	.	-	48.68	14.87
chr3	21827978	21830507	AT3G59060_PIF5,PIL6	.	-	60.29	18.42
chr1	4241592	4243008	AT1G12440_	.	-	76.47	23.37
chr1	1454969	1455220	AT1G05065_CLE20	.	-	41.35	12.64
chr1	27148460	27150980	AT1G72150_PATL1	.	+	76.29	23.35
chr5	26568653	26570278	AT5G66570_MSP-1,OE33,OEE1,OEE33,PSBO-1,PSBO1	.	+	101.82	31.19
chr1	10098653	10098724	AT1G28850_	.	+	60.4	18.52
chr1	23667616	23669080	AT1G63800_UBC5	.	-	75.59	23.18
chr5	3863071	3863755	AT5G11970_	.	-	81.76	25.08
chr1	16135852	16137463	AT1G42990_ATBZIP60,BZIP60,BZIP60	.	-	102.28	31.4
chr4	13533477	13534359	AT4G26950_	.	-	57.46	17.65
chr3	1476982	1478730	AT3G05200_ATL6	.	+	83.24	25.58
chr4	9131650	9133156	AT4G16141_	.	-	79.96	24.59
chr3	995217	997410	AT3G03870_	.	+	55.27	17
chr5	25628588	25629615	AT5G64040_PSAN	.	-	83.62	25.73
chr1	17282825	17285670	AT1G47128_RD21,RD21A	.	-	83.46	25.69
chr1	18030704	18031439	AT1G48745_	.	+	47.83	14.72
chr4	10574768	10576428	AT4G19390_	.	-	74.22	22.85
chr3	4818298	4821006	AT3G14415_GOX2	.	+	65.1	20.06
chr5	17357377	17358082	AT5G43260_	.	-	118.1	36.4
chr3	23353615	23355160	AT3G63210_MARD1	.	-	72.92	22.48
chr3	16074096	16074678	AT3G44450_	.	-	68.34	21.07
chr3	8979067	8979153	AT3G24612_	.	-	41.68	12.85
chr4	7641378	7642598	AT4G13110_	.	+	83.35	25.71
chr3	10518070	10519166	AT3G28200_	.	+	110.92	34.22
chr5	16147594	16149198	AT5G40370_GRXC2	.	-	64.75	19.98
chr1	26363093	26364759	AT1G70000_	.	-	69.57	21.47
chr5	13611798	13611932	AT5G35407_MIR396B	.	+	40.49	12.5
chr1	24973028	24974791	AT1G66940_	.	-	53.11	16.4
chr3	8901154	8902638	AT3G24480_	.	-	86.24	26.66
chr4	16056156	16056416	AT4G33310_	.	+	96.76	29.93
chr4	13239979	13241283	AT4G26130_	.	-	78.71	24.35
chr4	15413319	15415873	AT4G31877_MIR156C	.	-	71.76	22.2
chr5	4866237	4866939	AT5G15022_	.	+	55.06	17.05
chr3	16756770	16758698	AT3G45640_ATMAPK3,ATMPK3,MPK3	.	+	72.55	22.47
chr5	10342024	10342997	AT5G28390_	.	-	6.31	1.95
chr2	8493475	8495823	AT2G19650_	.	-	82.21	25.49
chr1	28212518	28212603	AT1G75166_	.	+	76.9	23.85
chr1	7814763	7815631	AT1G22140_	.	-	80.38	24.95
chr2	10327035	10329941	AT2G24270_ALDH11A3	.	-	77.86	24.17
chr3	18890876	18892426	AT3G50820_OEC33,PSBO-2,PSBO2	.	-	75.73	23.53
chr2	7576474	7577300	AT2G17450_RHA3A	.	-	81.63	25.38
chr1	29715079	29716111	AT1G78995_	.	-	75.54	23.5
chr2	1147807	1149061	AT2G03750_	.	-	70.8	22.03
chr5	17340138	17341569	AT5G43190_	.	-	80.77	25.14
chr2	427117	428839	AT2G01930_ATBPC1,BBR,BPC1	.	-	57.66	17.96
chr3	1112990	1113659	AT3G04230_	.	-	96.08	29.94
chr1	22444390	22445222	AT1G60950_ATFD2,FD2,FED	.	+	111.34	34.71
chr3	19624343	19626258	AT3G52920_	.	+	88.14	27.5
chr5	26136094	26137183	AT5G65410_ATHB25,HB25,ZFHD2,ZHD1	.	+	139.47	43.54
chr4	2289959	2292755	AT4G04570_CRK40	.	+	66.89	20.89
chr2	11864154	11864225	AT2G27850_	.	-	10.52	3.28
chr1	11827433	11829759	AT1G32700_	.	+	56.32	17.59
chr2	8736734	8737767	AT2G20260_PSAE-2	.	+	68.38	21.36
chr1	5168596	5170066	AT1G15000_scpl50	.	+	79.35	24.79
chr3	20358896	20361233	AT3G54950_PLA,PLP7,pPLAIIIbeta	.	-	62.61	19.56
chr2	8293682	8296275	AT2G19130_	.	+	67.6	21.13
chr1	29137626	29138212	AT1G77540_	.	-	71.33	22.3
chr4	185450	187627	AT4G00430_PIP1;4,PIP1E,TMP-C	.	-	73.72	23.05
chr4	5923400	5924532	AT4G09320_ATNDK1,NDK1,NDPK1	.	+	86.6	27.09
chr1	18218750	18219261	AT1G49245_	.	+	44.71	14
chr2	11763217	11764845	AT2G27530_PGY1	.	-	88.5	27.72
chr4	17540490	17541799	AT4G37260_ATMYB73,MYB73	.	+	68.07	21.33
chr2	9924933	9926372	AT2G23320_AtWRKY15,WRKY15	.	+	51.79	16.23
chr5	26347593	26349056	AT5G65860_	.	-	84.84	26.6
chr5	17840220	17840304	AT5G44286_	.	+	37.44	11.74
chr3	19510338	19511335	AT3G52605_	.	-	87.34	27.4
chr1	24614962	24616930	AT1G66130_	.	+	73.41	23.04
chr1	7179452	7181499	AT1G20696_HMGB3,NFD03,NFD3	.	+	76.09	23.89
chr3	20709386	20711640	AT3G55800_SBPASE	.	+	71.25	22.37
chr2	15278769	15280688	AT2G36410_	.	+	80.17	25.18
chr1	25340575	25342082	AT1G67620_	.	+	59.41	18.66
chr4	13571921	13573070	AT4G27030_FAD4,FADA	.	+	97.33	30.58
chr1	6709778	6711788	AT1G19396_	.	+	62.67	19.69
chr1	26036570	26037659	AT1G69252_	.	+	66.99	21.05
chr4	16536865	16537746	AT4G34630_	.	-	123.83	38.96
chr1	21078820	21080423	AT1G56300_	.	-	44.19	13.9
chr3	22914154	22915325	AT3G61890_ATHB-12,ATHB12,HB-12	.	-	88.8	27.97
chr2	12254888	12255837	AT2G28605_	.	+	82.25	25.92
chr3	23029100	23031155	AT3G62220_	.	-	60.42	19.04
chr1	5149226	5151354	AT1G14920_GAI,RGA2	.	+	95.98	30.25
chr3	3475002	3475604	AT3G11090_LBD21	.	+	70.12	22.1
chr3	22361530	22362579	AT3G60520_	.	-	79	24.91
chr1	9846884	9847923	AT1G28190_	.	-	73.45	23.16
chr4	18432899	18433695	AT4G39730_PLAT1	.	+	77.22	24.35
chr2	12638156	12638228	AT2G29520_	.	-	42.93	13.54
chr1	24600217	24601157	AT1G66080_	.	-	95.45	30.13
chr3	20132239	20132535	AT3G54363_	.	-	47.33	14.95
chr4	18469348	18471967	AT4G39800_ATIPS1,ATMIPS1,MI-1-P,MIPS1,MIPS1	.	-	67.74	21.41
chr5	18940969	18942602	AT5G46680_	.	+	57.25	18.1
chr2	15320385	15320467	AT2G36520_	.	-	10.77	3.4
chr3	17504000	17506058	AT3G47500_CDF3	.	-	74.97	23.73
chr2	18562102	18563678	AT2G44995_	.	+	17.39	5.5
chr2	19176126	19176261	AT2G46685_MIR166,MIR166A	.	+	59.29	18.77
chr1	16127381	16129843	AT1G42970_GAPB	.	+	73.94	23.41
chr1	5844676	5845661	AT1G17100_AtHBP1,HBP1	.	+	65.82	20.85
chr2	19529744	19531659	AT2G47610_	.	+	81.12	25.7
chr2	10753835	10754713	AT2G25250_	.	+	71.03	22.51
chr4	17229554	17230296	AT4G36515_	.	-	55.03	17.44
chr4	13669308	13672348	AT4G27300_	.	-	59.95	19
chr5	17455233	17456657	AT5G43440_	.	-	74.63	23.68
chr3	3102157	3104014	AT3G10060_	.	+	80.99	25.7
chr3	8375372	8376392	AT3G23390_	.	+	97.13	30.83
chr3	8703286	8704228	AT3G24100_	.	+	63.45	20.14
chr4	10231218	10234693	AT4G18570_	.	+	54.68	17.36
chr2	19136019	19136600	AT2G46600_	.	+	73.95	23.49
chr5	20106653	20107191	AT5G49550_BLOS2	.	-	68.97	21.91
chr3	10976108	10977492	AT3G28950_	.	-	58.14	18.47
chr5	7005844	7007117	AT5G20700_	.	-	69.64	22.13
chr5	25248797	25249942	AT5G62900_	.	+	50.98	16.2
chr1	26695166	26696392	AT1G70780_	.	-	79.56	25.29
chr1	26695166	26696392	AT1G70782_CPuORF28	.	-	79.56	25.29
chr1	22699715	22701383	AT1G61520_LHCA3	.	+	99.32	31.58
chr4	5331769	5331909	AT4G08406_	.	-	11.12	3.53
chr1	21742944	21743891	AT1G58590_	.	-	53.96	17.16
chr1	8398115	8399749	AT1G23740_AOR	.	-	87.87	27.98
chr5	206432	208611	AT5G01520_AIRP2,AtAIRP2	.	+	54.82	17.46
chr1	17687269	17688816	AT1G47970_	.	+	93.67	29.84
chr1	930828	931895	AT1G03730_	.	-	62.63	19.95
chr2	8369794	8370406	AT2G19310_	.	-	79.4	25.3
chr1	7103454	7105881	AT1G20510_OPCL1	.	-	73.84	23.53
chr1	50075	51199	AT1G01100_	.	-	90.56	28.86
chr4	11133186	11133970	AT4G20780_CML42	.	-	78.51	25.02
chr4	9254555	9256219	AT4G16380_	.	+	45.96	14.65
chr2	17363907	17364434	AT2G41650_	.	+	52.3	16.68
chr2	11832809	11834369	AT2G27770_	.	-	63.33	20.2
chr5	4934883	4936408	AT5G15200_	.	-	96.41	30.76
chr1	19158752	19161552	AT1G51680_4CL.1,4CL1,AT4CL1	.	-	74.06	23.64
chr5	23087235	23089627	AT5G57050_ABI2,AtABI2	.	+	75.3	24.05
chr5	6000014	6000331	AT5G18150_	.	-	98.14	31.35
chr4	6892055	6894149	AT4G11330_ATMPK5,MPK5	.	+	62.14	19.85
chr3	7676927	7678414	AT3G21790_	.	-	69.9	22.34
chr4	2506163	2506786	AT4G04925_	.	+	31.92	10.2
chr4	8510908	8511928	AT4G14830_HSP1	.	+	85.38	27.32
chr3	6554531	6555657	AT3G19002_	.	+	58.13	18.6
chr1	20803704	20804573	AT1G55675_	.	-	48.26	15.46
chr3	15801372	15802730	AT3G44020_	.	+	70.78	22.68
chr2	18237152	18238173	AT2G44080_ARL	.	+	87.14	27.93
chr1	25725455	25727701	AT1G68550_CRF10	.	-	70.22	22.51
chr1	25725455	25727701	AT1G68552_CPuORF53	.	-	70.22	22.51
chr1	18802688	18803363	AT1G50732_	.	+	34.65	11.11
chr1	29867880	29869633	AT1G79410_AtOCT5,OCT5	.	-	54.71	17.55
chr3	1614178	1615506	AT3G05560_	.	+	98.43	31.59
chr2	12803853	12804977	AT2G30000_	.	-	54.49	17.49
chr5	22895616	22896653	AT5G56550_ATOXS3,OXS3	.	-	48.18	15.47
chr2	8373766	8375939	AT2G19340_	.	-	63.78	20.49
chr3	19822726	19823493	AT3G53470_	.	+	69.55	22.37
chr2	13381910	13383470	AT2G31380_BBX25,STH	.	+	79.71	25.64
chr4	642733	644336	AT4G01510_ARV2	.	+	54.78	17.62
chr1	5685503	5686368	AT1G16635_	.	-	37.23	11.98
chr3	6840281	6842320	AT3G19680_	.	+	97.55	31.41
chr5	24128756	24130888	AT5G59920_ULI3	.	+	82.91	26.7
chr1	7908568	7909708	AT1G22403_	.	-	75.32	24.28
chr5	22196477	22197492	AT5G54640_ATHTA1,HTA1,RAT5	.	+	76.88	24.79
chr1	11171225	11171835	AT1G31258_	.	+	37.6	12.13
chr4	6408016	6409677	AT4G10340_LHCB5	.	+	97.51	31.51
chr4	820336	821505	AT4G01897_	.	-	70.67	22.84
chr3	18037047	18038234	AT3G48690_ATCXE12,CXE12	.	-	142.21	45.97
chr2	15049150	15050323	AT2G35810_	.	+	47.77	15.44
chr1	19453569	19454697	AT1G52220_CURT1C	.	-	69.62	22.51
chr3	5341426	5342557	AT3G15780_	.	+	92.66	29.98
chr3	2384418	2385719	AT3G07460_	.	-	96.4	31.2
chr2	18072371	18072963	AT2G43540_	.	+	71.92	23.29
chr5	8013085	8014228	AT5G23760_	.	-	46.44	15.04
chr1	21512384	21514022	AT1G58100_TCP8	.	-	102.78	33.3
chr2	9356983	9357916	AT2G21970_SEP2	.	-	105.4	34.15
chr4	17280528	17282730	AT4G36648_	.	-	76.37	24.75
chr5	26410520	26411355	AT5G66040_STR16	.	+	55.11	17.86
chr5	5227924	5229116	AT5G16010_	.	+	81.04	26.27
chr2	14988447	14990426	AT2G35660_CTF2A	.	+	75.24	24.4
chr1	21256176	21257973	AT1G56700_	.	+	65	21.1
chr1	20412928	20413000	AT1G54670_	.	-	11.23	3.64
chr3	19787894	19788843	AT3G53370_	.	-	43.37	14.08
chr5	3030817	3030889	AT5G09755_	.	-	11.35	3.68
chr5	23783123	23785334	AT5G58900_	.	-	60.13	19.53
chr1	20268485	20270107	AT1G54290_	.	-	52.06	16.91
chr5	15950022	15951425	AT5G39850_	.	+	64.09	20.82
chr4	7684156	7686876	AT4G13250_NYC1	.	-	64.56	20.98
chr2	9128147	9130240	AT2G21330_AtFBA1,FBA1	.	-	81.85	26.61
chr5	19540937	19542426	AT5G48180_AtNSP5,NSP5	.	-	78.67	25.6
chr1	13700814	13701632	AT1G36380_	.	+	64.37	20.95
chr4	10772402	10774023	AT4G19830_	.	-	54.66	17.79
chr2	1039205	1040118	AT2G03440_ATNRP1,NRP1	.	-	96.17	31.31
chr1	26762339	26764623	AT1G70980_SYNC3	.	+	73.66	23.98
chr5	7912769	7913505	AT5G23460_	.	+	44.54	14.5
chr4	1064363	1066372	AT4G02420_LecRK-IV.4	.	-	60.15	19.59
chr3	385317	386538	AT3G02140_AFP4,TMAC2	.	-	74.77	24.36
chr1	753307	754198	AT1G03130_PSAD-2	.	-	83.42	27.19
chr5	4069577	4071227	AT5G12890_	.	-	80.04	26.09
chr1	12396420	12398369	AT1G34060_	.	-	73.8	24.07
chr1	16266641	16268870	AT1G43170_ARP1,emb2207,RP1,RPL3A	.	+	75.07	24.51
chr3	5952187	5954084	AT3G17390_MAT4,MTO3,SAMS3	.	-	85.57	27.96
chr3	104835	104909	AT3G01316_	.	-	39.26	12.83
chr4	8344616	8345218	AT4G14540_NF-YB3	.	+	54.92	17.96
chr1	16912154	16913664	AT1G44790_	.	-	51.82	16.95
chr2	12666832	12666957	AT2G29628_	.	-	32.44	10.62
chr3	15778402	15779311	AT3G43980_	.	-	87.32	28.61
chr4	16661329	16662367	AT4G34990_AtMYB32,MYB32	.	-	60.65	19.87
chr5	21910533	21912777	AT5G53970_TAT7	.	+	73.74	24.17
chr3	21076505	21078443	AT3G56940_ACSF,CHL27,CRD1	.	+	104.98	34.42
chr2	16643381	16645377	AT2G39870_	.	+	62.65	20.54
chr5	6821990	6825981	AT5G20220_	.	+	55.16	18.09
chr1	5066636	5068645	AT1G14720_ATXTH28,EXGT-A2,XTH28,XTR2	.	-	59.29	19.45
chr1	2035839	2037366	AT1G06650_	.	+	91.43	30.03
chr3	7644350	7646383	AT3G21700_ATSGP2,SGP2	.	+	54.77	18
chr5	18959169	18959749	AT5G46720_	.	+	65.2	21.43
chr5	1606552	1607656	AT5G05435_	.	+	49.2	16.17
chr4	13098141	13099578	AT4G25710_	.	-	88.52	29.1
chr4	7594944	7595463	AT4G12990_	.	-	89.29	29.36
chr4	18555577	18556972	AT4G40030_H3.3	.	-	77.67	25.54
chr2	19607996	19609645	AT2G47890_	.	+	93.02	30.59
chr1	29745939	29746842	AT1G79075_	.	+	44.2	14.54
chr1	22218788	22221409	AT1G60260_BGLU5	.	-	47.17	15.52
chr2	9036793	9037650	AT2G21060_ATCSP4,ATGRP2B,GRP2B	.	-	79.4	26.13
chr1	1147523	1148533	AT1G04290_	.	-	44.3	14.58
chr3	21109614	21111432	AT3G57040_ARR9,ATRR4	.	+	49.83	16.41
chr5	16831728	16832279	AT5G42110_	.	-	53.41	17.59
chr2	7955677	7955750	AT2G18310_	.	-	13.12	4.32
chr5	22038273	22039568	AT5G54270_LHCB3,LHCB3*1	.	+	74.79	24.66
chr1	9731260	9732719	AT1G27930_	.	-	93.8	30.93
chr5	6851452	6853066	AT5G20290_	.	-	93.53	30.85
chr2	14324309	14325192	AT2G33855_	.	-	49.45	16.32
chr4	550349	553016	AT4G01330_	.	+	58.53	19.33
chr1	20588397	20589199	AT1G55190_PRA1.F2,PRA7	.	+	80.95	26.75
chr3	21745707	21746545	AT3G58795_	.	+	52.57	17.37
chr5	3510118	3513305	AT5G11060_KNAT4	.	+	69.86	23.09
chr4	2671822	2673243	AT4G05180_PSBQ,PSBQ-2,PSII-Q	.	-	76.96	25.44
chr4	10035485	10036541	AT4G18100_	.	-	87.89	29.07
chr3	3476187	3477405	AT3G11100_	.	-	84.47	27.94
chr5	17430539	17431765	AT5G43403_	.	-	71.83	23.76
chr4	5992966	5994258	AT4G09460_AtMYB6,MYB6	.	+	51.52	17.06
chr4	16498391	16500174	AT4G34530_CIB1	.	+	66.91	22.17
chr2	18364756	18367725	AT2G44490_BGLU26,PEN2	.	+	61.25	20.3
chr2	7692444	7693253	AT2G17705_	.	+	68.19	22.62
chr5	24910358	24915210	AT5G62000_ARF1-BP,ARF2,HSS,ORE14	.	+	70.75	23.47
chr2	15890972	15891843	AT2G37970_AtHBP2,HBP2,SOUL-1	.	+	92.77	30.79
chr2	13220478	13222609	AT2G31070_TCP10	.	-	85.66	28.43
chr4	16887165	16888356	AT4G35570_HMGB5,HMGD,NFD05,NFD5	.	-	57	18.92
chr5	9054122	9055251	AT5G25940_	.	-	56.8	18.87
chr5	20744566	20745703	AT5G51010_	.	+	75.54	25.1
chr5	17197641	17199793	AT5G42900_COR27	.	-	46.43	15.43
chr5	16034576	16039096	AT5G40060_	.	+	51.65	17.17
chr5	17102924	17105966	AT5G42660_	.	-	64.2	21.36
chr1	6465487	6466454	AT1G18745_	.	-	72.93	24.27
chr1	12736092	12738196	AT1G34750_	.	-	44.99	14.98
chr2	3250757	3251545	AT2G07777_	.	-	0.92	0.3
chr1	19305315	19307510	AT1G51950_IAA18	.	+	55.08	18.36
chr1	21936296	21937959	AT1G59700_ATGSTU16,GSTU16	.	+	59.93	19.99
chr1	10722197	10723247	AT1G30380_PSAK	.	+	63.85	21.3
chr4	1072481	1073779	AT4G02440_EID1	.	+	99.53	33.21
chr2	17113866	17114804	AT2G41010_ATCAMBP25,CAMBP25	.	-	68.81	22.96
chr5	2858849	2860262	AT5G08790_anac081,ATAF2	.	-	71.2	23.76
chr5	18218586	18219960	AT5G45100_BRG1	.	+	55.72	18.6
chr5	24051552	24052143	AT5G59690_	.	+	84.94	28.37
chr1	5723088	5726478	AT1G16720_HCF173	.	+	67.3	22.49
chr4	14437561	14439723	AT4G29310_	.	-	80.6	26.94
chr2	16374896	16377020	AT2G39220_PLA,PLP6	.	-	64.01	21.4
chr1	2349097	2351692	AT1G07630_PLL5	.	+	78.02	26.09
chr3	3069231	3071429	AT3G09980_	.	+	93.36	31.23
chr1	8933716	8935460	AT1G25440_BBX15	.	-	98.13	32.83
chr5	18114666	18118608	AT5G44870_LAZ5,TTR1	.	+	56.9	19.05
chr5	21307049	21309302	AT5G52510_SCL8	.	+	77.74	26.03
chr5	7602913	7603499	AT5G22788_	.	-	45.49	15.23
chr2	17057402	17058122	AT2G40880_ATCYSA,CYSA,FL3-27	.	+	59.78	20.02
chr5	24146175	24146726	AT5G59970_	.	-	91.6	30.68
chr2	16214189	16215264	AT2G38790_	.	-	58.57	19.62
chr5	20543310	20544753	AT5G50450_	.	-	59.67	19.99
chr1	630505	633259	AT1G02850_BGLU11	.	+	46.89	15.71
chr2	12114331	12116848	AT2G28350_ARF10	.	+	86.54	29
chr4	11889098	11890725	AT4G22580_	.	-	122.35	41.03
chr1	9285099	9286324	AT1G26800_	.	-	59.41	19.92
chr4	10809877	10811084	AT4G19950_	.	+	66.02	22.14
chr2	19000191	19003403	AT2G46270_GBF3	.	+	61.21	20.53
chr4	11157916	11159535	AT4G20840_	.	+	62.31	20.9
chr4	461592	463556	AT4G01070_GT72B1,UGT72B1	.	-	64.63	21.68
chr4	13219961	13222284	AT4G26080_ABI1,AtABI1	.	-	93.56	31.39
chr5	591771	593187	AT5G02630_Cand6	.	+	78.37	26.3
chr3	616380	617322	AT3G02832_	.	+	57.16	19.19
chr4	18163496	18165762	AT4G38970_AtFBA2,FBA2	.	-	78.62	26.4
chr3	19108134	19108890	AT3G51500_	.	+	75.04	25.2
chr4	11741855	11743318	AT4G22190_	.	-	57.54	19.33
chr1	19474898	19476234	AT1G52300_	.	-	91.76	30.84
chr2	6666316	6667704	AT2G15320_	.	-	70.17	23.59
chr4	1059889	1062153	AT4G02410_AtLPK1,LecRK-IV.3,LPK1	.	-	90.2	30.33
chr2	10204992	10206407	AT2G23985_	.	+	57.31	19.27
chr5	16818984	16820195	AT5G42070_	.	-	89.23	30.01
chr3	21062990	21063717	AT3G56890_	.	-	72.06	24.24
chr1	2443971	2444123	AT1G07901_	.	-	58.98	19.84
chr5	24183567	24185629	AT5G60050_	.	-	77.92	26.22
chr2	11451973	11453843	AT2G26860_	.	-	59.99	20.19
chr1	4542168	4543742	AT1G13260_EDF4,RAV1	.	+	75.18	25.31
chr5	22580670	22581335	AT5G55790_	.	-	44.81	15.09
chr1	5446462	5447859	AT1G15820_CP24,LHCB6	.	-	87.67	29.53
chr2	11545753	11548293	AT2G27050_AtEIL1,EIL1	.	+	64.97	21.89
chr3	6453368	6454018	AT3G18740_RLK902	.	+	80.93	27.27
chr2	15296701	15298514	AT2G36460_FBA6	.	-	85.57	28.84
chr3	17493372	17495033	AT3G47470_CAB4,LHCA4	.	-	95.58	32.22
chr5	2680744	2681813	AT5G08330_AtTCP11,TCP11	.	+	78.37	26.42
chr2	100649	101495	AT2G01150_RHA2B	.	+	80.54	27.16
chr5	18018905	18021385	AT5G44670_GALS2	.	-	67.59	22.8
chr3	5612500	5614410	AT3G16500_IAA26,PAP1	.	-	53.36	18
chr3	1167276	1168659	AT3G04400_emb2171	.	+	103.84	35.04
chr2	18910295	18911982	AT2G45960_ATHH2,PIP1;2,PIP1B,TMP-A	.	+	82.6	27.88
chr1	23712276	23716124	AT1G63880_	.	-	58	19.58
chr3	17771170	17772926	AT3G48115_	.	-	66.04	22.3
chr2	13672250	13673256	AT2G32180_PTAC18	.	-	29.31	9.9
chr1	4592481	4594391	AT1G13390_	.	-	48.33	16.33
chr2	4485414	4485539	AT2G11271_	.	-	12.77	4.31
chr2	10333284	10337128	AT2G24280_	.	+	47.67	16.11
chr2	16537288	16538277	AT2G39675_TAS1C	.	-	54.14	18.3
chr5	21649532	21651593	AT5G53370_ATPMEPCRF,PMEPCRF	.	-	56.91	19.24
chr1	28547786	28549419	AT1G76080_ATCDSP32,CDSP32	.	-	64.37	21.77
chr3	1105963	1108069	AT3G04210_	.	-	53.61	18.13
chr2	17507509	17508616	AT2G41940_ZFP8	.	+	82.4	27.9
chr4	12299823	12302719	AT4G23570_SGT1A	.	+	52.92	17.93
chr3	19186666	19188691	AT3G51730_	.	+	77.61	26.3
chr5	19869017	19870329	AT5G49015_	.	+	58.82	19.94
chr3	23037094	23037797	AT3G62250_UBQ5	.	+	164.89	55.91
chr3	19955344	19956361	AT3G53890_	.	-	75.68	25.66
chr5	5799905	5801244	AT5G17600_	.	-	68.96	23.4
chr2	17886427	17889050	AT2G43010_AtPIF4,PIF4,SRL2	.	+	47.01	15.95
chr3	15986864	15989103	AT3G44310_ATNIT1,NIT1,NITI	.	+	61.8	20.98
chr1	19896027	19897442	AT1G53330_	.	+	69.37	23.56
chr4	17442612	17443855	AT4G37000_ACD2,ATRCCR	.	+	78.41	26.66
chr2	1071594	1073566	AT2G03530_ATUPS2,UPS2	.	+	43.2	14.69
chr1	27862909	27864193	AT1G74090_ATSOT18,ATST5B,SOT18	.	+	85.83	29.2
chr5	10314118	10317160	AT5G28340_	.	+	0.46	0.15
chr1	1336371	1337849	AT1G04770_	.	-	77.33	26.32
chr4	7654944	7656594	AT4G13170_	.	-	70.86	24.12
chr2	2587729	2588358	AT2G06520_PSBX	.	-	95.96	32.69
chr2	17923399	17923477	AT2G43139_	.	+	89.32	30.43
chr3	6553529	6555147	AT3G19000_	.	-	64.62	22.02
chr4	14391938	14393373	AT4G29190_AtC3H49,AtOZF2,AtTZF3,OZF2,TZF3	.	-	82.93	28.27
chr2	6272491	6273083	AT2G14660_	.	+	72	24.55
chr1	9748737	9752769	AT1G27980_ATDPL1,DPL1	.	+	54.23	18.49
chr3	5618440	5620873	AT3G16520_UGT88A1	.	-	69.28	23.63
chr5	8157551	8160229	AT5G24120_ATSIG5,SIG5,SIGE	.	-	65.38	22.32
chr5	20795936	20796051	AT5G51174_SNOR30	.	+	85.44	29.19
chr5	24317437	24317935	AT5G60460_	.	-	61.03	20.85
chr2	13824794	13826986	AT2G32560_	.	+	57.58	19.68
chr1	13026238	13027684	AT1G35420_	.	+	82.66	28.27
chr1	2223691	2225452	AT1G07240_UGT71C5	.	+	52.08	17.81
chr5	23310284	23311564	AT5G57565_	.	+	34.51	11.8
chr3	5692738	5694127	AT3G16720_ATL2,TL2	.	+	56.3	19.26
chr5	2265256	2266967	AT5G07220_ATBAG3,BAG3	.	-	57.35	19.62
chr5	20371853	20373441	AT5G50100_	.	+	68.33	23.39
chr1	7444931	7447549	AT1G21270_WAK2	.	+	64.24	21.99
chr4	18071884	18073182	AT4G38680_ATCSP2,CSDP2,CSP2,GRP2	.	-	102.58	35.12
chr1	8482013	8483875	AT1G23970_	.	-	50.04	17.13
chr1	21404408	21405956	AT1G57790_	.	-	71.47	24.47
chr1	8006195	8007428	AT1G22640_ATMYB3,MYB3	.	+	69.44	23.78
chr3	22735663	22738126	AT3G61440_ARATH;BSAS3;1,ATCYSC1,CYSC1	.	+	84.06	28.79
chr3	7084806	7086805	AT3G20310_ATERF-7,ATERF7,ERF7	.	-	91.79	31.45
chr3	19505629	19506932	AT3G52590_EMB2167,ERD16,HAP4,UBQ1	.	+	104.06	35.67
chr1	10053617	10055731	AT1G28610_	.	-	47.34	16.23
chr1	21902284	21905685	AT1G59620_CW9	.	+	45.91	15.74
chr3	9307254	9307967	AT3G25600_	.	+	38.12	13.07
chr5	26176021	26177917	AT5G65480_CCI1	.	+	61.98	21.26
chr5	24988456	24990009	AT5G62220_ATGT18,GT18,XLT2	.	-	86.11	29.54
chr3	22268746	22270006	AT3G60245_	.	+	95.06	32.62
chr1	6211873	6213444	AT1G18060_	.	-	57.35	19.68
chr5	22667235	22669545	AT5G55970_	.	+	64.66	22.19
chr5	14933336	14935841	AT5G37600_ATGLN1;1,ATGSR1,GLN1;1,GSR	.	-	63.64	21.84
chr3	21404574	21405217	AT3G57785_	.	-	114.16	39.22
chr5	15858400	15859788	AT5G39610_ANAC092,ATNAC2,ATNAC6,NAC2,NAC6,ORE1	.	-	54.96	18.88
chr3	3777895	3779506	AT3G11940_AML1,ATRPS5A,RPS5A	.	-	103.23	35.48
chr5	22308271	22309410	AT5G54940_	.	-	83.42	28.69
chr1	8478407	8480316	AT1G23960_	.	-	59.37	20.42
chr1	8385251	8386426	AT1G23710_	.	+	78.65	27.07
chr5	2407401	2409066	AT5G07620_	.	-	48.76	16.78
chr2	8855358	8857756	AT2G20570_ATGLK1,GLK1,GPRI1	.	+	72.06	24.83
chr3	23090944	23091566	AT3G62410_CP12,CP12-2	.	+	80.3	27.68
chr5	1867197	1868244	AT5G06165_	.	-	55.87	19.26
chr5	18983870	18984759	AT5G46790_PYL1,RCAR12	.	-	76.5	26.38
chr2	13909423	13910910	AT2G32795_	.	+	69.09	23.84
chr4	10896679	10899141	AT4G20170_GALS3	.	+	84.18	29.06
chr3	4078651	4079608	AT3G12830_SAUR72	.	-	75.69	26.13
chr5	7826732	7828724	AT5G23240_DJC76	.	-	51.04	17.62
chr4	10861455	10864696	AT4G20070_AAH,ATAAH	.	+	59.83	20.66
chr1	28212395	28212474	AT1G75163_	.	+	76.62	26.46
chr5	19462658	19464957	AT5G48020_	.	-	63.89	22.07
chr5	15377173	15378416	AT5G38410_RBCS3B	.	-	36.83	12.72
chr3	9781983	9783412	AT3G26612_	.	+	66.29	22.9
chr1	621461	622469	AT1G02816_	.	+	102.61	35.46
chr3	10902647	10904458	AT3G28900_	.	-	79.43	27.46
chr5	10940033	10941771	AT5G28919_	.	+	57.66	19.94
chr1	19981385	19981495	AT1G53541_	.	-	54.22	18.75
chr4	13725546	13727353	AT4G27440_PORB	.	+	55.86	19.32
chr3	4290082	4291595	AT3G13277_	.	+	61.05	21.12
chr5	208937	210445	AT5G01530_LHCB4.1	.	+	110.29	38.16
chr4	7289192	7290902	AT4G12250_GAE5	.	-	74.74	25.86
chr1	270956	272061	AT1G01730_	.	+	66.41	22.99
chr1	4608196	4610647	AT1G13440_GAPC-2,GAPC2	.	-	73.74	25.53
chr3	20065665	20066560	AT3G54200_	.	+	67.73	23.45
chr3	20132886	20133750	AT3G54366_	.	+	39.17	13.56
chr5	16829151	16831239	AT5G42100_ATBG_PPAP,BG_PPAP	.	-	104.8	36.3
chr1	1165165	1166768	AT1G04350_	.	+	69.12	23.97
chr4	18151687	18152569	AT4G38932_	.	-	24.46	8.48
chr2	15352491	15355177	AT2G36630_	.	-	60.94	21.14
chr1	6969107	6970956	AT1G20100_	.	-	85.75	29.78
chr2	9657344	9660776	AT2G22720_	.	+	55.92	19.42
chr5	3733654	3735099	AT5G11600_	.	-	67.86	23.57
chr3	2392287	2393778	AT3G07500_	.	+	65.72	22.83
chr4	13332834	13332911	AT4G26365_	.	-	35.56	12.35
chr2	12928767	12929737	AT2G30330_BLOS1	.	-	89.97	31.26
chr1	28327886	28329764	AT1G75460_	.	+	88.1	30.62
chr5	23355464	23356989	AT5G57660_ATCOL5,BBX6,COL5	.	+	61.59	21.42
chr1	3530467	3531842	AT1G10657_	.	+	46.26	16.09
chr3	23168061	23169187	AT3G62650_	.	+	51.96	18.08
chr5	5356605	5358511	AT5G16370_AAE5	.	-	60.52	21.06
chr5	19897370	19899114	AT5G49100_	.	-	65.13	22.67
chr1	27137181	27139384	AT1G72130_	.	+	49.84	17.35
chr3	11191491	11192986	AT3G29240_	.	+	80.99	28.2
chr2	15722568	15725062	AT2G37450_UMAMIT13	.	-	51.27	17.85
chr1	1291314	1291995	AT1G04635_AtPOP5,EMB1687,POP5	.	+	99.66	34.71
chr4	16553390	16554740	AT4G34680_GATA3	.	+	65.99	22.99
chr4	7617561	7619616	AT4G13050_	.	+	65.98	22.99
chr5	15620066	15622486	AT5G39030_	.	+	61.62	21.48
chr1	27991165	27993006	AT1G74470_	.	+	109.88	38.31
chr4	7536975	7538276	AT4G12850_	.	+	46.9	16.35
chr1	1645875	1647162	AT1G05562_	.	+	72.67	25.35
chr3	18166769	18168692	AT3G49010_ATBBC1,BBC1,RSU2	.	-	84.84	29.6
chr1	10074507	10076344	AT1G28670_ARAB-1	.	-	62.02	21.64
chr4	9876238	9880254	AT4G17770_ATTPS5,TPS5,TPS5	.	+	56.17	19.6
chr3	10285657	10287775	AT3G27770_	.	-	60.77	21.21
chr3	21889571	21891915	AT3G59210_	.	+	49.81	17.39
chr4	10162953	10165562	AT4G18390_TCP2,TCP2	.	-	51.02	17.83
chr1	28550409	28551781	AT1G76090_SMT3	.	-	71.51	25.01
chr3	3583883	3585790	AT3G11410_AHG3,ATPP2CA,PP2CA	.	-	95.32	33.34
chr3	8685873	8687677	AT3G24050_GATA1	.	+	39.86	13.94
chr3	19277778	19281346	AT3G51950_	.	-	61.39	21.49
chr1	9782996	9783998	AT1G28070_	.	+	49.7	17.4
chr5	7083965	7084734	AT5G20885_	.	-	116.71	40.88
chr1	2187621	2188417	AT1G07128_	.	-	50.74	17.77
chr1	4461806	4463543	AT1G13090_CYP71B28	.	+	92.01	32.24
chr5	26122989	26126439	AT5G65380_	.	-	46.8	16.4
chr1	26450245	26451945	AT1G70230_AXY4,TBL27	.	+	44.02	15.43
chr1	27688123	27690307	AT1G73650_	.	-	74.25	26.04
chr4	11334402	11335773	AT4G21280_PSBQ,PSBQ-1,PSBQA	.	+	93.49	32.8
chr5	1964468	1967335	AT5G06440_	.	-	61.19	21.47
chr1	3442327	3443957	AT1G10470_ARR4,ATRR1,IBC7,MEE7	.	-	62.34	21.88
chr1	17854813	17855715	AT1G48320_DHNAT1	.	-	82.7	29.03
chr2	15052199	15053275	AT2G35830_	.	+	52.41	18.4
chr3	1086877	1089229	AT3G04140_	.	+	74.93	26.31
chr4	381788	382643	AT4G00895_	.	+	88.47	31.07
chr5	9958090	9961264	AT5G27930_	.	-	41.95	14.73
chr3	16913448	16914131	AT3G46030_HTB11	.	-	118.21	41.52
chr2	15997114	15998906	AT2G38180_	.	+	49.47	17.38
chr2	18320732	18321696	AT2G44360_	.	-	54.05	18.99
chr5	26660600	26662894	AT5G66770_	.	+	92.39	32.47
chr4	12909575	12911580	AT4G25170_	.	+	49.94	17.56
chr4	1603702	1604508	AT4G03600_	.	-	59.86	21.05
chr1	8725883	8727212	AT1G24625_ZFP7	.	-	63.13	22.21
chr3	20430114	20431470	AT3G55120_A11,AtCHI,CFI,CHI,TT5	.	-	68.26	24.02
chr2	8704024	8706900	AT2G20180_PIF1,PIL5	.	-	58.19	20.48
chr3	8476571	8477392	AT3G23605_	.	+	58.07	20.44
chr2	19165403	19166949	AT2G46680_ATHB-7,ATHB7,HB-7	.	-	63.04	22.19
chr1	5867635	5869356	AT1G17160_	.	+	76.59	26.97
chr1	20674783	20676449	AT1G55370_NDF5	.	+	48.25	16.99
chr4	11545926	11546434	AT4G21740_	.	+	50.13	17.66
chr5	24279897	24282397	AT5G60360_AALP,ALP,SAG2	.	+	90.87	32.02
chr5	4631891	4633713	AT5G14370_	.	-	103.27	36.4
chr3	18800380	18801587	AT3G50630_ICK2,KRP2	.	+	69.67	24.56
chr5	22192499	22194308	AT5G54630_	.	-	59.99	21.15
chr5	1592130	1593026	AT5G05380_PRA1.B3	.	+	88.09	31.07
chr4	12220743	12222371	AT4G23400_PIP1;5,PIP1D	.	+	54.3	19.16
chr2	11774852	11774923	AT2G27560_	.	-	24.21	8.54
chr3	3186314	3188205	AT3G10300_	.	+	70.76	24.98
chr1	842747	844190	AT1G03400_	.	-	63.22	22.32
chr5	8610537	8611694	AT5G24990_	.	+	34.95	12.34
chr1	28299792	28302603	AT1G75410_BLH3	.	-	71.01	25.08
chr5	737590	740016	AT5G03140_LecRK-VIII.2	.	-	61.82	21.84
chr3	2117347	2118007	AT3G06700_	.	-	118.64	41.94
chr2	9526095	9527830	AT2G22430_ATHB6,HB6	.	-	62.51	22.1
chr2	14793651	14795629	AT2G35100_ARAD1	.	-	59.99	21.21
chr2	16464414	16466941	AT2G39435_TRM18	.	-	50.03	17.69
chr5	23500061	23501209	AT5G58070_ATTIL,TIL	.	-	75.08	26.56
chr5	23060872	23062311	AT5G56990_	.	-	59.73	21.13
chr5	533106	534656	AT5G02450_	.	+	64.4	22.79
chr1	24737719	24739353	AT1G66345_	.	+	50.72	17.95
chr4	13826374	13827823	AT4G27700_	.	-	93.65	33.15
chr1	24036021	24037401	AT1G64680_	.	+	93.48	33.1
chr2	7971017	7972081	AT2G18350_AtHB24,HB24,ZHD6	.	-	42.82	15.16
chr3	3623457	3624940	AT3G11510_	.	-	94.75	33.56
chr4	793261	795139	AT4G01840_ATKCO5,ATTPK5,KCO5,TPK5	.	+	85.68	30.36
chr1	6461232	6461752	AT1G18735_	.	-	67.48	23.91
chr4	15944322	15947026	AT4G33050_AtIQM1,EDA39,IQM1	.	-	56.33	19.96
chr3	7626757	7629151	AT3G21670_AtNPF6.4,NPF6.4	.	-	60.23	21.35
chr4	7480641	7482150	AT4G12690_	.	+	43.04	15.26
chr2	13138997	13140245	AT2G30860_ATGSTF7,ATGSTF9,GLUTTR,GSTF9	.	+	68.82	24.41
chr2	18129435	18132637	AT2G43750_ACS1,ATCS-B,CPACS1,OASB	.	-	62.77	22.28
chr1	25262159	25263789	AT1G67430_	.	+	94.8	33.67
chr3	22415835	22417158	AT3G60640_ATG8G	.	+	51.35	18.24
chr5	4427783	4429133	AT5G13720_	.	+	69.18	24.58
chr5	18907523	18907594	AT5G46595_	.	+	3.31	1.17
chr3	22805180	22806527	AT3G61630_CRF6	.	+	52.32	18.59
chr5	24288658	24291020	AT5G60390_	.	+	69.56	24.72
chr5	9617486	9618481	AT5G27280_	.	+	95.18	33.83
chr5	17457125	17458797	AT5G43450_	.	-	64.49	22.92
chr4	9933366	9935586	AT4G17880_MYC4	.	-	87.51	31.11
chr4	1122603	1122678	AT4G02555_	.	+	45.2	16.08
chr2	10223945	10224630	AT2G24040_	.	+	40	14.23
chr2	5539240	5541358	AT2G13360_AGT,AGT1,SGAT	.	-	65.31	23.24
chr5	4776943	4779494	AT5G14780_FDH	.	+	49.84	17.74
chr5	17560179	17562929	AT5G43730_RSG2	.	+	51.66	18.39
chr5	25069093	25070934	AT5G62430_CDF1	.	-	44.61	15.88
chr3	9302010	9303615	AT3G25590_	.	+	59.76	21.29
chr3	9528774	9530496	AT3G26080_	.	+	79.5	28.33
chr4	8241732	8243910	AT4G14320_	.	-	58.09	20.7
chr1	4394897	4396291	AT1G12910_ATAN11,LWD1	.	-	93.98	33.5
chr4	14200903	14202681	AT4G28740_	.	+	76.93	27.43
chr3	8350803	8353959	AT3G23340_ckl10	.	+	41.84	14.92
chr4	17616659	17618473	AT4G37470_KAI2	.	-	57.64	20.56
chr1	2011885	2013545	AT1G06570_HPD,HPPD,PDS1	.	-	97.29	34.71
chr1	17179302	17180806	AT1G45474_Lhca5	.	+	96.83	34.55
chr5	1493719	1495085	AT5G05060_	.	-	41.73	14.89
chr2	19556624	19557139	AT2G47720_	.	+	49.85	17.79
chr1	27303366	27304850	AT1G72510_	.	+	47.02	16.78
chr5	5581658	5584029	AT5G16990_	.	-	39.62	14.14
chr1	11133410	11134844	AT1G31170_ATSRX,SRX	.	+	81.6	29.14
chr1	225665	227302	AT1G01620_PIP1;3,PIP1C,TMP-B	.	-	55.22	19.72
chr1	11685060	11685144	AT1G32385_	.	+	68.88	24.6
chr5	9941905	9944778	AT5G27920_	.	-	52.24	18.66
chr5	6814093	6815379	AT5G20190_	.	+	125.03	44.67
chr5	19183601	19185644	AT5G47240_atnudt8,NUDT8	.	+	43.81	15.65
chr3	8979284	8979423	AT3G24614_	.	-	53.65	19.18
chr1	15977014	15979952	AT1G42550_PMI1	.	+	66.47	23.77
chr5	26921672	26921743	AT5G67455_	.	+	7.37	2.63
chr1	6457821	6459751	AT1G18720_	.	-	63.98	22.91
chr2	1823240	1824425	AT2G05100_LHCB2,LHCB2.1	.	-	48.17	17.25
chr4	18484901	18486814	AT4G39840_	.	+	79.64	28.53
chr3	18003913	18004974	AT3G48570_	.	-	55.21	19.78
chr2	14529608	14530958	AT2G34460_	.	+	96.78	34.68
chr4	10303414	10304576	AT4G18740_	.	-	61.06	21.88
chr4	18484875	18486365	AT4G39838_	.	-	93.25	33.42
chr3	3533255	3534847	AT3G11280_	.	-	64.71	23.19
chr5	7650582	7651776	AT5G22875_	.	+	60.19	21.58
chr3	5356601	5358593	AT3G15840_PIFI	.	-	57.76	20.72
chr1	17451680	17454421	AT1G47530_	.	+	57.56	20.65
chr1	5138334	5139432	AT1G14900_HMGA	.	-	85.58	30.72
chr1	12168768	12172005	AT1G33560_ADR1	.	+	51.46	18.47
chr5	14641551	14642440	AT5G37055_ATSWC6,SEF	.	-	72.99	26.21
chr3	18806258	18808210	AT3G50650_	.	-	71.62	25.73
chr1	20673983	20674363	AT1G55365_	.	-	84.25	30.27
chr4	12171103	12173925	AT4G23270_CRK19	.	+	55.5	19.94
chr5	5899253	5900932	AT5G17850_	.	+	47.9	17.21
chr2	2199219	2201486	AT2G05790_	.	+	64.23	23.08
chr4	11445849	11447163	AT4G21510_AtFBS2,FBS2	.	-	53.34	19.17
chr2	11816634	11817867	AT2G27710_	.	+	87.24	31.36
chr1	6123701	6125269	AT1G17780_	.	+	55.77	20.07
chr1	6460598	6462224	AT1G18730_NDF6,PnsB4	.	+	57.18	20.58
chr3	17569505	17570567	AT3G47650_	.	+	58.89	21.2
chr5	14233110	14235151	AT5G36160_	.	-	82.05	29.54
chr1	19760001	19761452	AT1G53030_	.	-	44.78	16.12
chr1	9996824	10000447	AT1G28440_HSL1	.	+	77.46	27.9
chr5	17798369	17800824	AT5G44190_ATGLK2,GLK2,GPRI2	.	+	57.65	20.77
chr5	3241518	3242266	AT5G10310_	.	-	49.6	17.87
chr4	8520832	8521456	AT4G14890_FdC1	.	+	121.04	43.62
chr1	27398591	27400417	AT1G72810_	.	-	67.51	24.33
chr3	20016892	20018822	AT3G54050_HCEF1	.	+	99.14	35.74
chr3	21872706	21874735	AT3G59150_	.	+	62.08	22.38
chr5	1373530	1374787	AT5G04760_	.	-	84.09	30.32
chr5	3055779	3057447	AT5G09820_	.	-	57.87	20.87
chr4	9593529	9595249	AT4G17060_FIP2	.	-	70.82	25.56
chr5	21260278	21261287	AT5G52370_	.	-	62	22.38
chr1	28313487	28315122	AT1G75440_UBC16	.	+	63.37	22.88
chr2	6052332	6053994	AT2G14285_	.	-	58.08	20.97
chr5	3464218	3465687	AT5G10960_	.	+	123.03	44.45
chr2	14440648	14442005	AT2G34200_	.	+	63.37	22.9
chr5	24638773	24640600	AT5G61270_PIF7	.	-	61.34	22.17
chr1	10071712	10073411	AT1G28660_	.	-	41.12	14.86
chr2	12329488	12329995	AT2G28740_HIS4	.	-	77.7	28.09
chr1	6676234	6677673	AT1G19310_	.	-	73.55	26.59
chr4	12138137	12140921	AT4G23180_CRK10,RLK4	.	+	66.44	24.02
chr5	14998854	14999619	AT5G37770_CML24,TCH2	.	-	62.61	22.64
chr1	24655210	24657683	AT1G66200_ATGSR2,GLN1;2,GSR2	.	-	54.84	19.84
chr5	9873152	9874598	AT5G27850_	.	+	99.93	36.16
chr1	30156826	30157584	AT1G80180_	.	-	61.3	22.18
chr4	9538798	9544467	AT4G16950_RPP5	.	-	35.54	12.86
chr4	8005032	8007510	AT4G13810_AtRLP47,RLP47	.	-	50.55	18.3
chr1	6463922	6465476	AT1G18740_	.	+	92.91	33.67
chr3	2946406	2948995	AT3G09600_LCL5,RVE8	.	+	81.18	29.42
chr5	8794252	8797020	AT5G25350_EBF2	.	-	82.78	30.02
chr4	5375874	5377056	AT4G08455_	.	+	78.42	28.45
chr3	16897287	16898013	AT3G45980_H2B,HTB9	.	-	88.41	32.08
chr1	20666222	20668726	AT1G55360_	.	-	60.14	21.83
chr4	7824034	7827004	AT4G13460_SDG22,SET22,SUVH9	.	-	68.07	24.71
chr3	21381054	21383629	AT3G57680_	.	+	56.84	20.64
chr1	3093839	3094864	AT1G09560_GLP5,PDGLP1	.	+	66.57	24.18
chr4	6276998	6278509	AT4G10040_CYTC-2	.	+	86.75	31.52
chr1	28932162	28935550	AT1G76990_ACR3	.	+	56.26	20.44
chr2	1618936	1620336	AT2G04630_NRPB6B,NRPE6B	.	-	69.66	25.31
chr1	73931	74737	AT1G01170_	.	-	44.29	16.09
chr3	541715	543385	AT3G02560_	.	+	75.21	27.33
chr5	6090049	6090761	AT5G18380_	.	-	122.77	44.62
chr5	530822	530895	AT5G02435_	.	+	13.91	5.05
chr1	2412980	2413708	AT1G07790_HTB1	.	+	81.31	29.56
chr2	13644395	13645829	AT2G32090_	.	+	57.96	21.07
chr5	26871891	26874579	AT5G67360_ARA12	.	-	91.88	33.41
chr3	6616352	6617696	AT3G19150_ACK1,AtKRP6,ICK4,KRP6	.	-	41.59	15.12
chr2	12582519	12584101	AT2G29260_	.	+	57.33	20.85
chr2	16745653	16747400	AT2G40100_LHCB4.3	.	+	46.84	17.04
chr3	9630200	9632009	AT3G26280_CYP71B4	.	-	55.88	20.33
chr2	19554834	19556065	AT2G47710_	.	-	79.92	29.08
chr4	18559784	18560657	AT4G40045_	.	-	45.42	16.53
chr4	12060131	12062858	AT4G23010_ATUTR2,UTR2	.	-	61.57	22.41
chr1	24811149	24812650	AT1G66500_	.	-	71.5	26.03
chr1	3874437	3875484	AT1G11530_ATCXXS1,CXXS1	.	+	49.82	18.14
chr5	25900559	25902127	AT5G64780_	.	-	69.94	25.47
chr3	9603889	9607192	AT3G26240_	.	-	54.28	19.77
chr2	18839586	18841403	AT2G45740_PEX11D	.	+	66.45	24.21
chr3	16733755	16735951	AT3G45600_TET3	.	-	46.28	16.86
chr3	19084035	19085858	AT3G51420_ATSSL4,SSL4	.	+	74.27	27.07
chr4	1527716	1528057	AT4G03443_	.	+	48.76	17.77
chr4	7613316	7615386	AT4G13040_	.	+	61.69	22.49
chr2	174271	175617	AT2G01400_	.	+	74.42	27.14
chr2	11706198	11708065	AT2G27360_	.	+	50.03	18.25
chr2	15814718	15817004	AT2G37710_LecRK-IV.1,RLK	.	-	93.18	34.03
chr1	6680563	6683533	AT1G19330_	.	-	45.87	16.75
chr5	5359363	5360710	AT5G16380_	.	-	69.05	25.22
chr3	19912494	19913033	AT3G53730_	.	-	57	20.82
chr4	6221664	6224134	AT4G09900_ATMES12,MES12	.	-	47.66	17.41
chr2	17141275	17142457	AT2G41120_	.	-	84.11	30.73
chr5	6739624	6740957	AT5G19940_	.	+	106.85	39.04
chr2	18280623	18282876	AT2G44210_	.	+	63.61	23.24
chr1	28250075	28251350	AT1G75270_DHAR2	.	-	67.67	24.74
chr2	11091334	11093168	AT2G26030_	.	-	64.84	23.71
chr1	9158380	9159897	AT1G26500_	.	+	53.85	19.7
chr5	10477771	10479384	AT5G28500_	.	+	84.75	31.02
chr5	18138775	18142147	AT5G44930_ARAD2	.	-	47.78	17.49
chr2	9076437	9077048	AT2G21185_	.	-	58.18	21.3
chr2	13208667	13208918	AT2G31035_	.	+	17.49	6.4
chr1	9483157	9484368	AT1G27300_	.	+	69.28	25.37
chr3	2605442	2607787	AT3G08580_AAC1	.	-	73.08	26.78
chr5	3410539	3412633	AT5G10790_UBP22	.	+	65.24	23.91
chr3	17707918	17708909	AT3G47965_	.	-	29.8	10.92
chr4	18083395	18084251	AT4G38740_ROC1	.	-	63.66	23.34
chr1	16468044	16470500	AT1G43670_AtcFBP,FBP,FINS1	.	+	47.26	17.33
chr3	3233715	3235289	AT3G10405_	.	-	54.62	20.03
chr5	23340847	23343258	AT5G57630_CIPK21,SnRK3.4	.	-	38.66	14.18
chr1	2927703	2928968	AT1G09070_(AT)SRC2,AtSRC2,SRC2	.	+	103.79	38.08
chr3	7522804	7524580	AT3G21360_	.	+	61.71	22.64
chr3	5269849	5271922	AT3G15570_	.	-	47.15	17.3
chr2	16011456	16012508	AT2G38230_ATPDX1.1,PDX1.1	.	+	63.79	23.41
chr3	19168850	19171150	AT3G51670_	.	+	54.98	20.18
chr4	1229111	1229945	AT4G02770_PSAD-1	.	-	116.83	42.89
chr4	9670881	9673417	AT4G17250_	.	+	64.83	23.8
chr1	2640813	2641828	AT1G08380_PSAO	.	-	66.68	24.48
chr5	4937579	4939007	AT5G15210_ATHB30,HB30,ZFHD3,ZHD8	.	-	74.08	27.2
chr5	25778169	25778922	AT5G64480_	.	+	78.48	28.82
chr1	11532533	11534639	AT1G32060_PRK	.	+	77.85	28.59
chr1	26228632	26231339	AT1G69730_	.	-	59.08	21.7
chr4	9043712	9045599	AT4G15955_	.	-	67.66	24.86
chr3	21078297	21079856	AT3G56950_SIP2,SIP2;1	.	-	59.91	22.02
chr1	25756600	25757563	AT1G68585_	.	+	51.53	18.94
chr5	23734376	23735634	AT5G58770_AtcPT4,cPT4	.	+	54.65	20.09
chr4	12571766	12573725	AT4G24240_ATWRKY7,WRKY7	.	+	55.55	20.43
chr2	10451419	10451511	AT2G24592_	.	+	56.61	20.84
chr4	2741160	2742949	AT4G05400_	.	+	77.24	28.44
chr3	9795071	9797045	AT3G26650_GAPA,GAPA-1	.	+	90.41	33.31
chr1	22718705	22719516	AT1G61570_TIM13	.	-	84.6	31.17
chr4	827237	828607	AT4G01915_	.	+	65.33	24.07
chr1	4392450	4394400	AT1G12900_GAPA-2	.	-	85.8	31.63
chr5	7168184	7170928	AT5G21100_	.	+	51.06	18.83
chr1	23450654	23452311	AT1G63230_	.	+	49.1	18.11
chr1	26089202	26090386	AT1G69410_ATELF5A-3,ELF5A-3	.	+	54.91	20.26
chr2	16437472	16440154	AT2G39360_	.	-	50.97	18.81
chr5	21881142	21883416	AT5G53900_	.	-	46.09	17.01
chr5	6896576	6898783	AT5G20410_ATMGD2,MGD2	.	+	45.9	16.94
chr2	9976746	9978021	AT2G23430_ICK1,KRP1	.	-	28.26	10.43
chr5	6728160	6730045	AT5G19900_	.	-	91.73	33.87
chr1	2989378	2990357	AT1G09250_AIF4	.	+	57.61	21.28
chr1	23252313	23253743	AT1G62790_	.	+	39.31	14.52
chr3	2916952	2918108	AT3G09500_	.	+	91.36	33.76
chr5	23167842	23170999	AT5G57180_CIA2	.	+	42.73	15.79
chr1	8525435	8527087	AT1G24100_UGT74B1	.	-	74.82	27.66
chr1	28925798	28927339	AT1G76980_	.	-	63.97	23.65
chr3	5644698	5645414	AT3G16570_ATRALF23,RALF23	.	+	64.58	23.88
chr1	12010901	12012524	AT1G33120_	.	+	41.3	15.27
chr1	23181463	23183227	AT1G62610_	.	-	28.59	10.57
chr1	10090769	10090840	AT1G28750_	.	+	39.86	14.75
chr3	9475350	9477460	AT3G25890_CRF11	.	+	97.06	35.93
chr5	15878699	15881044	AT5G39660_CDF2	.	+	55.28	20.47
chr3	7194846	7195736	AT3G20600_NDR1	.	+	52.93	19.61
chr4	17388814	17389837	AT4G36900_DEAR4,RAP2.10	.	+	51.54	19.1
chr2	1123390	1123461	AT2G03700_	.	-	10.56	3.91
chr1	11920390	11923766	AT1G32900_GBSS1	.	-	57.45	21.3
chr4	735753	736604	AT4G01710_ARPC5,CRK	.	+	77.02	28.56
chr5	25051978	25054289	AT5G62390_ATBAG7,BAG7	.	-	73.69	27.33
chr1	8049100	8050708	AT1G22740_ATRABG3B,RAB7,RAB75,RABG3B	.	+	38.23	14.18
chr1	154492	156011	AT1G01420_UGT72B3	.	-	71.02	26.37
chr3	208439	210137	AT3G01520_	.	+	72.16	26.8
chr5	5260604	5262840	AT5G16110_	.	-	84.3	31.31
chr3	16569051	16569827	AT3G45230_APAP1	.	+	69.09	25.66
chr5	21281773	21282806	AT5G52420_	.	+	62.72	23.3
chr1	10247780	10249594	AT1G29300_UNE1	.	-	49.91	18.54
chr3	16912344	16913350	AT3G46020_	.	-	53.59	19.91
chr5	3181983	3183865	AT5G10150_	.	-	60.1	22.33
chr5	26421855	26423240	AT5G66070_	.	+	51.3	19.06
chr4	1556888	1557319	AT4G03505_	.	-	25.49	9.47
chr4	18517409	18518052	AT4G39925_	.	-	40.17	14.93
chr1	20439434	20441159	AT1G54780_AtTLP18.3,TLP18.3	.	+	85.59	31.83
chr2	14041038	14043358	AT2G33110_ATVAMP723,VAMP723,VAMP723	.	-	52.85	19.66
chr2	15168862	15168935	AT2G36140_	.	+	62.04	23.08
chr3	20810309	20813036	AT3G56080_	.	-	60.8	22.62
chr1	25493196	25495988	AT1G68010_ATHPR1,HPR	.	+	69.52	25.87
chr5	20151163	20151842	AT5G49640_	.	+	58.65	21.83
chr3	5506931	5508414	AT3G16250_NDF4,PnsB3	.	-	37.99	14.14
chr1	21938367	21940184	AT1G59710_	.	+	73.89	27.53
chr1	4528623	4530063	AT1G13250_GATL3	.	-	72.73	27.1
chr1	19052193	19053534	AT1G51402_	.	+	51.38	19.15
chr4	1092002	1092484	AT4G02482_	.	+	60.95	22.72
chr5	16757951	16758718	AT5G41860_	.	+	77.24	28.8
chr1	4888214	4889661	AT1G14320_RPL10,RPL10A,SAC52	.	+	88.09	32.85
chr3	11006753	11007977	AT3G29010_	.	+	53.44	19.93
chr5	2457347	2458430	AT5G07730_	.	-	85.03	31.72
chr5	21128129	21130090	AT5G52030_	.	+	59.59	22.23
chr3	22028774	22030445	AT3G59640_	.	+	60.38	22.53
chr5	19676117	19678109	AT5G48545_HINT3	.	+	75.43	28.15
chr3	8108021	8108622	AT3G22886_MIR167A	.	+	52.35	19.54
chr3	1033768	1034906	AT3G03990_	.	+	56.43	21.07
chr5	21427947	21429447	AT5G52870_MAKR5	.	-	62.76	23.44
chr1	6773302	6774528	AT1G19570_ATDHAR1,DHAR1,DHAR5	.	-	65.24	24.37
chr2	17269232	17270542	AT2G41430_CID1,ERD15,LSR1	.	+	74.9	28.01
chr1	26704130	26705236	AT1G70810_	.	+	36.93	13.82
chr3	6803072	6804233	AT3G19580_AZF2,ZF2	.	-	47.1	17.63
chr5	9984051	9987990	AT5G27950_	.	+	40.95	15.33
chr4	6547786	6548864	AT4G10600_	.	-	64.42	24.12
chr5	15421573	15423431	AT5G38520_	.	+	52.15	19.53
chr1	8321680	8324240	AT1G23440_	.	+	63.86	23.92
chr3	6180859	6182854	AT3G18050_	.	+	55.33	20.73
chr2	15515133	15516931	AT2G36950_	.	+	48.76	18.28
chr4	1511839	1514030	AT4G03420_	.	+	42.17	15.81
chr2	10609413	10612232	AT2G24945_	.	+	52.59	19.72
chr5	18697235	18700656	AT5G46110_APE2,TPT	.	+	55.7	20.89
chr4	148814	151686	AT4G00340_RLK4	.	+	63.03	23.64
chr2	12903236	12905198	AT2G30250_ATWRKY25,WRKY25	.	-	46.18	17.32
chr4	6308683	6309546	AT4G10100_CNX7,SIR5	.	+	80.21	30.09
chr2	18831161	18832211	AT2G45710_	.	+	62.29	23.37
chr5	15826089	15828035	AT5G39530_	.	-	48.18	18.08
chr4	7307737	7309755	AT4G12300_CYP706A4	.	-	59.44	22.31
chr4	15464905	15469204	AT4G31980_	.	+	45.9	17.23
chr2	10609394	10612232	AT2G24940_AtMAPR2,MAPR2	.	+	51.96	19.51
chr4	7231822	7234501	AT4G12070_	.	+	52.01	19.53
chr3	17902088	17902255	AT3G48344_	.	-	10.21	3.83
chr5	23244734	23246420	AT5G57370_	.	+	69.92	26.27
chr4	14982522	14983421	AT4G30760_	.	+	90.32	33.94
chr1	11410875	11412204	AT1G31812_ACBP,ACBP6	.	-	60.85	22.87
chr2	16474149	16476108	AT2G39460_ATRPL23A,RPL23A,RPL23A1,RPL23AA	.	+	63	23.68
chr3	5705662	5707023	AT3G16770_ATEBP,EBP,ERF72,RAP2.3	.	+	44.03	16.55
chr4	18124978	18125559	AT4G38840_SAUR14	.	-	56.42	21.21
chr2	1799234	1800392	AT2G05070_LHCB2,LHCB2.2	.	-	36.49	13.72
chr4	11179115	11180799	AT4G20880_	.	-	61.07	22.97
chr2	19415052	19415186	AT2G47275_MIR403	.	+	99.4	37.4
chr5	10862173	10864903	AT5G28840_GME	.	-	73.4	27.62
chr1	8003315	8004304	AT1G22630_	.	+	44.32	16.68
chr1	18314178	18316645	AT1G49480_RTV1	.	-	61.05	22.98
chr2	16507896	16510198	AT2G39570_ACR9	.	+	59.89	22.55
chr1	5639032	5640173	AT1G16500_	.	+	64.57	24.32
chr1	4713674	4715407	AT1G13740_AFP2	.	+	46.32	17.45
chr1	4877627	4879149	AT1G14280_PKS2	.	+	57.41	21.63
chr4	18571359	18573084	AT4G40060_ATHB-16,ATHB16,HB16	.	-	68.86	25.95
chr2	17135721	17136852	AT2G41090_	.	+	64.37	24.26
chr1	907642	909376	AT1G03630_POR,PORC	.	+	98.72	37.22
chr1	22409472	22410654	AT1G60870_MEE9	.	+	50.24	18.94
chr4	17679279	17681202	AT4G37630_CYCD5;1	.	+	52.23	19.7
chr1	26341801	26343126	AT1G69935_SHW1	.	-	100.98	38.1
chr3	16090564	16096359	AT3G44480_cog1,RPP1	.	-	31.25	11.79
chr4	16842188	16844082	AT4G35460_ATNTRB,NTR1,NTRB	.	+	54.9	20.72
chr5	22114304	22115472	AT5G54470_BBX29	.	-	43.69	16.49
chr4	17004595	17006287	AT4G35900_atbzip14,FD,FD-1	.	+	55.97	21.13
chr3	5795834	5796850	AT3G16990_	.	-	97.4	36.78
chr2	15042175	15043575	AT2G35795_	.	+	47.54	17.95
chr2	17295074	17296420	AT2G41475_	.	-	44.51	16.81
chr1	8050860	8052930	AT1G22750_	.	+	83.27	31.46
chr3	15512607	15517506	AT3G43600_AAO2,AO3,AOgamma,atAO-2,AtAO3	.	-	46.6	17.61
chr2	11512861	11513553	AT2G26975_COPT6	.	+	58.05	21.94
chr2	12405596	12408235	AT2G28890_PLL4	.	-	51.56	19.49
chr4	14007539	14009019	AT4G28270_ATRMA2,RMA2	.	-	56.77	21.47
chr5	1639032	1640606	AT5G05550_	.	-	74.28	28.11
chr1	23505557	23506504	AT1G63380_	.	+	30.37	11.49
chr5	2432263	2432335	AT5G07675_	.	-	13.67	5.17
chr1	18623698	18626395	AT1G50280_	.	-	38.03	14.4
chr3	21772813	21774743	AT3G58900_	.	+	56.56	21.42
chr1	28802633	28802734	AT1G76728_	.	+	24.43	9.26
chr4	1497536	1499865	AT4G03400_DFL2,GH3-10	.	-	55.55	21.07
chr3	4642280	4644301	AT3G14020_NF-YA6	.	+	61.68	23.4
chr5	7379199	7381935	AT5G22300_AtNIT4,NIT4	.	+	66.51	25.24
chr1	4776463	4779400	AT1G13960_WRKY4	.	+	61.6	23.38
chr5	15911416	15912830	AT5G39760_AtHB23,HB23,ZHD10	.	+	52.93	20.09
chr3	18504256	18504967	AT3G49910_	.	+	176.04	66.84
chr3	8016051	8017508	AT3G22660_	.	-	63.24	24.01
chr5	3479029	3480425	AT5G11000_	.	-	85.12	32.32
chr4	12937253	12938836	AT4G25270_OTP70	.	-	51.82	19.68
chr4	16386719	16388722	AT4G34230_ATCAD5,CAD-5,CAD5	.	-	51.55	19.59
chr5	1609250	1610446	AT5G05440_PYL5,RCAR8	.	+	58.81	22.35
chr1	21909175	21911201	AT1G59640_BPE,BPEp,BPEub,ZCW32	.	-	57.33	21.79
chr4	18389436	18390539	AT4G39600_	.	-	86.22	32.78
chr3	22810041	22810747	AT3G61640_AGP20,AtAGP20	.	-	43.77	16.64
chr1	29599349	29601682	AT1G78700_BEH4	.	+	63.14	24.02
chr5	10540460	10543375	AT5G28540_BIP1	.	-	57.95	22.05
chr3	5669373	5670842	AT3G16640_TCTP	.	-	82.97	31.58
chr3	22922210	22922321	AT3G61897_MIR166,MIR166B	.	+	28.2	10.73
chr5	6061699	6063148	AT5G18310_	.	+	37.13	14.13
chr1	20846908	20849054	AT1G55760_	.	-	58.85	22.4
chr4	14553315	14555167	AT4G29720_ATPAO5,PAO5	.	-	88.45	33.67
chr2	18046004	18047401	AT2G43460_	.	-	82.09	31.25
chr3	6556197	6558009	AT3G19010_	.	-	53.75	20.46
chr5	16688626	16693119	AT5G41740_	.	+	44.87	17.08
chr3	19755704	19757613	AT3G53280_CYP71B5	.	+	42.84	16.31
chr2	6810476	6812939	AT2G15620_ATHNIR,NIR,NIR1	.	+	55.44	21.11
chr5	16973304	16974574	AT5G42440_	.	-	73.81	28.11
chr4	17743887	17746678	AT4G37760_SQE3	.	+	62.48	23.8
chr2	15168541	15169514	AT2G36145_	.	+	60.55	23.07
chr4	16577404	16578452	AT4G34750_SAUR49	.	+	61.42	23.41
chr2	2287238	2289307	AT2G05940_RIPK	.	-	46.49	17.72
chr1	23499515	23502169	AT1G63360_	.	-	53.64	20.45
chr1	21439232	21440805	AT1G57980_	.	-	46.61	17.77
chr1	4915576	4918138	AT1G14370_APK2A,Kin1,PBL2	.	+	40.1	15.29
chr4	15346072	15347727	AT4G31700_RPS6,RPS6A	.	-	74.76	28.52
chr1	6799981	6802685	AT1G19660_AtBBD2,BBD2	.	-	62.02	23.66
chr1	24134085	24136109	AT1G64970_G-TMT,TMT1,VTE4	.	-	59.75	22.8
chr5	23818184	23820237	AT5G59000_	.	+	43.92	16.76
chr1	2879303	2879374	AT1G08950_	.	+	17.67	6.74
chr1	29815506	29819104	AT1G79270_ECT8	.	+	51.4	19.62
chr1	22551332	22554649	AT1G61180_	.	+	47.6	18.17
chr3	6714392	6716099	AT3G19380_PUB25	.	-	58.46	22.32
chr1	11416451	11418279	AT1G31820_PUT1	.	-	50.41	19.25
chr2	17616841	17619593	AT2G42290_	.	-	56.1	21.43
chr3	23295343	23296597	AT3G63030_MBD4	.	+	53.92	20.6
chr2	13778449	13781258	AT2G32450_	.	+	56.47	21.58
chr1	7346156	7346973	AT1G21010_	.	+	43.14	16.49
chr1	7489151	7490737	AT1G21390_emb2170	.	-	61.81	23.63
chr5	17360287	17363773	AT5G43270_SPL2	.	-	47.89	18.31
chr1	5469389	5471149	AT1G15920_	.	+	51.22	19.59
chr5	24834317	24836694	AT5G61820_	.	-	51.45	19.68
chr1	28873059	28875292	AT1G76890_AT-GT2,GT2	.	-	44.81	17.14
chr5	7856189	7858319	AT5G23340_	.	+	52.96	20.26
chr2	16303403	16305629	AT2G39050_ArathEULS3,EULS3	.	+	75.97	29.07
chr1	26687230	26688384	AT1G70760_CRR23,NdhL	.	+	51.22	19.6
chr3	19312718	19313466	AT3G52070_	.	+	68.92	26.38
chr3	3698839	3701493	AT3G11700_FLA18	.	+	87.96	33.68
chr5	5995479	5997498	AT5G18130_	.	+	54.71	20.95
chr5	589527	591677	AT5G02620_ANK1,ATANK1	.	+	67.5	25.85
chr2	15235723	15237728	AT2G36340_	.	+	55.72	21.34
chr4	17368965	17373930	AT4G36870_BLH2,SAW1	.	+	40.97	15.69
chr3	8003934	8005579	AT3G22590_CDC73,PHP	.	+	72.74	27.87
chr2	15088832	15092415	AT2G35940_BLH1,EDA29	.	-	52.32	20.05
chr4	11306945	11308742	AT4G21210_ATRP1,RP1	.	+	52.36	20.07
chr3	7376635	7377186	AT3G21055_PSBTN	.	-	107.51	41.23
chr4	841989	843459	AT4G01940_AtCNFU1,NFU1	.	-	80.75	30.97
chr5	17330945	17331646	AT5G43170_AZF3,ZF3	.	-	68.83	26.4
chr2	19438951	19440345	AT2G47370_	.	-	64.9	24.9
chr3	20104399	20106044	AT3G54290_	.	-	87.14	33.44
chr1	18112458	18113733	AT1G48960_	.	+	40.11	15.39
chr3	4377097	4379575	AT3G13440_	.	+	48.26	18.52
chr4	13388386	13390374	AT4G26520_AtFBA7,FBA7	.	+	58.97	22.64
chr2	631236	632575	AT2G02400_	.	-	45.16	17.34
chr1	12890423	12892874	AT1G35190_	.	+	43.46	16.69
chr4	8058072	8058675	AT4G13950_RALFL31	.	-	85.69	32.92
chr1	10670320	10672740	AT1G30290_	.	-	70.61	27.13
chr4	10071634	10073236	AT4G18197_ATPUP7,PEX17,PUP7	.	+	57.39	22.05
chr1	12357910	12358966	AT1G34000_OHP2	.	-	92.23	35.44
chr1	25746977	25747654	AT1G68568_	.	-	43.31	16.64
chr2	14568047	14568637	AT2G34585_	.	-	73.4	28.21
chr5	1519913	1522667	AT5G05140_	.	+	58.1	22.33
chr3	71626	73220	AT3G01210_	.	+	65.68	25.25
chr1	2437330	2439665	AT1G07890_APX1,ATAPX01,ATAPX1,CS1,MEE6	.	+	73.94	28.43
chr2	12776386	12779938	AT2G29970_SMXL7	.	+	59.43	22.85
chr5	5724759	5726746	AT5G17380_	.	-	70.78	27.22
chr1	26620923	26621659	AT1G70600_	.	-	161.48	62.12
chr3	8037216	8039903	AT3G22750_	.	-	36.22	13.93
chr4	10347582	10349562	AT4G18880_AT-HSFA4A,HSF	.	-	59.91	23.05
chr1	24127561	24129458	AT1G64950_CYP89A5	.	+	48.5	18.66
chr5	17526751	17530516	AT5G43630_TZP	.	+	58.6	22.55
chr5	26101939	26104614	AT5G65310_ATHB-5,ATHB5,HB5	.	-	44.16	17
chr3	20244389	20246080	AT3G54680_	.	+	100.26	38.63
chr1	229013	230917	AT1G01630_	.	+	41.4	15.95
chr4	14920534	14922494	AT4G30530_GGP1	.	+	46.24	17.82
chr5	5659574	5662865	AT5G17230_PSY	.	-	67.43	26
chr1	12051471	12054546	AT1G33240_AT-GTL1,ATGTL1,GTL1	.	-	55.49	21.4
chr2	14743475	14743548	AT2G34950_	.	-	8.31	3.2
chr1	24930040	24930551	AT1G66820_	.	+	22.46	8.66
chr3	6142129	6143310	AT3G17930_DAC	.	-	79.29	30.6
chr3	17867316	17868387	AT3G48240_	.	+	45.23	17.46
chr2	19138801	19140747	AT2G46620_	.	-	80.37	31.03
chr5	22315699	22316601	AT5G54980_	.	+	51.67	19.95
chr4	5839683	5842394	AT4G09160_	.	+	61.22	23.64
chr3	21261934	21262622	AT3G57450_	.	+	35.82	13.83
chr1	20414316	20415287	AT1G54690_G-H2AX,GAMMA-H2AX,H2AXB,HTA3	.	-	62.42	24.11
chr5	2940676	2941251	AT5G09445_	.	+	38.89	15.02
chr2	9236523	9237811	AT2G21580_	.	+	86.22	33.31
chr2	1094757	1096968	AT2G03590_ATUPS1,UPS1	.	+	34.53	13.34
chr2	15069997	15071653	AT2G35900_	.	-	60.94	23.55
chr1	27639091	27640529	AT1G73500_ATMKK9,MKK9	.	-	65.98	25.5
chr3	5081780	5084240	AT3G15095_HCF243	.	+	72.37	27.98
chr2	9728756	9731301	AT2G22840_AtGRF1,GRF1	.	+	66.88	25.86
chr2	17653138	17654034	AT2G42395_	.	-	64.81	25.06
chr5	3784251	3784792	AT5G11740_AGP15,ATAGP15	.	+	44.38	17.16
chr5	26714764	26717788	AT5G66900_	.	-	60.66	23.46
chr4	9928678	9929518	AT4G17870_PYR1,RCAR11	.	+	56.98	22.04
chr5	2399504	2400601	AT5G07580_	.	+	54.78	21.19
chr3	9397786	9399762	AT3G25740_MAP1B,MAP1C	.	+	42.32	16.37
chr4	14512549	14514492	AT4G29590_	.	-	62.43	24.16
chr5	24707500	24708893	AT5G61440_ACHT5	.	+	52.93	20.49
chr2	19058130	19061436	AT2G46430_ATCNGC3,CNGC3,CNGC3.C	.	+	36.03	13.95
chr1	27346261	27348256	AT1G72640_	.	-	66.38	25.71
chr2	14354098	14354169	AT2G33940_	.	+	43.61	16.89
chr1	12685200	12687641	AT1G34630_	.	+	53.75	20.82
chr1	23391063	23392851	AT1G63090_AtPP2-A11,PP2-A11	.	-	81.59	31.61
chr3	17888101	17889814	AT3G48310_CYP71A22	.	+	53.03	20.55
chr4	18305585	18305704	AT4G39366_	.	+	62.16	24.09
chr1	20122426	20122866	AT1G53887_	.	-	5.38	2.08
chr3	10355513	10356437	AT3G27906_	.	-	67.5	26.17
chr2	16050063	16051168	AT2G38310_PYL4,RCAR10	.	+	67.91	26.33
chr3	20557899	20560212	AT3G55450_PBL1	.	+	57.67	22.36
chr1	1645498	1647147	AT1G05560_UGT1,UGT75B1	.	-	63	24.43
chr1	29430225	29432764	AT1G78230_	.	+	53.73	20.84
chr5	19522255	19524698	AT5G48150_PAT1	.	-	58.02	22.52
chr5	16854191	16855645	AT5G42190_ASK2,SKP1B	.	-	74.11	28.77
chr3	404733	405656	AT3G02180_SP1L3	.	+	62.61	24.31
chr2	12874706	12876122	AT2G30150_	.	+	61.05	23.72
chr3	17558849	17560767	AT3G47620_AtTCP14,TCP14	.	+	59.6	23.16
chr4	16896202	16898876	AT4G35600_CST,CX32,Kin4	.	+	53.75	20.89
chr5	26884664	26887204	AT5G67385_	.	+	63.82	24.81
chr4	8218378	8219322	AT4G14270_	.	+	57.44	22.33
chr2	9579874	9583893	AT2G22540_AGL22,FAQ1,SVP	.	+	48.67	18.92
chr3	18945025	18946621	AT3G51000_	.	-	61.5	23.91
chr3	19407023	19409457	AT3G52340_ATSPP2,SPP2	.	+	72.4	28.15
chr3	4940318	4941398	AT3G14700_	.	+	42.49	16.52
chr1	19913076	19916517	AT1G53380_	.	-	48.4	18.82
chr1	26039048	26040720	AT1G69260_AFP1	.	+	45.37	17.65
chr1	28190816	28193800	AT1G75100_JAC1	.	-	50.32	19.58
chr1	15973054	15976703	AT1G42540_ATGLR3.3,GLR3.3	.	+	52.39	20.39
chr3	22733309	22735335	AT3G61430_ATPIP1,PIP1,PIP1;1,PIP1A	.	+	68.52	26.67
chr4	2572621	2576595	AT4G05020_NDB2	.	+	52.46	20.42
chr4	8341335	8343234	AT4G14520_	.	+	46.86	18.24
chr1	28078857	28079987	AT1G74730_	.	+	71.04	27.66
chr3	5061681	5064115	AT3G15030_MEE35,TCP4	.	+	76.86	29.93
chr1	11214824	11216037	AT1G31330_PSAF	.	-	122.22	47.62
chr1	15651027	15652542	AT1G41880_	.	-	75.33	29.35
chr1	9492964	9494069	AT1G27330_	.	+	58.28	22.71
chr2	10955519	10956052	AT2G25720_	.	-	81.81	31.89
chr4	7349267	7353135	AT4G12420_SKU5	.	-	41.16	16.05
chr1	2225900	2227566	AT1G07250_UGT71C4	.	+	84.75	33.06
chr5	23098959	23099368	AT5G57080_	.	+	38.82	15.16
chr2	7516415	7519633	AT2G17290_ATCDPK3,ATCPK6,CPK6	.	+	45.6	17.81
chr1	18627559	18628434	AT1G50290_	.	-	27.5	10.74
chr4	14950638	14952376	AT4G30630_	.	+	54.46	21.28
chr1	8350793	8352791	AT1G23550_SRO2	.	+	39.32	15.37
chr1	26920440	26921152	AT1G71430_	.	+	69.05	27.01
chr3	3923735	3925465	AT3G12320_LNK3	.	+	106.4	41.63
chr1	10288197	10289621	AT1G29395_COR413-TM1,COR413IM1,COR414-TM1	.	-	56.3	22.03
chr2	17072464	17074164	AT2G40920_	.	-	66.07	25.86
chr5	20373515	20376207	AT5G50110_	.	+	40.88	16
chr1	847873	849500	AT1G03430_AHP5	.	+	68.78	26.93
chr3	20806749	20808152	AT3G56070_ROC2	.	-	63.78	24.98
chr5	21111445	21113403	AT5G51970_	.	+	58.85	23.05
chr3	18888868	18890101	AT3G50810_	.	-	61.07	23.92
chr3	7079617	7081921	AT3G20300_	.	-	59.58	23.34
chr5	16065091	16067574	AT5G40170_AtRLP54,RLP54	.	-	49.6	19.43
chr1	26186954	26189489	AT1G69610_	.	+	49.67	19.46
chr3	21238433	21240228	AT3G57400_	.	+	95.65	37.48
chr3	20695499	20698271	AT3G55740_ATPROT2,PROT2	.	+	51.7	20.26
chr4	7214703	7215989	AT4G12040_AtSAP7,SAP7	.	+	82.28	32.25
chr3	8621986	8623162	AT3G23880_	.	-	57.28	22.45
chr1	2047825	2049418	AT1G06680_OE23,OEE2,PSBP-1,PSII-P	.	+	100.02	39.21
chr1	20454389	20456220	AT1G54850_	.	+	54.06	21.19
chr5	17462547	17467448	AT5G43470_HRT,RCY1,RPP8	.	-	40.89	16.03
chr5	6286847	6287590	AT5G18850_	.	+	46.6	18.27
chr3	3738897	3741714	AT3G11850_	.	-	47.26	18.53
chr4	11968276	11971149	AT4G22780_ACR7	.	-	38.99	15.29
chr3	19639668	19640619	AT3G52960_	.	+	116.8	45.83
chr2	15059337	15061100	AT2G35859_	.	-	77.45	30.39
chr3	10129105	10129937	AT3G27360_H3.1	.	-	69.69	27.35
chr4	13847549	13849887	AT4G27780_ACBP2,AtACBP2	.	+	63.27	24.83
chr5	5652218	5652983	AT5G17190_	.	+	125.02	49.07
chr1	11785806	11788286	AT1G32583_	.	+	52.48	20.6
chr4	8011424	8012780	AT4G13830_DJC26,J20	.	+	40.05	15.72
chr4	7531141	7533587	AT4G12830_	.	+	36.56	14.35
chr1	22093569	22094626	AT1G60000_	.	-	115.89	45.51
chr4	17562345	17564596	AT4G37330_CYP81D4	.	-	47.12	18.51
chr2	14891102	14892218	AT2G35370_GDCH	.	+	67.88	26.67
chr4	2328449	2330200	AT4G04620_ATG8B	.	-	55.61	21.85
chr3	22460189	22461779	AT3G60770_	.	-	89.07	35.01
chr4	12362484	12365098	AT4G23730_	.	+	54.04	21.24
chr1	9336057	9337786	AT1G26930_	.	-	46.4	18.24
chr2	10426342	10427594	AT2G24540_AFR	.	+	62.39	24.53
chr5	13233374	13235567	AT5G34930_	.	+	72.02	28.32
chr4	18074475	18075765	AT4G38690_	.	-	61.59	24.22
chr4	117152	118577	AT4G00270_	.	-	80.01	31.48
chr5	21945869	21948913	AT5G54080_AtHGO,HGO	.	+	61.23	24.09
chr1	19706085	19706706	AT1G52905_	.	+	23.69	9.32
chr3	299987	302038	AT3G01850_	.	-	73.49	28.93
chr5	16227834	16228693	AT5G40500_	.	+	82.34	32.42
chr1	24097913	24100952	AT1G64860_RPOD1,SIG1,SIG2,SIGA,SIGB	.	+	63.26	24.91
chr1	3787334	3790876	AT1G11280_	.	-	41.16	16.21
chr1	5398990	5402733	AT1G15690_AtAVP1,ATAVP3,AtVHP1;1,AVP-3,AVP1,FUGU5,VHP1	.	+	76.7	30.23
chr4	12754529	12757786	AT4G24740_AFC2,AME1,FC2	.	-	73.42	28.94
chr5	17589394	17591535	AT5G43780_APS4	.	-	53.53	21.1
chr1	2852454	2855779	AT1G08900_	.	+	41.02	16.17
chr2	15228788	15230496	AT2G36320_	.	+	34.27	13.51
chr5	24112200	24113617	AT5G59850_	.	-	89.54	35.31
chr1	17424669	17427475	AT1G47490_ATRBP47C,RBP47C	.	+	82.33	32.47
chr2	8964349	8965430	AT2G20820_	.	+	95.11	37.52
chr3	6024795	6026443	AT3G17611_ATRBL10,ATRBL14,RBL10,RBL14	.	+	42.58	16.8
chr1	7158244	7160526	AT1G20650_ASG5	.	-	60.64	23.93
chr5	20048239	20049597	AT5G49440_	.	+	76.7	30.27
chr3	1288612	1290602	AT3G04730_IAA16	.	-	42.52	16.78
chr1	2712883	2714734	AT1G08570_ACHT4	.	+	77.23	30.49
chr5	22985193	22988013	AT5G56850_	.	-	51.27	20.24
chr1	5193426	5194203	AT1G15100_RHA2A	.	-	78	30.81
chr4	17044945	17047315	AT4G36030_ARO3	.	-	79.96	31.59
chr3	3232608	3233685	AT3G10400_U11/U12-31K	.	+	69.88	27.61
chr1	12417176	12421523	AT1G34110_	.	-	46.14	18.23
chr1	28281389	28284045	AT1G75380_ATBBD1,BBD1	.	-	85.1	33.63
chr5	26753510	26757236	AT5G67030_ABA1,ATABA1,ATZEP,IBS3,LOS6,NPQ2,ZEP	.	-	67.81	26.8
chr5	18530880	18532337	AT5G45680_ATFKBP13,FKBP13	.	+	50.85	20.1
chr3	23214371	23217045	AT3G62750_BGLU8	.	+	42.62	16.85
chr5	20832025	20833782	AT5G51260_	.	-	42.03	16.62
chr2	12624586	12625637	AT2G29450_AT103-1A,ATGSTU1,ATGSTU5,GSTU5	.	-	49.46	19.56
chr4	13217649	13219933	AT4G26070_ATMEK1,MEK1,MKK1,NMAPKK	.	+	51.63	20.42
chr3	22777829	22780191	AT3G61560_	.	+	42.63	16.86
chr3	9536923	9540453	AT3G26100_	.	+	56.55	22.37
chr1	2105048	2106749	AT1G06850_AtbZIP52,bZIP52	.	+	57.81	22.87
chr4	10076079	10077748	AT4G18210_ATPUP10,PUP10	.	+	41.35	16.36
chr4	7856767	7857933	AT4G13500_	.	-	39.93	15.8
chr4	15487944	15489450	AT4G32020_	.	+	62.69	24.81
chr5	1503232	1504494	AT5G05090_	.	+	78.63	31.12
chr4	10830237	10832094	AT4G19985_	.	-	56.56	22.39
chr1	19651325	19652743	AT1G52760_LysoPL2	.	+	81.5	32.27
chr3	7638663	7642205	AT3G21690_	.	+	50.11	19.84
chr2	12378337	12380742	AT2G28840_XBAT31	.	+	80.16	31.76
chr1	1744773	1747693	AT1G05805_AKS2	.	+	42.11	16.69
chr5	18662846	18664874	AT5G46020_	.	-	66.57	26.39
chr2	18953280	18954619	AT2G46100_	.	+	58.82	23.32
chr1	11114701	11116195	AT1G31130_	.	-	96.19	38.14
chr1	894254	897518	AT1G03590_	.	-	43.74	17.34
chr4	17554641	17555861	AT4G37300_MEE59	.	+	47.24	18.73
chr4	9500506	9505455	AT4G16890_BAL,SNC1	.	-	52.03	20.63
chr2	10940096	10942255	AT2G25690_	.	-	54.14	21.47
chr3	17891134	17892847	AT3G48320_CYP71A21	.	+	55.32	21.94
chr3	3366331	3366430	AT3G10745_MIR158A	.	-	72.41	28.72
chr3	21233701	21235911	AT3G57390_AGL18	.	+	49.9	19.79
chr5	16722097	16722288	AT5G41774_	.	-	6.09	2.41
chr2	8511507	8513221	AT2G19730_	.	+	94.99	37.69
chr2	14908844	14909863	AT2G35470_	.	-	89.04	35.34
chr1	27598106	27599812	AT1G73400_	.	+	64.25	25.5
chr2	11752170	11754028	AT2G27500_	.	-	39.26	15.58
chr1	4467220	4469033	AT1G13110_CYP71B7	.	+	48.68	19.32
chr3	16949531	16950145	AT3G46150_	.	-	71.51	28.39
chr3	3271490	3274030	AT3G10500_ANAC053,NAC053,NTL4	.	+	56.68	22.51
chr4	10784391	10786556	AT4G19880_	.	-	49.55	19.68
chr1	2187776	2188733	AT1G07130_ATSTN1,STN1	.	+	43.48	17.27
chr1	19052023	19052582	AT1G51400_	.	-	85.61	34.01
chr3	22951463	22952851	AT3G61970_NGA2	.	+	82.38	32.73
chr1	4076334	4076981	AT1G12060_ATBAG5,BAG5	.	+	64.88	25.78
chr3	18899930	18901209	AT3G50845_	.	-	48.8	19.39
chr5	14762370	14764344	AT5G37290_	.	+	50.18	19.95
chr2	8968209	8970727	AT2G20830_	.	-	69.84	27.77
chr1	8557216	8558832	AT1G24170_GATL8,LGT9	.	-	77.68	30.89
chr3	8724159	8725912	AT3G24150_	.	-	74.43	29.6
chr1	24158650	24159585	AT1G65032_	.	-	49.41	19.65
chr3	4821523	4824178	AT3G14420_GOX1	.	+	77.73	30.92
chr5	15606771	15607350	AT5G38980_	.	+	57.04	22.69
chr5	7736590	7738535	AT5G23060_CaS	.	-	74.4	29.6
chr5	588893	588966	AT5G02615_	.	-	14.74	5.86
chr1	20906134	20907413	AT1G55910_ZIP11	.	+	85.9	34.18
chr1	20912116	20913447	AT1G55920_ATSERAT2;1,SAT1,SAT5,SERAT2;1	.	+	65.04	25.88
chr1	8710180	8710824	AT1G24580_	.	+	43.47	17.3
chr4	16805869	16806655	AT4G35320_	.	-	50.2	19.98
chr2	17690531	17691018	AT2G42485_	.	+	49.49	19.7
chr2	13141357	13142613	AT2G30870_ATGSTF10,ATGSTF4,ERD13,GSTF10	.	+	68.78	27.39
chr5	15616917	15619358	AT5G39020_	.	+	60.65	24.16
chr3	7666808	7668565	AT3G21755_	.	-	50.81	20.24
chr4	873054	874772	AT4G01995_	.	+	38.41	15.3
chr2	6480917	6482420	AT2G15000_	.	-	76.27	30.39
chr1	11798810	11800988	AT1G32640_ATMYC2,JAI1,JIN1,MYC2,RD22BP1,ZBF1	.	-	60.15	23.97
chr1	8180577	8183570	AT1G23080_ATPIN7,PIN7	.	-	57.51	22.93
chr5	7103470	7104023	AT5G20935_CRR42	.	+	66.16	26.38
chr4	10777512	10780461	AT4G19860_	.	-	67.47	26.91
chr4	1440146	1441863	AT4G03280_PETC,PGR1	.	+	94.34	37.63
chr5	15903296	15905464	AT5G39740_OLI7,RPL5B	.	+	81.58	32.54
chr3	7595806	7597577	AT3G21560_BRT1,UGT84A2	.	+	59.52	23.74
chr1	4773576	4774867	AT1G13950_ATELF5A-1,EIF-5A,EIF5A,ELF5A-1	.	+	52.57	20.97
chr2	12666935	12670311	AT2G29630_PY,THIC	.	+	65.75	26.23
chr2	12592148	12593686	AT2G29320_	.	+	44.12	17.6
chr1	23795050	23795642	AT1G64105_ANAC027,NAC027	.	+	90.98	36.3
chr3	23334352	23336109	AT3G63170_AtFAP1,FAP1	.	+	41.03	16.37
chr3	15567099	15569901	AT3G43670_	.	+	38.29	15.28
chr4	18530543	18532259	AT4G39955_	.	+	53.06	21.18
chr5	6387489	6390024	AT5G19090_	.	+	46.7	18.65
chr4	9965742	9966969	AT4G17940_	.	+	74.66	29.82
chr5	3516217	3516995	AT5G11070_	.	-	59.53	23.78
chr2	12024149	12025306	AT2G28200_	.	+	52.56	21
chr3	17716867	17720020	AT3G48000_ALDH2,ALDH2A,ALDH2B4	.	-	68.74	27.47
chr5	4207004	4208289	AT5G13200_	.	+	62.61	25.02
chr3	4392956	4393961	AT3G13480_	.	-	104.19	41.65
chr1	11221335	11222786	AT1G31350_KUF1	.	-	52.28	20.9
chr5	5524282	5526589	AT5G16800_	.	-	54.35	21.73
chr1	20617313	20618005	AT1G55265_	.	+	67.02	26.8
chr1	28129858	28131077	AT1G74880_NDH-O,NdhO	.	-	73.79	29.51
chr3	18417565	18418278	AT3G49668_	.	-	81.11	32.44
chr1	9455368	9458026	AT1G27210_	.	-	53.18	21.27
chr4	2660338	2662908	AT4G05150_	.	+	32.64	13.06
chr1	3849360	3850662	AT1G11440_	.	+	61.54	24.63
chr5	14844359	14845560	AT5G37440_	.	-	40.83	16.34
chr4	8299042	8299134	AT4G14403_	.	-	16.8	6.72
chr3	8603444	8605462	AT3G23820_GAE6	.	+	57.45	23
chr2	6314032	6315766	AT2G14750_AKN1,APK,APK1,ATAKN1	.	+	56.46	22.61
chr1	19737432	19740348	AT1G52980_AtNug2,Nug2	.	+	69.09	27.67
chr5	1742692	1742764	AT5G05795_	.	+	9.65	3.86
chr4	18435293	18437136	AT4G39740_HCC2	.	-	54.45	21.81
chr1	30403644	30404690	AT1G80920_AtJ8,AtToc12,DJC22,J8,Toc12	.	-	41.71	16.71
chr4	16288112	16288913	AT4G33985_	.	-	53.45	21.42
chr5	22768577	22772896	AT5G56250_HAP8	.	-	48.16	19.3
chr1	21355520	21356537	AT1G57660_	.	+	73.35	29.4
chr5	15185077	15186508	AT5G38040_	.	+	40.87	16.38
chr1	1008810	1008896	AT1G03935_	.	+	54.52	21.86
chr1	910023	911193	AT1G03650_	.	-	43.52	17.45
chr5	25921409	25923358	AT5G64850_	.	+	45.67	18.32
chr1	28199970	28201950	AT1G75130_CYP721A1	.	-	46.7	18.74
chr5	22276513	22278423	AT5G54840_ATSGP1,SGP1	.	-	36.3	14.57
chr1	23689697	23690807	AT1G63840_	.	-	34.48	13.84
chr1	9425460	9426886	AT1G27130_ATGSTU13,GST12,GSTU13	.	+	50.31	20.2
chr1	28255495	28257040	AT1G75300_	.	+	69.78	28.02
chr3	21683568	21685941	AT3G58630_	.	-	80.84	32.47
chr3	10940446	10941833	AT3G28920_AtHB34,HB34,ZHD9	.	-	63.1	25.35
chr2	10736483	10737654	AT2G25200_	.	-	51.99	20.89
chrMt	329082	329465	ATMG01330_ORF107H	.	-	2.8	1.12
chr5	17142820	17144160	AT5G42750_BKI1	.	-	61.48	24.72
chr3	10125659	10127992	AT3G27350_	.	+	61.4	24.69
chr1	22445310	22447214	AT1G60960_ATIRT3,IRT3	.	-	49.01	19.71
chr1	9933884	9935271	AT1G28330_AtDRM1,DRM1,DYL1	.	-	48.28	19.42
chr2	15290204	15291763	AT2G36430_	.	+	59.36	23.88
chr3	5180642	5181586	AT3G15353_ATMT3,MT3	.	-	53.42	21.49
chr1	1820977	1821918	AT1G06002_	.	+	82.17	33.06
chr3	727554	729504	AT3G03150_	.	-	33.01	13.28
chr2	6920369	6922025	AT2G15890_MEE14	.	-	64.18	25.83
chr3	23091586	23092850	AT3G62422_CPuORF3	.	-	93.15	37.5
chr5	24775035	24776390	AT5G61640_ATMSRA1,PMSR1	.	+	69.33	27.91
chr5	25383906	25387252	AT5G63370_CDKG1	.	-	74.99	30.2
chr1	18926876	18927646	AT1G51060_HTA10	.	+	80.76	32.53
chr3	16342295	16343014	AT3G44798_	.	+	48.09	19.37
chr2	8813862	8815253	AT2G20450_	.	+	82.32	33.17
chr3	20341588	20342393	AT3G54900_ATGRXCP,CXIP1	.	-	132.69	53.47
chr4	8054861	8057181	AT4G13940_ATSAHH1,EMB1395,HOG1,MEE58,SAH1,SAHH1	.	+	102.44	41.28
chr1	4174875	4177559	AT1G12280_SUMM2	.	-	57.08	23.01
chr2	9829450	9830410	AT2G23090_	.	-	86.48	34.88
chr2	13640668	13641953	AT2G32070_	.	-	104.21	42.06
chr5	6774302	6775845	AT5G20050_	.	+	58.23	23.5
chr5	18974231	18976009	AT5G46760_MYC3	.	+	123.22	49.75
chr1	2408203	2409580	AT1G07770_RPS15A	.	-	49.69	20.06
chr1	10909150	10909784	AT1G30757_	.	+	53.93	21.78
chr2	19061861	19064881	AT2G46440_ATCNGC11,CNGC11	.	+	26.2	10.58
chr4	17276936	17279201	AT4G36640_	.	-	38.99	15.75
chr4	11765803	11767304	AT4G22240_	.	-	85.83	34.68
chr3	9451861	9457554	AT3G25840_	.	-	70.99	28.69
chr5	1917641	1918896	AT5G06280_	.	-	104.84	42.38
chr1	7704255	7706140	AT1G21920_	.	-	90.34	36.52
chr3	6548869	6551853	AT3G18990_REM39,VRN1	.	-	47.69	19.28
chr5	289765	291326	AT5G01750_	.	+	44.84	18.13
chr2	17266477	17268024	AT2G41420_WIH2	.	-	86.5	34.98
chr5	5607788	5609492	AT5G17050_UGT78D2	.	-	71.76	29.02
chr2	14113025	14116087	AT2G33310_IAA13	.	-	47.08	19.04
chr4	12043966	12045701	AT4G22980_	.	-	59.19	23.94
chr5	9484734	9486149	AT5G26960_	.	-	83.66	33.84
chr3	9813371	9814750	AT3G26710_CCB1	.	+	67.12	27.15
chr3	10324839	10325713	AT3G27850_RPL12-C	.	+	86.23	34.89
chr2	6399621	6401059	AT2G14890_AGP9	.	+	52.45	21.22
chr4	2588004	2589386	AT4G05050_UBQ11	.	-	82.66	33.45
chr3	23091586	23092850	AT3G62420_ATBZIP53,BZIP53	.	-	92.07	37.27
chr1	2752154	2753703	AT1G08650_ATPPCK1,PPCK1	.	+	54.4	22.02
chr5	24557201	24559879	AT5G61020_ECT3	.	-	66.05	26.74
chr5	25762270	25764154	AT5G64430_	.	-	93.54	37.88
chr1	28892062	28893676	AT1G76920_	.	+	104.93	42.5
chr3	19940814	19943799	AT3G53830_	.	+	46.86	18.98
chr4	11356143	11357267	AT4G21350_B80,PUB8	.	-	106.28	43.06
chr4	17045092	17047297	AT4G36032_	.	+	83.54	33.85
chr3	9639199	9640866	AT3G26300_CYP71B34	.	-	60.2	24.4
chr1	22607466	22610273	AT1G61300_	.	-	40.71	16.5
chr3	2468185	2469606	AT3G07730_	.	+	45.1	18.28
chr5	22531358	22533122	AT5G55630_ATKCO1,ATTPK1,KCO1,KCO1,TPK1	.	+	68.55	27.79
chr5	5003307	5006882	AT5G15410_ATCNGC2,CNGC2,DND1	.	-	74.86	30.35
chr5	18629562	18630706	AT5G45940_AtNUDT11,AtNUDX11,NUDT11,NUDX11	.	-	35.08	14.22
chr3	2717675	2718883	AT3G08940_LHCB4.2	.	+	71.35	28.93
chr5	22935211	22936060	AT5G56670_	.	-	96.81	39.26
chr2	11974663	11976600	AT2G28100_ATFUC1,FUC1	.	+	61.87	25.09
chr4	12420414	12421464	AT4G23890_CRR31,NdhS	.	-	113.73	46.15
chr1	6671137	6672653	AT1G19300_ATGATL1,GATL1,GLZ1,PARVUS	.	-	44.49	18.05
chr5	6217912	6220702	AT5G18650_MIEL1	.	+	69	28.01
chr3	18158747	18161379	AT3G48990_AAE3	.	-	79.86	32.42
chr2	16570746	16573548	AT2G39730_RCA	.	-	72.6	29.48
chr2	13277811	13278745	AT2G31160_LSH3,OBO1	.	+	60.13	24.42
chr1	28458782	28460854	AT1G75800_	.	+	45.31	18.4
chr3	23163747	23165195	AT3G62630_	.	-	68.15	27.68
chr1	24473121	24476715	AT1G65800_ARK2,RK2	.	+	32.74	13.3
chr3	19025110	19026779	AT3G51238_	.	-	63.14	25.66
chr1	20967930	20971742	AT1G56070_LOS1	.	-	62.54	25.42
chr5	145636	147200	AT5G01350_	.	-	74	30.08
chr3	9532748	9535629	AT3G26090_ATRGS1,RGS1	.	+	42.22	17.16
chr3	10447922	10451034	AT3G28070_UMAMIT46	.	+	36.6	14.88
chr1	8976434	8978093	AT1G25550_	.	+	40.18	16.34
chr1	20577424	20578292	AT1G55152_	.	-	41.92	17.05
chr5	4485168	4485311	AT5G13917_	.	-	14.49	5.89
chr5	1905287	1908167	AT5G06265_	.	+	51.35	20.89
chr4	9176673	9178048	AT4G16210_E-COAH-2,ECHIA	.	-	79.53	32.36
chr1	3524018	3526346	AT1G10650_	.	-	65.01	26.46
chr3	8478122	8479857	AT3G23610_DSPTP1	.	+	59.97	24.41
chr4	13857749	13860571	AT4G27820_BGLU9	.	-	50.41	20.52
chr1	3322802	3323548	AT1G10140_	.	-	49.78	20.27
chr3	9946166	9948040	AT3G26980_MUB4	.	-	43.96	17.9
chr2	19237434	19239405	AT2G46800_ATCDF1,ATMTP1,MTP1,OZS1,ZAT,ZAT1	.	+	67.52	27.5
chr1	6254229	6255690	AT1G18170_	.	+	44.89	18.29
chr1	1820308	1821894	AT1G06000_	.	-	68.81	28.04
chr3	1047640	1049260	AT3G04040_	.	+	42.31	17.24
chr5	17347567	17348641	AT5G43210_	.	+	64.36	26.23
chr2	12414114	12415578	AT2G28900_ATOEP16-1,ATOEP16-L,OEP16,OEP16-1	.	-	57.8	23.56
chr1	12004927	12008833	AT1G33110_	.	+	38.15	15.55
chr3	4922131	4924694	AT3G14650_CYP72A11	.	+	78.81	32.13
chr1	22646072	22649521	AT1G61380_SD1-29	.	-	51.36	20.94
chr1	6809724	6812663	AT1G19700_BEL10,BLH10	.	-	68.44	27.91
chr5	7651957	7652622	AT5G22880_H2B,HTB2	.	-	43.97	17.93
chr5	3258474	3260234	AT5G10360_EMB3010,RPS6B	.	-	76.79	31.32
chr1	29535285	29537417	AT1G78510_AtSPS1,SPS1	.	-	66.02	26.93
chr5	10292651	10295283	AT5G28300_AtGT2L,GT2L	.	-	47.98	19.57
chr2	14194150	14195647	AT2G33510_	.	+	41.9	17.09
chr2	18682108	18683827	AT2G45315_	.	-	73	29.78
chr5	21981996	21984363	AT5G54160_ATOMT1,COMT1,OMT1	.	+	51.8	21.13
chr4	13395493	13397838	AT4G26542_	.	+	58.21	23.75
chr1	19756824	19759623	AT1G53025_	.	-	41.64	16.99
chr1	24086558	24088538	AT1G64810_APO1	.	+	61.38	25.05
chr5	12558256	12562020	AT5G33290_XGD1	.	+	37.91	15.47
chr1	18410929	18412801	AT1G49750_	.	-	47.85	19.53
chr3	9978095	9979699	AT3G27050_	.	-	46.5	18.98
chr1	7994291	7997588	AT1G22610_	.	+	86.31	35.24
chr1	2873465	2877270	AT1G08930_ERD6	.	+	35.57	14.52
chr5	1984991	1987044	AT5G06510_NF-YA10	.	+	62.43	25.49
chr3	6934773	6937120	AT3G19930_ATSTP4,STP4	.	+	45.43	18.55
chr5	21723307	21724642	AT5G53490_	.	-	87.69	35.82
chr1	3549992	3550632	AT1G10690_	.	-	50.02	20.43
chr5	26959569	26960323	AT5G67600_WIH1	.	-	44.7	18.26
chr1	27633260	27634964	AT1G73490_	.	-	71.52	29.22
chr3	476802	476873	AT3G02335_	.	+	17.26	7.05
chr2	13814686	13818289	AT2G32540_ATCSLB04,ATCSLB4,CSLB04,CSLB04	.	+	40.54	16.57
chr5	24739026	24741273	AT5G61520_	.	-	54	22.08
chr5	20317405	20319830	AT5G49945_	.	+	58.56	23.95
chr2	14734270	14734536	AT2G34925_CLE42	.	+	31.18	12.75
chr2	14849536	14851969	AT2G35260_	.	+	78.85	32.26
chr4	13861718	13864500	AT4G27830_AtBGLU10,BGLU10	.	-	44.11	18.05
chr4	1117154	1119817	AT4G02540_	.	+	62.26	25.48
chr5	22759803	22764587	AT5G56240_	.	-	56.42	23.09
chr4	8521522	8523705	AT4G14900_	.	-	93.38	38.22
chr1	20962624	20963464	AT1G56045_	.	+	59.96	24.54
chr5	2940525	2941094	AT5G09443_	.	-	41.61	17.03
chr4	13527	14413	AT4G00030_	.	+	137.72	56.38
chr2	16556856	16557577	AT2G39705_DVL11,RTFL8	.	+	48.66	19.92
chr2	12681958	12685087	AT2G29670_	.	-	51.76	21.19
chr5	4153585	4154672	AT5G13090_	.	-	46.87	19.19
chr2	10444790	10446242	AT2G24580_	.	-	59.15	24.22
chr3	22242504	22244061	AT3G60180_	.	-	33.36	13.66
chr1	18150538	18153361	AT1G49050_	.	+	43.49	17.81
chr5	5368034	5369641	AT5G16420_	.	+	74.8	30.64
chr1	28544338	28545376	AT1G76065_	.	-	64.81	26.56
chr2	9451605	9454094	AT2G22240_ATIPS2,ATMIPS2,MIPS2	.	-	63.91	26.2
chr2	19286658	19287581	AT2G46940_	.	-	39.64	16.25
chr1	22073534	22074876	AT1G59970_	.	+	54.12	22.19
chr2	15981700	15982917	AT2G38150_	.	-	53.29	21.85
chr1	11288452	11293753	AT1G31540_	.	-	45.9	18.82
chr4	14026577	14028622	AT4G28350_LecRK-VII.2	.	+	62.02	25.44
chr2	19260918	19262404	AT2G46870_NGA1	.	+	54.17	22.22
chr5	23745883	23747274	AT5G58800_	.	-	69.09	28.35
chr5	771725	773515	AT5G03240_UBQ3	.	-	71.41	29.32
chr5	32832	34326	AT5G01090_	.	+	80.71	33.14
chr5	3524680	3525846	AT5G11090_	.	+	107.25	44.04
chr1	24060770	24062630	AT1G64780_AMT1;2,ATAMT1;2	.	-	61.21	25.14
chr3	4707113	4708848	AT3G14180_ASIL2	.	-	72.64	29.85
chr5	21560718	21562260	AT5G53160_PYL8,RCAR3	.	+	97.04	39.88
chr2	13044931	13046663	AT2G30620_	.	+	55.94	22.99
chr1	23204773	23206665	AT1G62670_RPF2	.	-	47.01	19.32
chr5	5649193	5651158	AT5G17170_ENH1	.	+	78.92	32.44
chr1	552640	552711	AT1G02600_	.	+	7.7	3.16
chr1	17611963	17612548	AT1G47820_	.	+	64.07	26.35
chr3	20571434	20571938	AT3G55485_	.	+	40.34	16.59
chr5	10301936	10306142	AT5G28320_	.	+	6.48	2.66
chr3	1468398	1470551	AT3G05180_	.	-	39.85	16.39
chr3	4060971	4063306	AT3G12780_PGK1	.	-	84.3	34.68
chr1	28865500	28868225	AT1G76880_	.	+	58.33	24
chr3	3713760	3714579	AT3G11745_	.	-	50.65	20.84
chr2	17765480	17766888	AT2G42650_	.	+	78.64	32.36
chr2	12424303	12426674	AT2G28930_APK1B,PK1B	.	+	57.87	23.82
chr5	15190229	15191689	AT5G38070_	.	+	46.59	19.18
chr1	19498419	19498492	AT1G52350_	.	-	16.62	6.84
chr4	15589674	15591164	AT4G32290_	.	-	53.83	22.17
chr3	6488862	6491273	AT3G18830_ATPLT5,ATPMT5,PMT5	.	-	56.23	23.16
chr3	3424813	3426997	AT3G10960_ATAZG1,AZG1	.	-	58.05	23.91
chr3	2953737	2955748	AT3G09630_	.	+	129.3	53.27
chr1	28215836	28218801	AT1G75180_	.	-	62.41	25.71
chr5	3052097	3054614	AT5G09810_ACT7,AtACT7	.	+	80.24	33.07
chr3	22857897	22859254	AT3G61750_	.	-	69.59	28.68
chr2	13671841	13673376	AT2G32179_	.	+	22.45	9.25
chr3	2354719	2356854	AT3G07360_ATPUB9,PUB9	.	+	76.16	31.4
chr5	5584801	5587063	AT5G17000_	.	-	44.85	18.49
chr3	2657918	2660889	AT3G08760_ATSIK	.	-	50.96	21.01
chr4	5383852	5387058	AT4G08470_MAPKKK10,MEKK3	.	-	51.32	21.16
chr5	15277239	15279317	AT5G38240_	.	-	35.46	14.62
chr2	11758079	11759476	AT2G27510_ATFD3,FD3	.	-	56.77	23.41
chr5	24090715	24093168	AT5G59790_	.	+	35.47	14.63
chr1	6740500	6740591	AT1G19464_MIR864A	.	+	14.87	6.13
chr5	15901679	15902870	AT5G39730_	.	+	49.28	20.33
chr3	7946526	7949096	AT3G22420_ATWNK2,WNK2,ZIK3	.	+	49.74	20.52
chr2	19332904	19335031	AT2G47060_PTI1-4	.	-	64.23	26.5
chr3	20339504	20341103	AT3G54890_LHCA1	.	-	84.26	34.78
chr5	730292	731448	AT5G03110_	.	+	61.46	25.37
chr5	15451933	15453897	AT5G38590_	.	-	52.3	21.59
chr1	29636955	29638552	AT1G78830_	.	-	68.44	28.26
chr3	22373215	22374387	AT3G60530_GATA4	.	+	61.46	25.38
chr3	2393686	2394675	AT3G07510_	.	-	77.47	32
chr3	22922550	22922940	AT3G61898_	.	+	34.33	14.18
chr1	24992553	24996117	AT1G66970_GDPDL1,SVL2	.	-	43.79	18.09
chr3	3663544	3663986	AT3G11591_	.	-	25.35	10.47
chr4	15494065	15496356	AT4G32040_KNAT5	.	+	85.77	35.44
chr3	19086452	19088110	AT3G51430_SSL5,YLS2	.	+	69.29	28.63
chr4	18077790	18080083	AT4G38710_	.	-	103.59	42.81
chr4	16091940	16094958	AT4G33440_	.	+	37.78	15.61
chr3	6558973	6562119	AT3G19020_	.	-	57.57	23.79
chr2	16366157	16368275	AT2G39210_	.	-	42.85	17.71
chr2	12617936	12618899	AT2G29420_ATGSTU7,GST25,GSTU7	.	-	52.81	21.83
chr3	10318505	10319432	AT3G27830_RPL12,RPL12-A	.	+	94.71	39.17
chr1	8544250	8545551	AT1G24148_	.	+	40.14	16.6
chr2	9076292	9077468	AT2G21187_	.	+	37.77	15.62
chr5	14751344	14753088	AT5G37260_CIR1,RVE2	.	-	46.71	19.32
chr3	17228673	17231201	AT3G46780_PTAC16	.	+	48.28	19.97
chr1	5686603	5687715	AT1G16640_	.	+	39.6	16.38
chr2	10063155	10063863	AT2G23670_YCF37	.	-	56.29	23.29
chr1	28449990	28451108	AT1G75770_	.	+	48.43	20.04
chr3	8941066	8942874	AT3G24520_AT-HSFC1,HSFC1	.	+	38.11	15.77
chr1	2338904	2339321	AT1G07600_ATMT-2,ATMT-Q,ATMT1,LSR4,MT-Q,MT1,MT1A	.	-	49.8	20.61
chr3	16596381	16598698	AT3G45260_	.	-	50.16	20.76
chr1	8268404	8271933	AT1G23310_AOAT1,GGAT1,GGT1	.	-	69.62	28.82
chr5	6711972	6713636	AT5G19855_AtRbcX2,RbcX2	.	-	75.82	31.39
chr1	1671936	1673856	AT1G05600_EMB3101	.	+	49.23	20.38
chr1	20101445	20103667	AT1G53840_ATPME1,PME1	.	+	51.54	21.34
chr1	22071292	22073147	AT1G59960_	.	-	40.55	16.79
chr3	7667027	7668724	AT3G21760_HYR1	.	+	50.35	20.85
chr2	18437333	18438565	AT2G44730_	.	-	86.08	35.65
chr1	4794756	4796597	AT1G13990_	.	+	65.58	27.16
chr2	19344635	19345345	AT2G47110_UBI6,UBQ6	.	+	165.85	68.7
chr3	19465499	19467386	AT3G52500_	.	-	63.66	26.37
chr5	26930939	26933093	AT5G67480_ATBT4,BT4	.	-	42.5	17.61
chr3	1764318	1767620	AT3G05910_	.	-	60.17	24.95
chr2	18859599	18862918	AT2G45810_	.	+	73.62	30.53
chr3	18095825	18096661	AT3G48800_	.	-	127.32	52.81
chr4	8839414	8841276	AT4G15450_	.	+	44.84	18.6
chr1	12803708	12803986	AT1G34860_	.	-	5.58	2.31
chr3	6355664	6356153	AT3G18510_	.	+	30.66	12.72
chr1	7873867	7875878	AT1G22280_PAPP2C	.	+	59.59	24.73
chr5	506498	507244	AT5G02380_MT2B	.	-	46.65	19.36
chr3	23201117	23202913	AT3G62720_ATXT1,XT1,XXT1	.	+	59.04	24.51
chr2	10847375	10850532	AT2G25490_EBF1,FBL6	.	-	62.14	25.8
chr4	13163929	13165205	AT4G25910_ATCNFU3,NFU3	.	+	86	35.71
chr5	2775897	2777446	AT5G08565_	.	+	51.13	21.23
chr2	10063245	10064004	AT2G23672_	.	+	53.27	22.12
chr4	9260564	9262670	AT4G16400_	.	+	58.35	24.23
chr4	8852698	8854545	AT4G15490_UGT84A3	.	-	49.22	20.44
chr2	11856768	11858288	AT2G27820_ADT3,PD1	.	+	82.7	34.35
chr5	24950264	24953232	AT5G62130_	.	-	56.58	23.5
chr3	21098315	21100360	AT3G57020_	.	-	41.03	17.04
chr2	19574864	19580599	AT2G47800_ABCC4,ATMRP4,EST3,MRP4	.	+	54.19	22.51
chr5	9355980	9357436	AT5G26622_	.	-	43.33	18
chr4	9301388	9302022	AT4G16500_AtCYS4,CYS4	.	-	59.73	24.82
chr5	18045496	18046931	AT5G44730_	.	-	41.4	17.21
chr4	15914722	15918044	AT4G32980_ATH1	.	-	39.59	16.46
chr1	5298324	5300927	AT1G15410_	.	+	49.59	20.62
chr5	21043083	21044194	AT5G51795_	.	-	61.85	25.72
chr5	5031676	5033500	AT5G15500_	.	-	59.41	24.72
chr3	16068257	16069750	AT3G44430_	.	+	39.85	16.58
chr3	18011545	18014082	AT3G48610_NPC6	.	-	47.15	19.62
chr5	23384794	23388353	AT5G57710_SMAX1	.	+	64.42	26.81
chr3	20500335	20501709	AT3G55280_RPL23A2,RPL23AB	.	+	72.86	30.33
chr5	1360712	1363884	AT5G04720_ADR1-L2,PHX21	.	+	63.88	26.6
chr5	26057623	26061104	AT5G65210_TGA1	.	+	38.52	16.04
chr2	18807538	18811047	AT2G45660_AGL20,ATSOC1,SOC1	.	-	48.47	20.19
chr1	27274065	27276317	AT1G72450_JAZ6,TIFY11B	.	-	49.37	20.57
chr5	7749070	7750544	AT5G23090_NF-YB13	.	+	69.86	29.11
chr2	11120869	11122059	AT2G26110_	.	+	76.45	31.86
chr1	5559579	5562113	AT1G16260_	.	-	48.61	20.26
chr3	9274335	9276685	AT3G25540_LOH1	.	+	46.25	19.28
chr3	16361370	16364610	AT3G44820_	.	-	36.99	15.42
chr1	20413135	20414574	AT1G54680_	.	+	48.96	20.42
chr5	3398951	3400156	AT5G10750_	.	+	94.57	39.45
chr4	16801987	16804995	AT4G35310_ATCPK5,CPK5	.	+	72.44	30.22
chr4	8367887	8369167	AT4G14580_CIPK4,SnRK3.3	.	-	57.58	24.02
chr1	28500	28706	AT1G01046_MIR838A	.	+	32.75	13.66
chr2	17776241	17777717	AT2G42690_	.	-	91.19	38.05
chr4	232928	233645	AT4G00530_	.	-	64.08	26.75
chr5	26854022	26856006	AT5G67300_ATMYB44,ATMYBR1,MYB44,MYBR1	.	+	66.67	27.84
chr2	9350543	9353231	AT2G21940_ATSK1,SK1	.	+	42.32	17.67
chr3	22887889	22891435	AT3G61830_ARF18	.	+	46.3	19.34
chr1	877648	877719	AT1G03515_	.	+	28.54	11.92
chr2	9803217	9803288	AT2G23020_	.	-	10.59	4.42
chr5	9684072	9685561	AT5G27420_ATL31,CNI1	.	+	50.28	21.01
chr5	26937813	26938451	AT5G67510_	.	-	158.2	66.12
chr1	25477670	25478803	AT1G67940_ABCI17,ATNAP3,AtSTAR1,NAP3,NAP3	.	+	55.61	23.24
chr1	10429976	10432034	AT1G29790_	.	+	92.9	38.84
chr3	21742071	21746324	AT3G58790_GAUT15	.	-	30.84	12.89
chr4	17338871	17339077	AT4G36791_	.	-	37.08	15.5
chr2	1045452	1047684	AT2G03470_	.	-	54.59	22.83
chr1	17973697	17976389	AT1G48620_HON5	.	-	90.73	37.95
chr2	228745	229237	AT2G01505_CLE16	.	-	37.63	15.74
chr5	4423695	4427058	AT5G13710_CPH,SMT1	.	-	39.85	16.67
chr1	11911679	11913947	AT1G32870_ANAC013,ANAC13,NAC13	.	+	60.13	25.16
chr3	16036183	16036880	AT3G44380_	.	-	41.71	17.46
chr5	6760284	6762094	AT5G20010_ATRAN1,RAN-1,RAN1	.	+	64.65	27.07
chr2	4304947	4305887	AT2G10931_	.	-	49.84	20.87
chr3	19312684	19314731	AT3G52072_	.	-	48	20.1
chr3	6749485	6751017	AT3G19470_	.	+	38.64	16.18
chr1	10308574	10309798	AT1G29465_	.	+	57.44	24.06
chr4	18257336	18258680	AT4G39200_	.	+	89.78	37.61
chr5	16580044	16584008	AT5G41410_BEL1	.	+	39.91	16.72
chr2	6709260	6711156	AT2G15390_atfut4,FUT4	.	-	38	15.92
chr2	13002742	13005600	AT2G30520_RPT2	.	-	53.1	22.25
chr5	2060501	2061956	AT5G06690_WCRKC1	.	-	44.53	18.66
chr5	8723958	8725771	AT5G25210_	.	+	38.66	16.2
chr1	17485650	17486463	AT1G47580_DYW1	.	+	44.07	18.47
chr5	18835618	18839546	AT5G46450_	.	+	53.25	22.32
chr5	15424038	15426470	AT5G38530_TSBtype2	.	+	41.91	17.57
chr4	8406335	8407845	AT4G14660_NRPE7	.	-	52.52	22.03
chr4	12383311	12384496	AT4G23770_	.	-	54.02	22.66
chr4	6818087	6819042	AT4G11175_	.	+	88.02	36.93
chr4	16480934	16483995	AT4G34480_	.	-	37.68	15.81
chr3	1488595	1491320	AT3G05220_	.	+	42.11	17.67
chr1	29567106	29568859	AT1G78600_BBX22,DBB3,LZF1,STH3	.	+	70.86	29.74
chr1	27241807	27242827	AT1G72360_AtERF73,ERF73,HRE1	.	+	52.87	22.19
chr3	3264348	3267090	AT3G10480_ANAC050,NAC050	.	+	46.17	19.38
chr2	15591101	15592104	AT2G37100_	.	+	51.65	21.69
chr4	18273899	18275079	AT4G39260_ATGRP8,CCR1,GR-RBP8,GRP8	.	-	68.25	28.67
chr5	19406163	19407400	AT5G47930_	.	-	98.39	41.35
chr5	7358820	7359988	AT5G22210_	.	+	62.41	26.23
chr4	8336207	8336331	AT4G14504_MIR852A	.	+	35.5	14.92
chr2	868359	870385	AT2G02980_OTP85	.	+	52.31	21.99
chr2	18691722	18694725	AT2G45340_	.	+	49.73	20.91
chr1	1292080	1293357	AT1G04640_LIP2	.	+	42.21	17.75
chr4	6373097	6373536	AT4G10265_	.	-	31.13	13.09
chr1	26114112	26117797	AT1G69480_	.	-	43.91	18.47
chr1	25137111	25137937	AT1G67195_MIR414	.	-	35.21	14.81
chr5	19310192	19312438	AT5G47650_ATNUDT2,ATNUDX2,NUDT2	.	-	47.09	19.81
chr3	19025192	19026872	AT3G51240_F3'H,F3H,TT6	.	+	62.17	26.16
chr1	26612632	26616069	AT1G70580_AOAT2,GGT2	.	+	39.64	16.68
chr1	20451083	20452671	AT1G54830_NF-YC3	.	+	54.15	22.79
chr2	18159182	18162044	AT2G43850_	.	-	55.97	23.56
chr3	17359988	17362118	AT3G47160_	.	-	63.23	26.62
chr4	5550429	5551370	AT4G08685_SAH7	.	+	42.33	17.82
chr3	2052693	2055414	AT3G06590_AIF2	.	-	52.43	22.08
chr1	30140961	30142646	AT1G80130_	.	-	52.52	22.12
chr1	6377321	6378580	AT1G18540_	.	-	99.75	42.02
chr2	11818491	11819578	AT2G27720_	.	+	99.16	41.78
chr3	1621457	1623014	AT3G05590_RPL18	.	+	83.61	35.23
chr1	2454846	2457321	AT1G07920_	.	+	34.23	14.42
chr3	4650757	4653914	AT3G14050_AT-RSH2,ATRSH2,RSH2	.	-	75.08	31.65
chr2	16388886	16391073	AT2G39250_SNZ	.	-	36.48	15.38
chr2	13873436	13875831	AT2G32710_ACK2,ICK7,KRP4,KRP4	.	+	78.66	33.17
chr1	7828326	7830392	AT1G22180_	.	-	42.81	18.05
chr5	23420209	23424052	AT5G57800_CER3,FLP1,WAX2,YRE	.	+	42.76	18.03
chr3	16643	18840	AT3G01060_	.	-	53.38	22.51
chr4	1278530	1280031	AT4G02890_UBQ14	.	-	82.05	34.61
chr1	29418620	29418994	AT1G78190_	.	-	71.95	30.36
chr2	18820691	18822184	AT2G45685_	.	+	57.97	24.47
chr3	9641089	9642779	AT3G26310_CYP71B35	.	-	42.69	18.02
chr4	13067186	13069679	AT4G25620_	.	-	56.02	23.65
chr4	2816392	2818365	AT4G05530_IBR1,SDRA	.	+	53.39	22.54
chr2	10300115	10301787	AT2G24220_ATPUP5,PUP5	.	+	48.94	20.67
chr5	18764349	18769090	AT5G46270_	.	-	42.38	17.9
chr1	23185912	23188593	AT1G62630_	.	+	34.16	14.43
chr4	12837353	12839823	AT4G24972_TPD1	.	+	42.72	18.05
chr2	14265450	14267972	AT2G33730_	.	-	89.21	37.7
chr4	16271973	16274810	AT4G33950_ATOST1,OST1,P44,SNRK2-6,SNRK2.6,SRK2E	.	+	53.74	22.71
chr3	23190267	23195762	AT3G62700_ABCC14,ATMRP10,MRP10	.	-	58.13	24.57
chr5	21201730	21202543	AT5G52190_	.	-	83.43	35.27
chr5	26052245	26052644	AT5G65207_	.	-	19.88	8.4
chr2	10135605	10137561	AT2G23810_TET8	.	-	68.21	28.84
chr3	18717311	18718494	AT3G50440_ATMES10,MES10	.	-	47.85	20.23
chr1	11820908	11821710	AT1G32690_	.	-	28.93	12.23
chr5	21294187	21296704	AT5G52470_ATFBR1,ATFIB1,FBR1,FIB1,SKIP7	.	+	60.73	25.68
chr1	3945737	3946613	AT1G11700_	.	+	55.15	23.32
chr5	24453258	24455970	AT5G60790_ABCF1,ATGCN1,GCN1	.	-	73.47	31.07
chr4	8703075	8705378	AT4G15240_	.	-	72.23	30.57
chr5	23952261	23953707	AT5G59380_ATMBD6,MBD6	.	+	75.49	31.95
chr1	29915662	29916410	AT1G79529_	.	+	74.65	31.6
chr1	12023275	12024783	AT1G33140_PGY2	.	+	46.07	19.5
chr2	9549649	9550084	AT2G22482_	.	-	72.46	30.68
chr4	16980961	16982365	AT4G35840_	.	+	46.91	19.86
chr1	24997309	25001983	AT1G66980_GDPDL2,SNC4	.	-	43.43	18.39
chr2	11976303	11977913	AT2G28105_	.	+	38.78	16.43
chr1	4221863	4222837	AT1G12400_	.	+	43.28	18.34
chr3	23426749	23429154	AT3G63450_	.	-	57.71	24.46
chr1	24933856	24936322	AT1G66840_PMI2,WEB2	.	-	44.17	18.72
chr5	13588433	13591271	AT5G35370_	.	-	44.55	18.89
chr5	3854916	3856983	AT5G11950_LOG8	.	+	68.02	28.85
chr3	5252875	5254562	AT3G15530_	.	-	85.01	36.06
chr1	268330	269819	AT1G01720_ANAC002,ATAF1	.	+	68.39	29.01
chr4	13076444	13079052	AT4G25640_ATDTX35,DTX35,FFT	.	-	85.39	36.24
chr5	1767639	1769262	AT5G05870_UGT76C1	.	+	84.71	35.97
chr1	20704918	20706893	AT1G55450_	.	-	45.95	19.51
chr3	4495019	4495956	AT3G13720_PRA1.F3,PRA8	.	-	49.69	21.1
chr1	5448149	5448529	AT1G15825_	.	-	61.01	25.92
chr3	4544364	4547513	AT3G13810_AtIDD11,IDD11	.	+	34.69	14.74
chr5	4627140	4628703	AT5G14350_	.	-	42.53	18.08
chr1	26471078	26474786	AT1G70290_ATTPS8,ATTPSC,TPS8	.	-	55.44	23.57
chr2	17621156	17624841	AT2G42300_	.	+	41.76	17.76
chr5	16131654	16134916	AT5G40340_	.	-	49.23	20.94
chr4	15490740	15493423	AT4G32030_	.	+	46.66	19.85
chr3	21296554	21299591	AT3G57530_ATCPK32,CDPK32,CPK32	.	-	76.55	32.57
chr1	3460000	3461485	AT1G10500_ATCPISCA,CPISCA	.	-	66.3	28.21
chr3	3860285	3863050	AT3G12120_AtFAD2,FAD2	.	-	47.36	20.15
chr2	16747940	16749545	AT2G40110_	.	+	52.2	22.21
chr4	14954320	14954968	AT4G30650_	.	+	40.66	17.3
chr1	28776846	28778467	AT1G76680_ATOPR1,OPR1	.	+	43.03	18.31
chr5	10043914	10045975	AT5G28050_GSDA	.	-	76.86	32.72
chr4	10337205	10338612	AT4G18830_ATOFP5,OFP5	.	+	52.07	22.17
chr1	20167629	20169600	AT1G54030_ERMO3,GOLD36,MVP1,NUC	.	+	67.05	28.56
chr3	3239180	3242537	AT3G10420_SPD1	.	+	68.1	29.02
chr2	758693	761013	AT2G02710_PLP,PLPA,PLPB,PLPC	.	-	75.86	32.34
chr1	23696962	23698708	AT1G63850_	.	+	83.74	35.7
chr4	8873355	8875344	AT4G15540_UMAMIT38	.	+	67.81	28.91
chr2	388055	389918	AT2G01860_EMB975	.	+	58.05	24.75
chr1	21253817	21255931	AT1G56690_	.	+	52.75	22.49
chr5	657786	659733	AT5G02870_	.	+	130.81	55.78
chr4	10481786	10483857	AT4G19170_CCD4,NCED4	.	+	68.9	29.38
chr1	18757148	18758433	AT1G50640_ATERF3,ERF3	.	-	104.76	44.68
chr2	5906550	5908374	AT2G14045_	.	+	51.26	21.86
chr3	733387	734483	AT3G03180_	.	+	48.28	20.59
chr3	21559893	21561465	AT3G58200_	.	-	40.04	17.08
chr1	22031413	22032132	AT1G59860_	.	+	58.25	24.86
chr1	19312078	19314145	AT1G51965_ABO5	.	-	65.18	27.82
chr2	18617862	18620150	AT2G45160_ATHAM1,HAM1,LOM1	.	-	85.11	36.33
chr5	14968991	14969509	AT5G37670_	.	+	44.65	19.06
chr5	19789067	19790334	AT5G48810_ATB5-B,ATCB5-D,B5,CB5-D,CYTB5-B	.	-	93.59	39.96
chr1	17432518	17435064	AT1G47500_ATRBP47C',RBP47C'	.	+	85.06	36.32
chr1	23448919	23450452	AT1G63220_	.	+	32.98	14.08
chr1	19638285	19640239	AT1G52710_	.	-	45.81	19.56
chr3	22758063	22760340	AT3G61490_	.	+	36.76	15.7
chr5	2206894	2209516	AT5G07120_SNX2b	.	-	62.62	26.75
chr1	24371387	24373798	AT1G65560_	.	-	49.48	21.14
chr2	15059763	15062122	AT2G35860_FLA16	.	+	58.23	24.88
chr2	1722481	1723831	AT2G04900_	.	+	56.17	24
chr5	7365532	7366778	AT5G22250_AtCAF1b,CAF1b	.	-	43.72	18.68
chr3	6725468	6727000	AT3G19400_	.	+	61.64	26.34
chr1	12441393	12443256	AT1G34160_	.	+	53.33	22.79
chr5	4828640	4830955	AT5G14930_SAG101	.	+	40.18	17.17
chr3	4592256	4594999	AT3G13920_EIF4A1,RH4,TIF4A1	.	-	64.48	27.56
chr1	11797248	11797285	AT1G32620_	.	-	36.41	15.56
chr5	769514	770385	AT5G03230_	.	+	61.29	26.2
chr1	9224145	9225775	AT1G26690_	.	-	82.47	35.27
chr3	4732893	4734609	AT3G14220_	.	+	54.47	23.3
chr5	23229407	23230638	AT5G57345_	.	-	42.03	17.98
chr1	21939752	21941784	AT1G59720_CRR28	.	-	72.5	31.02
chr1	29744670	29745815	AT1G79070_	.	-	59.9	25.63
chr4	5551315	5553151	AT4G08690_	.	-	46.44	19.87
chr5	16569377	16570177	AT5G41400_	.	-	42.6	18.23
chr2	17111445	17113636	AT2G41000_	.	+	84.81	36.3
chr5	8180118	8181027	AT5G24155_	.	-	44.18	18.91
chr5	715029	716321	AT5G03050_	.	-	53.4	22.86
chr2	17165191	17166025	AT2G41180_SIB2	.	+	36.43	15.6
chr3	21006750	21007565	AT3G56710_SIB1	.	-	40.9	17.52
chr5	16609153	16610692	AT5G41520_RPS10B	.	-	95.4	40.88
chr2	18007697	18008665	AT2G43340_	.	+	85.36	36.58
chr1	5997180	5998475	AT1G17455_ELF4-L4	.	+	56	24
chr2	9988754	9991695	AT2G23450_	.	-	55.86	23.94
chr2	14210032	14211588	AT2G33550_	.	-	41	17.57
chr1	22557602	22560687	AT1G61190_	.	+	37.89	16.24
chr5	1390034	1393930	AT5G04810_	.	+	67.37	28.88
chr1	900887	903003	AT1G03610_	.	+	62.49	26.79
chr1	27295336	27298556	AT1G72500_	.	-	62.2	26.67
chr5	18850776	18853843	AT5G46490_	.	+	36.01	15.44
chr1	28881814	28884566	AT1G76900_AtTLP1,TLP1	.	+	54.56	23.4
chr1	9775528	9777810	AT1G28050_BBX13	.	-	62.76	26.92
chr1	30410701	30412289	AT1G80940_	.	+	73.81	31.67
chr1	16687637	16689502	AT1G43980_	.	-	55.63	23.87
chr3	5547718	5549660	AT3G16350_	.	+	54.74	23.49
chr1	29741748	29743600	AT1G79060_	.	+	70.86	30.41
chr2	16970230	16971234	AT2G40670_ARR16,RR16	.	+	34.72	14.9
chr4	10234667	10236045	AT4G18580_	.	-	39.79	17.08
chr2	17140229	17141431	AT2G41110_ATCAL5,CAM2	.	+	64.7	27.78
chr1	8906452	8908854	AT1G25390_	.	-	82.79	35.55
chr5	10856791	10858668	AT5G28830_	.	+	57.5	24.69
chr1	4459166	4460940	AT1G13080_CYP71B2	.	+	55.07	23.65
chr5	26352995	26353761	AT5G65880_	.	+	45.5	19.54
chr3	9269293	9271400	AT3G25520_ATL5,OLI5,PGY3,RPL5A	.	-	77.58	33.33
chr2	1014350	1017148	AT2G03340_WRKY3	.	-	66.99	28.78
chr3	6536715	6538658	AT3G18950_	.	+	52.44	22.53
chr4	12162004	12167026	AT4G23250_CRK17,DUF26-21,EMB1290,RKC1	.	-	41.31	17.75
chr3	8115177	8116253	AT3G22900_NRPD7	.	+	41.47	17.82
chr5	6718341	6718995	AT5G19875_	.	+	36.72	15.78
[truncated: 3,001 more rows]

## Sheet: a2.bed 
chr	START	END	GENE	NA	strand	H3K36me3 signal in WT	H3K36me3 signal in Sdg8 KO
chr1	27225897	27227545	AT1G72310_ATL3	.	+	56.26	32.88
chr3	19809687	19810469	AT3G53430_	.	-	178.12	104.12
chr1	27847047	27848806	AT1G74050_	.	-	92.36	53.99
chr3	22086478	22090444	AT3G59780_	.	+	52.35	30.6
chr5	19129640	19132283	AT5G47100_ATCBL9,CBL9	.	-	40.44	23.64
chr1	3189369	3190242	AT1G09815_POLD4	.	+	63.42	37.08
chr2	18025247	18031243	AT2G43410_FPA	.	-	46.13	26.97
chr1	22798069	22801073	AT1G61740_	.	-	22.7	13.27
chr1	25517411	25519440	AT1G68080_	.	+	41.8	24.44
chr4	6001351	6001761	AT4G09465_	.	+	2.23	1.3
chr1	1989479	1990730	AT1G06500_	.	+	47.97	28.05
chr3	21671433	21675090	AT3G58610_	.	+	63.51	37.14
chr2	3450578	3452044	AT2G07727_	.	+	0.52	0.3
chr4	8120718	8122417	AT4G14100_	.	+	62.46	36.53
chr5	25109991	25112001	AT5G62560_	.	+	68.01	39.78
chr3	677240	678084	AT3G03000_	.	+	45.58	26.66
chr3	5903453	5904613	AT3G17280_	.	-	35.75	20.91
chr3	17341512	17344645	AT3G47090_	.	-	27.22	15.92
chr1	6931012	6932689	AT1G19970_	.	-	52.85	30.92
chr2	19644100	19647180	AT2G48020_	.	+	28.87	16.89
chr2	1918289	1920042	AT2G05260_	.	+	50.88	29.77
chr2	14477715	14479988	AT2G34310_	.	-	70.54	41.29
chr4	16354946	16357293	AT4G34150_	.	+	68.67	40.2
chr5	19329675	19331329	AT5G47710_	.	+	71.67	41.96
chr2	18694816	18696657	AT2G45350_CRR4	.	-	48.3	28.28
chr1	4305933	4308005	AT1G12650_	.	+	62.08	36.35
chr3	20564236	20566329	AT3G55470_	.	+	34.14	19.99
chr5	435211	436897	AT5G02190_ATASP38,EMB24,PCS1	.	+	37.32	21.86
chr1	22997826	22999796	AT1G62260_MEF9	.	-	59.49	34.85
chr5	22652715	22656106	AT5G55930_ATOPT1,OPT1	.	+	30.32	17.76
chr1	29391827	29393334	AT1G78110_	.	+	29.5	17.28
chr1	29450563	29452417	AT1G78270_AtUGT85A4,UGT85A4	.	-	87.69	51.38
chr5	5821060	5822736	AT5G17670_	.	+	66.54	38.99
chr3	1140193	1141030	AT3G04300_	.	+	40.84	23.93
chr2	16069615	16070589	AT2G38360_PRA1.B4	.	-	111.7	65.46
chr1	10468054	10472211	AT1G29900_CARB,VEN3	.	+	66.34	38.88
chr1	2169982	2172194	AT1G07080_	.	+	97.01	56.86
chr4	12048186	12051796	AT4G22990_	.	-	38.17	22.37
chr1	5167031	5168264	AT1G14990_	.	-	67	39.27
chr5	760319	761803	AT5G03200_LUL1	.	-	65.48	38.38
chr5	8063985	8065523	AT5G23900_	.	-	64.89	38.04
chr3	10465516	10468911	AT3G28130_UMAMIT44	.	+	21.14	12.39
chr5	2841418	2845381	AT5G08720_	.	-	41.81	24.51
chr2	17097550	17098695	AT2G40970_MYBC1	.	-	61.99	36.35
chr1	5856573	5858550	AT1G17140_ICR1,RIP1	.	-	31.16	18.27
chr1	19670489	19670967	AT1G52825_	.	-	90.1	52.84
chr1	20180679	20182324	AT1G54060_ASIL1	.	+	103.83	60.9
chr5	7885591	7886785	AT5G23410_	.	-	6.57	3.85
chr4	16852074	16852947	AT4G35480_RHA3B	.	-	42.4	24.87
chr5	14723144	14726694	AT5G37190_CIP4	.	-	35.88	21.05
chr3	4525072	4526214	AT3G13780_	.	+	61.54	36.11
chr4	16760949	16767087	AT4G35240_	.	-	45.69	26.81
chr1	1167457	1168878	AT1G04360_	.	-	32.12	18.85
chr3	3450496	3453683	AT3G11010_AtRLP34,RLP34	.	-	23.89	14.02
chr2	6754330	6756051	AT2G15470_	.	+	1.54	0.9
chr4	357551	359194	AT4G00850_GIF3	.	+	56.69	33.28
chr2	11695032	11696630	AT2G27330_	.	-	61.16	35.91
chr1	20974161	20976291	AT1G56080_	.	-	34.61	20.32
chr4	8571833	8572489	AT4G15000_	.	+	159.6	93.72
chr3	682054	684069	AT3G03030_	.	+	30.35	17.82
chr5	4442014	4444935	AT5G13760_	.	+	62.19	36.52
chr3	16932112	16933726	AT3G46110_	.	+	33.23	19.52
chr3	23322956	23324247	AT3G63120_CYCP1;1	.	-	104.86	61.62
chr4	9773548	9775607	AT4G17530_ATRAB1C,ATRABD2C,RAB1C,RAB1C	.	-	72.91	42.85
chr5	13864852	13868238	AT5G35690_	.	-	59.04	34.7
chr3	16871681	16874311	AT3G45890_RUS1,WXR3	.	+	40.92	24.05
chr1	30135381	30136956	AT1G80110_ATPP2-B11,PP2-B11	.	+	38.13	22.41
chr5	26269856	26272899	AT5G65687_	.	-	37.16	21.84
chr5	25181415	25183729	AT5G62690_TUB2	.	+	80.69	47.43
chr5	84474	86275	AT5G01210_	.	+	32.36	19.02
chr4	6076992	6079102	AT4G09620_	.	-	68.47	40.25
chr5	24984236	24985711	AT5G62200_	.	-	78.22	45.99
chr5	1468575	1470772	AT5G04980_	.	-	26.4	15.52
chr1	5224385	5226702	AT1G15180_	.	+	53.64	31.54
chr4	2325003	2327013	AT4G04610_APR,APR1,ATAPR1,PRH19	.	+	53.52	31.47
chr1	2305378	2309544	AT1G07510_ftsh10	.	+	39.98	23.51
chr1	22603586	22604081	AT1G61280_	.	+	36	21.17
chr1	28532097	28533567	AT1G76020_	.	-	75.07	44.16
chr4	8084395	8086095	AT4G13990_	.	+	33.56	19.74
chr5	16807483	16810646	AT5G42020_BIP,BIP2	.	-	38.23	22.49
chr3	10133196	10136630	AT3G27390_	.	-	45.3	26.65
chr4	14041288	14043278	AT4G28390_AAC3,ATAAC3	.	-	32.48	19.11
chr2	13639016	13640370	AT2G32060_	.	-	101.48	59.72
chr4	17150869	17153578	AT4G36250_ALDH3F1	.	+	32.95	19.39
chr3	9753912	9754118	AT3G26561_	.	-	13.14	7.73
chr4	10038126	10042248	AT4G18120_AML3,ML3	.	+	39.13	23.03
chr2	7606757	7609278	AT2G17500_	.	+	26.74	15.74
chr5	17021310	17022583	AT5G42570_	.	-	75.45	44.42
chr1	10264395	10266818	AT1G29340_ATPUB17,PUB17	.	+	80.95	47.66
chr1	3076582	3079539	AT1G09530_PAP3,PIF3,POC1	.	+	48.32	28.45
chr2	18119956	18122889	AT2G43710_AtSSI2,FAB2,LDW1,SSI2	.	+	70.33	41.42
chr1	22581466	22585212	AT1G61240_	.	+	36.73	21.63
chr2	6355182	6357375	AT2G14800_	.	+	27.46	16.17
chr3	22997031	23000041	AT3G62110_	.	-	38.07	22.42
chr5	858536	858572	AT5G03445_	.	+	13.3	7.83
chr4	1408159	1412756	AT4G03200_	.	+	47.18	27.79
chr1	1992333	1993840	AT1G06510_	.	+	56.53	33.3
chr4	405673	407142	AT4G00950_MEE47	.	-	24.82	14.62
chr1	23036039	23039609	AT1G62310_	.	-	57.88	34.1
chr1	9329512	9330398	AT1G26920_	.	+	42.04	24.77
chr4	13985178	13987442	AT4G28190_ULT,ULT1	.	+	30.94	18.23
chr5	20764315	20768681	AT5G51070_CLPD,ERD1,SAG15	.	+	65.3	38.48
chr5	4432306	4436668	AT5G13740_ZIF1	.	+	50.96	30.03
chr5	5405350	5406887	AT5G16550_	.	+	75.29	44.38
chr5	25210495	25211607	AT5G62770_	.	+	43.11	25.41
chr3	9660065	9663298	AT3G26380_	.	+	32.88	19.38
chr2	12610543	12612894	AT2G29390_ATSMO2,ATSMO2-2,SMO2-2	.	-	55.63	32.8
chr3	19846647	19850968	AT3G53540_TRM19	.	-	35.87	21.15
chr5	5381113	5382897	AT5G16480_AtPFA-DSP5,PFA-DSP5	.	-	47.28	27.88
chr2	12523342	12524109	AT2G29125_DVL13,RTFL2	.	+	31.9	18.81
chr4	14714191	14720061	AT4G30100_	.	+	54.1	31.91
chr5	23451149	23452614	AT5G57910_	.	-	34.84	20.55
chr4	12419394	12420467	AT4G23885_	.	+	53.55	31.59
chr2	7845923	7846884	AT2G18050_HIS1-3	.	+	37.75	22.27
chr5	1188211	1188299	AT5G04275_EAT,MIR172,MIR172B	.	-	61.66	36.38
chr2	14056250	14060641	AT2G33170_	.	-	38.71	22.84
chr5	26296253	26298072	AT5G65720_ATNFS1,ATNIFS1,NFS1,NIFS1	.	+	118.47	69.91
chr3	20373718	20376522	AT3G54990_SMZ	.	-	26.98	15.92
chr5	22053969	22055430	AT5G54300_	.	-	29.86	17.62
chr3	21044317	21046314	AT3G56840_	.	+	76.04	44.88
chr3	7511468	7511620	AT3G21338_	.	+	10.29	6.07
chr3	23459182	23459804	AT3G63540_	.	-	79.47	46.91
chr2	9354842	9357091	AT2G21960_	.	+	75.35	44.48
chr3	190872	193537	AT3G01490_	.	-	27.83	16.43
chr1	23427409	23429603	AT1G63180_UGE3	.	-	23.46	13.85
chr1	18094900	18095046	AT1G48912_	.	+	15.38	9.08
chr3	7345436	7347104	AT3G20960_CYP705A33	.	+	26.52	15.66
chr3	21854719	21858204	AT3G59110_	.	+	51.41	30.37
chr1	3037754	3038408	AT1G09415_NIMIN-3	.	-	31.5	18.61
chr2	704918	706669	AT2G02590_	.	+	57.2	33.8
chr4	16548618	16550453	AT4G34670_	.	+	84.71	50.06
chr3	348167	350010	AT3G02040_AtGDPD1,GDPD1,SRG3	.	-	28.86	17.06
chr1	5058680	5061136	AT1G14700_ATPAP3,PAP3	.	+	28.69	16.96
chr1	2152852	2155269	AT1G07010_AtSLP1,SLP1	.	+	90.27	53.38
chr4	17682977	17686941	AT4G37640_ACA2	.	-	48.4	28.62
chr4	15573636	15574737	AT4G32260_PDE334	.	-	126.81	75
chr5	9689498	9690318	AT5G27440_	.	-	47.49	28.09
chr5	5690227	5692902	AT5G17300_RVE1	.	-	59.5	35.2
chr2	15617708	15619155	AT2G37180_PIP2;3,PIP2C,RD28	.	+	23.46	13.88
chr5	24120231	24121894	AT5G59880_ADF3	.	+	74.91	44.33
chr1	4481875	4483696	AT1G13150_CYP86C4	.	-	26.94	15.94
chr3	1408613	1411803	AT3G05050_	.	-	43.12	25.52
chr2	18756478	18757513	AT2G45530_	.	+	70.62	41.8
chr3	4712574	4714653	AT3G14200_	.	-	73.04	43.24
chr5	18840305	18842398	AT5G46460_	.	+	43.02	25.47
chr4	2116553	2118597	AT4G04330_AtRbcX1,RbcX1	.	-	21.15	12.52
chr1	27929662	27931364	AT1G74280_	.	+	51.47	30.48
chr4	122851	125591	AT4G00290_	.	-	48.58	28.77
chr3	865183	867008	AT3G03590_	.	-	51.18	30.31
chr3	20137741	20139142	AT3G54390_	.	-	41.3	24.46
chr3	21520974	21523327	AT3G58120_ATBZIP61,BZIP61	.	-	33.77	20
chr2	19366623	19368840	AT2G47170_ARF1A1C,BEX1	.	+	92.92	55.04
chr3	69854	71415	AT3G01202_	.	+	76.05	45.05
chr3	231651	235214	AT3G01610_CDC48C,emb1354	.	+	53.43	31.66
chr5	6610730	6612103	AT5G19590_	.	-	93.59	55.46
chr3	23326867	23328709	AT3G63140_CSP41A	.	-	64.82	38.42
chr3	4141051	4142548	AT3G12970_	.	-	39.34	23.32
chr3	20648942	20651388	AT3G55660_ATROPGEF6,ROPGEF6	.	-	23.62	14
chr1	23852748	23855566	AT1G64280_ATNPR1,NIM1,NPR1,SAI1	.	-	67.5	40.02
chr2	11187733	11191337	AT2G26280_CID7	.	-	72.98	43.27
chr5	26342116	26343321	AT5G65830_ATRLP57,RLP57	.	-	59.42	35.23
chr5	1715875	1716499	AT5G05710_	.	+	73.67	43.68
chr5	26868290	26869486	AT5G67350_	.	-	41.76	24.76
chr1	24965304	24967522	AT1G66920_	.	-	29.38	17.42
chr5	3459273	3461734	AT5G10950_	.	-	57.09	33.86
chr3	6097414	6099595	AT3G17820_ATGSKB6,GLN1.3,GLN1;3	.	+	52.13	30.92
chr1	30097401	30099846	AT1G80010_FRS8	.	+	58.6	34.76
chr2	12249679	12251668	AT2G28590_	.	+	38.15	22.63
chr3	20061528	20064154	AT3G54190_	.	-	68.37	40.56
chr1	27157875	27159558	AT1G72175_	.	+	65.7	38.98
chr1	17335849	17339273	AT1G47290_3BETAHSD/D1,AT3BETAHSD/D1	.	+	36.76	21.81
chr4	38504	40189	AT4G00110_GAE3	.	-	56.81	33.71
chr4	1562359	1564192	AT4G03520_ATHM2,TRXm2	.	-	88.55	52.56
chr2	16848438	16850487	AT2G40340_AtERF48,DREB2C	.	-	37.1	22.02
chr5	22396426	22397446	AT5G55210_	.	-	80.18	47.6
chr5	26261320	26263783	AT5G65683_WAVH2	.	+	44.62	26.49
chr4	13707240	13709149	AT4G27410_ANAC072,RD26	.	-	36.13	21.45
chr3	1339104	1340623	AT3G04860_	.	-	79.2	47.03
chr3	6404083	6407822	AT3G18610_ATNUC-L2,NUC-L2,PARLL1	.	-	25.13	14.92
chr4	13885191	13885263	AT4G27885_	.	-	24.81	14.73
chr3	17935609	17940746	AT3G48430_JMJ12,REF6	.	+	39.07	23.2
chr2	1533697	1535118	AT2G04410_	.	-	63.48	37.7
chr1	571955	574981	AT1G02660_	.	-	39.67	23.56
chr4	9609910	9612676	AT4G17100_	.	-	38.42	22.82
chr5	18176914	18181805	AT5G45050_ATWRKY16,TTR1,WRKY16	.	-	34.78	20.66
chr3	7323984	7324670	AT3G20900_	.	-	24.09	14.31
chr2	9266809	9266889	AT2G21670_	.	-	7.04	4.18
chr3	23210707	23210777	AT3G62735_	.	+	14.56	8.65
chr2	14309484	14310351	AT2G33830_AtDRM2,DRM2	.	-	32.76	19.47
chr1	10108710	10108781	AT1G28990_	.	+	72.75	43.25
chr5	86585	89986	AT5G01220_SQD2	.	-	44.34	26.36
chr2	8118830	8121925	AT2G18730_ATDGK3,DGK3	.	+	66.32	39.43
chr2	17756140	17758468	AT2G42620_MAX2,ORE9,PPS	.	+	96.03	57.1
chr3	21794445	21797006	AT3G58980_	.	-	29.25	17.39
chr1	30314536	30315819	AT1G80650_RTL1	.	+	54.37	32.33
chr2	10029275	10030382	AT2G23560_ATMES7,MES7	.	-	23.26	13.83
chr5	21020207	21022781	AT5G51750_ATSBT1.3,SBT1.3	.	+	27.49	16.35
chr1	8503234	8505460	AT1G24030_	.	+	40.55	24.12
chr2	1156713	1158934	AT2G03800_GEK1	.	+	68.46	40.73
chr3	22165654	22169572	AT3G60030_SPL12	.	-	53.5	31.83
chr5	26061229	26062682	AT5G65220_	.	+	99.08	58.96
chr2	11723525	11724362	AT2G27402_	.	+	23.06	13.72
chr1	19141973	19144294	AT1G51630_AtMSR2,MSR2	.	-	58.29	34.69
chr5	6009967	6014689	AT5G18190_	.	-	56.91	33.87
chr5	4866692	4869133	AT5G15030_	.	-	31.35	18.66
chr1	6824322	6825459	AT1G19740_	.	+	157.89	94.01
chr4	6803594	6806875	AT4G11160_	.	+	57.91	34.48
chr1	1009542	1011056	AT1G03940_	.	-	26.47	15.76
chr2	11041331	11043209	AT2G25900_ATCTH,ATTZF1	.	+	36.47	21.72
chr1	4758188	4759754	AT1G13920_	.	+	24.01	14.3
chr2	8942763	8945244	AT2G20760_	.	-	70.32	41.89
chr3	6191557	6194452	AT3G18080_BGLU44	.	+	39.91	23.78
chr5	25801528	25804980	AT5G64550_	.	-	47.71	28.43
chr5	25801528	25804980	AT5G64552_CPuORF22	.	-	47.71	28.43
chr3	5383596	5387009	AT3G15920_	.	-	53.17	31.69
chr1	515494	515566	AT1G02480_	.	+	7.27	4.33
chr5	23744876	23745981	AT5G58790_	.	+	50.91	30.35
chr5	18586980	18588543	AT5G45820_CIPK20,PKS18,SnRK3.6	.	-	32.88	19.6
chr5	26048065	26049952	AT5G65200_ATPUB38,PUB38	.	-	89.97	53.64
chr1	1234176	1236034	AT1G04530_TPR4	.	-	75.51	45.02
chr4	10460295	10464174	AT4G19120_ERD3	.	-	26.52	15.81
chr5	17684156	17686534	AT5G43940_ADH2,ATGSNOR1,GSNOR,HOT5,PAR2	.	+	94.01	56.06
chr3	23415589	23417119	AT3G63410_APG1,E37,IEP37,VTE3	.	-	99.32	59.23
chr1	4153652	4157644	AT1G12240_ATBETAFRUCT4,AtFRUCT4,AtVI2,FRUCT4,VAC-INV,VI2	.	+	28.09	16.75
chr1	3157501	3159148	AT1G09750_	.	+	45.44	27.1
chr2	16864495	16865442	AT2G40380_PRA1.B2	.	-	124.45	74.23
chr2	17728715	17731718	AT2G42580_TTL3,VIT	.	+	52.36	31.23
chr1	3744858	3745655	AT1G11175_	.	+	61.88	36.91
chr3	20952292	20954641	AT3G56550_	.	-	39.63	23.64
chr3	3304268	3306504	AT3G10572_APEM9	.	+	53.15	31.71
chr3	8177215	8179743	AT3G23020_	.	-	44.2	26.37
chr1	27717380	27719648	AT1G73700_	.	-	35.77	21.34
chr2	6533687	6536995	AT2G15080_AtRLP19,RLP19	.	+	28.63	17.08
chr2	13774588	13778026	AT2G32440_ATKAO2,CYP88A4,KAO2	.	+	26.18	15.62
chr5	2355937	2358194	AT5G07440_GDH2	.	+	38.91	23.22
chr3	17311672	17313752	AT3G46990_	.	+	63.27	37.76
chr5	13956690	13959753	AT5G35790_G6PD1	.	-	60.32	36
chr1	17395518	17397255	AT1G47420_SDH5	.	-	73.83	44.07
chr2	14929281	14930892	AT2G35550_ATBPC7,BBR,BPC7	.	+	31.13	18.58
chr4	10055696	10057736	AT4G18160_ATKCO6,ATTPK3,KCO6,TPK3	.	+	106.07	63.32
chr4	16860452	16862372	AT4G35510_	.	-	52.95	31.61
chr1	27432195	27433782	AT1G72900_	.	+	29.69	17.73
chr5	8370587	8372847	AT5G24520_ATTTG1,TTG,TTG1,URM23	.	-	109.19	65.22
chr1	2002877	2003393	AT1G06540_	.	-	25.35	15.14
chr2	7459047	7460819	AT2G17120_CL-1,LYM2,LYP1	.	+	61.07	36.48
chr5	17929673	17934188	AT5G44510_TAO1	.	-	27.5	16.43
chr3	18901997	18904197	AT3G50860_	.	+	70.99	42.42
chr1	9403900	9406256	AT1G27090_	.	-	100.84	60.26
chr1	20235712	20237065	AT1G54200_	.	+	40.55	24.23
chr1	1945124	1946076	AT1G06380_	.	+	99.41	59.41
chr3	1775902	1776775	AT3G05937_	.	-	26.02	15.55
chr1	23954803	23956255	AT1G64510_	.	-	90.09	53.85
chr2	1480068	1482089	AT2G04280_	.	-	72.33	43.24
chr1	2966120	2967718	AT1G09190_	.	-	36.25	21.67
chr5	21009592	21010345	AT5G51720_At-NEET,NEET	.	+	32.57	19.47
chr1	7771670	7773154	AT1G22050_MUB6	.	+	50.37	30.13
chr5	613782	614313	AT5G02720_	.	-	44.38	26.55
chr4	13362556	13364935	AT4G26450_	.	+	39.65	23.72
chr4	7263599	7265812	AT4G12130_	.	+	55.54	33.23
chr3	18215788	18217848	AT3G49142_	.	-	50.14	30
chr4	6245961	6247768	AT4G09970_	.	+	57.42	34.36
chr1	29523982	29526284	AT1G78476_	.	+	29.58	17.7
chr3	5188374	5189697	AT3G15360_ATHM4,ATM4,TRX-M4	.	+	78.23	46.82
chr3	18879923	18881982	AT3G50790_	.	-	69.22	41.44
chr5	4785960	4787839	AT5G14800_AT-P5C1,AT-P5R,EMB2772,P5CR	.	-	73.72	44.14
chr1	5514317	5516027	AT1G16080_	.	+	90.19	54.01
chr1	5042323	5044294	AT1G14685_ATBPC2,BBR/BPC2,BPC2	.	+	49.73	29.78
chr5	6844714	6850154	AT5G20280_ATSPS1F,SPS1F,SPSA1	.	-	59.61	35.7
chr3	10870038	10877506	AT3G28860_ABCB19,ATABCB19,ATMDR1,ATMDR11,ATPGP19,MDR1,MDR11,PGP19	.	-	29.09	17.42
chr5	6225956	6228132	AT5G18670_BAM9,BMY3	.	+	71.56	42.86
chr2	9083906	9084375	AT2G21200_SAUR7	.	-	32.09	19.22
chr4	13904474	13907245	AT4G27940_ATMTM1,MTM1	.	+	59.58	35.69
chr5	24139939	24141867	AT5G59950_	.	+	92.16	55.21
chr5	4652980	4655973	AT5G14430_	.	+	81.57	48.88
chr3	1823099	1824216	AT3G06035_	.	-	36.6	21.93
chr5	18407388	18411967	AT5G45428_CPuORF24	.	+	54.87	32.88
chr2	14219623	14221861	AT2G33580_LYK5	.	-	62.31	37.34
chr1	4178359	4182593	AT1G12290_	.	-	48.86	29.28
chr5	19356356	19358125	AT5G47810_PFK2	.	-	48.85	29.28
chr4	10201672	10203469	AT4G18480_CH-42,CH42,CHL11,CHLI-1,CHLI1	.	-	84.08	50.4
chr3	21339302	21343796	AT3G57630_	.	-	28.26	16.94
chr5	24813729	24815443	AT5G61760_ATIPK2BETA,IPK2B,IPK2BETA	.	-	47.16	28.28
chr1	2304766	2305031	AT1G07500_SMR5	.	-	32.52	19.5
chr1	5425714	5426322	AT1G15760_	.	+	41.79	25.06
chr5	18095713	18097585	AT5G44820_	.	-	28.05	16.82
chr5	9275947	9278596	AT5G26667_PYR6	.	+	48.72	29.22
chr2	17271172	17274370	AT2G41440_	.	+	25.43	15.25
chr3	18249776	18253839	AT3G49220_	.	+	28.08	16.84
chr3	21069411	21070356	AT3G56910_PSRP5	.	-	59.18	35.51
chr1	20447316	20450861	AT1G54820_	.	+	23.3	13.98
chr3	9524725	9526407	AT3G26060_ATPRX,PRXQ	.	+	56.89	34.14
chr2	14223200	14224167	AT2G33585_	.	-	78.24	46.96
chr4	13718679	13723324	AT4G27430_CIP7	.	+	44.37	26.63
chr3	16917589	16920018	AT3G46060_ARA-3,ARA3,ATRAB8A,ATRABE1C,RAB8A,RABE1c	.	+	75.28	45.19
chr5	22291886	22293300	AT5G54880_	.	+	51.26	30.77
chr1	30052297	30053936	AT1G79900_ATMBAC2,BAC2	.	-	26.79	16.08
chr5	8339144	8343102	AT5G24430_	.	-	46.71	28.04
chr5	1590036	1590861	AT5G05365_	.	+	27.47	16.49
chr1	9668584	9671616	AT1G27760_ATSAT32,SAT32	.	+	63.11	37.89
chr4	460472	461085	AT4G01060_CPL3,ETC3	.	+	20.99	12.6
chr4	9866977	9869752	AT4G17740_	.	-	39.14	23.5
chr5	25276034	25277266	AT5G62980_FOLB2	.	+	65.03	39.05
chr1	9300873	9304328	AT1G26850_	.	-	54.9	32.97
chr1	27914699	27917083	AT1G74230_GR-RBP5	.	+	64.6	38.8
chr5	23959573	23960878	AT5G59410_	.	-	64.86	38.96
chr4	1415949	1417352	AT4G03210_XTH9	.	+	24.84	14.92
chr2	6649630	6652010	AT2G15300_	.	+	45.44	27.3
chr2	1185522	1188545	AT2G03890_ATPI4K,PI4K,UBDK	.	+	63.51	38.16
chr5	8008010	8009436	AT5G23740_RPS11-BETA	.	-	89.18	53.59
chr5	9304025	9304743	AT5G26720_	.	+	92.44	55.55
chr2	11140809	11143360	AT2G26170_CYP711A1,MAX1	.	+	23.25	13.97
chr1	6325642	6330098	AT1G18390_	.	+	29.22	17.56
chr3	9756191	9758633	AT3G26570_ORF02,PHT2;1	.	+	93.94	56.47
chr2	7590295	7594090	AT2G17480_ATMLO8,MLO8	.	-	38.78	23.31
chr5	793514	793717	AT5G03285_	.	+	45.19	27.17
chr4	8362184	8366653	AT4G14570_AARE,AtAARE	.	+	38.67	23.25
chr5	6070640	6072310	AT5G18340_	.	-	33.86	20.36
chr4	14579704	14581700	AT4G29780_	.	+	35.19	21.16
chr1	5673795	5675131	AT1G16590_ATREV7,REV7	.	+	42.47	25.54
chr2	12793340	12795913	AT2G29990_NDA2	.	-	73.65	44.3
chr2	7211112	7215553	AT2G16640_ATTOC132,TOC132	.	-	53.74	32.33
chr5	21713366	21717782	AT5G53480_AtKPNB1,KPNB1	.	+	63.28	38.07
chr2	19594187	19595001	AT2G47840_AtTic20-II,Tic20-II	.	-	111.64	67.17
chr1	6609325	6610613	AT1G19130_	.	-	67.97	40.9
chr1	6500848	6504413	AT1G18840_IQD30	.	-	24.98	15.03
chr3	3208239	3211294	AT3G10350_	.	+	41.66	25.07
chr1	7097293	7099695	AT1G20490_	.	-	40.94	24.64
chr3	8283090	8285081	AT3G23210_bHLH34	.	-	73.69	44.36
chr5	23844206	23844277	AT5G59055_	.	+	5.77	3.47
chr5	23680079	23681798	AT5G58590_RANBP1	.	-	72.63	43.73
chr1	29525501	29526363	AT1G78480_	.	-	36.21	21.8
chr3	4472562	4474378	AT3G13672_SINA2	.	-	30.58	18.41
chr5	2713413	2716179	AT5G08420_	.	+	81.55	49.11
chr5	4092953	4096975	AT5G12950_	.	+	34.46	20.75
chr3	2677118	2679179	AT3G08820_	.	-	33.12	19.95
chr3	5748570	5751297	AT3G16850_	.	+	56.15	33.83
chr1	17156607	17156678	AT1G45234_	.	+	34.24	20.63
chr1	3038631	3039326	AT1G09421_	.	+	25.39	15.3
chr3	20700392	20703083	AT3G55760_	.	+	50.04	30.16
chr1	10806985	10809188	AT1G30510_ATRFNR2,RFNR2	.	-	38.99	23.5
chr3	19417490	19419782	AT3G52370_FLA15	.	+	26.78	16.14
chr4	1873624	1875233	AT4G03940_	.	+	39.15	23.6
chr4	9676127	9678777	AT4G17270_	.	+	60.71	36.6
chr5	17425944	17428223	AT5G43400_	.	-	38.5	23.21
chr3	212518	216671	AT3G01540_ATDRH1,DRH1	.	-	59.34	35.78
chr5	5497643	5500845	AT5G16730_	.	+	44.41	26.78
chr1	16764405	16767685	AT1G44100_AAP5	.	-	23.63	14.25
chr1	19579886	19580686	AT1G52565_	.	-	29.73	17.93
chr2	18932019	18933507	AT2G46030_UBC6	.	-	71.47	43.11
chr1	22613063	22615943	AT1G61310_	.	-	22.55	13.6
chr4	17097565	17098879	AT4G36130_	.	+	113.36	68.39
chr5	22923922	22926963	AT5G56630_PFK7	.	+	47.04	28.38
chr2	13771296	13774502	AT2G32430_	.	+	27.93	16.85
chr3	3881000	3882804	AT3G12170_	.	+	24.63	14.86
chr5	7208643	7213894	AT5G21222_	.	+	49.68	29.98
chr3	2489387	2491087	AT3G07800_AtTK1a,TK1a	.	-	38.38	23.16
chr1	9446657	9448825	AT1G27190_	.	-	97.42	58.8
chr3	16868914	16871548	AT3G45880_	.	-	34.96	21.1
chr1	4367256	4368822	AT1G12810_	.	+	76	45.88
chr1	10944913	10949458	AT1G30820_	.	-	24.95	15.06
chr1	4709635	4709706	AT1G13720_	.	+	4.18	2.52
chr2	15502014	15507320	AT2G36910_ABCB1,ATPGP1,PGP1	.	+	50.91	30.74
chr3	22071948	22075416	AT3G59760_ATCS-C,OASC	.	-	43.54	26.29
chr2	5741820	5746793	AT2G13790_ATSERK4,BAK7,BKK1,SERK4	.	+	40.54	24.48
chr4	2227661	2229280	AT4G04470_PMP22	.	-	66.15	39.96
chr5	17579966	17581222	AT5G43750_NDH18,PnsB5	.	-	57.95	35.01
chr2	12004708	12006122	AT2G28160_ATBHLH029,ATBHLH29,ATFIT1,BHLH029,FIT1,FRU	.	+	31.6	19.09
chr1	25431586	25432990	AT1G67830_ATFXG1,FXG1	.	-	37.34	22.56
chr1	23863066	23866045	AT1G64300_	.	+	26.98	16.3
chr5	3280516	3282411	AT5G10440_CYCD4;2	.	-	29.61	17.89
chr3	18440003	18442198	AT3G49720_	.	-	58.93	35.61
chr4	7254049	7256406	AT4G12110_ATSMO1-1,SMO1-1	.	+	66.4	40.13
chr5	11022083	11024960	AT5G29000_PHL1	.	-	34.17	20.65
chr4	12431277	12433864	AT4G23920_ATUGE2,UGE2	.	+	53.74	32.48
chr5	7090704	7092539	AT5G20900_JAZ12,TIFY3B	.	+	72.5	43.82
chr1	8664153	8665289	AT1G24450_NFD2	.	+	59.07	35.71
chr1	23911119	23915229	AT1G64390_AtGH9C2,GH9C2	.	+	29.76	17.99
chr5	25262179	25263901	AT5G62950_	.	-	62.55	37.82
chr5	15750929	15752962	AT5G39350_	.	+	53.14	32.13
chr4	13075563	13075635	AT4G25631_U60.2F	.	+	24.81	15
chr5	7014669	7016698	AT5G20720_ATCPN21,CHCPN10,CPN10,CPN20,CPN21	.	+	74.37	44.98
chr4	9966990	9969232	AT4G17950_AHL13	.	-	81.84	49.5
chr5	26615083	26616990	AT5G66675_	.	-	83.09	50.26
chr4	18374736	18377240	AT4G39530_	.	-	38.24	23.13
chr5	625254	627124	AT5G02760_APD7	.	+	27.21	16.46
chr5	22310687	22312761	AT5G54960_PDC2	.	-	79.64	48.19
chr5	6160178	6163130	AT5G18550_	.	+	31.7	19.18
chr5	19275048	19277056	AT5G47510_	.	+	30.06	18.19
chr5	6840833	6842858	AT5G20270_HHP1	.	-	31.33	18.96
chr3	19199781	19204464	AT3G51770_ATEOL1,ETO1	.	-	49.76	30.12
chr1	17265701	17266536	AT1G46768_RAP2.1	.	-	27.84	16.85
chr2	10310648	10312328	AT2G24240_	.	+	49.19	29.78
chr1	27835131	27837317	AT1G74020_SS2	.	-	22.88	13.85
chr3	4519647	4521533	AT3G13770_	.	+	28.64	17.34
chr5	4404604	4407175	AT5G13660_	.	+	36.73	22.24
chr5	7263994	7265678	AT5G21280_	.	-	29.2	17.68
chr3	20452910	20454342	AT3G55170_	.	-	69.68	42.2
chr5	22609532	22612393	AT5G55860_	.	+	44.22	26.78
chr2	15022582	15023364	AT2G35736_	.	-	71.85	43.52
chr1	2736774	2743758	AT1G08620_PKDM7D	.	+	44.05	26.68
chr2	6491434	6493352	AT2G15020_	.	-	54.76	33.17
chr3	4346557	4350923	AT3G13380_BRL3	.	+	28.74	17.41
chr5	9820249	9823086	AT5G27730_	.	+	50.34	30.5
chr5	7261600	7263513	AT5G21970_	.	+	59.51	36.06
chr2	12590058	12591363	AT2G29310_	.	+	29.36	17.79
chr5	7825882	7826611	AT5G23230_NIC2	.	-	47.04	28.51
chr3	20666972	20668505	AT3G55690_	.	+	53.63	32.51
chr5	16366353	16369099	AT5G40850_UPM1	.	+	44.2	26.8
chr4	18542551	18543978	AT4G39990_ATGB3,ATRAB11G,ATRABA4B,RABA4B	.	+	75.66	45.89
chr5	3106320	3107829	AT5G09960_	.	+	65.24	39.57
chr3	749390	754159	AT3G03250_AtUGP1,UGP,UGP1	.	-	62.68	38.02
chr5	18742440	18743045	AT5G46230_	.	-	23.43	14.21
chr3	22187308	22188795	AT3G60080_	.	+	97.28	59.02
chr4	17569828	17571704	AT4G37370_CYP81D8	.	-	32.77	19.88
chr4	3939266	3940797	AT4G06701_	.	-	22.93	13.91
chr1	23301576	23303162	AT1G62914_	.	+	53.3	32.34
chr2	8830565	8831533	AT2G20480_	.	-	51.55	31.28
chr1	4741999	4742071	AT1G13840_	.	+	27.31	16.57
chr1	12046641	12050066	AT1G33230_	.	+	73.81	44.79
chr1	27111894	27114342	AT1G72040_AtdNK,dNK	.	-	65.48	39.74
chr2	10283621	10285000	AT2G24190_SDR2	.	-	30.12	18.28
chr4	12686459	12687650	AT4G24570_DIC2	.	+	55.39	33.62
chr3	3108810	3110026	AT3G10090_	.	-	68.02	41.29
chr1	298535	302315	AT1G01830_	.	-	44.99	27.31
chr5	25948973	25953823	AT5G64940_ATATH13,ATH13,ATOSA1,OSA1	.	+	67.9	41.22
chr4	13404465	13406245	AT4G26555_	.	-	63.65	38.64
chr2	11938265	11939653	AT2G28050_	.	-	59.18	35.93
chr3	22776401	22777225	AT3G61550_	.	+	44.11	26.78
chr2	7549775	7552201	AT2G17370_HMG2,HMGR2	.	+	38.28	23.24
chr5	23967313	23970945	AT5G59430_ATTRP1,TRP1	.	+	45.1	27.39
chr3	1365165	1367759	AT3G04940_ATCYSD1,CYSD1	.	+	54.45	33.07
chr4	17379175	17381780	AT4G36890_IRX14	.	-	90.93	55.23
chr5	313193	315000	AT5G01820_ATCIPK14,ATSR1,CIPK14,PKS24,SnRK3.15,SR1	.	-	42.94	26.08
chr1	4062462	4063337	AT1G12020_	.	-	34.13	20.73
chr4	14317256	14321567	AT4G29060_emb2726	.	+	48.97	29.75
chr3	18029659	18030133	AT3G48660_	.	+	27.31	16.59
chr5	16184650	16195651	AT5G40450_	.	-	26.4	16.04
chr5	19773277	19777242	AT5G48770_	.	-	32.19	19.56
chr4	12376194	12378024	AT4G23750_CRF2,TMO3	.	+	36.16	21.98
chr1	25777851	25779161	AT1G68660_	.	-	70.52	42.87
chr3	9761700	9765315	AT3G26590_	.	-	25.78	15.67
chr3	2129623	2130315	AT3G06750_	.	-	49.51	30.1
chr5	1444870	1449817	AT5G04930_ALA1	.	+	61	37.09
chr5	19252463	19254193	AT5G47460_	.	-	31.82	19.35
chr3	7991646	7993454	AT3G22550_	.	-	20.13	12.24
chr1	2249133	2250529	AT1G07320_EMB2784,PRPL4,RPL4	.	+	111.88	68.05
chr1	19044184	19044900	AT1G51360_ATDABB1,DABB1	.	+	138.28	84.11
chr2	7466841	7471262	AT2G17150_NLP1	.	-	30.27	18.41
chr4	10989952	10991709	AT4G20360_ATRAB8D,ATRABE1B,RABE1b	.	+	139.65	84.95
chr2	495570	497747	AT2G02060_	.	+	27.52	16.74
chr1	19864770	19867389	AT1G53280_AtDJ1B,DJ-1b,DJ1B	.	-	58.91	35.84
chr2	15169818	15171353	AT2G36160_	.	+	88.72	53.98
chr3	3857843	3859798	AT3G12110_ACT11	.	+	43.77	26.63
chr5	21226833	21230254	AT5G52280_	.	+	30.9	18.8
chr4	13980327	13980820	AT4G28162_	.	-	40.61	24.71
chr3	3835129	3836833	AT3G12040_	.	-	45.95	27.96
chr3	21288765	21293158	AT3G57520_AtSIP2,RS2,SIP2	.	-	41.02	24.96
chr1	11568665	11570387	AT1G32160_	.	+	84.33	51.32
chr5	395634	399041	AT5G02030_BLH9,BLR,HB-6,LSN,PNY,RPL,VAN	.	+	32.7	19.9
chr2	19090953	19093315	AT2G46510_AIB,ATAIB,JAM1	.	-	59.49	36.21
chr5	16291755	16293513	AT5G40700_	.	-	33.91	20.64
chr5	23077265	23080053	AT5G57030_LUT2	.	+	54.85	33.39
chr5	21765054	21767000	AT5G53580_AtPLR1,PLR1	.	-	67.62	41.17
chr5	16912333	16913930	AT5G42300_UBL5	.	-	80.83	49.22
chr1	4677027	4679812	AT1G13640_	.	-	56.47	34.39
chr1	10129035	10133961	AT1G29030_	.	-	39	23.75
chr4	2331677	2332800	AT4G04630_	.	-	29.23	17.8
chr5	3239617	3240870	AT5G10300_AtHNL,ATMES5,HNL,MES5	.	+	22.81	13.89
chr3	7962443	7963378	AT3G22450_	.	+	30.59	18.63
chr4	7769770	7773815	AT4G13350_NIG	.	-	64.22	39.12
chr1	2573848	2576714	AT1G08200_AXS2	.	-	68.83	41.93
chr2	15928591	15930794	AT2G38070_	.	+	43.71	26.63
chr4	10195537	10196796	AT4G18460_	.	-	66.85	40.73
chr1	19850031	19852127	AT1G53233_	.	+	62.63	38.16
chr2	10631531	10633663	AT2G25010_	.	+	50.74	30.92
chr4	10322156	10325816	AT4G18810_	.	-	47.63	29.03
chr3	6762764	6766588	AT3G19510_HAT3.1	.	-	41.08	25.04
chr1	7712898	7714443	AT1G21930_	.	+	55.38	33.76
chr1	3791454	3793883	AT1G11290_CRR22	.	-	33.04	20.14
chr1	16774865	16777247	AT1G44110_CYCA1;1	.	-	26.97	16.44
chr1	21727024	21728760	AT1G58470_ATRBP1,RBP1	.	+	68.87	42.01
chr1	25712588	25714807	AT1G68530_CER6,CUT1,G2,KCS6,POP1	.	-	36.38	22.19
chr2	15005205	15005789	AT2G35700_ATERF38,ERF38	.	+	46.41	28.31
chr2	528350	529108	AT2G02100_LCR69,PDF2.2	.	+	31.82	19.41
chr1	9955969	9956940	AT1G28370_ATERF11,ERF11	.	-	33.62	20.51
chr4	1419278	1423337	AT4G03230_	.	-	20.39	12.44
chr4	11941131	11943885	AT4G22730_	.	+	20.57	12.55
chr3	5946951	5948868	AT3G17365_	.	-	66.78	40.76
chr1	25307658	25311308	AT1G67530_	.	+	35.52	21.68
chr4	7287803	7289225	AT4G12240_	.	+	46.15	28.17
chr1	3033512	3035036	AT1G09400_	.	-	20.53	12.53
chr1	10324745	10326735	AT1G29530_	.	-	58.97	36
chr1	18870139	18872930	AT1G50920_	.	+	69.68	42.54
chr5	25387411	25390063	AT5G63380_	.	-	66.94	40.87
chr4	1523306	1523503	AT4G03438_MIR447C	.	-	10.52	6.42
chr5	21850179	21853011	AT5G53810_	.	-	31.94	19.5
chr3	797254	799148	AT3G03370_	.	-	28.48	17.39
chr3	4557321	4558579	AT3G13845_	.	-	57.23	34.95
chr2	19636867	19638678	AT2G47990_EDA13,EDA19,SWA1	.	-	80.7	49.29
chr5	26172131	26175033	AT5G65470_	.	+	40.77	24.9
chr2	14496328	14498389	AT2G34355_	.	+	40.03	24.45
chr1	28922666	28925404	AT1G76970_	.	-	48.29	29.5
chr3	4831288	4833599	AT3G14440_ATNCED3,NCED3,SIS7,STO1	.	-	49.86	30.46
chr3	4924777	4927434	AT3G14660_CYP72A13	.	+	68.78	42.02
chr4	9226122	9227953	AT4G16330_	.	-	42.38	25.89
chr5	4886114	4888788	AT5G15080_	.	+	57.45	35.1
chr1	10559561	10561423	AT1G30090_	.	-	58.56	35.78
chr1	2848348	2852270	AT1G08890_	.	+	24.21	14.79
chr3	22410365	22412608	AT3G60630_ATHAM2,HAM2,LOM2	.	-	79.21	48.41
chr5	25810115	25813335	AT5G64570_ATBXL4,XYL4	.	-	35	21.39
chr5	8533787	8535043	AT5G24840_	.	-	63.35	38.72
chr5	437460	438894	AT5G02200_FHL	.	+	25.69	15.7
chr1	4140948	4143605	AT1G12210_RFL1	.	+	31.43	19.21
chr1	4498881	4501613	AT1G13190_	.	+	54.01	33.02
chr4	10275462	10278491	AT4G18670_	.	-	39.29	24.02
chr5	6228165	6230537	AT5G18680_AtTLP11,TLP11	.	-	76.87	47
chr4	6314787	6319936	AT4G10120_ATSPS4F	.	+	36.15	22.11
chr3	23336092	23340317	AT3G63180_ATTKL,TKL	.	-	45.9	28.08
chr1	7566232	7569902	AT1G21590_	.	-	60.68	37.13
chr3	3944296	3945851	AT3G12400_ATELC,ELC	.	-	141.68	86.7
chr1	642752	644903	AT1G02880_TPK1	.	-	63.91	39.11
chr4	12350089	12351624	AT4G23710_VAG2,VATG2,VHA-G2	.	+	57.75	35.34
chr5	23449711	23450933	AT5G57900_SKIP1	.	-	90.67	55.49
chr3	16909363	16910820	AT3G46010_ADF1,atadf,ATADF1	.	-	75.32	46.1
chr4	16664822	16667718	AT4G35000_APX3	.	-	74.68	45.71
chr2	19022173	19027413	AT2G46340_SPA1	.	-	66.02	40.41
chr2	16221836	16223662	AT2G38820_	.	+	41.63	25.48
chr1	24503624	24504193	AT1G65870_	.	+	38.13	23.34
chr3	10380380	10383092	AT3G27960_KLCR2	.	-	27.07	16.57
chr5	23056080	23057742	AT5G56980_	.	-	25.87	15.84
chr4	10407440	10409012	AT4G19003_VPS25	.	-	64.5	39.5
chr4	4643840	4645338	AT4G07825_	.	+	52.45	32.12
chr3	19542931	19544264	AT3G52730_	.	-	93.07	57
chr2	8139881	8144430	AT2G18790_HY3,OOP1,PHYB	.	+	67.37	41.26
chr2	15135572	15136749	AT2G36050_ATOFP15,OFP15	.	-	38.14	23.36
chr5	22735915	22737311	AT5G56170_LLG1	.	+	74.18	45.44
chr2	8987666	8989416	AT2G20890_PSB29,THF1	.	+	100.77	61.73
chr1	26935982	26937607	AT1G71500_	.	+	101.4	62.12
chr2	12558051	12562348	AT2G29210_	.	+	53.59	32.83
chr5	19421384	19422533	AT5G47960_ATRABA4C,RABA4C,SMG1	.	-	30.11	18.45
chr5	24940396	24941974	AT5G62100_ATBAG2,BAG2	.	+	30.06	18.42
chr1	9501077	9503869	AT1G27360_SPL11	.	+	39.31	24.09
chr1	21414170	21417946	AT1G57820_ORTH2,VIM1	.	-	30.25	18.54
chr4	14786633	14790501	AT4G30200_VEL1,VIL2	.	-	55.22	33.85
chr3	23008755	23013909	AT3G62150_ABCB21,PGP21	.	-	32.4	19.86
chr4	7441764	7443754	AT4G12560_CPR1,CPR30	.	+	104.96	64.36
chr1	8117339	8122127	AT1G22930_	.	+	62.46	38.3
chr1	909811	909883	AT1G03640_	.	-	6.92	4.24
chr1	19484355	19487997	AT1G52320_	.	+	63.01	38.64
chr1	28942710	28944797	AT1G77010_	.	+	31.98	19.61
chr1	20541887	20545762	AT1G55050_	.	+	21.12	12.95
chr1	17717133	17719141	AT1G48030_mtLPD1	.	-	82.34	50.51
chr5	2682229	2683712	AT5G08335_ATICMTB,ATSTE14B,ICMTB	.	+	57.98	35.57
chr5	20030700	20032175	AT5G49400_	.	+	60.13	36.89
chr1	7094833	7097114	AT1G20480_	.	-	51.85	31.81
chr4	12381845	12383034	AT4G23760_	.	+	55.98	34.35
chr4	481597	484483	AT4G01120_ATBZIP54,GBF2	.	-	48.22	29.59
chr4	447941	450642	AT4G01030_	.	-	30.93	18.98
chr4	18501877	18504466	AT4G39870_	.	+	51	31.3
chr5	607190	607704	AT5G02690_	.	+	20.99	12.88
chr5	16452453	16452593	AT5G41109_	.	-	44.01	27.01
chr3	19527029	19531167	AT3G52680_	.	+	25.29	15.52
chr2	14589760	14591788	AT2G34650_ABR,PID	.	-	31.64	19.42
chr3	17838135	17838266	AT3G48201_MIR861A	.	-	73.11	44.88
chr2	9230268	9231508	AT2G21560_	.	-	20.61	12.65
chr1	24695640	24698914	AT1G66260_	.	-	59.86	36.75
chr2	18426546	18428357	AT2G44680_CKB4	.	-	93.13	57.18
chr5	793974	796182	AT5G03290_IDH-V	.	+	79.4	48.75
chr1	1141604	1143053	AT1G04270_RPS15	.	-	110.22	67.68
chr4	6799935	6801932	AT4G11150_emb2448,TUF,TUFF,VHA-E1	.	+	92.94	57.07
chr3	415393	417547	AT3G02230_ATRGP1,RGP1	.	+	62.01	38.08
chr5	22085998	22088017	AT5G54390_AHL,ATAHL,HL	.	+	68.05	41.79
chr4	17813545	17815178	AT4G37895_	.	+	48.64	29.87
chr3	8460045	8462815	AT3G23580_RNR2,RNR2A	.	+	58.77	36.1
chr1	26326381	26327831	AT1G69900_	.	-	24.68	15.16
chr2	11912212	11913297	AT2G27970_CKS2	.	-	33.68	20.69
chr5	26346314	26347610	AT5G65850_	.	+	57.74	35.48
chr5	8754553	8756948	AT5G25265_	.	-	62.38	38.34
chr1	2743761	2747967	AT1G08630_THA1	.	-	22.05	13.55
chr2	13827436	13829317	AT2G32580_	.	+	69.54	42.75
chr5	26896600	26897463	AT5G67410_	.	-	37.25	22.9
chr3	2942504	2944078	AT3G09580_	.	-	55.86	34.35
chr4	1073753	1075893	AT4G02450_	.	-	73.86	45.42
chr5	5561679	5565580	AT5G16910_ATCSLD2,CSLD2	.	+	28.51	17.53
chr3	1761205	1763984	AT3G05900_	.	-	48.46	29.8
chr1	18839107	18844559	AT1G50840_POLGAMMA2,PolIA	.	+	50.39	30.99
chr3	22197826	22201451	AT3G60110_	.	+	25.79	15.86
chr1	3611747	3614613	AT1G10850_	.	+	42.97	26.43
chr1	20729182	20731283	AT1G55530_	.	-	62.02	38.15
chr1	12027084	12030539	AT1G33170_	.	+	28.42	17.48
chr3	10694444	10696123	AT3G28540_	.	+	35.05	21.56
chr3	3680893	3684558	AT3G11670_DGD1	.	-	65.38	40.22
chr1	2276053	2277154	AT1G07410_ATRAB-A2B,ATRABA2B,RAB-A2B,RABA2b	.	+	29.88	18.38
chr4	13873708	13876528	AT4G27860_MEB1	.	+	32.74	20.14
chr1	28005365	28007739	AT1G74510_	.	+	46.55	28.64
chr3	6032393	6033583	AT3G17640_	.	+	32.91	20.25
chr1	6184904	6187472	AT1G17970_	.	+	37.66	23.18
chr5	1279760	1281669	AT5G04490_VTE5	.	+	70.86	43.62
chr5	16977297	16979016	AT5G42450_	.	+	37.13	22.86
chr5	864281	865678	AT5G03460_	.	+	60.32	37.14
chr3	1266242	1268350	AT3G04670_ATWRKY39,WRKY39	.	-	62.08	38.23
chr2	583978	587124	AT2G02220_ATPSKR1,PSKR1	.	-	43.31	26.67
chr1	3395558	3396849	AT1G10360_ATGSTU18,GST29,GSTU18	.	-	27.93	17.2
chr3	4693361	4695604	AT3G14160_	.	+	43.58	26.84
chr5	4252842	4254894	AT5G13290_CRN,SOL2	.	-	38.03	23.43
chr4	8496031	8500152	AT4G14790_ATSUV3,EDA15	.	-	31.78	19.58
chr1	9355920	9357460	AT1G26960_AtHB23,HB23	.	+	25.45	15.68
chr1	30246745	30249305	AT1G80460_GLI1,NHO1	.	-	41.53	25.59
chr1	30036956	30041440	AT1G79840_GL2	.	+	26.99	16.63
chr4	690726	691993	AT4G01595_	.	-	52.27	32.21
chr2	14990325	14990935	AT2G35658_	.	-	34.5	21.26
chr4	1404887	1407139	AT4G03190_AFB1,ATGRH1,GRH1	.	-	58.35	35.96
chr2	2087145	2088130	AT2G05632_	.	-	27.15	16.73
chr2	12834993	12838626	AT2G30070_ATKT1,ATKT1P,ATKUP1,KT1,KUP1	.	+	44.16	27.22
chr5	16758709	16760576	AT5G41870_	.	-	63.68	39.26
chr5	20498476	20501680	AT5G50350_	.	-	38.46	23.71
chr5	3633667	3636570	AT5G11390_WIT1	.	+	36.38	22.43
chr1	819662	821317	AT1G03340_	.	+	32.62	20.12
chr1	5165628	5166745	AT1G14980_CPN10	.	-	78.96	48.71
chr1	26832335	26833709	AT1G71180_	.	+	45.6	28.13
chr1	26909835	26912597	AT1G71400_AtRLP12,RLP12	.	+	23.54	14.52
chr5	25613258	25615880	AT5G63990_	.	+	28.11	17.34
chr2	1161029	1164573	AT2G03810_	.	+	27.07	16.7
chr1	20286882	20290401	AT1G54350_ABCD2	.	+	36.32	22.41
chr1	27314932	27316669	AT1G72540_	.	-	30.63	18.9
chr1	1050553	1051186	AT1G04070_ATTOM22-I,TOM22-I	.	-	96.56	59.59
chr4	673862	676411	AT4G01550_ANAC069,NAC069,NTM2	.	-	59.6	36.78
chr4	15900270	15903268	AT4G32940_GAMMA-VPE,GAMMAVPE	.	-	74.94	46.25
chr5	6178354	6182761	AT5G18590_	.	-	39.76	24.54
chr4	237967	240500	AT4G00550_DGD2	.	-	46.58	28.75
chr1	8549518	8551993	AT1G24150_ATFH4,FH4	.	+	43.24	26.69
chr3	20070158	20072780	AT3G54220_SCR,SGR1	.	+	67.83	41.88
chr1	26093196	26097043	AT1G69420_	.	+	36.62	22.61
chr4	72552	75384	AT4G00180_YAB3	.	-	22.92	14.15
chr1	5548653	5550553	AT1G16220_	.	+	22.74	14.04
chr1	10092801	10092872	AT1G28780_	.	+	34.67	21.41
chr1	9089524	9092457	AT1G26270_	.	-	50.19	31
chr1	27784981	27786804	AT1G73880_UGT89B1	.	+	38.12	23.55
chr3	11075578	11075649	AT3G29095_	.	+	25.51	15.76
chr2	17734324	17739085	AT2G42600_ATPPC2,PPC2	.	-	52.11	32.2
chr3	6094098	6096566	AT3G17810_PYD1	.	+	70.39	43.5
chr4	1042338	1043206	AT4G02370_	.	+	123.52	76.35
chr3	3302102	3303839	AT3G10570_CYP77A6	.	+	33.52	20.72
chr2	8441527	8444170	AT2G19490_RECA2	.	+	37.93	23.45
chr3	684506	686544	AT3G03040_	.	+	54.15	33.48
chr1	19323382	19326916	AT1G51980_	.	-	60.78	37.58
chr1	25453921	25455735	AT1G67880_	.	-	72.75	44.99
chr1	5339961	5341931	AT1G15530_LecRK-S.1	.	-	75.48	46.68
chr2	10822370	10824916	AT2G25430_	.	+	82.85	51.24
chr2	12585856	12587742	AT2G29290_	.	+	28.72	17.76
chr3	19284339	19285582	AT3G51970_ASAT1,ATASAT1,ATSAT1	.	+	29.56	18.28
chr3	22105522	22106198	AT3G59840_	.	-	60.55	37.45
chr1	26932905	26935825	AT1G71490_	.	-	45.96	28.43
chr5	16161515	16165357	AT5G40390_RS5,SIP1	.	+	29.44	18.21
chr3	9878168	9878379	AT3G26818_MIR169M	.	-	16.46	10.18
chr3	18522510	18523906	AT3G49950_	.	+	38.7	23.94
chr2	15027589	15027668	AT2G35742_	.	-	22.87	14.15
chr2	18912260	18914739	AT2G45970_CYP86A8,LCR	.	-	30.27	18.73
chr1	4612243	4612929	AT1G13448_	.	+	21.35	13.21
chr5	3744980	3747125	AT5G11650_	.	+	83.11	51.44
chr1	22882215	22885053	AT1G61900_	.	-	60.75	37.6
chr2	17891504	17894633	AT2G43018_CPuORF17	.	+	45.52	28.18
chr2	16754939	16757592	AT2G40120_	.	-	29.32	18.15
chr1	22995437	22997613	AT1G62250_	.	-	33.05	20.46
chr2	12703537	12705181	AT2G29730_UGT71D1	.	+	21.71	13.44
chr4	8516531	8517079	AT4G14860_AtOFP11,OFP11	.	+	40.05	24.8
chr2	7671016	7673036	AT2G17650_	.	+	29.99	18.57
chr5	6578952	6581945	AT5G19500_	.	+	66.23	41.02
chr5	1837907	1840727	AT5G06100_ATMYB33,MYB33	.	+	52.36	32.43
chr2	18178588	18183871	AT2G43900_5PTase12	.	-	30.63	18.97
chr5	2955113	2956673	AT5G09510_	.	-	77.02	47.71
chr4	1358432	1359698	AT4G03070_AOP,AOP1,AOP1.1	.	+	36.55	22.64
chr2	951933	959188	AT2G03150_emb1579	.	+	53.35	33.05
chr1	24147044	24148689	AT1G65000_	.	+	59.12	36.63
chr1	22793219	22794703	AT1G61730_	.	-	104.07	64.49
chr5	21110340	21111348	AT5G51960_	.	+	64.5	39.97
chr5	20032463	20034001	AT5G49410_	.	+	35.26	21.85
chr2	12366748	12370684	AT2G28830_AtPUB12,PUB12	.	-	37.18	23.04
chr3	22435121	22435949	AT3G60690_SAUR59	.	+	32.71	20.27
chr4	10687198	10689617	AT4G19640_ARA-7,ARA7,ATRAB-F2B,ATRAB5B,ATRABF2B,RAB-F2B,RABF2B	.	-	72.45	44.91
chr3	11728113	11730239	AT3G29810_COBL2	.	+	23.46	14.54
chr1	24595774	24598518	AT1G66070_	.	-	52.38	32.47
chr1	19854615	19856937	AT1G53240_mMDH1	.	-	84.38	52.31
chr4	16560062	16562969	AT4G34710_ADC2,ATADC2,SPE2	.	-	35.62	22.08
chr2	19336695	19340869	AT2G47070_SPL1	.	+	62.33	38.64
chr5	8621954	8624337	AT5G25040_	.	+	68.52	42.48
chr4	16599605	16606027	AT4G34830_MRL1,PDE346	.	-	59.43	36.85
chr5	9050794	9054143	AT5G25930_	.	+	32.85	20.37
chr2	19039202	19042348	AT2G46380_	.	+	42.04	26.07
chr5	22671452	22673855	AT5G55990_ATCBL2,CBL2	.	+	45.02	27.92
chr5	3268847	3269550	AT5G10390_H3.1	.	-	37.49	23.25
chr5	7303622	7305797	AT5G22060_ATJ2,J2	.	-	68.52	42.5
chr3	6605476	6609295	AT3G19100_	.	+	35.23	21.85
chr1	12451451	12454142	AT1G34190_anac017,NAC017	.	+	86.39	53.59
chr3	6034198	6037229	AT3G17650_PDE321,YSL5	.	+	71.85	44.57
chr4	10875233	10878730	AT4G20110_BP80-3;1,VSR3;1,VSR7	.	+	20.01	12.41
chr1	26258939	26260751	AT1G69780_ATHB13	.	+	23.12	14.34
chr4	17358438	17361978	AT4G36860_	.	-	45.05	27.95
chr5	16589598	16592241	AT5G41460_	.	-	32.35	20.07
chr3	3981983	3985550	AT3G12560_ATTBP2,TRFL9	.	-	54.18	33.62
chr2	15750970	15751672	AT2G37530_	.	+	29.22	18.13
chr2	16655628	16658331	AT2G39890_ATPROT1,PROT1	.	+	42.27	26.23
chr2	15696155	15697402	AT2G37400_	.	-	78.98	49.02
chr1	29585677	29588302	AT1G78660_ATGGH1,GGH1	.	+	46.7	28.99
chr1	12144515	12147208	AT1G33470_	.	+	54.62	33.91
chr4	15176455	15178768	AT4G31240_AtNRX2,NRX2	.	-	22.52	13.98
chr2	17891503	17894635	AT2G43020_ATPAO2,PAO2	.	+	44.92	27.89
chr1	20424410	20430123	AT1G54730_	.	+	22.31	13.85
chr1	2608408	2609853	AT1G08280_	.	+	46.38	28.8
chr2	1936016	1937464	AT2G05320_	.	+	65.83	40.88
chr1	27643633	27645394	AT1G73530_	.	-	59.05	36.67
chr5	20491417	20495931	AT5G50340_	.	-	38.73	24.05
chr4	9771297	9773592	AT4G17520_	.	+	79.82	49.57
chr2	11926449	11929389	AT2G28000_CH-CPN60A,CPN60A,Cpn60alpha1,SLP	.	+	47.24	29.34
chr3	8084447	8085560	AT3G22840_ELIP,ELIP1	.	-	40.43	25.11
chr2	18451426	18452875	AT2G44750_TPK2	.	+	47.64	29.59
chr1	23886084	23887212	AT1G64355_	.	+	80.38	49.93
chr2	17328970	17331173	AT2G41550_	.	-	39.77	24.71
chr4	18122326	18124943	AT4G38830_CRK26	.	+	24.53	15.24
chr4	13575800	13578051	AT4G27050_	.	-	52.25	32.47
chr4	2385276	2387986	AT4G04700_CPK27	.	-	24.67	15.33
chr3	4403500	4406091	AT3G13510_	.	+	53.83	33.46
chr5	22097166	22099758	AT5G54430_ATPHOS32,PHOS32	.	-	102.72	63.86
chr1	26323111	26324616	AT1G69890_	.	-	29.52	18.35
chr4	769865	770835	AT4G01790_	.	+	22.41	13.93
chr2	4890080	4891424	AT2G12170_	.	-	21.91	13.62
chr4	17230589	17235518	AT4G36520_	.	-	41.8	25.99
chr3	1072092	1074160	AT3G04090_SIP1;1,SIP1A	.	-	75.68	47.06
chr3	19117584	19120881	AT3G51550_FER	.	-	65.67	40.84
chr3	4560655	4561570	AT3G13855_U6-26	.	+	14.46	8.99
chr1	8135213	8135920	AT1G22985_CRF7	.	-	79.44	49.42
chr1	7898013	7899879	AT1G22370_AtUGT85A5,UGT85A5	.	-	34.37	21.38
chr5	24358966	24363485	AT5G60600_CLB4,CSB3,GCPE,HDS,ISPG	.	+	49.96	31.08
chr4	11625362	11631078	AT4G21910_	.	-	26.14	16.26
chr2	9514936	9515535	AT2G22425_	.	+	112.11	69.76
chr1	2808883	2809747	AT1G08770_PRA1.E	.	+	79.6	49.53
chr4	16345281	16347133	AT4G34135_UGT73B2	.	-	31.02	19.3
chr2	16450660	16451878	AT2G39390_	.	-	93.14	57.96
chr5	24978844	24979849	AT5G62180_AtCXE20,CXE20	.	-	59.81	37.22
chr3	21125857	21127636	AT3G57080_NRPE5,RPB5B	.	+	68.51	42.64
chr3	2648509	2651160	AT3G08720_ATPK19,ATPK2,ATS6K2,S6K2	.	-	44.41	27.64
chr1	28728253	28728853	AT1G76560_CP12-3	.	+	46.64	29.03
chr5	2821928	2824966	AT5G08680_	.	+	81.35	50.64
chr1	24022285	24023196	AT1G64640_AtENODL8,ENODL8	.	-	41.11	25.59
chr3	69511	71362	AT3G01200_AtRP2,RP2	.	-	65.83	40.98
chr2	17731855	17733967	AT2G42590_GF14,GRF9	.	-	80.87	50.35
chr5	6562971	6565632	AT5G19460_atnudt20,NUDT20	.	+	52.86	32.91
chr4	567095	569088	AT4G01370_ATMPK4,MAPK4,MPK4	.	+	59.49	37.04
chr3	6465825	6467175	AT3G18773_	.	+	26.68	16.61
chr3	20246539	20248140	AT3G54690_SETH3	.	+	73.03	45.48
chr5	16826838	16827583	AT5G42092_	.	-	161.94	100.86
chr5	8116680	8118030	AT5G24020_ARC11,ATMIND1,MIND	.	+	111.94	69.73
chr2	15662567	15664599	AT2G37300_ABCI16	.	-	18.69	11.64
chr3	3705865	3708721	AT3G11720_	.	-	30.5	19
chr5	19306144	19307094	AT5G47630_mtACP3	.	+	57.14	35.6
chr4	9042897	9043337	AT4G15953_	.	+	17.48	10.89
chr5	1788767	1789438	AT5G05950_MEE60	.	+	142.36	88.72
chr1	27494121	27496878	AT1G73110_	.	-	39.1	24.37
chr3	5889872	5892252	AT3G17240_mtLPD2	.	-	68.96	42.99
chr5	15758717	15760686	AT5G39380_	.	-	19.06	11.88
chr5	19015233	19017063	AT5G46870_	.	+	38.4	23.94
chr2	8522678	8525093	AT2G19780_	.	-	31.15	19.42
chr1	23975085	23978335	AT1G64563_	.	-	41.09	25.62
chr5	2840628	2840728	AT5G08717_MIR166,MIR166D	.	+	13.7	8.54
chr4	8389040	8390833	AT4G14620_	.	-	60.25	37.58
chr4	8389040	8390833	AT4G14622_CPuORF60	.	-	60.25	37.58
chr2	18874760	18875586	AT2G45860_	.	-	71.02	44.3
chr1	10301152	10301951	AT1G29420_SAUR61	.	-	28.41	17.72
chr4	6218396	6218927	AT4G09890_	.	+	22.43	13.99
chr4	12144243	12144958	AT4G23205_	.	-	27.51	17.16
chr1	9862073	9864606	AT1G28230_ATPUP1,PUP1	.	-	23.07	14.39
chr3	19487129	19488556	AT3G52535_	.	+	24.4	15.22
chr1	25036616	25039389	AT1G67060_	.	+	53.89	33.62
chr5	4926094	4929502	AT5G15170_TDP1	.	-	38.34	23.92
chr3	23221845	23222995	AT3G62780_	.	-	39.46	24.62
chr4	14251214	14254432	AT4G28880_ckl3	.	+	66.51	41.5
chr2	14066463	14067467	AT2G33180_	.	+	26.06	16.26
chr2	15834867	15837001	AT2G37770_AKR4C9,ChlAKR	.	+	24.55	15.32
chr5	20110961	20111785	AT5G49560_	.	-	49.78	31.07
chr2	12673383	12676049	AT2G29650_ANTR1,PHT4;1	.	-	82.33	51.39
chr1	18748537	18751338	AT1G50620_	.	+	50.91	31.78
chr4	13736835	13738975	AT4G27480_	.	-	23.92	14.93
chr1	5899994	5903619	AT1G17255_	.	+	33	20.6
chr4	13402515	13404345	AT4G26550_	.	-	58.96	36.81
chr3	7058902	7063240	AT3G20250_APUM5,PUM5	.	-	58.33	36.42
chr2	12751147	12753117	AT2G29910_	.	-	69.6	43.46
chr4	8255700	8255771	AT4G14345_	.	+	12.24	7.64
chr4	15390650	15394430	AT4G31820_ENP,MAB4,NPY1	.	-	27.74	17.32
chr1	1159023	1159093	AT1G04320_	.	+	5.45	3.4
chr2	16940835	16943492	AT2G40570_	.	+	63.64	39.76
chr2	7640673	7640771	AT2G17556_	.	-	21.58	13.48
chr3	20489248	20493076	AT3G55260_ATHEX2,HEXO1	.	+	35.31	22.06
chr3	22671002	22672738	AT3G61250_AtMYB17,LMI2,MYB17	.	+	32.39	20.24
chr4	16348106	16349982	AT4G34138_UGT73B1	.	-	35.75	22.34
chr3	17428443	17429623	AT3G47300_SELT	.	-	63.92	39.95
chr3	1313316	1315243	AT3G04790_EMB3119	.	+	80.35	50.22
chr1	10384981	10387441	AT1G29700_	.	-	44.24	27.65
chr1	27589032	27590822	AT1G73380_	.	+	56.67	35.42
chr3	2757435	2758097	AT3G09032_	.	-	27.25	17.03
chr3	20612700	20615920	AT3G55580_	.	+	24.53	15.33
chr2	12697420	12698167	AT2G29700_ATPH1,PH1	.	+	121.44	75.93
chr2	2198271	2198405	AT2G05786_	.	-	7.17	4.48
chr2	17958230	17960536	AT2G43200_	.	+	60.32	37.72
chr5	8885088	8889620	AT5G25520_	.	+	56.08	35.07
chr3	18038648	18039876	AT3G48700_ATCXE13,CXE13	.	-	51.57	32.25
chr4	2030319	2031853	AT4G04210_PUX4	.	+	90.17	56.4
chr1	28461664	28462366	AT1G75810_	.	+	154.85	96.9
chr4	690710	692169	AT4G01593_	.	+	47.05	29.44
chr5	16670001	16674966	AT5G41690_	.	-	23.19	14.51
chr3	23406177	23406267	AT3G63375_MIR167B	.	+	11.11	6.95
chr5	8151924	8152867	AT5G24105_AGP41	.	+	22.07	13.81
chr2	15037662	15040127	AT2G35780_scpl26	.	-	65.67	41.1
chr3	19648861	19652508	AT3G52990_	.	+	58.65	36.71
chr4	10288798	10290850	AT4G18700_ATWL4,CIPK12,PKS8,SnRK3.9,WL4	.	-	95.02	59.48
chr3	19616021	19618449	AT3G52910_AtGRF4,GRF4	.	-	37.96	23.76
chr2	12196406	12196552	AT2G28507_	.	+	25.88	16.2
chr4	11878137	11878920	AT4G22550_LPPbeta	.	-	125.97	78.87
chr1	28098765	28101896	AT1G74790_	.	+	21.63	13.54
chr2	9627408	9631081	AT2G22660_	.	+	51.63	32.33
chr1	26485306	26487435	AT1G70310_SPDS2	.	-	75.21	47.1
chr1	19821337	19822252	AT1G53170_ATERF-8,ATERF8,ERF8	.	-	32.56	20.39
chr2	12613081	12615399	AT2G29400_PP1-AT,TOPP1	.	-	68.27	42.76
chr4	13865045	13866287	AT4G27840_	.	-	88.72	55.57
chr4	14312303	14314600	AT4G29040_RPT2a	.	+	91.84	57.53
chr4	17043112	17044396	AT4G36020_AtCSP1,CSDP1,CSP1	.	-	115.39	72.29
chr2	14275800	14277551	AT2G33760_	.	+	36.01	22.56
chr5	642071	642220	AT5G02811_	.	+	15.47	9.69
chr5	14007826	14011764	AT5G35840_PHYC	.	+	58.23	36.49
chr4	9496185	9497313	AT4G16880_	.	-	22.71	14.23
chr5	25200947	25202756	AT5G62740_ATHIR1,AtHIR4,HIR1,HIR4	.	+	53.66	33.63
chr2	9943053	9946269	AT2G23350_PAB4,PABP4	.	+	59.72	37.44
chr1	22936127	22939024	AT1G62050_	.	-	48.76	30.57
chr5	3825420	3827491	AT5G11870_	.	+	27.66	17.34
chr1	18953458	18954892	AT1G51170_AGC2-3,UCN	.	-	24.47	15.34
chr5	4757972	4762615	AT5G14740_BETA,CA18,CA2	.	+	20.29	12.72
chr5	15571254	15573526	AT5G38895_	.	+	57.19	35.86
chr5	9540925	9543871	AT5G27120_	.	+	47.86	30.01
chr2	11299144	11302191	AT2G26570_WEB1	.	+	44.01	27.6
chr2	17221933	17224427	AT2G41310_ARR8,ATRR3,RR3	.	+	46.93	29.44
chr5	15380945	15382035	AT5G38420_RBCS2B	.	-	29.11	18.26
chr3	19287878	19289330	AT3G51990_	.	+	88.97	55.82
chr2	13371658	13373606	AT2G31360_ADS2,AtADS2	.	-	24.91	15.63
chr2	18659235	18661294	AT2G45245_	.	-	30.5	19.14
chr3	18935674	18938799	AT3G50950_ZAR1	.	+	46	28.87
chr2	14435854	14435949	AT2G34186_	.	-	13.85	8.69
chr5	4526784	4529614	AT5G14030_	.	+	71.09	44.62
chr5	19301188	19301913	AT5G47610_	.	-	36.79	23.09
chr1	2827061	2829315	AT1G08830_CSD1	.	+	77.52	48.66
chr2	7541406	7544128	AT2G17340_	.	-	63.81	40.06
chr4	11211946	11213644	AT4G20960_PyrD	.	+	62.99	39.55
chr1	22678185	22679021	AT1G61470_	.	+	35.23	22.12
chr1	25464726	25470017	AT1G67900_	.	+	24.4	15.32
chr1	7878769	7881219	AT1G22300_14-3-3EPSILON,GF14,GRF10	.	-	73.22	45.98
chr3	16874402	16876083	AT3G45900_	.	-	77.74	48.82
chr1	413522	414645	AT1G02180_	.	-	34.94	21.94
chr1	23257726	23261966	AT1G62810_CuAO1	.	-	26.42	16.59
chr4	17336172	17338371	AT4G36790_	.	+	51.09	32.09
chr5	20333964	20336665	AT5G49980_AFB5	.	-	105.44	66.24
chr1	3112778	3116699	AT1G09620_	.	-	60.25	37.85
chr4	13982796	13983717	AT4G28180_	.	-	84.9	53.34
chr3	6926308	6929567	AT3G19910_	.	+	65.1	40.9
chr1	27339114	27340044	AT1G72610_ATGER1,GER1,GLP1	.	-	34.57	21.72
chr2	9623068	9624218	AT2G22640_ATBRK1,BRK1,HSPC300	.	+	76.31	47.95
chr2	17509069	17512954	AT2G41945_	.	-	40.17	25.24
chr2	19614698	19615769	AT2G47910_CRR6	.	+	82.46	51.82
chr1	10371839	10373766	AT1G29660_	.	+	24.08	15.13
chr4	11425957	11428386	AT4G21450_	.	+	83.46	52.45
chr1	5202648	5204193	AT1G15120_	.	+	73.34	46.09
chr4	10955159	10955584	AT4G20290_	.	-	29.09	18.28
chr4	16972598	16978057	AT4G35830_ACO1	.	-	66.93	42.07
chr5	25323102	25324272	AT5G63130_	.	+	42.81	26.91
chr1	27690359	27691814	AT1G73655_	.	-	79.09	49.72
chr4	9280020	9280854	AT4G16450_	.	+	98.15	61.71
chr4	8020951	8022260	AT4G13850_ATGRP2,GR-RBP2,GRP2	.	+	72.25	45.43
chr2	12769033	12770579	AT2G29960_ATCYP5,CYP19-4,CYP5	.	-	64.69	40.68
chr1	16486320	16488384	AT1G43710_ATSDC1,EMB1075,SDC1	.	-	87.55	55.07
chr1	29634124	29635813	AT1G78820_	.	-	37.33	23.48
chr2	15594030	15594961	AT2G37120_	.	-	73.27	46.09
chr5	8355951	8358873	AT5G24470_APRR5,PRR5	.	-	43.19	27.17
chr5	18407336	18411977	AT5G45430_	.	+	53.31	33.54
chr4	8413288	8415391	AT4G14680_APS3	.	-	30.55	19.22
chr3	5802536	5804157	AT3G17020_	.	-	86.6	54.49
chr2	18866061	18868542	AT2G45830_DTA2	.	+	21.57	13.57
chr1	10437657	10440786	AT1G29820_	.	+	20.95	13.18
chr1	28528077	28530790	AT1G76010_	.	-	70.47	44.35
chr1	6937795	6940582	AT1G20010_TUB5	.	-	29.63	18.65
chr2	970259	972407	AT2G03220_ATFT1,ATFUT1,FT1,MUR2	.	-	53.21	33.5
chr5	22967939	22971536	AT5G56790_	.	+	30.26	19.05
chr3	222968	223081	AT3G01572_	.	-	17.33	10.91
chr5	26939159	26941010	AT5G67520_APK4	.	+	51.8	32.62
chr3	7959754	7962200	AT3G22440_	.	+	93.2	58.7
chr5	17248290	17251134	AT5G43010_RPT4A	.	-	55.87	35.19
chr5	3057646	3058821	AT5G09830_BolA2	.	-	68.22	42.97
chr3	3081814	3088195	AT3G10010_DML2	.	-	34.31	21.61
chr1	3794238	3800719	AT1G11300_	.	+	20.61	12.98
chr1	11479866	11482890	AT1G31970_STRS1	.	+	63.48	39.99
chr2	7724885	7727404	AT2G17780_MCA2	.	-	24.37	15.35
chr1	1504960	1509152	AT1G05200_ATGLR3.4,GLR3.4,GLUR3	.	+	53.27	33.56
chr5	21433879	21438659	AT5G52882_	.	-	24.43	15.39
chr1	25478713	25480580	AT1G67950_	.	-	35.33	22.26
chr5	3567174	3571015	AT5G11200_UAP56b	.	+	50.31	31.7
chr1	2220253	2222982	AT1G07230_NPC1	.	-	61.1	38.5
chr4	6477876	6479165	AT4G10480_	.	-	100.4	63.27
chr5	21334793	21337002	AT5G52570_B2,BCH2,BETA-OHASE,CHY2	.	-	25.6	16.13
chr1	26101527	26105166	AT1G69440_AGO7,ZIP	.	-	29.01	18.28
chr5	25810298	25811733	AT5G64572_	.	+	40.18	25.32
chr5	5143053	5144053	AT5G15760_PSRP3/2	.	+	40.38	25.45
chr4	7321278	7322477	AT4G12340_	.	-	66.06	41.64
chr3	8457778	8459691	AT3G23570_	.	-	26.4	16.64
chr5	26538395	26541036	AT5G66460_AtMAN7,MAN7	.	-	24.73	15.59
chr5	7676938	7679179	AT5G22940_F8H	.	+	36.95	23.3
chr2	4805684	4807319	AT2G11910_	.	-	72.02	45.42
chr1	20944141	20946718	AT1G56000_	.	+	12.91	8.14
chr3	21444321	21446035	AT3G57920_SPL15	.	-	30.95	19.52
chr3	19723351	19726672	AT3G53230_AtCDC48B	.	+	27.24	17.18
chr4	15716232	15718858	AT4G32570_TIFY8	.	-	53.08	33.49
chr4	10152486	10155293	AT4G18375_	.	+	35.36	22.31
chr3	4169541	4172051	AT3G13030_	.	-	52.87	33.36
chr1	6331398	6333743	AT1G18400_BEE1	.	+	18.64	11.76
chr3	19626748	19629073	AT3G52930_AtFBA8,FBA8	.	-	57.68	36.4
chr3	19206768	19208310	AT3G51780_ATBAG4,BAG4	.	-	65.22	41.16
chr2	19487246	19489619	AT2G47490_ATNDT1,NDT1	.	+	82.74	52.23
chr1	5326290	5328874	AT1G15500_ATNTT2	.	+	73.69	46.52
chr5	8118317	8122784	AT5G24030_SLAH3	.	-	25.19	15.9
chr4	12214069	12214167	AT4G23375_MIR845B	.	-	16.05	10.13
chr1	17970678	17973303	AT1G48610_	.	-	51.02	32.21
chr1	26049478	26049551	AT1G69300_	.	+	19.77	12.48
chr2	6041253	6043974	AT2G14260_PIP	.	-	62.29	39.33
chr4	8047692	8050106	AT4G13930_SHM4	.	-	84	53.04
chr4	8827876	8831504	AT4G15430_	.	+	43.3	27.34
chr2	18537257	18538418	AT2G44940_	.	+	32.69	20.64
chr5	11380001	11381562	AT5G30495_	.	+	54.7	34.54
chr5	25836727	25839199	AT5G64640_	.	+	46.25	29.21
chr3	4037070	4039142	AT3G12700_NANA	.	+	29.45	18.6
chr2	163954	165290	AT2G01340_At17.1	.	+	26.52	16.75
chr1	9449549	9451750	AT1G27200_	.	-	82.23	51.95
chr5	24197998	24201404	AT5G60100_APRR3,PRR3	.	-	25.66	16.21
chr5	3648054	3652404	AT5G11430_	.	+	40.26	25.44
chr1	9259605	9261313	AT1G26770_AT-EXP10,ATEXP10,ATEXPA10,ATHEXP,EXP10,EXPA10	.	+	29.87	18.88
chr3	9279513	9282860	AT3G25560_AtNIK2,NIK2	.	-	22.04	13.93
chr1	22867770	22871280	AT1G61890_	.	-	25.85	16.34
chr2	1899507	1902802	AT2G05230_	.	-	1.54	0.97
chr1	5901169	5903439	AT1G17250_AtRLP3,RFO2,RLP3	.	-	29.39	18.58
chr5	6401239	6401309	AT5G19095_	.	+	6.98	4.41
chr3	23381645	23383538	AT3G63290_	.	+	45.55	28.8
chr5	2884179	2886863	AT5G09300_	.	-	44.25	27.98
chr1	885623	887956	AT1G03550_AtSCAMP4,SCAMP4	.	-	22.27	14.08
chr1	27437928	27439091	AT1G72920_	.	+	21.32	13.48
chr3	7160677	7162206	AT3G20510_	.	+	55.47	35.08
chr1	4105233	4109545	AT1G12110_AtNPF6.3,ATNRT1,B-1,CHL1,CHL1-1,NPF6.3,NRT1,NRT1.1	.	+	25.44	16.09
chr5	25706659	25710925	AT5G64270_	.	+	73.82	46.7
chr3	23244662	23246055	AT3G62880_ATOEP16-4	.	-	49.87	31.55
chr5	26423419	26425406	AT5G66080_APD9	.	-	29.11	18.42
chr5	22337701	22340100	AT5G55050_	.	+	24.54	15.53
chr5	1622172	1624270	AT5G05480_	.	-	44	27.85
chr3	3546646	3548856	AT3G11320_	.	-	63.35	40.1
chr4	17559580	17561727	AT4G37320_CYP81D5	.	-	28.85	18.26
chr5	22243800	22245770	AT5G54760_	.	+	77.99	49.37
chr1	3015328	3018234	AT1G09340_CRB,CSP41B,HIP1.3	.	+	61.53	38.95
chr4	11284147	11286767	AT4G21160_AGD12,ZAC	.	+	61.37	38.85
chr5	23470014	23474104	AT5G57990_UBP23	.	-	76.75	48.59
chr1	3676691	3678524	AT1G11020_	.	+	82.23	52.06
chr1	6064525	6066720	AT1G17630_	.	+	37.29	23.61
chr4	16905579	16908357	AT4G35640_ATSERAT3;2,SERAT3;2	.	-	20.74	13.13
chr5	7996456	7997479	AT5G23710_	.	-	89.24	56.51
chr5	22909685	22910821	AT5G56600_PFN3,PRF3	.	-	86.28	54.64
chr5	15965461	15967173	AT5G39865_	.	-	23.09	14.62
chr4	15141200	15143391	AT4G31140_	.	+	59.12	37.44
chr5	18391124	18395894	AT5G45380_ATDUR3,DUR3	.	+	25.12	15.91
chr5	309434	312097	AT5G01810_ATPK10,CIPK15,PKS3,SIP2,SNRK3.1	.	+	48.18	30.52
chr5	18075610	18079988	AT5G44790_HMA7,RAN1	.	-	53.34	33.79
chr2	17123190	17126349	AT2G41050_	.	-	38.37	24.31
chr5	23888793	23890427	AT5G59200_OTP80	.	-	39.44	24.99
chr1	18513628	18515099	AT1G49990_	.	+	28.25	17.9
chr2	13876774	13878531	AT2G32720_ATCB5-B,B5,CB5-B,CYTB5-D	.	-	52.77	33.44
chr5	9261580	9267729	AT5G26570_ATGWD3,OK1,PWD	.	+	48.36	30.65
chr3	11264147	11265532	AT3G29350_AHP2	.	-	66.77	42.32
chr3	5480464	5481379	AT3G16175_	.	+	23.18	14.69
chr3	8345771	8347062	AT3G23325_	.	+	49.24	31.21
chr1	18932937	18933950	AT1G51090_	.	+	23.32	14.78
chr3	8641569	8644449	AT3G23920_AtBAM1,BAM1,BMY7,TR-BAMY	.	+	61.24	38.82
chr1	20135112	20136970	AT1G53910_RAP2.12	.	+	67.42	42.74
chr1	7119676	7121817	AT1G20560_AAE1	.	-	65.98	41.83
chr4	871145	872913	AT4G01990_	.	-	53.36	33.83
chr4	17621593	17621820	AT4G37483_	.	-	17.48	11.08
chr2	11170418	11173142	AT2G26250_FDH,KCS10	.	-	32.44	20.57
chr1	21696165	21699118	AT1G58400_	.	-	24.13	15.3
chr2	8649434	8654450	AT2G20050_	.	-	55.9	35.45
chr2	10890903	10893772	AT2G25590_	.	+	47.02	29.82
chr3	19930861	19932892	AT3G53800_Fes1B	.	+	29.44	18.67
chr1	20309775	20310767	AT1G54410_AtHIRD11,HIRD11	.	-	29.69	18.83
chr3	3839102	3841466	AT3G12050_	.	+	93.22	59.13
chr4	5784074	5789002	AT4G09020_ATISA3,ISA3	.	+	49.11	31.15
chr1	9097984	9098667	AT1G26290_	.	+	42.55	26.99
chr1	4958514	4959325	AT1G14490_AHL28	.	-	54.45	34.54
chr1	9378559	9380692	AT1G27020_	.	+	23.74	15.06
chr3	3092023	3094945	AT3G10030_	.	-	75.94	48.19
chr1	9396658	9399453	AT1G27070_	.	-	54.84	34.8
chr1	1246728	1248775	AT1G04570_	.	-	34.93	22.17
chr5	21401349	21404385	AT5G52820_AtNLE,NLE	.	+	59.34	37.67
chr2	13642237	13644166	AT2G32080_PUR	.	-	90.43	57.41
chr5	26245249	26246379	AT5G65660_	.	-	25.3	16.06
chr5	13634454	13638297	AT5G35410_ATSOS2,CIPK24,SNRK3.11,SOS2	.	+	42.08	26.72
chr1	7925121	7927278	AT1G22450_ATCOX6B2,COX6B	.	+	77.87	49.45
chr5	4225005	4227613	AT5G13240_	.	-	66.28	42.09
chr3	1260906	1261683	AT3G04640_	.	-	21.78	13.83
chr3	8174858	8176645	AT3G23010_AtRLP36,RLP36	.	+	29.84	18.95
chr1	9779138	9782700	AT1G28060_	.	+	76.05	48.31
chr5	19179939	19181129	AT5G47230_ATERF-5,ATERF5,AtMACD1,ERF102,ERF5	.	+	33.17	21.07
chr3	8910770	8912196	AT3G24490_	.	+	79.07	50.24
chr1	16537511	16538091	AT1G43765_	.	+	32.03	20.35
chr1	9636594	9638577	AT1G27690_	.	+	76.86	48.84
chr4	15036052	15039281	AT4G30890_UBP24	.	-	56.21	35.72
chr1	30016368	30018231	AT1G79790_AtcpFHy1,FHY1	.	-	59.23	37.64
chr1	6305966	6308013	AT1G18330_EPR1,RVE7	.	-	20.57	13.07
chr3	6907395	6911233	AT3G19870_	.	+	55.18	35.07
chr1	23522497	23526832	AT1G63430_	.	+	52.11	33.12
chr3	9704142	9706161	AT3G26490_	.	+	27.03	17.18
chr1	1484067	1486960	AT1G05150_	.	-	65.49	41.63
chr1	27920328	27922414	AT1G74250_	.	+	56.98	36.22
chr1	392831	395528	AT1G02110_	.	+	40.57	25.79
chr5	26547995	26549677	AT5G66500_	.	-	33.05	21.01
chr1	8069487	8071562	AT1G22790_	.	+	54.72	34.79
chr1	710018	711803	AT1G03055_AtD27,D27	.	-	24.76	15.74
chr3	2144384	2145776	AT3G06790_MORF3	.	-	78.34	49.81
chr5	16817708	16817872	AT5G42053_	.	+	12.93	8.22
chr1	25559246	25561212	AT1G68190_BBX27	.	+	28.7	18.25
chr5	22558148	22560461	AT5G55730_FLA1	.	-	37.22	23.67
chr5	9033415	9034834	AT5G25890_IAA28,IAR2	.	+	20.82	13.24
chr1	18284335	18284947	AT1G49405_	.	-	39.87	25.36
chr1	9024345	9027786	AT1G26110_DCP5	.	-	76.98	48.98
chr3	18710871	18713649	AT3G50420_	.	-	35.71	22.72
chr3	18445730	18447646	AT3G49730_	.	-	47.92	30.49
chr1	2882524	2884337	AT1G08970_HAP5C,NF-YC9	.	+	63.65	40.5
chr1	3491281	3493737	AT1G10580_	.	-	96.72	61.55
chr4	16582183	16582879	AT4G34760_SAUR50	.	-	24.03	15.29
chr1	5206002	5209915	AT1G15130_	.	-	68.43	43.55
chr1	11372425	11373483	AT1G31760_	.	-	42.49	27.04
chr4	2327044	2328264	AT4G04614_	.	-	50.04	31.85
chr1	6255830	6257900	AT1G18180_	.	+	21.6	13.75
chr5	16985182	16988440	AT5G42480_ARC6	.	+	30.3	19.29
chr3	21419517	21422546	AT3G57830_	.	+	31	19.74
chr5	2577202	2578119	AT5G08040_TOM5	.	-	76.64	48.81
chr5	14992005	14993671	AT5G37740_	.	+	25.11	15.99
chr1	21310329	21311502	AT1G57540_	.	-	75.2	47.9
chr1	13122204	13125264	AT1G35580_A/N-InvG,CINV1	.	-	51.57	32.85
chr3	6710720	6713650	AT3G19370_	.	+	27.27	17.37
chr2	6865610	6866877	AT2G15760_	.	-	24.6	15.67
chr3	1676546	1678932	AT3G05690_ATHAP2B,HAP2B,NF-YA2,UNE8	.	-	64.16	40.88
chr3	21863420	21868701	AT3G59140_ABCC10,ATMRP14,MRP14	.	-	25.51	16.26
chr1	23650848	23655363	AT1G63750_	.	+	24.66	15.72
chr4	16812116	16814745	AT4G35360_	.	-	47.76	30.45
chr1	10190214	10194900	AT1G29170_ATSCAR3,SCAR3,WAVE2	.	-	29.06	18.53
chr2	17875005	17876588	AT2G42980_	.	-	45.82	29.22
chr5	806964	809779	AT5G03330_	.	+	58.06	37.03
chr2	17646900	17648945	AT2G42380_ATBZIP34,BZIP34	.	-	25.95	16.55
chr2	17012198	17013325	AT2G40765_	.	+	81.14	51.76
chr5	5178505	5181383	AT5G15860_ATPCME,ICME,PCME	.	-	58.22	37.14
chr5	19161142	19163797	AT5G47180_	.	-	63.36	40.42
chr3	5690020	5691543	AT3G16710_	.	+	63.26	40.36
chr4	1412785	1414902	AT4G03205_hemf2	.	+	35.28	22.51
chr1	18276707	18279528	AT1G49380_	.	+	40.68	25.96
chr4	10236225	10237185	AT4G18590_	.	+	68.38	43.64
chr5	372905	374954	AT5G01970_	.	-	31.73	20.25
chr1	27100284	27102262	AT1G71990_ATFT4,ATFUT13,FT4-M,FUCTC,FUT13	.	+	28.5	18.19
chr2	17230533	17231037	AT2G41342_	.	-	27.37	17.47
chr5	19470139	19472445	AT5G48040_	.	+	38.3	24.45
chr1	26588750	26591379	AT1G70530_CRK3	.	-	62.73	40.05
chr2	15795213	15797059	AT2G37660_	.	-	80.94	51.68
chr2	1538901	1541094	AT2G04430_atnudt5,NUDT5	.	+	39.52	25.24
chr5	2435875	2437499	AT5G07680_ANAC079,ANAC080,ATNAC4,NAC080,NAC4	.	+	24.02	15.34
chr4	13214746	13216461	AT4G26060_	.	-	76.22	48.69
chr1	1679158	1681710	AT1G05620_NSH2,URH2	.	+	21.81	13.93
chr3	2143488	2144521	AT3G06780_	.	+	107.4	68.62
chr1	8959186	8960848	AT1G25510_	.	-	50.99	32.58
chr4	16116447	16118797	AT4G33510_DHS2	.	+	72.49	46.32
chr5	8882468	8884834	AT5G25510_	.	-	53.88	34.43
chr1	10478005	10479048	AT1G29930_AB140,CAB1,CAB140,LHCB1.3	.	+	35.46	22.66
chr3	10326128	10328086	AT3G27860_	.	+	20.75	13.26
chr5	2430146	2432196	AT5G07670_	.	+	63.16	40.37
chr3	1852884	1855063	AT3G06130_	.	-	45.06	28.8
chr4	103823	105217	AT4G00238_	.	-	78	49.86
chr1	1853077	1855031	AT1G06110_SKIP16	.	-	79.03	50.52
chr3	5343016	5344700	AT3G15790_ATMBD11,MBD11	.	+	52.48	33.55
chr4	2461674	2464143	AT4G04870_CLS	.	-	39.98	25.57
chr3	4423349	4424883	AT3G13550_CIN4,COP10,EMB144,FUS9	.	-	68.79	44
chr4	11715776	11719828	AT4G22120_	.	-	26.61	17.02
chr2	8581358	8585478	AT2G19880_	.	+	54.99	35.18
chr3	3171222	3172966	AT3G10260_	.	-	80.13	51.27
chr1	27397216	27398500	AT1G72800_	.	+	22.32	14.28
chr4	13408422	13411070	AT4G26570_ATCBL3,CBL3	.	-	59.08	37.81
chr5	1746830	1748255	AT5G05810_ATL43	.	+	27.19	17.4
chr5	7116738	7122774	AT5G20960_AAO1,AO1,AOalpha,AT-AO1,ATAO,AtAO1	.	+	17.55	11.23
chr3	18741590	18744157	AT3G50500_SNRK2-2,SNRK2.2,SPK-2-2,SRK2D	.	-	63.2	40.46
chr1	24652795	24653938	AT1G66190_	.	-	32.55	20.84
chr3	5489701	5491248	AT3G16190_	.	-	59.86	38.33
chr1	19935163	19941088	AT1G53430_	.	+	25.08	16.06
chr5	23876586	23878429	AT5G59150_ATRAB-A2D,ATRABA2D,RABA2D	.	+	62.53	40.05
chr1	19097797	19101080	AT1G51500_ABCG12,AtABCG12,ATWBC12,CER5,D3,WBC12	.	-	30.26	19.38
chr3	17778356	17779549	AT3G48140_	.	+	86.74	55.56
chr2	14535645	14537432	AT2G34490_CYP710A2	.	-	30.43	19.49
chr3	4945601	4949042	AT3G14720_ATMPK19,MPK19	.	+	67.7	43.37
chr4	12535972	12539387	AT4G24150_AtGRF8,GRF8	.	+	26.32	16.86
chr1	4938824	4940903	AT1G14440_AtHB31,FTM2,HB31,ZHD4	.	-	24.35	15.6
chr5	24831619	24833902	AT5G61810_APC1	.	-	49.77	31.89
chr4	18560860	18563838	AT4G40050_	.	-	76.87	49.26
chr3	15207367	15209825	AT3G43230_	.	+	70.3	45.05
chr5	8367302	8368736	AT5G24500_	.	-	73.56	47.14
chr1	28577942	28581133	AT1G76160_sks5	.	-	31.49	20.18
chr1	20711514	20713310	AT1G55475_	.	+	58.05	37.21
chr5	26689056	26691114	AT5G66820_	.	+	70.98	45.51
chr4	16304124	16304196	AT4G34035_	.	+	14.68	9.41
chr4	17524461	17525159	AT4G37240_	.	+	36.36	23.32
chr3	5701011	5702541	AT3G16750_	.	-	54.97	35.26
chr3	10782276	10784447	AT3G28720_	.	+	90.89	58.31
chr3	9801214	9804282	AT3G26680_ATSNM1,SNM1	.	+	37.88	24.3
chr3	18450426	18451494	AT3G49750_AtRLP44,RLP44	.	-	40.31	25.86
chr1	5075213	5077791	AT1G14740_TTA1	.	-	93.4	59.93
chr2	7218706	7221625	AT2G16660_	.	-	29.49	18.92
chr2	14543997	14546879	AT2G34510_	.	-	28.04	17.99
chr5	21759367	21760578	AT5G53560_ATB5-A,ATCB5-E,B5,CB5-E	.	+	87.38	56.07
chr4	167959	170974	AT4G00380_FDM2,IDP2,INDL2	.	+	23.55	15.11
chr1	1237256	1239061	AT1G04540_	.	+	34.28	22
chr3	5852152	5853080	AT3G17160_	.	+	88.23	56.63
chr3	3622692	3622763	AT3G11505_	.	-	17.08	10.96
chr1	2672451	2674628	AT1G08460_ATHDA8,HDA08,HDA8	.	+	68.95	44.26
chr5	21200055	21201610	AT5G52180_	.	-	91.36	58.65
chr2	17028304	17028405	AT2G40802_	.	-	27.87	17.89
chr1	28194115	28195933	AT1G75110_RRA2	.	-	36.59	23.49
chr1	4226362	4229138	AT1G12420_ACR8	.	-	23.66	15.19
chr1	8536045	8537387	AT1G24140_	.	-	34.57	22.2
chr1	2160938	2163308	AT1G07040_	.	-	53.26	34.21
chr4	8545171	8548055	AT4G14950_KMS1	.	+	63.28	40.65
chr5	17733485	17733712	AT5G44065_	.	+	16.8	10.79
chr5	2326704	2330142	AT5G07360_	.	-	41.64	26.75
chr5	25570858	25571586	AT5G63905_	.	-	56.48	36.29
chr5	24371007	24374038	AT5G60640_ATPDI2,ATPDIL1-4,PDI2,PDIL1-4	.	-	68.72	44.16
chr1	25793207	25798257	AT1G68710_	.	-	30.44	19.56
chr1	9066636	9069238	AT1G26208_	.	-	20.59	13.23
chr2	14807449	14810229	AT2G35130_	.	-	31.06	19.97
chr2	114975	117640	AT2G01190_PDE331	.	+	101	64.95
chr1	24436901	24438542	AT1G65710_	.	-	25.6	16.46
chr3	23057245	23060731	AT3G62310_	.	-	66.23	42.59
chr3	3438278	3440809	AT3G10980_	.	+	76.16	48.98
chr1	20026147	20028635	AT1G53645_	.	-	64.7	41.61
chr1	2813061	2818008	AT1G08800_MyoB1	.	-	22.16	14.25
chr1	2216925	2219474	AT1G07220_	.	-	47.82	30.76
chr1	10106090	10106161	AT1G28930_	.	+	28	18.01
chr1	18519946	18521695	AT1G50020_	.	-	75	48.25
chr2	7907804	7909923	AT2G18170_ATMPK7,MPK7	.	-	60.56	38.96
chr4	154705	156376	AT4G00355_ATI2	.	+	77.75	50.02
chr5	9142865	9146525	AT5G26160_	.	+	51.83	33.35
chr4	15621301	15624923	AT4G32360_	.	+	51.56	33.18
chr5	26095147	26095771	AT5G65300_	.	-	31.36	20.18
chr5	5978678	5980376	AT5G18065_	.	+	39.64	25.51
chr1	27217477	27221123	AT1G72300_PSY1R	.	-	51.18	32.94
chr5	15974393	15976270	AT5G39890_	.	+	23.93	15.4
chr1	8244440	8251795	AT1G23230_	.	+	42.63	27.44
chr4	7459646	7462253	AT4G12620_ATORC1B,ORC1B,UNE13	.	-	30	19.31
chr2	8136758	8138118	AT2G18780_	.	-	28.94	18.63
chr1	20079081	20081455	AT1G53790_	.	-	32.17	20.71
chr3	16328792	16330265	AT3G44790_	.	+	22.88	14.73
chr1	11374893	11377794	AT1G31770_ABCG14	.	-	22.6	14.55
chr5	8535282	8538107	AT5G24850_CRY3	.	-	65.49	42.17
chr3	3422078	3423445	AT3G10940_LSF2	.	-	48.52	31.25
chr5	13900752	13902997	AT5G35735_	.	-	25.79	16.61
chr4	15140459	15140569	AT4G31136_	.	+	15.28	9.84
chr5	1551388	1553805	AT5G05230_	.	+	66.69	42.96
chr2	19679730	19681546	AT2G48120_PAC	.	+	24.36	15.69
chr1	23624666	23629112	AT1G63700_EMB71,MAPKKK4,YDA	.	-	47.72	30.74
chr4	5636489	5640636	AT4G08850_	.	-	53.26	34.31
chr3	1653264	1657159	AT3G05670_	.	+	59.51	38.34
chr3	4669253	4671575	AT3G14090_ATEXO70D3,EXO70D3	.	-	74.3	47.87
chr3	5140365	5141348	AT3G15270_SPL5	.	-	30.16	19.43
chr2	781847	784646	AT2G02780_	.	-	21.39	13.78
chr1	807361	810868	AT1G03290_	.	+	48.06	30.97
chr3	22818589	22822020	AT3G61670_	.	+	40.11	25.85
chr3	2079033	2083291	AT3G06650_ACLB-1	.	-	50.69	32.67
chr5	587508	588800	AT5G02610_	.	+	81.23	52.36
chr2	17323495	17325618	AT2G41530_ATSFGH,SFGH	.	-	76.62	49.39
chr1	29518316	29519323	AT1G78460_	.	-	33.85	21.82
chr1	28918810	28919545	AT1G76955_	.	-	22.34	14.4
chr5	287586	287734	AT5G01747_MIR164,MIR164B	.	+	36.82	23.74
chr5	21104571	21105947	AT5G51940_NRPB6A,NRPD6A,NRPE6A	.	+	61.06	39.38
chr2	9917520	9919258	AT2G23310_ATRER1C1	.	+	107.57	69.38
chr4	18395294	18397578	AT4G39620_ATPPR5,EMB2453	.	+	57.6	37.16
chr4	13382198	13383641	AT4G26500_ATSUFE,CPSUFE,EMB1374,SUFE1	.	-	93.85	60.56
chr1	3914629	3914700	AT1G11640_	.	-	15.61	10.07
chr2	7666585	7668065	AT2G17630_PSAT2	.	+	50.63	32.67
chr3	9124304	9126298	AT3G25040_ERD2B	.	+	65.6	42.34
chr4	17809681	17811590	AT4G37880_	.	+	62.36	40.25
chr5	4637312	4639756	AT5G14390_	.	-	60.17	38.84
chr1	2642214	2643285	AT1G08390_	.	+	58.37	37.68
chr2	13263579	13266560	AT2G31130_	.	-	59.59	38.47
chr4	11032332	11032754	AT4G20470_	.	-	27.48	17.74
chr1	24538886	24542129	AT1G65930_cICDH	.	+	52.86	34.13
chr3	44045	45590	AT3G01130_	.	-	55.49	35.83
chr3	16894163	16894236	AT3G45965_	.	+	7.53	4.86
chr3	20502612	20503797	AT3G55290_SDRd	.	+	23.46	15.15
chr5	19339703	19342361	AT5G47750_D6PKL2,PK5	.	-	51.11	33.01
chr2	19204185	19205112	AT2G46735_	.	+	22.73	14.68
chr5	24282838	24285033	AT5G60370_	.	+	56.66	36.6
chr4	5972924	5975071	AT4G09432_	.	-	38.6	24.94
chr1	27236875	27238612	AT1G72340_	.	+	75.26	48.63
chr1	3948714	3951359	AT1G11710_	.	+	56.86	36.74
chr5	1963072	1964314	AT5G06430_	.	-	57.68	37.27
chr3	2928811	2931228	AT3G09540_	.	-	27.75	17.93
chr4	12963382	12966448	AT4G25350_SHB1	.	-	24.7	15.96
chr1	11534682	11536338	AT1G32070_ATNSI,NSI	.	-	80.68	52.14
chr1	6803611	6805044	AT1G19670_ATCLH1,ATHCOR1,CLH1,CORI1	.	-	28.07	18.14
chr5	25681202	25683641	AT5G64200_At-SC35,ATSC35,SC35	.	-	83.48	53.96
chr4	16193422	16196428	AT4G33770_ITPK2	.	-	34	21.98
chr1	8480422	8481486	AT1G23965_	.	-	25.4	16.42
chr1	21089844	21092660	AT1G56340_AtCRT1a,CRT1,CRT1a	.	-	55.96	36.18
chr1	30358115	30359606	AT1G80780_	.	+	81.64	52.79
chr4	8517960	8520521	AT4G14880_ATCYS-3A,CYTACS1,OASA1,OLD3	.	-	73.45	47.5
chr2	18262210	18265346	AT2G44160_MTHFR2	.	+	62.68	40.54
chr2	5673688	5675831	AT2G13610_ABCG5	.	-	31.62	20.45
chr5	6017865	6019993	AT5G18210_	.	+	45.13	29.19
chr1	6100961	6101983	AT1G17744_	.	-	30.41	19.67
chr3	7402481	7405641	AT3G21110_ATPURC,PUR7,PURC	.	-	52.14	33.73
chr1	29073843	29074796	AT1G77370_	.	+	76.8	49.69
chr4	2533056	2535386	AT4G04960_LecRK-VII.1	.	+	58.96	38.15
chr3	1760905	1764212	AT3G05905_	.	+	41.79	27.04
chr5	3914468	3915968	AT5G12110_	.	+	38.05	24.62
chr5	883447	885425	AT5G03520_ATRAB-E1D,ATRAB8C,ATRABE1D,RAB-E1D,RAB8C	.	+	86.42	55.94
chr2	19043414	19044826	AT2G46400_ATWRKY46,WRKY46	.	-	30.45	19.71
chr5	17293227	17294789	AT5G43080_CYCA3;1	.	+	25.97	16.81
chr3	18340976	18342489	AT3G49470_NACA2	.	+	98.56	63.81
chr2	2215236	2217150	AT2G05812_	.	+	65.43	42.36
chr3	19654068	19656080	AT3G53000_AtPP2-A15,PP2-A15	.	+	79.45	51.44
chr2	6393332	6394938	AT2G14880_	.	-	93.78	60.72
chr4	18476007	18477943	AT4G39820_	.	-	89.96	58.25
chr2	13851062	13852080	AT2G32650_	.	+	36.79	23.82
chr3	3369580	3371227	AT3G10760_	.	+	103.87	67.26
chr3	3578388	3580569	AT3G11400_ATEIF3G1,EIF3G1	.	+	99.93	64.71
chr5	22233789	22237341	AT5G54730_ATATG18F,ATG18F,G18F	.	-	60.56	39.22
chr5	21894232	21896427	AT5G53930_	.	-	54.55	35.33
chr5	7383629	7385734	AT5G22310_	.	-	21.14	13.69
chr2	16896907	16901280	AT2G40460_	.	+	20.83	13.49
chr5	16979773	16981115	AT5G42460_	.	+	36.56	23.68
chr1	957261	957998	AT1G03800_ATERF10,ERF10	.	-	35.3	22.87
chr5	19302190	19304816	AT5G47620_	.	-	66.33	42.98
chr1	26005068	26007263	AT1G69170_AtSPL6,SPL6	.	+	55.25	35.8
chr1	2691080	2694377	AT1G08510_FATB	.	-	54.75	35.48
chr4	13554604	13557854	AT4G27000_ATRBP45C	.	-	88.1	57.1
chr2	632634	634919	AT2G02410_	.	+	58.97	38.22
chr1	5047803	5048612	AT1G14687_AtHB32,HB32,ZHD14	.	+	32.91	21.33
chr1	29660184	29664951	AT1G78900_VHA-A	.	+	67.65	43.85
chr3	9113875	9116188	AT3G25013_	.	+	49.52	32.1
chr3	10672041	10674395	AT3G28460_	.	-	29.02	18.81
chr1	1639286	1640811	AT1G05540_	.	+	23.45	15.2
chr4	16952963	16955277	AT4G35785_	.	-	63.61	41.24
chr1	29347581	29349755	AT1G78050_PGM	.	+	23.51	15.24
chr5	24683606	24686105	AT5G61410_EMB2728,RPE	.	-	79.78	51.73
chr4	10012361	10015815	AT4G18030_	.	-	53.22	34.51
chr4	10651744	10657282	AT4G19530_	.	+	26.51	17.19
chr5	7545516	7547595	AT5G22700_	.	-	31.35	20.33
chr1	2247509	2248961	AT1G07310_	.	-	143.99	93.39
chr1	5878400	5880041	AT1G17200_	.	+	27.51	17.84
chr4	10453415	10454359	AT4G19100_PAM68	.	+	69.53	45.1
chr5	23226086	23229282	AT5G57340_	.	+	17.47	11.33
chr5	16727530	16732847	AT5G41790_CIP1	.	+	31.71	20.57
chr1	22349892	22351668	AT1G60690_	.	-	55.46	35.98
chr3	5916940	5920188	AT3G17330_ECT6	.	-	54.55	35.39
chr3	19951488	19952961	AT3G53870_	.	+	100.18	65
chr1	8523247	8524929	AT1G24095_	.	+	33.91	22
chr5	21207888	21211986	AT5G52230_MBD13	.	-	39.35	25.53
chr5	9173517	9174542	AT5G26230_MAKR1	.	-	27.93	18.12
chr5	4277939	4279446	AT5G13340_	.	-	77.32	50.17
chr5	25132899	25134788	AT5G62610_	.	-	80.2	52.04
chr1	22642096	22645147	AT1G61370_	.	-	25.06	16.26
chr5	339838	340266	AT5G01881_	.	+	43.27	28.08
chr4	6836106	6836588	AT4G11211_	.	+	27.03	17.54
chr4	6837774	6837857	AT4G11216_	.	-	15.72	10.2
chr2	804174	807208	AT2G02820_AtMYB88,MYB88	.	-	21.48	13.94
chr4	12551717	12555909	AT4G24190_AtHsp90-7,AtHsp90.7,HSP90.7,SHD	.	-	45.82	29.75
chr3	8575167	8581112	AT3G23790_AAE16	.	+	43.95	28.54
chr5	21121483	21122985	AT5G52010_	.	-	89.75	58.29
chr5	2818117	2821176	AT5G08670_	.	-	99.06	64.34
chr5	19136023	19137942	AT5G47120_ATBI-1,ATBI1,BI-1,BI1	.	+	75.78	49.22
chr5	17169283	17171704	AT5G42820_ATU2AF35B,U2AF35B	.	-	57.9	37.61
chr3	23120423	23122222	AT3G62500_	.	+	29.79	19.35
chr1	2227594	2229319	AT1G07260_UGT71C3	.	-	34.33	22.3
chr3	16263200	16264261	AT3G44716_	.	+	24.14	15.68
chr2	12037677	12039046	AT2G28230_	.	-	58.52	38.02
chr4	16441179	16445005	AT4G34390_XLG2	.	+	47.76	31.03
chr5	24752850	24756718	AT5G61560_	.	+	25.44	16.53
chr5	14840143	14842070	AT5G37420_	.	+	26.24	17.05
chr3	22973004	22975378	AT3G62030_CYP20-3,ROC4	.	+	50.06	32.54
chr1	7244939	7248143	AT1G20840_AtTMT1,TMT1	.	-	35.23	22.9
chr3	4572180	4574490	AT3G13880_	.	+	41.18	26.78
chr1	23056653	23058114	AT1G62350_	.	+	30.77	20.01
chr1	455688	458164	AT1G02305_	.	+	59.92	38.98
chr1	25188274	25190694	AT1G67280_	.	-	73.55	47.85
chr4	620759	622945	AT4G01460_	.	+	26.64	17.33
chr5	26221932	26225903	AT5G65620_OOP,TOP1	.	+	63.11	41.06
chr1	28518033	28519874	AT1G75960_	.	+	34.8	22.64
chr1	28778890	28780483	AT1G76690_ATOPR2,OPR2	.	+	24.38	15.86
chr1	3118203	3119708	AT1G09630_ATRAB-A2A,ATRAB11C,ATRABA2A,RAB-A2A,RAB11c	.	-	60.45	39.33
chr1	19685183	19685219	AT1G52860_	.	-	6.26	4.07
chr5	20551437	20552566	AT5G50460_	.	-	70.88	46.12
chr3	2839000	2840614	AT3G09250_	.	+	52.82	34.37
chr1	1769014	1771115	AT1G05860_	.	+	92.15	59.97
chr1	19199419	19201642	AT1G51760_IAR3,JR3	.	+	61.51	40.03
chr1	25474140	25477423	AT1G67930_	.	-	64.52	41.99
chr5	18563568	18564921	AT5G45770_AtRLP55,RLP55	.	+	30.58	19.9
chr5	2360634	2362013	AT5G07460_ATMSRA2,PMSR2	.	-	31.67	20.61
chr3	21908913	21910722	AT3G59280_TXR1	.	-	89.39	58.18
chr4	15516784	15519855	AT4G32120_	.	-	55.31	36
chr4	17852441	17854500	AT4G37980_ATCAD7,CAD7,ELI3,ELI3-1	.	+	31.22	20.32
chr4	14138359	14140958	AT4G28630_ABCB23,ATATM1,ATM1	.	-	50.99	33.19
chr2	9952867	9955091	AT2G23370_	.	-	49.73	32.37
chr2	15736764	15737368	AT2G37470_	.	+	46.38	30.19
chr5	6922480	6925887	AT5G20480_EFR	.	+	27.87	18.14
chr5	22681305	22684129	AT5G56010_AtHsp90-3,AtHsp90.3,HSP81-3,Hsp81.3	.	+	41.31	26.89
chr2	11457008	11459365	AT2G26870_NPC2	.	-	29.71	19.34
chr2	13748441	13751933	AT2G32390_ATGLR3.5,GLR3.5,GLR6	.	-	20.54	13.37
chr5	4296688	4299223	AT5G13400_	.	-	26.45	17.22
chr4	9472763	9474803	AT4G16835_	.	+	26.54	17.28
chr1	2309564	2311805	AT1G07520_	.	-	45.24	29.46
chr4	11600005	11601577	AT4G21860_MSRB2	.	-	75.78	49.36
chr4	11097242	11098024	AT4G20690_	.	-	14.94	9.73
chr1	27669152	27673572	AT1G73600_	.	+	40.71	26.52
chr1	9178378	9181835	AT1G26560_BGLU40	.	+	21.98	14.32
chr1	6369347	6373025	AT1G18500_IPMS1,MAML-4	.	+	61.31	39.96
chr2	16851595	16852068	AT2G40350_	.	-	24.38	15.89
chr2	11350719	11351293	AT2G26692_	.	+	13.09	8.53
chr2	7546480	7548313	AT2G17360_	.	+	80.23	52.3
chr1	27361154	27361919	AT1G72690_	.	+	25.68	16.74
chr1	7143067	7146540	AT1G20620_ATCAT3,CAT3,SEN2	.	+	40.51	26.41
chr5	6673933	6676859	AT5G19740_	.	+	45.08	29.39
chr3	6324633	6325793	AT3G18420_	.	-	101.39	66.11
chr5	2631516	2633850	AT5G08180_	.	-	70.87	46.21
chr4	1035681	1037615	AT4G02340_	.	+	74.84	48.8
chr3	15479819	15480028	AT3G43574_	.	-	13.79	8.99
chr4	17812736	17815095	AT4G37890_EDA40	.	-	39.09	25.49
chr3	17535759	17537530	AT3G47590_	.	-	54.07	35.26
chr3	8443445	8448070	AT3G23540_	.	+	63.33	41.3
chr2	16660596	16663048	AT2G39910_	.	+	52.73	34.39
chr5	16410782	16412063	AT5G40950_RPL27	.	+	96.7	63.07
chr2	19457485	19458881	AT2G47420_DIM1A	.	+	79.68	51.97
chr3	10911157	10913190	AT3G28910_ATMYB30,MYB30	.	+	21.19	13.82
chr1	3172108	3173463	AT1G09794_	.	+	51.69	33.72
chr1	23489840	23491519	AT1G63330_	.	+	1.63	1.06
chr3	21488516	21491488	AT3G58040_SINAT2	.	+	67.36	43.95
chr4	6901682	6904244	AT4G11350_	.	+	25.35	16.54
chr2	8073200	8074982	AT2G18600_	.	-	25.21	16.45
chr1	9033218	9038577	AT1G26130_	.	+	26.45	17.26
chr5	16414848	16415220	AT5G40980_	.	-	59.16	38.61
chr3	18514343	18515475	AT3G49940_LBD38	.	+	34.98	22.83
chr2	15764728	15765553	AT2G37580_	.	+	41.67	27.2
chr3	21921746	21924415	AT3G59310_	.	-	33.26	21.71
chr1	9534532	9537561	AT1G27460_NPGR1	.	+	26.38	17.22
chr2	8426206	8429736	AT2G19450_ABX45,AS11,ATDGAT,AtDGAT1,DGAT1,RDS1,TAG1	.	+	40.27	26.29
chr5	25463437	25465897	AT5G63610_ATCDK8,CDKE1,CDKE;1,HEN3	.	-	56.81	37.09
chr1	23657506	23664677	AT1G63770_	.	-	44.74	29.21
chr3	6942769	6945224	AT3G19950_	.	+	101.55	66.31
chr1	7261481	7261681	AT1G20875_	.	+	23.74	15.5
chr5	1875789	1876782	AT5G06190_	.	-	23.6	15.41
chr4	17944556	17945491	AT4G38300_	.	-	88.38	57.72
chr1	23179477	23181519	AT1G62600_	.	+	67.08	43.81
chr3	6119767	6123019	AT3G17860_JAI3,JAZ3,TIFY6B	.	+	29.98	19.58
chr1	11844877	11846347	AT1G32740_	.	+	30.68	20.04
chr1	28746888	28747845	AT1G76600_	.	+	31.49	20.57
chr5	16404457	16406002	AT5G40930_TOM20-4	.	+	63	41.16
chr4	819957	820379	AT4G01895_	.	+	31.94	20.87
chr5	23482187	23483165	AT5G58005_	.	+	83.64	54.66
chr1	24763957	24765541	AT1G66390_ATMYB90,MYB90,PAP2	.	+	22.54	14.73
chr2	12489627	12493285	AT2G29080_ftsh3	.	-	56.9	37.19
chr5	6095343	6095715	AT5G18403_	.	+	8.71	5.69
chr4	10696266	10698243	AT4G19660_ATNPR4,NPR4	.	-	73.25	47.88
chr3	5039931	5045403	AT3G14980_IDM1,ROS4	.	-	52.26	34.16
chr5	17181707	17182623	AT5G42850_	.	-	89.63	58.59
chr5	9433619	9437105	AT5G26820_ATIREG3,IREG3,IREG3,MAR1,RTS3	.	+	60.73	39.7
chr4	15273471	15275310	AT4G31500_ATR4,CYP83B1,RED1,RNT1,SUR2	.	-	33.13	21.66
chr2	17173413	17176807	AT2G41210_PIP5K5	.	+	24.67	16.13
chr1	2111148	2111218	AT1G06880_	.	-	12.94	8.46
chr3	18630032	18630478	AT3G50250_	.	-	1.58	1.03
chr3	7775329	7776109	AT3G22070_	.	-	41.62	27.22
chr3	18272425	18275341	AT3G49290_ABIL2	.	+	32.34	21.15
chr1	21263420	21266368	AT1G56720_	.	-	21.21	13.87
chr1	7865481	7866139	AT1G22270_	.	+	133.51	87.33
chr4	6837911	6839795	AT4G11220_BTI2,RTNLB2	.	-	80.82	52.87
chr1	7754321	7757383	AT1G22020_SHM6	.	+	79.71	52.15
chr1	26563924	26565810	AT1G70490_ARFA1D,ATARFA1D	.	-	68.75	44.98
chr4	11477988	11479953	AT4G21585_ENDO4	.	+	35.78	23.41
chr1	29416913	29418640	AT1G78180_	.	+	73.4	48.03
chr4	11810005	11811214	AT4G22370_	.	-	33.33	21.81
chr3	1658216	1660368	AT3G05675_	.	-	48.24	31.57
chr5	6695224	6701311	AT5G19820_emb2734	.	-	82.88	54.25
chr4	14753349	14760189	AT4G30160_ATVLN4,VLN4	.	+	45.07	29.5
chr5	3243956	3246721	AT5G10320_	.	-	33.39	21.86
chr1	23603935	23607275	AT1G63660_	.	-	53.3	34.9
chr4	16746599	16748266	AT4G35190_LOG5	.	+	18.94	12.4
chr3	363881	365275	AT3G02080_	.	-	80.09	52.45
chr4	10625659	10631570	AT4G19500_	.	+	43.46	28.46
chr5	965874	967322	AT5G03700_	.	-	20.57	13.47
chr5	25374413	25379297	AT5G63320_NPX1	.	-	48.93	32.05
chr1	16425412	16430200	AT1G43620_TT15,UGT80B1	.	-	45.59	29.87
chr1	23607422	23610653	AT1G63670_TRM12	.	-	33.47	21.93
chr5	24113462	24114449	AT5G59860_	.	+	35.91	23.53
chr2	8529916	8530187	AT2G19796_	.	-	17.72	11.61
chr1	27703944	27707518	AT1G73680_ALPHA,alpha-DOX2	.	-	24.03	15.75
chr3	21399766	21402899	AT3G57780_	.	-	21.74	14.25
chr3	21918455	21922706	AT3G59300_	.	+	45.93	30.11
chr1	18455064	18456544	AT1G49850_	.	-	92.02	60.33
chr3	9823685	9827438	AT3G26730_	.	+	68.7	45.05
chr5	18388291	18390420	AT5G45370_UMAMIT1	.	+	41.52	27.23
chr2	10244886	10246919	AT2G24100_ASG1	.	+	60.01	39.36
chr3	19075576	19078120	AT3G51390_AtPAT10,PAT10	.	+	55.34	36.3
chr4	13300795	13304347	AT4G26270_PFK3	.	-	22.67	14.87
chr1	5414817	5421033	AT1G15750_TPL,WSIP1	.	-	54.31	35.63
chr3	7055353	7056758	AT3G20230_	.	-	71.14	46.68
chr3	4227740	4229651	AT3G13150_	.	-	59.83	39.26
chr1	30372879	30375696	AT1G80830_ATNRAMP1,NRAMP1,PMIT1	.	-	30.51	20.02
chr5	19156731	19157978	AT5G47160_	.	+	28.33	18.59
chr5	22182978	22184567	AT5G54600_RPL24,SVR8	.	+	79.85	52.41
chr1	19645268	19646482	AT1G52740_HTA9	.	+	80.58	52.89
chr3	5267351	5270118	AT3G15550_	.	+	20.6	13.52
chr5	19214445	19215878	AT5G47360_	.	-	60.89	39.97
chr2	12431341	12433595	AT2G28950_ATEXP6,ATEXPA6,ATHEXP,EXPA6	.	-	20.14	13.22
chr3	19898788	19900065	AT3G53690_	.	-	40.76	26.76
chr1	10625029	10627105	AT1G30200_	.	+	105.95	69.57
chr5	2542246	2543459	AT5G07960_	.	+	72.08	47.33
chr1	19902495	19903700	AT1G53345_	.	+	62.27	40.89
chr1	1018570	1022108	AT1G03980_ATPCS2,PCS2	.	-	31.69	20.81
chr3	6898181	6901255	AT3G19850_	.	-	25.05	16.45
chr4	16796256	16799777	AT4G35300_TMT2	.	-	45.86	30.12
chr1	29502582	29503241	AT1G78410_	.	+	22.55	14.81
chr1	28940147	28942623	AT1G77000_ATSKP2;2,SKP2B	.	+	44.96	29.54
chr4	685746	686827	AT4G01580_	.	+	34.52	22.68
chr2	1794035	1795084	AT2G05050_	.	+	0.69	0.45
chr3	6499415	6501359	AT3G18850_LPAT5	.	-	28.81	18.93
chr5	8172316	8175431	AT5G24150_SQE5,SQP1	.	-	23.71	15.58
chr4	17292229	17293822	AT4G36680_	.	-	54.21	35.63
chr4	12229026	12231658	AT4G23430_AtTic32-IVa,Tic32-IVa	.	+	27.86	18.31
chr3	16891639	16891712	AT3G45955_	.	+	13.83	9.09
chr2	10801278	10803722	AT2G25355_	.	+	43.38	28.52
chr1	24637196	24638608	AT1G66160_ATCMPG1,CMPG1	.	+	25.66	16.87
chr5	22858509	22860062	AT5G56450_PM-ANT	.	-	69.44	45.66
chr1	24861876	24863368	AT1G66660_	.	-	64.48	42.4
chr5	5394608	5397455	AT5G16520_	.	-	65.75	43.24
chr2	7074362	7079519	AT2G16365_	.	+	25	16.44
chr2	12543812	12548563	AT2G29190_APUM2,PUM2	.	-	55.7	36.64
chr3	8876027	8878171	AT3G24440_VIL1,VRN5	.	-	85.67	56.36
chr2	10182251	10183240	AT2G23930_SNRNP-G	.	+	92.03	60.56
chr5	6352771	6354828	AT5G19020_MEF18	.	-	29.15	19.18
chr5	25143595	25146459	AT5G62630_HIPL2	.	-	33.18	21.84
chr5	24657148	24661021	AT5G61330_	.	-	42.84	28.2
chr1	4182132	4182299	AT1G12294_MIR472A	.	-	135.5	89.21
chr3	3931555	3933356	AT3G12350_	.	+	102.97	67.8
chr1	29349679	29352924	AT1G78060_	.	-	42.92	28.26
chr3	17192589	17194397	AT3G46670_UGT76E11	.	-	49.1	32.33
chr3	22151195	22154483	AT3G59970_MTHFR1	.	+	70.54	46.45
chr1	3780429	3786990	AT1G11270_	.	-	8.72	5.74
chr4	1204303	1205866	AT4G02720_	.	-	126.43	83.27
chr3	19706894	19711439	AT3G53180_NodGS	.	+	37.14	24.46
chr3	20254725	20257848	AT3G54720_AMP1,AtAMP1,COP2,HPT,MFO1,PT	.	-	45.61	30.04
chr5	4932820	4933577	AT5G15190_	.	-	27.74	18.27
chr5	2834743	2838090	AT5G08710_RUG1	.	-	41.22	27.15
chr2	11167257	11168473	AT2G26240_	.	-	79.94	52.66
chr5	8749727	8751636	AT5G25250_FLOT1	.	+	27.31	17.99
chr5	19738716	19739841	AT5G48670_AGL80,FEM111	.	-	32.77	21.59
chr2	8349048	8352562	AT2G19240_	.	-	23.45	15.45
chr4	6015562	6016575	AT4G09490_	.	-	33.19	21.87
chr3	9895542	9898006	AT3G26850_	.	-	49.47	32.6
chr5	3396475	3398063	AT5G10745_	.	+	82.44	54.33
chr4	14689129	14692480	AT4G30060_	.	-	38.27	25.22
chr5	16888226	16891192	AT5G42240_scpl42	.	+	41.38	27.27
chr4	17176342	17181261	AT4G36360_BGAL3	.	-	36.63	24.14
chr4	9604502	9604974	AT4G17085_	.	+	47.84	31.53
chr1	2313582	2316469	AT1G07530_ATGRAS2,GRAS2,SCL14	.	-	63.49	41.85
chr1	9429047	9432274	AT1G27150_	.	+	46.97	30.96
chr5	503408	507244	AT5G02370_	.	+	32.22	21.24
chr5	9423092	9423611	AT5G26790_	.	+	32.08	21.15
chr1	7966533	7968641	AT1G22550_	.	-	25.24	16.64
chr2	1704283	1705778	AT2G04850_	.	+	40.45	26.67
chr1	19608731	19610452	AT1G52640_	.	-	49.23	32.46
chr5	2875232	2876575	AT5G09250_KIWI	.	-	61.1	40.29
chr5	6144963	6146570	AT5G18520_Cand7	.	+	124.04	81.8
chr5	21167243	21167350	AT5G52080_	.	+	5.57	3.67
chr5	16667885	16669489	AT5G41680_	.	+	58.7	38.71
chr2	18441989	18443399	AT2G44740_CYCP4;1	.	-	24.28	16.01
chr4	7482466	7484405	AT4G12700_	.	-	35.15	23.18
chr1	25596671	25598438	AT1G68290_ENDO2	.	+	41.76	27.54
chr1	28857250	28858407	AT1G76870_	.	+	51.19	33.76
chr2	3311654	3312651	AT2G07687_	.	-	0.46	0.3
chr4	15255623	15258812	AT4G31450_	.	-	50.28	33.16
chr5	2453135	2455546	AT5G07710_	.	+	48.02	31.67
chr4	9488466	9495816	AT4G16860_RPP4	.	-	19.41	12.8
chr1	30044746	30046027	AT1G79870_	.	+	99.02	65.32
chr4	17165331	17169375	AT4G36280_CRH1,MORC2	.	-	24.88	16.41
chr1	20566030	20569286	AT1G55120_AtcwINV3,ATFRUCT5,FRUCT5	.	+	24.06	15.87
chr5	25417265	25418635	AT5G63480_	.	+	66	43.54
chr2	18382070	18383513	AT2G44525_	.	+	49.87	32.9
chr3	6978477	6980368	AT3G20015_	.	-	40.56	26.76
chr1	17031281	17033198	AT1G45050_ATUBC2-1,UBC15	.	+	57.29	37.8
chr5	26836148	26837811	AT5G67260_CYCD3;2	.	+	68.14	44.96
chr5	16433317	16434318	AT5G41050_	.	-	28.95	19.1
chr5	7616073	7619981	AT5G22800_EMB1030,EMB263,EMB86	.	-	38.25	25.24
chr5	23313436	23314415	AT5G57570_	.	-	44.18	29.16
chr2	12972877	12975497	AT2G30440_Plsp2B,TPP	.	+	95.41	62.98
chr3	2823090	2825114	AT3G09200_	.	-	101.15	66.78
chr1	5756835	5758464	AT1G16820_	.	-	28.54	18.84
chr5	8997183	9000329	AT5G25820_	.	-	23.1	15.25
chr5	2783331	2786094	AT5G08590_ASK2,ASK2,SNRK2-1,SNRK2.1,SRK2G	.	+	64.73	42.74
chr4	1490465	1495103	AT4G03390_SRF3	.	-	42.27	27.91
chr3	19534585	19536018	AT3G52710_	.	+	22.02	14.54
chr3	10129610	10132760	AT3G27380_SDH2-1	.	-	70.61	46.65
chr1	20065714	20068466	AT1G53750_RPT1A	.	-	71.01	46.92
chr2	15592552	15594014	AT2G37110_	.	+	87.49	57.81
chr5	922166	924683	AT5G03630_ATMDAR2	.	-	49.92	32.99
chr4	7115736	7121245	AT4G11830_PLDGAMMA2	.	-	40.31	26.64
chr3	16945364	16946461	AT3G46130_ATMYB48,ATMYB48-1,ATMYB48-2,ATMYB48-3,MYB48	.	+	25.8	17.05
chr2	11221516	11223213	AT2G26360_	.	-	28.16	18.61
chr2	9270663	9270734	AT2G21700_	.	-	30.02	19.84
chr4	11488976	11490398	AT4G21610_LOL2	.	+	37.7	24.92
chr4	13813044	13813516	AT4G27657_	.	+	28.47	18.82
chr5	3638431	3639883	AT5G11410_	.	-	16.96	11.21
chr3	4667365	4669194	AT3G14080_LSM1B	.	+	58.35	38.58
chr5	9076107	9077379	AT5G25990_	.	-	26.44	17.48
chr1	3275891	3278697	AT1G10040_	.	-	25.72	17.01
chr4	13136107	13137859	AT4G25835_	.	+	40.29	26.65
chr3	1255526	1256869	AT3G04620_DAN1	.	-	29.92	19.79
chr1	408622	410611	AT1G02150_	.	+	78.36	51.85
chr2	15355648	15355764	AT2G36632_	.	+	6.82	4.51
chr3	20189805	20192792	AT3G54540_ABCF4,ATGCN4,GCN4	.	+	67.26	44.51
chr3	1518882	1521494	AT3G05330_ATN,ATTAN	.	-	18.8	12.44
chr3	16841277	16845541	AT3G45830_	.	+	31.88	21.1
chr3	1673780	1674908	AT3G05685_	.	-	28.36	18.77
chr1	3190288	3192414	AT1G09820_	.	-	51	33.76
chr4	9449114	9450743	AT4G16780_ATHB-2,ATHB2,HAT4,HB-2	.	+	25.35	16.78
chr3	21797058	21798303	AT3G58990_IPMI1	.	-	41.33	27.36
chr4	17872740	17872853	AT4G38052_	.	-	17.66	11.69
chr1	1435254	1437667	AT1G05020_	.	-	23.61	15.63
chr1	27779166	27780676	AT1G73870_BBX16,COL7	.	+	42.41	28.08
chr5	13897940	13898387	AT5G35732_	.	+	46.15	30.57
chr1	1356191	1358386	AT1G04820_TOR2,TUA4	.	-	50.96	33.76
chr1	272111	274569	AT1G01740_BSK4	.	-	52.94	35.08
chr4	9289685	9289765	AT4G16475_	.	+	22.05	14.61
chr3	7963537	7965907	AT3G22460_OASA2	.	+	28.84	19.11
chr3	2313998	2317188	AT3G07270_	.	+	47.35	31.38
chr3	21384676	21387399	AT3G57710_	.	-	50.65	33.57
chr1	6602126	6605908	AT1G19110_	.	+	56.81	37.66
chr1	14293064	14296191	AT1G38131_	.	-	20.79	13.78
chr5	4474976	4477045	AT5G13870_EXGT-A4,XTH5	.	-	38.27	25.37
chr4	6864097	6866116	AT4G11280_ACS6,ATACS6	.	+	34.77	23.05
chr5	20993537	20995644	AT5G51670_	.	+	29.46	19.53
chr4	1428171	1431663	AT4G03260_	.	+	64.49	42.76
chr2	17285723	17288928	AT2G41460_ARP	.	+	37.49	24.86
chr4	12251431	12254270	AT4G23490_	.	-	65.5	43.44
chr2	16567209	16568822	AT2G39720_RHC2A	.	-	145.95	96.8
chr3	2940446	2942109	AT3G09570_	.	+	83.33	55.27
chr4	14491625	14494001	AT4G29510_ATPRMT11,ATPRMT1B,PRMT11,PRMT1B	.	+	60.62	40.21
chr4	14607078	14608379	AT4G29880_PIRL7	.	-	42.45	28.16
chr3	23315506	23316258	AT3G63095_	.	+	39.42	26.15
chr3	19766664	19768599	AT3G53310_	.	-	28.2	18.71
chr4	18135800	18139206	AT4G38890_	.	-	55.38	36.75
chr5	5078200	5079091	AT5G15600_SP1L4	.	+	35.38	23.48
chr1	6584454	6584705	AT1G19070_	.	+	132.47	87.93
chr1	5257046	5264942	AT1G15290_	.	-	50.29	33.38
chr1	24286826	24289249	AT1G65380_AtRLP10,CLV2	.	+	45.34	30.1
chr2	8877960	8880388	AT2G20610_ALF1,HLS3,RTY,RTY1,SUR1	.	-	62.04	41.19
chr1	9381803	9383984	AT1G27030_	.	+	21.18	14.06
chr5	16369114	16369350	AT5G40855_	.	-	17.46	11.59
chr4	11505961	11509842	AT4G21660_	.	-	64.41	42.77
chr1	461828	461974	AT1G02320_	.	+	21.99	14.6
chr2	9393670	9393743	AT2G22110_	.	+	20.92	13.89
chr3	6477699	6479548	AT3G18790_	.	+	88.18	58.56
chr3	6611198	6614044	AT3G19130_ATRBP47B,RBP47B	.	-	80.41	53.4
chr5	21876861	21880461	AT5G53890_AtPSKR2,PSKR2	.	+	40.93	27.18
chr3	10159293	10162259	AT3G27460_AtSGF29a,SGF29a	.	-	42.02	27.91
chr1	5647549	5647813	AT1G16515_	.	-	29.96	19.9
chr1	8863777	8866805	AT1G25280_AtTLP10,TLP10	.	+	57.34	38.09
chr3	20262391	20264601	AT3G54740_	.	+	33.12	22
chr5	25191842	25195009	AT5G62720_	.	+	21.92	14.56
chr5	22561941	22564433	AT5G55740_CRR21	.	-	53.24	35.37
chr1	172146	172948	AT1G01470_LEA14,LSR3	.	-	23.74	15.77
chr5	9398015	9399267	AT5G26749_	.	-	31.17	20.71
chr4	15640620	15646665	AT4G32410_ANY1,AtCESA1,CESA1,RSW1	.	-	61.49	40.86
chr1	12157156	12158953	AT1G33520_MOS2	.	-	106.22	70.59
chr1	29404648	29406752	AT1G78150_	.	+	68.43	45.48
chr2	16061954	16062060	AT2G38325_MIR390,MIR390A	.	+	17.08	11.35
chr5	19123506	19123779	AT5G47077_LCR6	.	-	26.42	17.56
chr4	17978443	17979740	AT4G38400_ATEXLA2,ATEXPL2,ATHEXP,EXLA2,EXPL2	.	-	19.47	12.94
chr1	11672931	11675339	AT1G32360_	.	+	77.34	51.42
chr5	1719557	1722910	AT5G05730_AMT1,ASA1,JDL1,TRP5,WEI2	.	-	39.3	26.13
chr1	27093028	27094027	AT1G71970_	.	+	29.63	19.7
chr1	10494707	10496170	AT1G29960_	.	+	63.25	42.06
chr1	20380478	20385125	AT1G54570_PES1	.	-	30.77	20.46
chr1	865915	867733	AT1G03470_NET3A	.	-	39.32	26.15
chr1	28729132	28730825	AT1G76570_AtLHCB7,LHCB7	.	+	78.66	52.32
chr1	8125023	8127196	AT1G22950_	.	-	53.83	35.81
chr4	14677285	14681956	AT4G30020_	.	+	35.85	23.85
chr5	14620732	14622941	AT5G37010_	.	-	30.28	20.15
chr3	18549268	18551041	AT3G50040_	.	-	34.35	22.86
chr2	13177179	13178328	AT2G30960_	.	-	50.35	33.51
chr1	787122	788651	AT1G03220_	.	+	56.43	37.56
chr1	5619471	5619543	AT1G16450_	.	-	28.08	18.69
chr3	2742970	2744932	AT3G08990_	.	+	24.91	16.58
chr5	8217335	8219619	AT5G24210_	.	+	23.87	15.89
chr1	14174981	14177992	AT1G37150_HCS2	.	-	20.1	13.38
chr4	5962181	5963791	AT4G09420_	.	-	21.84	14.54
chr1	10135451	10136241	AT1G29041_	.	+	35.61	23.71
chr1	17013400	17015497	AT1G45010_	.	-	23.67	15.76
chr2	12199098	12200765	AT2G28510_	.	-	25.47	16.96
chr5	23374874	23377142	AT5G57700_	.	+	37.69	25.1
chr3	7399151	7402436	AT3G21100_	.	+	44.05	29.35
chr3	18918019	18918618	AT3G50900_	.	+	24.93	16.61
chr5	20123823	20126813	AT5G49580_	.	-	50.84	33.88
chr1	7680481	7682641	AT1G21880_LYM1,LYP2	.	+	52.04	34.68
chr4	14493911	14495745	AT4G29520_	.	-	47.07	31.37
chr5	9535059	9538333	AT5G27100_ATGLR2.1,GLR2.1	.	-	25.31	16.87
chr1	20511519	20513681	AT1G54990_AXR4,RGR,RGR1	.	+	67.6	45.07
chr5	2271919	2274288	AT5G07240_IQD24	.	+	27.91	18.61
chr3	7582740	7584583	AT3G21530_	.	-	29.75	19.84
chr1	27959578	27961454	AT1G74380_XXT5	.	+	94.02	62.71
chr5	41768	44375	AT5G01110_	.	-	45.25	30.18
chr5	7172687	7177841	AT5G21105_	.	+	24.47	16.32
chr4	7621346	7623360	AT4G13070_	.	-	52.95	35.32
chr5	23552094	23554402	AT5G58210_	.	+	39.29	26.21
chr4	10988037	10989890	AT4G20350_	.	+	31.84	21.24
chr5	707257	708396	AT5G03020_	.	+	44.19	29.48
chr2	7935285	7936721	AT2G18240_	.	+	78.66	52.48
chr2	7674351	7676157	AT2G17670_	.	+	84.67	56.5
chr3	17656670	17658316	AT3G47860_CHL	.	-	36.32	24.24
chr3	3023211	3025851	AT3G09850_	.	-	76.08	50.78
chr5	6984240	6985365	AT5G20640_	.	+	42.73	28.52
chr1	18400092	18402628	AT1G49720_ABF1,AtABF1	.	+	38.28	25.55
chr3	18297406	18300189	AT3G49350_	.	-	55.07	36.76
chr5	7541271	7545182	AT5G22690_	.	+	32.93	21.98
chr3	18097048	18099721	AT3G48810_	.	+	28.78	19.21
chr1	19492255	19492769	AT1G52342_	.	-	38.89	25.96
chr4	11340362	11341877	AT4G21320_HSA32	.	+	27.76	18.53
chr1	27611363	27612815	AT1G73440_	.	+	82.46	55.05
chr5	5867283	5869050	AT5G17780_	.	-	30.71	20.5
chr1	9086853	9089378	AT1G26260_CIB5	.	+	19.98	13.34
chr2	12484843	12486983	AT2G29065_	.	+	42.11	28.12
chr5	6881619	6884630	AT5G20360_Phox3	.	-	56.85	37.97
chr4	16694170	16695698	AT4G35070_	.	+	26.35	17.6
chr2	11551041	11554775	AT2G27060_	.	+	38.04	25.41
chr1	10581735	10584080	AT1G30110_ATNUDX25,NUDX25	.	+	22.62	15.11
chr3	8087307	8088747	AT3G22845_	.	+	102.01	68.16
chr1	22767663	22768501	AT1G61667_	.	+	21.33	14.25
chr1	2588525	2588596	AT1G08240_	.	+	18.89	12.62
chr1	8685271	8688247	AT1G24510_	.	-	79.15	52.89
chr1	3325824	3327614	AT1G10150_	.	+	95.3	63.69
chr1	11198353	11200141	AT1G31310_	.	-	29.69	19.84
chr5	15785717	15787946	AT5G39450_	.	+	49.57	33.13
chr1	27409237	27413851	AT1G72840_	.	-	24.39	16.3
chr3	2418049	2420296	AT3G07570_	.	-	28.04	18.74
chr2	16504846	16506008	AT2G39560_	.	-	42.88	28.66
chr5	1974659	1975378	AT5G06470_	.	-	20.72	13.85
chr2	14047478	14051140	AT2G33150_KAT2,PED1,PKT3	.	-	56.79	37.97
chr2	7498130	7499206	AT2G17240_	.	+	84.56	56.54
chr5	16264861	16267354	AT5G40610_GPDHp	.	-	54.41	36.38
chr4	17954710	17957828	AT4G38340_NLP3	.	+	27.73	18.54
chr1	21192499	21195112	AT1G56560_A/N-InvA	.	+	57.44	38.41
chr1	11464985	11469185	AT1G31930_XLG3	.	+	42.56	28.46
chr3	7563503	7565074	AT3G21470_	.	+	21.58	14.43
chr3	16326040	16326162	AT3G44783_	.	+	19.65	13.14
chr2	9003135	9005938	AT2G20950_	.	+	53.93	36.07
chr3	11005779	11006414	AT3G29000_	.	+	23.07	15.43
chr1	19154323	19155947	AT1G51660_ATMEK4,ATMKK4,MKK4	.	+	101.14	67.66
chr5	5275695	5276606	AT5G16160_	.	-	22.65	15.15
chr5	11611983	11614530	AT5G30490_	.	+	64.34	43.05
chr3	10338212	10339436	AT3G27880_	.	+	29.4	19.67
chr2	15224497	15226872	AT2G36310_NSH1,URH1	.	-	48.15	32.22
chr3	4172142	4175248	AT3G13040_	.	-	76.59	51.26
chr3	10210431	10213004	AT3G27560_ATN1	.	-	53.26	35.65
chr1	20800694	20802340	AT1G55660_	.	+	22.56	15.1
chr5	26710555	26712971	AT5G66880_SNRK2-3,SNRK2.3,SRK2I	.	+	61.5	41.17
chr5	19774170	19776460	AT5G48775_	.	+	18.84	12.61
chr5	9480573	9482790	AT5G26940_DPD1	.	+	50.58	33.86
chr2	15286498	15288990	AT2G36420_TRM27	.	+	27.41	18.35
chr4	16155503	16159578	AT4G33630_EX1	.	+	73.18	49
chr1	28484163	28485951	AT1G75860_	.	-	74.18	49.67
chr2	10225225	10228638	AT2G24050_eIFiso4G2	.	-	47.97	32.12
chr1	23304313	23306374	AT1G62920_	.	+	16.55	11.08
chr1	28695760	28698793	AT1G76490_AtHMGR1,HMG1,HMGR1,MAD3	.	+	83.14	55.69
chr2	18814709	18818463	AT2G45670_	.	-	79.91	53.53
chr4	17455139	17457357	AT4G37040_MAP1D	.	+	50.83	34.05
chr2	9636380	9638745	AT2G22670_IAA8	.	+	49.8	33.36
chr4	11943849	11945956	AT4G22740_	.	-	56.68	37.97
chr2	17807942	17809590	AT2G42800_AtRLP29,RLP29	.	-	23.75	15.91
chr4	6132837	6135200	AT4G09720_ATRABG3A,RABG3A	.	+	70.24	47.06
chr2	18157638	18159231	AT2G43840_UGT74F1	.	+	24.24	16.24
chr3	11252807	11257814	AT3G29320_PHS1	.	+	48.29	32.36
chr2	9263537	9264098	AT2G21655_	.	+	21.46	14.38
chr1	22294384	22297220	AT1G60505_	.	-	73.71	49.4
chr5	23429291	23430996	AT5G57830_	.	-	27.95	18.73
chr4	12102135	12107460	AT4G23100_ATECS1,AtGSH1,CAD2,GSH1,GSHA,PAD2,RML1	.	-	48.79	32.7
chr3	18614170	18616452	AT3G50210_	.	-	52.19	34.98
chr5	15853929	15855192	AT5G39600_	.	-	83.14	55.73
chr4	6794776	6795793	AT4G11140_CRF1	.	-	32.64	21.88
chr1	19970664	19974393	AT1G53510_ATMPK18,MPK18	.	-	65.39	43.84
chr1	22908045	22909588	AT1G61980_	.	+	75.71	50.76
chr4	7336497	7337356	AT4G12390_PME1	.	+	35.11	23.54
chr5	15261005	15265630	AT5G38210_	.	+	50.44	33.82
chr3	6305975	6310620	AT3G18370_ATSYTF,NTMC2T3,NTMC2TYPE3,SYTF	.	+	30.74	20.61
chr1	6056895	6058357	AT1G17610_CHS1	.	+	20.45	13.71
chr1	25957819	25960307	AT1G69040_ACR4	.	+	28.58	19.17
chr3	21836579	21838620	AT3G59080_	.	+	49.7	33.34
chr3	2620832	2622220	AT3G08630_	.	+	40.69	27.3
chr2	15906862	15909931	AT2G38010_	.	+	35.98	24.14
chr3	2321740	2324382	AT3G07290_	.	-	34.22	22.96
chr5	9742576	9747005	AT5G27600_ATLACS7,LACS7	.	+	55.87	37.49
chr1	1963380	1965051	AT1G06440_	.	-	30.09	20.19
chr5	19698407	19699947	AT5G48590_	.	+	91.35	61.31
chr3	6511023	6514994	AT3G18890_AtTic62,Tic62	.	+	47.05	31.58
chr4	9601451	9604207	AT4G17080_	.	+	90.01	60.42
chr3	7775329	7776207	AT3G22072_	.	+	37.41	25.11
chr1	5222913	5224121	AT1G15175_	.	-	25.79	17.31
chr5	5810935	5813284	AT5G17640_ASG1	.	-	49.1	32.96
chr3	5147405	5148305	AT3G15300_	.	-	39	26.18
chr2	9085210	9085909	AT2G21210_SAUR6	.	-	30.15	20.24
chr3	5658317	5661963	AT3G16620_ATTOC120,TOC120	.	-	40.53	27.21
chr1	19857351	19859256	AT1G53250_	.	+	39.44	26.48
chr1	29342157	29343824	AT1G78030_	.	+	13.78	9.25
chr2	10718096	10718198	AT2G25171_MIR862A	.	+	114.12	76.63
chr4	9759325	9760340	AT4G17500_ATERF-1,ERF-1	.	+	29.28	19.66
chr1	6142564	6146521	AT1G17840_ABCG11,AtABCG11,ATWBC11,COF1,DSO,WBC11	.	+	27.52	18.48
chr5	885522	887390	AT5G03530_ATRAB,ATRAB,ATRAB18B,ATRABC2A,RABC2A	.	-	32.88	22.08
chr1	22305831	22308229	AT1G60550_DHNS,ECHID	.	-	65.99	44.32
chr2	7510100	7512387	AT2G17270_MPT1,PHT3;3	.	+	50.46	33.89
chr1	16548441	16551909	AT1G43770_	.	+	40.87	27.45
chr1	30305362	30307417	AT1G80620_	.	+	81.06	54.45
chr5	2706458	2708946	AT5G08400_	.	-	29.85	20.05
chr2	17774903	17776320	AT2G42680_ATMBF1A,MBF1A	.	+	65.84	44.23
chr1	1231578	1234032	AT1G04520_PDLP2	.	+	26.17	17.58
chr1	26018438	26020058	AT1G69210_	.	-	23.55	15.82
chr5	21953787	21956564	AT5G54100_	.	-	40.65	27.31
chr4	6696712	6699199	AT4G10920_KELP	.	-	49.25	33.09
chr3	830165	831888	AT3G03490_AtPEX19-1,PEX19-1	.	-	57.91	38.91
chr2	17968698	17970835	AT2G43235_	.	-	65.73	44.17
chr3	5173593	5173781	AT3G15359_	.	+	40.3	27.08
chr4	14450008	14451394	AT4G29350_PFN2,PRF2,PRO2	.	+	93.45	62.8
chr2	14144831	14146471	AT2G33380_AtCLO3,CLO-3,CLO3,RD20	.	-	26.17	17.59
chr1	20927643	20930017	AT1G55960_	.	-	60.49	40.67
chr3	396012	399779	AT3G02170_LNG2,TRM1	.	-	34.21	23
chr2	10013991	10016943	AT2G23520_	.	-	54.23	36.47
chr1	12455708	12457412	AT1G34200_	.	+	75.34	50.67
chr4	8972649	8974690	AT4G15760_MO1	.	-	24.73	16.63
chr3	5556710	5558589	AT3G16370_	.	+	21.83	14.68
chr5	6714264	6715875	AT5G19860_	.	-	87.72	59
chr5	22467430	22468263	AT5G55450_	.	+	15.94	10.72
chr5	17734738	17737859	AT5G44070_ARA8,ATPCS1,CAD1,PCS1	.	+	58.21	39.16
chr5	15643603	15645116	AT5G39090_	.	+	29.49	19.84
chr3	3660377	3663734	AT3G11590_	.	+	61.48	41.37
chr3	6281204	6282306	AT3G18295_	.	+	105.58	71.05
chr5	370400	372969	AT5G01960_	.	+	80.24	54
chr5	4740252	4743446	AT5G14700_	.	-	22.01	14.81
chr1	28951685	28953509	AT1G77060_	.	-	46.3	31.16
chr3	1530735	1533288	AT3G05360_AtRLP30,RLP30	.	-	71.72	48.27
chr1	11907109	11908928	AT1G32860_	.	-	28.56	19.22
chr2	15318028	15320152	AT2G36500_	.	+	33.7	22.68
chr4	8475457	8481094	AT4G14760_NET1B	.	+	34.94	23.52
chr1	16051795	16051935	AT1G42699_	.	+	7.25	4.88
chr1	17276103	17277659	AT1G47056_VFB1	.	-	102.73	69.2
chr5	24251382	24251628	AT5G60240_	.	+	73.74	49.68
chr3	16466290	16468989	AT3G45010_scpl48	.	+	26.75	18.02
chr1	19191523	19194787	AT1G51745_	.	+	47.05	31.7
chr1	5040861	5041733	AT1G14680_	.	+	43.38	29.23
chr5	26339876	26341789	AT5G65820_	.	-	58	39.1
chr1	27650992	27653942	AT1G73570_	.	+	48.95	33
chr2	16980943	16981368	AT2G40710_	.	-	7.79	5.25
chr5	332337	334470	AT5G01850_	.	+	45.47	30.66
chr3	21252419	21255276	AT3G57420_	.	-	51.08	34.45
chr5	23533701	23539465	AT5G58160_	.	+	39.41	26.58
chr2	1181537	1183703	AT2G03880_REME1	.	+	25.96	17.51
chr1	1553603	1557733	AT1G05320_	.	+	16.25	10.96
chr5	19351292	19353444	AT5G47790_	.	+	60.82	41.03
chr1	29842771	29844638	AT1G79340_AtMC4,AtMCP2d,MC4,MCP2d	.	+	81.54	55.01
chr2	18328417	18330336	AT2G44410_	.	+	60.52	40.83
chr2	18226317	18228151	AT2G44060_	.	+	61.2	41.29
chr2	9426849	9427817	AT2G22170_PLAT2	.	-	31.51	21.26
chr5	4674233	4676765	AT5G14500_	.	-	45.11	30.44
chr3	5513273	5516932	AT3G16270_	.	+	69.32	46.78
chr1	3031203	3033582	AT1G09390_	.	+	20.76	14.01
chr5	3297804	3300151	AT5G10480_PAS2,PEP	.	-	51.39	34.69
chr5	16059509	16061043	AT5G40150_	.	-	42.44	28.65
chr4	16301179	16304099	AT4G34030_MCCB	.	+	45.92	31
chr4	14472400	14473621	AT4G29430_rps15ae	.	+	44.57	30.09
chr1	3041996	3045402	AT1G09430_ACLA-3	.	+	46.48	31.38
chr3	13230	14675	AT3G01050_MUB1	.	+	67.83	45.8
chr5	8856997	8858476	AT5G25450_	.	+	23.4	15.8
chr4	898307	900870	AT4G02050_STP7	.	-	24.91	16.82
chr2	9454244	9454399	AT2G22241_	.	+	16.84	11.37
chr3	1189640	1192638	AT3G04470_	.	-	56.37	38.07
chr1	25570231	25571712	AT1G68220_	.	+	57.36	38.74
chr5	5182641	5184878	AT5G15870_	.	-	70.82	47.84
chr3	8134190	8136204	AT3G22942_AGG2,AtGG2	.	+	50.12	33.86
chr1	1313564	1315750	AT1G04690_KAB1,KV-BETA1	.	+	92.61	62.57
chr1	26796966	26800322	AT1G71040_LPR2	.	-	27.74	18.74
chr3	275411	278785	AT3G01770_ATBET10,BET10	.	-	64.13	43.33
chr1	20183581	20187096	AT1G54080_UBP1A	.	-	51.95	35.1
chr3	2903198	2905729	AT3G09440_	.	-	49.73	33.6
chr1	18183266	18184443	AT1G49170_	.	-	74.19	50.13
chr5	2709848	2710583	AT5G08410_FTRA2	.	-	127.83	86.38
chr4	15179132	15180803	AT4G31248_	.	+	75.53	51.04
chr4	15377211	15379025	AT4G31790_	.	+	61.9	41.83
chr3	4408925	4409440	AT3G13520_AGP12,ATAGP12	.	+	26.21	17.71
chr5	16246786	16248390	AT5G40570_	.	+	23.19	15.67
chr1	23803793	23807159	AT1G64140_	.	-	62.44	42.2
chr1	23803793	23807159	AT1G64142_CPuORF23	.	-	62.44	42.2
chr3	4761432	4762395	AT3G14280_	.	-	25.85	17.47
chr2	9238482	9242440	AT2G21590_APL4	.	+	20.33	13.74
chr3	3130072	3130891	AT3G10120_	.	+	26.26	17.75
chr1	10979646	10980688	AT1G30845_	.	+	54.29	36.7
chr5	7599146	7601690	AT5G22790_RER1	.	-	41.95	28.36
chr3	16260205	16262484	AT3G44713_	.	+	22.04	14.9
chr1	1960058	1963011	AT1G06430_FTSH8	.	-	62.59	42.32
chr5	17610972	17616797	AT5G43810_AGO10,PNH,ZLL	.	+	24.79	16.76
chr2	15664800	15667079	AT2G37310_	.	-	48.82	33.01
chr2	3045559	3046744	AT2G07340_PFD1	.	+	48.03	32.48
chr1	19122170	19124688	AT1G51570_	.	-	71.51	48.37
chr2	18041485	18043086	AT2G43445_	.	+	24.81	16.78
chr3	13490945	13493787	AT3G32940_	.	-	47.45	32.1
chr4	16389620	16392824	AT4G34240_ALDH3,ALDH3I1	.	+	46.93	31.75
chr2	15667208	15668851	AT2G37320_	.	+	52.32	35.4
chr5	4535401	4539193	AT5G14060_CARAB-AK-LYS	.	+	52.79	35.72
chr3	18304742	18307906	AT3G49370_	.	-	35.1	23.75
chr4	7129123	7133200	AT4G11850_MEE54,PLDGAMMA1	.	-	41.23	27.9
chr1	26640565	26642149	AT1G70660_MMZ2,UEV1B	.	+	77.68	52.57
chr5	15439249	15443164	AT5G38560_AtPERK8,PERK8	.	+	53.03	35.89
chr3	1917240	1919925	AT3G06330_	.	+	59.13	40.02
chr1	27936508	27940190	AT1G74310_ATHSP101,HOT1,HSP101	.	-	40.42	27.36
chr3	11267091	11269229	AT3G29360_UGD2	.	-	54.91	37.17
chr3	5902479	5902883	AT3G17270_	.	-	20.86	14.12
chr2	18295756	18297567	AT2G44255_	.	-	65.42	44.29
chr3	16617544	16621370	AT3G45290_ATMLO3,MLO3	.	+	22.69	15.36
chr4	10454497	10459328	AT4G19110_	.	-	55.12	37.32
chr2	132697	134455	AT2G01250_	.	-	96.66	65.45
chr1	24729629	24732491	AT1G66330_	.	-	68.47	46.37
chr4	10661428	10664716	AT4G19560_CYCT1;2	.	+	29.12	19.72
chr3	319061	321560	AT3G01930_	.	-	42.88	29.04
chr5	16455188	16459237	AT5G41120_	.	-	27.39	18.55
chr3	9292485	9294347	AT3G25580_	.	+	71.9	48.7
chr1	6807715	6809569	AT1G19690_	.	-	30.74	20.82
chr4	16369357	16371430	AT4G34180_	.	-	65.68	44.49
chr2	15944711	15947085	AT2G38090_	.	+	22.28	15.09
chr1	4739873	4741038	AT1G13830_	.	-	24.33	16.48
chr4	17324571	17326457	AT4G36750_	.	+	81.3	55.08
chr5	7524342	7526160	AT5G22630_ADT5	.	+	29.73	20.14
chr5	10654592	10654741	AT5G28642_	.	-	12.8	8.67
chr4	18152687	18154114	AT4G38940_	.	+	77.32	52.4
chr1	26204805	26206928	AT1G69680_	.	+	59.76	40.5
chr3	19889358	19889774	AT3G53650_	.	+	27.15	18.4
chr1	2155213	2156008	AT1G07020_	.	-	41.96	28.44
chr5	17451669	17453124	AT5G43420_	.	+	30.45	20.64
chr3	6037598	6039319	AT3G17660_AGD15	.	+	26.02	17.64
chr4	8500266	8502240	AT4G14800_PBD2	.	+	60.11	40.76
chr4	10149129	10151218	AT4G18370_DEG5,DEGP5,HHOA	.	+	68.54	46.48
chr5	143055	144720	AT5G01340_AtmSFC1,mSFC1	.	-	63.73	43.22
chr5	4196572	4197848	AT5G13180_ANAC083,NAC083,VNI2	.	+	27.93	18.94
chr4	15676404	15677973	AT4G32480_	.	+	21.53	14.6
chr1	5177529	5180049	AT1G15030_	.	+	72.21	48.98
chr4	8013893	8016486	AT4G13840_CER26	.	-	27.1	18.38
chr2	17858698	17863466	AT2G42920_	.	+	38.99	26.45
chr2	9823965	9826898	AT2G23070_	.	-	76.47	51.88
chr1	27965551	27967926	AT1G74410_	.	+	52.81	35.83
chr1	26161599	26162761	AT1G69572_	.	+	25.53	17.32
chr3	5976949	5977545	AT3G17460_	.	-	67.07	45.51
chr1	6565494	6567525	AT1G19010_	.	+	47.82	32.45
chr4	15237370	15239323	AT4G31400_AtCTF7,CTF7,ECO1	.	+	24.17	16.4
chr1	21181664	21185306	AT1G56540_	.	+	18.57	12.6
chr1	3122956	3124578	AT1G09645_	.	+	65.39	44.38
chr1	4694372	4696023	AT1G13700_PGL1	.	-	25.05	17
chr5	3754249	3758242	AT5G11670_ATNADP-ME2,NADP-ME2	.	+	50.3	34.14
chr1	22397592	22397662	AT1G60840_	.	-	13.69	9.29
chr3	7057011	7058891	AT3G20240_	.	+	52.9	35.91
chr5	26397672	26399274	AT5G66005_	.	-	34.16	23.19
chr5	16760908	16764276	AT5G41880_POLA3,POLA4	.	+	27.19	18.46
chr2	13794426	13797227	AT2G32500_	.	-	39.41	26.76
chr3	242011	245268	AT3G01650_RGLG1	.	+	43.62	29.62
chr3	3442528	3443445	AT3G10985_ATWI-12,SAG20,WI12	.	+	32.03	21.75
chr1	2242256	2244428	AT1G07290_GONST2	.	-	30.16	20.48
chr1	6522764	6525962	AT1G18890_ATCDPK1,AtCPK10,CDPK1,CPK10	.	-	54.63	37.1
chr1	8409963	8412041	AT1G23790_	.	+	19.97	13.56
chr5	24675064	24678550	AT5G61380_APRR1,AtTOC1,PRR1,TOC1	.	+	44.72	30.37
chr1	12244585	12246188	AT1G33780_	.	-	80.38	54.59
chr5	24308322	24312698	AT5G60450_ARF4	.	-	51.87	35.23
chr3	23333513	23334034	AT3G63160_OEP6	.	-	34.32	23.31
chr1	23020515	23020685	AT1G62301_	.	-	6.85	4.65
chr5	5092157	5094494	AT5G15650_ATRGP2,RGP2	.	+	72.56	49.29
chr1	7164190	7168021	AT1G20670_	.	-	35.42	24.06
chr5	26292372	26295440	AT5G65710_HSL2	.	+	40.32	27.39
chr1	30258076	30260679	AT1G80480_PTAC17	.	-	53.86	36.59
chr4	14601621	14603011	AT4G29850_	.	-	26.24	17.83
chr2	19309868	19315241	AT2G47000_ABCB4,AtABCB4,ATPGP4,MDR4,PGP4	.	-	31.77	21.59
chr5	947101	948967	AT5G03668_	.	-	26.12	17.75
chr3	19282601	19284146	AT3G51960_ATBZIP24,BZIP24	.	-	21.63	14.7
chr2	9083165	9083909	AT2G21195_	.	+	84.21	57.24
chr1	8028158	8029971	AT1G22700_	.	-	86.6	58.87
chr2	11404066	11408326	AT2G26770_SCAB1	.	-	64.25	43.68
chr5	4308129	4310181	AT5G13440_	.	-	73.81	50.18
chr5	17937689	17941292	AT5G44530_	.	+	17.11	11.63
chr1	6966922	6968933	AT1G20090_ARAC4,ATRAC4,ATROP2,ROP2	.	+	73.5	49.97
chr4	15185801	15186005	AT4G31280_	.	-	36.95	25.12
chr3	19659301	19659413	AT3G53015_MIR771A	.	-	13.77	9.36
chr2	11650358	11654143	AT2G27228_CPuORF6	.	+	31.49	21.41
chr2	11650358	11654143	AT2G27230_LHW	.	+	31.49	21.41
chr1	5494533	5495359	AT1G16000_	.	+	33.34	22.67
chr2	11347147	11350993	AT2G26690_AtNPF6.2,NPF6.2	.	-	17.12	11.64
chr1	173251	173466	AT1G01471_	.	+	6.93	4.71
chr1	6914613	6916805	AT1G19920_APS2,ASA1	.	-	87.46	59.48
chr2	6743613	6744830	AT2G15440_	.	-	58.05	39.48
chr2	8485991	8488720	AT2G19620_NDL3	.	-	34.07	23.17
chr3	9223967	9225710	AT3G25440_	.	+	45.05	30.64
chr3	9500116	9502221	AT3G25970_	.	-	22.1	15.03
chr3	4184569	4187453	AT3G13062_	.	+	64.35	43.77
chr2	14936666	14937964	AT2G35585_	.	+	21.54	14.65
chr3	19342024	19343466	AT3G52150_PSRP2	.	+	74.57	50.73
chr2	17409463	17409937	AT2G41730_	.	+	25.24	17.17
chr1	20430769	20431986	AT1G54740_	.	+	27.15	18.47
chr2	14827463	14829802	AT2G35170_	.	+	54.19	36.87
chr1	26430543	26432049	AT1G70190_	.	+	80.34	54.67
chr1	28590325	28591518	AT1G76185_	.	+	67.57	45.98
chr5	8437085	8439104	AT5G24650_	.	+	61.6	41.92
chr5	4056187	4059580	AT5G12850_	.	+	59.1	40.22
chr4	14161681	14163195	AT4G28700_AMT1;4	.	+	27.51	18.72
chr3	7220799	7224090	AT3G20650_	.	-	59.57	40.54
chr5	3940532	3941205	AT5G12190_	.	-	129.2	87.94
chr3	3091043	3091766	AT3G10020_	.	-	34.47	23.46
chr4	359315	360493	AT4G00860_AT0ZI1,ATOZI1	.	-	79.2	53.91
chr2	17577714	17580392	AT2G42170_	.	+	27.24	18.54
chr3	4450745	4452624	AT3G13620_PUT4	.	-	67.15	45.71
chr3	1314479	1315045	AT3G04800_ATTIM23-3,TIM23-3	.	-	34.51	23.49
chr1	24028918	24030780	AT1G64660_ATMGL,MGL	.	+	31.66	21.55
chr1	23387631	23390816	AT1G63080_	.	-	27.34	18.61
chr1	2967940	2971498	AT1G09195_	.	-	36.59	24.91
chr1	25235271	25236878	AT1G67350_	.	+	72.07	49.07
chr5	18228910	18231522	AT5G45110_ATNPR3,NPR3	.	+	53.05	36.12
chr3	9749904	9753772	AT3G26560_	.	-	62.59	42.62
chr5	26041174	26042406	AT5G65170_	.	+	35.58	24.23
chr3	3672120	3674075	AT3G11630_	.	+	82.76	56.37
chr4	9638174	9641756	AT4G17150_	.	+	54.17	36.9
chr3	7015797	7018360	AT3G20090_CYP705A18	.	+	22.05	15.02
chr4	5377064	5380645	AT4G08460_	.	-	64.3	43.81
chr5	22889132	22891853	AT5G56530_	.	+	28.68	19.54
chr3	20196266	20197650	AT3G54560_HTA11	.	+	31.38	21.38
chr3	17268875	17269510	AT3G46900_COPT2	.	+	29.66	20.21
chr4	7156252	7158042	AT4G11910_	.	+	26.24	17.88
chr1	7690802	7692438	AT1G21900_p24delta5	.	-	66.97	45.64
chr5	22955841	22955912	AT5G56745_	.	+	13.84	9.43
chr4	12789030	12792722	AT4G24820_	.	-	57.95	39.5
chr1	23796203	23796555	AT1G64107_	.	-	24.94	17
chr1	511765	513624	AT1G02470_	.	-	21.36	14.56
chr4	14084749	14086844	AT4G28510_ATPHB1,PHB1	.	-	54.08	36.87
chr4	16955518	16960170	AT4G35790_ATPLDDELTA,PLDDELTA	.	-	64.52	43.99
chr1	18770937	18774686	AT1G50660_	.	+	51.33	35
chr5	22538613	22543474	AT5G55660_	.	+	47.85	32.63
chr3	8473775	8475888	AT3G23600_	.	+	69.02	47.07
chr5	14997168	14998219	AT5G37760_	.	+	25.25	17.22
chr5	26181093	26183997	AT5G65500_	.	-	23.49	16.02
chr5	4059686	4061950	AT5G12860_DiT1	.	-	141.23	96.35
chr2	16578824	16582404	AT2G39750_	.	-	64.6	44.07
chr3	2118169	2120059	AT3G06710_	.	+	39.02	26.62
chr3	10213996	10216736	AT3G27570_	.	-	82.78	56.49
chr3	6048916	6052552	AT3G17700_ATCNGC20,CNBT1,CNGC20	.	+	65.18	44.48
chr1	23488884	23489530	AT1G63320_	.	-	7.58	5.17
chr5	1575006	1576731	AT5G05320_	.	-	22.73	15.51
chr5	25328119	25329799	AT5G63140_ATPAP29,PAP29,PAP29	.	+	38.15	26.04
chr3	7609143	7610717	AT3G21610_	.	-	82.38	56.24
chr1	6816702	6819542	AT1G19715_	.	-	22.81	15.57
chr1	23998725	24001950	AT1G64610_	.	-	44.34	30.27
chr5	9572100	9574135	AT5G27210_Cand8	.	-	45.13	30.81
chr5	22662576	22665087	AT5G55960_	.	+	61.9	42.26
chr5	26785106	26786383	AT5G67110_ALC	.	-	36.92	25.21
chr1	9515135	9516940	AT1G27400_	.	+	80.16	54.74
chr3	88054	89422	AT3G01290_AtHIR2,HIR2	.	-	27.19	18.57
chr5	16297898	16300001	AT5G40720_	.	+	27.16	18.55
chr2	10617263	10620034	AT2G24960_	.	+	43.05	29.41
chr3	16297979	16299847	AT3G44750_ATHD2A,HD2A,HDA3,HDT1	.	+	51.93	35.48
chr2	11860218	11861475	AT2G27830_	.	+	24.88	17
chr2	18977344	18979001	AT2G46210_AtSLD2,SLD2	.	+	52.78	36.07
chr1	6257851	6261457	AT1G18190_GC2	.	-	46.2	31.58
chr1	23347561	23352697	AT1G63010_	.	-	32.17	21.99
chr5	14302739	14305176	AT5G36290_	.	+	63.94	43.71
chr5	26396467	26397500	AT5G66000_	.	-	38.29	26.18
chr1	28347055	28348735	AT1G75510_	.	-	74.99	51.28
chr2	9645313	9647613	AT2G22680_WAVH1	.	+	36.34	24.85
chr5	23558114	23559353	AT5G58240_FHIT	.	-	63.79	43.63
chr2	18524387	18526827	AT2G44920_	.	+	51.77	35.41
chr3	21843407	21853860	AT3G59100_ATGSL11,gsl11,GSL11	.	+	17.62	12.05
chr4	17307769	17309867	AT4G36720_HVA22K	.	+	48.62	33.26
chr1	29665218	29667656	AT1G78910_	.	+	38.02	26.01
chr5	17688788	17691939	AT5G43960_	.	-	71.08	48.63
chr1	9327156	9327251	AT1G26916_	.	+	7.78	5.32
chr4	5870289	5871160	AT4G09210_	.	+	1.32	0.9
chr5	25223727	25225021	AT5G62820_	.	-	27.51	18.82
chr5	14534613	14540299	AT5G36880_ACS	.	-	46.26	31.65
chr5	4691022	4691137	AT5G14545_MIR398B	.	+	30.56	20.91
chr1	21327360	21329763	AT1G57590_	.	-	22.33	15.28
chr1	30392133	30394383	AT1G80870_	.	+	43.54	29.8
chr1	10887607	10890332	AT1G30690_	.	+	47.64	32.61
chr1	11418625	11420837	AT1G31830_PUT2	.	-	57.12	39.1
chr3	461148	464174	AT3G02300_	.	+	47.84	32.75
[truncated: 3,001 more rows]

## Sheet: a3.bed
chr	START	END	GENE	NA	strand	H3K36me3 signal in WT	H3K36me3 signal in Sdg8 KO
chr2	1008460	1014122	AT2G03330_	.	+	20.12	16.64	1.20901
chr5	21011418	21013657	AT5G51730_	.	+	43.49	35.97	1.20901
chr5	25692453	25694053	AT5G64230_	.	+	25.68	21.24	1.20894
chr5	20729612	20733926	AT5G50950_FUM2	.	+	19.03	15.74	1.20889
chr5	26952352	26955543	AT5G67570_DG1,EMB1408,EMB246	.	+	51.09	42.27	1.20861
chr5	13910418	13911160	AT5G35740_	.	-	22.37	18.51	1.20842
chr1	4501581	4503591	AT1G13195_	.	-	62.8	51.97	1.20835
chr5	26583431	26583544	AT5G66607_	.	-	25.35	20.98	1.20819
chr1	25610923	25612202	AT1G68330_	.	+	13.99	11.58	1.20794
chr4	18276505	18279848	AT4G39270_	.	+	56.53	46.8	1.20786
chr4	18265885	18267829	AT4G39230_	.	-	39.34	32.57	1.2078
chr1	29549649	29552438	AT1G78570_ATRHM1,RHM1,ROL1	.	+	60.1	49.76	1.20776
chr1	16933792	16934511	AT1G44830_	.	+	19.7	16.31	1.20772
chr2	17036463	17040063	AT2G40820_	.	-	25.34	20.98	1.20772
chr1	3009055	3009880	AT1G09310_	.	+	25.58	21.18	1.20765
chr2	11311004	11315096	AT2G26590_RPN13	.	-	59.61	49.36	1.20762
chr1	21072855	21074877	AT1G56280_ATDI19,DI19	.	-	70.64	58.5	1.20749
chr4	6052352	6054397	AT4G09580_	.	-	66.15	54.79	1.2073
chr1	28335502	28336706	AT1G75490_	.	+	25.22	20.89	1.20718
chr5	3821803	3824275	AT5G11860_SSP5	.	-	51.56	42.71	1.20716
chr4	11130762	11133086	AT4G20770_	.	-	18.29	15.15	1.20712
chr1	7184485	7185267	AT1G20710_WOX10,WOX13B	.	+	13.4	11.1	1.20702
chr3	1523463	1526166	AT3G05340_	.	-	59.18	49.03	1.20697
chr4	16256733	16258771	AT4G33910_	.	-	68.12	56.44	1.20691
chr3	951628	953840	AT3G03773_	.	+	60.54	50.16	1.2069
chr3	8868583	8872201	AT3G24430_HCF101	.	-	63.46	52.58	1.20688
chr1	10379020	10382123	AT1G29690_CAD1	.	-	56.3	46.65	1.20682
chr1	3195824	3200291	AT1G09840_AtHIR1,ATSK41,HIR1,SK41	.	-	48.25	39.98	1.2068
chr3	5296847	5297599	AT3G15630_	.	-	31.45	26.06	1.20675
chr4	17967107	17969958	AT4G38360_LAZ1	.	+	73.77	61.13	1.20674
chr1	27906909	27909358	AT1G74200_AtRLP16,RLP16	.	-	17.97	14.89	1.20671
chr3	4910697	4912173	AT3G14600_	.	+	68.09	56.43	1.20659
chr4	17621886	17624285	AT4G37490_CYC1,CYCB1,CYCB1;1	.	-	21.08	17.47	1.20652
chr5	2108493	2112256	AT5G06810_	.	+	51.46	42.65	1.20652
chr1	11931203	11931801	AT1G32928_	.	+	17.46	14.47	1.20649
chr3	21650596	21654200	AT3G58560_	.	-	55.51	46.01	1.20643
chr4	12021763	12023467	AT4G22940_	.	-	14.72	12.2	1.20639
chr1	22904486	22907630	AT1G61970_	.	+	50.4	41.78	1.20627
chr5	20442647	20445991	AT5G50210_OLD5,QS,SUFE3	.	+	52.8	43.77	1.20626
chr2	14047389	14047426	AT2G33140_	.	-	11.69	9.69	1.20619
chr5	22156498	22158054	AT5G54540_	.	+	94.03	77.96	1.2061
chr3	23146828	23147951	AT3G62580_	.	+	95.72	79.37	1.20597
chr5	1970029	1974527	AT5G06460_ATUBA2,UBA	.	+	54.98	45.59	1.20592
chr4	11336479	11339052	AT4G21300_	.	+	43.17	35.8	1.20581
chr4	15656681	15660223	AT4G32440_	.	+	74.4	61.7	1.2058
chr5	2882427	2884229	AT5G09290_	.	+	11.36	9.42	1.20573
chr3	6541535	6541807	AT3G18957_	.	-	20.33	16.86	1.20569
chr2	8169546	8172523	AT2G18876_	.	+	43.92	36.43	1.20554
chr2	10344358	10345510	AT2G24310_	.	+	36.53	30.3	1.20554
chr1	8219869	8224469	AT1G23190_PGM3	.	+	45.92	38.09	1.20551
chr3	20368168	20370098	AT3G54970_	.	-	39.88	33.08	1.2055
chr3	6408318	6411064	AT3G18620_	.	+	53.03	43.99	1.20545
chr5	644279	648466	AT5G02830_	.	-	67.6	56.08	1.20538
chr1	10330514	10332326	AT1G29550_	.	+	41.31	34.27	1.20537
chr5	24339229	24342590	AT5G60548_CPuORF62	.	+	47.38	39.31	1.20524
chr3	18387302	18389564	AT3G49601_	.	-	65.42	54.29	1.20497
chr4	14304921	14305721	AT4G29020_	.	+	27.98	23.22	1.20491
chr3	812448	814027	AT3G03420_	.	+	75.13	62.36	1.20475
chr3	6701273	6704226	AT3G19340_	.	-	61.37	50.94	1.20471
chr3	5459172	5460790	AT3G16100_ATRAB7D,ATRABG3C,RABG3c	.	+	55.08	45.72	1.20468
chr2	13919127	13925351	AT2G32810_BGAL9,BGAL9	.	-	40.82	33.89	1.20442
chr3	1874291	1876913	AT3G06190_ATBPM2,BPM2	.	-	85.38	70.89	1.20437
chr4	18236355	18240478	AT4G39160_	.	+	33.29	27.64	1.20434
chr2	764547	767436	AT2G02730_	.	-	60.05	49.86	1.20433
chr1	1036537	1040224	AT1G04020_ATBARD1,BARD1,ROW1	.	+	16.2	13.45	1.20431
chr4	1207725	1209287	AT4G02730_AtWDR5b,WDR5b	.	+	72.33	60.06	1.20426
chr5	20739419	20741281	AT5G50990_	.	+	25.52	21.19	1.20425
chr5	10344024	10348234	AT5G28400_	.	-	9.37	7.78	1.20411
chr5	16314850	16316719	AT5G40770_ATPHB3,EER3,PHB3	.	-	90.1	74.84	1.20387
chr4	15504662	15507176	AT4G32070_Phox4	.	-	88.27	73.32	1.20387
chr4	16698334	16700321	AT4G35080_	.	+	74.7	62.05	1.20383
chr2	7989476	7990586	AT2G18400_	.	-	70.04	58.18	1.20382
chr5	7668229	7669315	AT5G22930_	.	-	16.47	13.68	1.2038
chr1	10169084	10169619	AT1G29100_	.	+	21.33	17.72	1.20361
chr2	12882734	12882804	AT2G30190_	.	+	17.37	14.43	1.2036
chr4	10991615	10992159	AT4G20362_	.	-	19.62	16.3	1.20356
chr1	26604855	26607503	AT1G70560_CKRC1,SAV3,TAA1,WEI8	.	+	20.4	16.95	1.20342
chr4	12662561	12667199	AT4G24520_AR1,ATR1	.	-	53.25	44.25	1.20334
chr1	5454785	5457022	AT1G15860_	.	+	60.37	50.17	1.20327
chr5	4506232	4507842	AT5G13970_	.	-	70.14	58.29	1.20326
chr5	3597247	3598521	AT5G11280_	.	+	71.51	59.43	1.20323
chr4	7753311	7754086	AT4G13320_	.	+	17.11	14.22	1.20309
chr1	2342198	2344271	AT1G07615_	.	-	49.28	40.96	1.20308
chr1	25775741	25777874	AT1G68650_	.	+	48.11	39.99	1.203
chr1	27475060	27475962	AT1G73040_	.	-	17.24	14.33	1.20293
chr1	27967771	27969879	AT1G74420_ATFUT3,FUT3	.	-	24.83	20.64	1.20291
chr3	18226911	18229610	AT3G49170_EMB2261	.	-	46.59	38.73	1.20289
chr5	21395545	21395629	AT5G52797_MIR870A	.	-	92.29	76.74	1.20261
chr5	24339229	24342590	AT5G60550_ATSNAK1,GRIK2	.	+	47.54	39.53	1.20258
chr3	4956349	4957255	AT3G14760_	.	+	22.02	18.31	1.20251
chr5	26732889	26736146	AT5G66950_	.	+	61.41	51.07	1.20243
chr5	19711542	19715910	AT5G48610_	.	+	48.44	40.29	1.20223
chr5	2972639	2974776	AT5G09580_	.	+	46.26	38.48	1.20213
chr3	21349507	21353174	AT3G57650_LPAT2	.	+	53.18	44.24	1.20203
chr5	17914023	17916019	AT5G44450_	.	-	58.25	48.46	1.20198
chr3	4608383	4610399	AT3G13960_AtGRF5,GRF5	.	+	24.04	20	1.2019
chr4	8578978	8581331	AT4G15030_	.	+	61.64	51.29	1.20175
chr4	9480076	9481738	AT4G16850_	.	+	52.23	43.46	1.20175
chr2	19126872	19129105	AT2G46572_	.	-	47.54	39.56	1.20167
chr3	8963770	8966616	AT3G24560_RSY3	.	+	32.11	26.72	1.20165
chr3	3405815	3407434	AT3G10880_	.	+	20.49	17.05	1.20164
chr3	23283609	23285540	AT3G63000_NPL41	.	+	125.17	104.17	1.20157
chr1	11216914	11217393	AT1G31335_	.	-	23	19.14	1.20157
chr5	5749762	5753643	AT5G17440_	.	+	59.07	49.16	1.20155
chr5	2959734	2961271	AT5G09530_PELPK1,PRP10	.	-	16.57	13.79	1.20145
chr1	2189928	2190659	AT1G07135_	.	-	24.27	20.2	1.20139
chr3	9646805	9648584	AT3G26330_CYP71B37	.	-	16.7	13.9	1.20129
chr3	18875399	18877534	AT3G50780_	.	-	49.01	40.8	1.20118
chr5	25493717	25497632	AT5G63700_	.	-	46.22	38.48	1.20109
chr5	3378053	3378867	AT5G10700_	.	-	95.22	79.28	1.20103
chr1	293342	295040	AT1G01800_	.	+	76.27	63.51	1.20088
chr5	22496196	22500543	AT5G55540_LOP1,TRN1	.	-	33.17	27.62	1.20087
chr5	3476839	3477704	AT5G10990_SAUR69	.	+	27.73	23.09	1.20087
chr5	21257834	21257915	AT5G52355_	.	-	16.85	14.03	1.20085
chr1	6481113	6483596	AT1G18800_NRP2	.	-	47.06	39.19	1.20077
chr1	26161528	26163496	AT1G69570_	.	-	20.57	17.13	1.2007
chr1	5776177	5778484	AT1G16890_AtUBC36,UBC13B,UBC36	.	-	72.5	60.38	1.2007
chr2	9774853	9778528	AT2G22970_SCPL11	.	+	14.89	12.4	1.20064
chr3	11877866	11878458	AT3G30220_	.	-	11.49	9.57	1.20042
chr1	7262043	7265438	AT1G20880_	.	-	68.47	57.04	1.20035
chr3	22334424	22337617	AT3G60420_	.	+	19.29	16.07	1.20025
chr5	15823735	15825492	AT5G39520_	.	-	13.84	11.53	1.20017
chr1	817983	819563	AT1G03330_LSM2	.	-	69.3	57.74	1.20017
chr2	18401878	18403416	AT2G44580_	.	-	26.02	21.68	1.20009
chr4	12243671	12248950	AT4G23460_	.	-	38.44	32.03	1.20006
chr3	19039512	19044371	AT3G51290_APSR1	.	+	21.83	18.19	1.2
chr5	25734598	25736071	AT5G64350_ATFKBP12,FKBP12,FKP12	.	-	63.02	52.52	1.19989
chr5	25272033	25273537	AT5G62970_	.	+	17.7	14.75	1.19986
chr5	3578295	3578366	AT5G11225_	.	-	12.78	10.65	1.19981
chr4	1329952	1331139	AT4G03010_	.	+	39.09	32.58	1.19975
chr1	22962340	22968920	AT1G62130_	.	-	37.05	30.88	1.19974
chr3	22314732	22316550	AT3G60370_	.	-	66.64	55.55	1.1996
chr1	17326556	17328728	AT1G47270_AtTLP6,TLP6	.	+	36.3	30.26	1.19954
chr3	21392671	21393744	AT3G57740_	.	+	29.15	24.3	1.19951
chr5	25413356	25415592	AT5G63460_	.	-	66.89	55.77	1.19935
chr5	24402129	24404948	AT5G60700_	.	-	55.17	46	1.1993
chr3	23036880	23036952	AT3G62245_	.	+	15.16	12.64	1.19921
chr4	1756584	1757097	AT4G03811_	.	+	21.18	17.66	1.19921
chr3	262251	265905	AT3G01720_	.	-	48.59	40.52	1.19911
chr1	4197396	4198310	AT1G12340_	.	+	7.94	6.62	1.1991
chr1	5242198	5243227	AT1G15230_	.	-	97.32	81.17	1.19894
chr3	7306147	7308434	AT3G20860_ATNEK5,NEK5	.	+	15.72	13.11	1.19893
chr5	15665502	15666444	AT5G39130_	.	-	6.5	5.42	1.1989
chr4	2990006	2992618	AT4G05631_	.	-	10.36	8.64	1.19884
chr1	5946764	5951473	AT1G17360_	.	+	29.84	24.89	1.1988
chr1	1601148	1605027	AT1G05460_SDE3	.	-	41	34.2	1.19877
chr5	25281714	25283176	AT5G63010_	.	+	60.06	50.1	1.19876
chr1	7949476	7950900	AT1G22500_AtATL15,ATL15	.	+	31.3	26.11	1.1987
chr3	20964857	20968019	AT3G56590_	.	+	63.89	53.31	1.19842
chr3	20899099	20902981	AT3G56370_	.	-	40.85	34.09	1.19824
chr3	9025849	9029948	AT3G24715_	.	+	11.42	9.53	1.19811
chr5	3102877	3105864	AT5G09950_MEF7	.	-	23.46	19.58	1.19806
chr4	15233074	15237109	AT4G31390_ABC1K1,ACDO1,AtACDO1,PGR6	.	+	61.59	51.41	1.19798
chr1	30082078	30083894	AT1G79970_	.	+	50.89	42.48	1.19793
chr2	13532680	13537741	AT2G31830_5PTase14	.	-	16.94	14.14	1.19788
chr1	18035967	18036510	AT1G48750_	.	+	24.28	20.27	1.19773
chr4	14297044	14302147	AT4G29010_AIM1	.	-	54.9	45.84	1.1976
chr3	8788853	8793371	AT3G24255_	.	+	8.78	7.33	1.19755
chr3	5768401	5770380	AT3G16890_PPR40	.	-	59.16	49.4	1.19753
chr1	5563087	5568368	AT1G16270_	.	+	42.61	35.58	1.19753
chr4	9566902	9569913	AT4G17000_	.	-	20.79	17.36	1.19747
chr5	16667436	16667507	AT5G41675_	.	-	6.6	5.51	1.19746
chr5	6779854	6782482	AT5G20070_ATNUDT19,ATNUDX19,NUDX19	.	+	89.5	74.75	1.1973
chr4	16434280	16437322	AT4G34370_ARI1,ATARI1	.	+	60.74	50.73	1.19728
chr1	11797335	11798602	AT1G32630_	.	+	54.86	45.82	1.19725
chr3	5018275	5020273	AT3G14920_	.	+	75.08	62.71	1.19723
chr4	14990341	14993069	AT4G30780_	.	+	66.33	55.41	1.19704
chr3	1091147	1094346	AT3G04160_	.	-	55.65	46.49	1.19699
chr3	6874603	6875856	AT3G19790_	.	-	30.44	25.43	1.19693
chr1	30183541	30186586	AT1G80280_	.	-	37.37	31.22	1.19693
chr1	20061701	20065713	AT1G53730_SRF6	.	+	41.21	34.43	1.19686
chr4	15238584	15239282	AT4G31398_	.	-	16.47	13.76	1.1968
chr1	22934688	22935343	AT1G62045_	.	-	16.23	13.56	1.19676
chr2	18039311	18040722	AT2G43440_	.	+	25.38	21.21	1.19651
chr2	11678400	11679797	AT2G27290_	.	-	88.31	73.81	1.19642
chr3	22270337	22272113	AT3G60250_CKB3	.	-	82.54	68.99	1.19638
chr2	6983892	6985462	AT2G16070_PDV2	.	-	90.9	75.98	1.19634
chr5	7314583	7321683	AT5G22090_	.	-	24.98	20.88	1.19627
chr1	25809298	25810130	AT1G68725_AGP19,ATAGP19	.	+	31.75	26.54	1.19623
chr5	17835849	17839254	AT5G44280_ATRING1A,RING1A	.	-	46.51	38.88	1.19619
chr4	8424667	8426558	AT4G14710_ATARD2	.	-	55.78	46.63	1.19618
chr5	16285711	16287793	AT5G40670_	.	+	61.52	51.43	1.19615
chr3	22706312	22708509	AT3G61370_	.	+	50.06	41.85	1.19613
chr1	2706924	2709531	AT1G08550_AVDE1,NPQ1	.	+	50.31	42.06	1.1961
chr2	18221769	18224104	AT2G44040_	.	-	38.48	32.17	1.19608
chr1	3592746	3595077	AT1G10780_	.	-	34.91	29.19	1.19589
chr1	681396	687315	AT1G02990_	.	-	46.7	39.05	1.19585
chr1	26288278	26293053	AT1G69830_AMY3,ATAMY3	.	-	46.09	38.54	1.19585
chr2	12959199	12960810	AT2G30410_KIS,TFCA	.	+	60.02	50.19	1.19582
chr1	28756521	28759297	AT1G76620_	.	+	21	17.56	1.19579
chr2	12633091	12633805	AT2G29500_	.	-	24.12	20.17	1.19574
chr1	2972842	2976750	AT1G09210_AtCRT1b,CRT1b	.	-	51.19	42.81	1.1957
chr5	2855638	2856540	AT5G08770_	.	-	89.63	74.96	1.19568
chr1	8420265	8422985	AT1G23820_SPDS1	.	+	55.54	46.45	1.19565
chr5	3343593	3343725	AT5G10572_SNOR77	.	+	30.83	25.79	1.19535
chr1	22247474	22249636	AT1G60390_PG1	.	-	22.02	18.42	1.19533
chr4	14713518	14713661	AT4G30097_	.	-	81.37	68.09	1.19501
chr2	16430085	16432557	AT2G39350_ABCG1	.	-	27.75	23.22	1.19501
chr1	19152615	19153929	AT1G51650_	.	+	86.79	72.63	1.19493
chr1	465718	467844	AT1G02340_FBI1,HFR1,REP1,RSF1	.	-	24.39	20.41	1.19491
chr1	25834709	25839319	AT1G68790_CRWN3,LINC3	.	-	47.32	39.6	1.1949
chr3	20634202	20636506	AT3G55620_eIF6A,emb1624	.	+	74.02	61.95	1.1948
chr4	6760867	6763272	AT4G11080_3xHMG-box1	.	-	31.4	26.28	1.19475
chr1	17154921	17159397	AT1G45229_	.	-	31.77	26.59	1.19474
chr5	23883417	23885208	AT5G59180_NRPB7	.	+	57.85	48.42	1.19471
chr3	22382458	22382778	AT3G60560_	.	+	21.36	17.88	1.19452
chr2	17200659	17202618	AT2G41250_	.	-	60.11	50.32	1.19452
chr2	11861994	11863886	AT2G27840_HD2D,HDA13,HDT04,HDT4	.	+	60.73	50.84	1.19449
chr1	10413881	10420524	AT1G29750_RKF1	.	-	31.34	26.24	1.19429
chr3	8139235	8141985	AT3G22960_PKP-ALPHA,PKP1	.	+	98.84	82.76	1.19427
chr3	19903313	19905489	AT3G53710_AGD6	.	-	100.66	84.29	1.19419
chr1	14184749	14184853	AT1G37162_	.	-	14.45	12.1	1.19405
chr3	4429298	4432159	AT3G13570_At-SCL30A,SCL30A	.	-	60.05	50.29	1.19404
chr3	21894134	21895623	AT3G59220_ATPIRIN1,PRN,PRN1	.	+	15.56	13.03	1.19402
chr3	19049602	19051565	AT3G51320_	.	-	67.64	56.65	1.19396
chr1	2395451	2397345	AT1G07728_	.	+	93.63	78.43	1.19378
chr3	19267234	19267784	AT3G51915_	.	-	18.35	15.37	1.19376
chr2	13549861	13553844	AT2G31870_PARG1,TEJ	.	-	44.43	37.22	1.19366
chr3	9553708	9555611	AT3G26130_	.	-	12.45	10.43	1.19349
chr1	12219371	12219502	AT1G33709_	.	-	14.61	12.24	1.19347
chr5	21330639	21334811	AT5G52560_ATUSP,USP	.	+	47.43	39.74	1.19346
chr4	11620998	11623797	AT4G21903_	.	-	19.12	16.02	1.19339
chr5	3166439	3168297	AT5G10110_	.	-	55.3	46.34	1.19331
chr3	939952	942094	AT3G03750_SDG20,SUVR3	.	+	70	58.66	1.19328
chr2	10187043	10190412	AT2G23950_	.	-	19.75	16.55	1.19324
chr4	14470459	14472232	AT4G29420_	.	-	66.08	55.38	1.19318
chr2	16658656	16660437	AT2G39900_WLIM2a	.	+	35.1	29.42	1.193
chr1	27562815	27565177	AT1G73310_scpl4	.	-	16.62	13.93	1.19297
chr1	20363448	20366061	AT1G54520_	.	+	78.28	65.62	1.1929
chr2	9739457	9741104	AT2G22870_EMB2001	.	+	75.24	63.08	1.19274
chr4	10884197	10888270	AT4G20140_GSO1	.	+	22.89	19.19	1.19271
chr1	599416	602038	AT1G02740_	.	-	48.83	40.94	1.19267
chr1	22737543	22739430	AT1G61620_	.	+	78.11	65.49	1.19267
chr1	8529143	8532212	AT1G24120_ARL1	.	-	53.17	44.58	1.19264
chr1	4126066	4128310	AT1G12160_	.	+	19.56	16.4	1.19257
chr5	19292608	19294737	AT5G47570_	.	-	74.89	62.8	1.19249
chr1	3844581	3846872	AT1G11420_ATDUF2,DUF2	.	-	20.2	16.94	1.19233
chr5	24102972	24103787	AT5G59820_AtZAT12,RHL41,ZAT12	.	+	20.21	16.95	1.19222
chr5	26653658	26657536	AT5G66760_SDH1-1	.	+	60.78	50.98	1.19219
chr1	28734234	28738917	AT1G76580_	.	+	47.76	40.06	1.19216
chr1	25711869	25712238	AT1G68526_	.	-	17.61	14.77	1.19215
chr1	28537673	28540637	AT1G76040_CPK29	.	+	22.77	19.1	1.19205
chr5	24262864	24263843	AT5G60290_	.	+	52.46	44.01	1.19196
chr5	1437614	1438770	AT5G04910_	.	+	68.26	57.27	1.19186
chr2	18241692	18246498	AT2G44100_AT-GDI1,ATGDI1,GDI1	.	+	45.72	38.36	1.19182
chr1	12485967	12492169	AT1G34260_FAB1D	.	+	42.68	35.81	1.19179
chr1	18470075	18473823	AT1G49890_QWRF2	.	+	61.58	51.67	1.19176
chr3	19503223	19504973	AT3G52580_	.	+	59.69	50.09	1.19162
chr3	8928169	8929329	AT3G24506_	.	-	87.43	73.37	1.19161
chr1	4956257	4958076	AT1G14480_	.	+	18.4	15.44	1.19159
chr5	17176384	17178018	AT5G42830_	.	+	18.78	15.76	1.1915
chr1	5473565	5478259	AT1G15940_	.	+	38.26	32.11	1.19147
chr3	5797179	5799683	AT3G17000_UBC32	.	+	64.34	54	1.19145
chr3	19984941	19985011	AT3G53965_	.	+	15.74	13.21	1.19138
chr4	10431520	10437431	AT4G19040_EDR2	.	-	52.52	44.09	1.19116
chr2	239705	240520	AT2G01530_MLP329,ZCE2	.	+	21.68	18.2	1.1911
chr4	821685	823523	AT4G01900_GLB1,PII	.	+	51.1	42.9	1.1911
chr3	18492408	18494139	AT3G49870_ARLA1C,ATARLA1C	.	-	81.59	68.5	1.19107
chr4	10562023	10563757	AT4G19350_EMB3006	.	-	49.3	41.39	1.19106
chr3	19587821	19591947	AT3G52850_ATELP,ATELP1,ATVSR1,BP-80,BP80,BP80-1;1,BP80B,GFS1,VSR1,VSR1;1	.	+	64.47	54.13	1.19099
chr3	19271624	19273064	AT3G51930_	.	+	28.49	23.92	1.19097
chr1	28023627	28024726	AT1G74590_ATGSTU10,GSTU10	.	-	18.45	15.49	1.19097
chr4	8334176	8337273	AT4G14500_	.	+	71.83	60.32	1.19078
chr1	2748398	2751278	AT1G08640_CJD1	.	-	69.28	58.18	1.19075
chr5	20090776	20093346	AT5G49520_ATWRKY48,WRKY48	.	+	25.15	21.12	1.19072
chr5	16171374	16173226	AT5G40410_	.	+	17.67	14.84	1.19057
chr3	9831036	9831858	AT3G26742_	.	+	14.74	12.38	1.19048
chr4	8951533	8957632	AT4G15730_	.	-	27.31	22.94	1.19041
chr1	4572419	4576632	AT1G13350_	.	-	47.82	40.17	1.19039
chr5	7554928	7560073	AT5G22740_ATCSLA02,ATCSLA2,CSLA02,CSLA2	.	-	17.56	14.75	1.19038
chr1	27359232	27361016	AT1G72680_ATCAD1,CAD1	.	-	73	61.33	1.19025
chr3	18543560	18543709	AT3G50022_	.	-	32.34	27.17	1.19021
chr4	18209399	18215056	AT4G39080_VHA-A3	.	+	65.84	55.32	1.19013
chr5	1388155	1388319	AT5G04790_	.	-	67.66	56.85	1.19012
chr5	26950309	26952211	AT5G67560_ARLA1D,ATARLA1D	.	+	70.3	59.07	1.19008
chr4	8070189	8075501	AT4G13970_	.	-	53.53	44.98	1.19004
chr5	22209472	22214134	AT5G54670_ATK3,KATC	.	+	20.97	17.62	1.19002
chr5	17829626	17831225	AT5G44260_AtTZF5,TZF5	.	-	27.74	23.31	1.18997
chr4	10974463	10979464	AT4G20320_	.	+	18.56	15.6	1.18962
chr4	14971906	14975519	AT4G30720_PDE327	.	-	55.27	46.46	1.18958
chr5	7404004	7405765	AT5G22360_ATVAMP714,VAMP714,VAMP714	.	-	77.25	64.94	1.18953
chr2	11595292	11596542	AT2G27130_	.	+	16	13.45	1.18945
chr2	16726484	16728185	AT2G40060_CLC2	.	+	73.01	61.38	1.18944
chr2	16410109	16413484	AT2G39300_	.	-	15	12.61	1.18938
chr2	17711032	17712330	AT2G42540_COR15,COR15A	.	-	20.72	17.42	1.18933
chr4	293641	297314	AT4G00720_ASKTHETA,ATSK32,SK32	.	-	62.08	52.2	1.18924
chr1	9191607	9192401	AT1G26600_CLE9	.	+	19.16	16.11	1.18921
chr2	12159276	12159407	AT2G28426_	.	-	56.34	47.38	1.18907
chr3	1640393	1643253	AT3G05640_	.	-	14.08	11.84	1.18903
chr3	2252019	2253528	AT3G07110_	.	+	99.58	83.75	1.18899
chr4	12314025	12314829	AT4G23610_	.	+	27.37	23.02	1.18888
chr4	14569728	14573177	AT4G29750_	.	+	49.4	41.55	1.18888
chr5	18542973	18547205	AT5G45720_	.	-	19.38	16.3	1.18884
chr1	45296	47019	AT1G01080_	.	-	61.38	51.63	1.18881
chr3	8704429	8705413	AT3G24110_	.	-	18.38	15.46	1.18875
chr4	6713557	6718550	AT4G10960_UGE5	.	-	26.57	22.35	1.18873
chr3	8259855	8262028	AT3G23160_	.	-	68.47	57.6	1.18868
chr5	16381314	16385319	AT5G40890_ATCLC-A,ATCLCA,CLC-A,CLC-A,CLCA	.	-	20.47	17.22	1.18862
chr1	11469482	11470010	AT1G31935_	.	+	16	13.46	1.18857
chr3	3183403	3185348	AT3G10290_	.	-	33.4	28.1	1.18855
chr1	17796335	17796784	AT1G48195_	.	+	20.92	17.6	1.18853
chr4	12761283	12763781	AT4G24760_	.	-	56.98	47.95	1.18828
chr1	57269	59167	AT1G01120_KCS1	.	-	21.26	17.89	1.18827
chr1	5929909	5931831	AT1G17330_	.	+	59.77	50.3	1.18823
chr1	11122658	11124155	AT1G31160_HINT	.	-	59.33	49.93	1.18823
chr3	19613118	19614027	AT3G52900_	.	+	18.55	15.61	1.18822
chr5	26200014	26203778	AT5G65560_	.	-	47.97	40.37	1.18821
chr2	13977933	13983535	AT2G32950_ATCOP1,COP1,DET340,EMB168,FUS1	.	+	72.1	60.68	1.18817
chr3	19209585	19210744	AT3G51790_AtCCME,ATG1,G1	.	-	119.03	100.18	1.18814
chr1	28768879	28771409	AT1G76660_	.	-	47.04	39.59	1.18813
chr3	9494697	9496092	AT3G25940_	.	+	67.32	56.66	1.18811
chr5	26337665	26339746	AT5G65810_CGR3	.	-	57.53	48.42	1.18811
chr4	12667358	12670013	AT4G24530_	.	-	44.65	37.58	1.18808
chr1	17566511	17569297	AT1G47740_	.	+	47.75	40.19	1.18806
chr1	7518946	7521504	AT1G21480_	.	-	59.69	50.24	1.18806
chr4	11917057	11917879	AT4G22666_	.	+	22.86	19.24	1.18805
chr1	6520941	6521124	AT1G18879_MIR837A	.	+	3.53	2.97	1.18792
chr2	6213972	6215901	AT2G14560_LURP1	.	+	20.41	17.18	1.1879
chr5	26944028	26946365	AT5G67540_	.	-	54.2	45.63	1.18777
chr4	14871109	14872176	AT4G30410_	.	-	23.47	19.76	1.18766
chr2	18193151	18195582	AT2G43930_	.	+	11.83	9.96	1.18756
chr1	12099482	12104601	AT1G33390_ATFAS4,FAS4	.	-	38.18	32.15	1.1875
chr1	27788983	27789054	AT1G73900_	.	+	2.46	2.07	1.1875
chr5	8530978	8533867	AT5G24830_	.	+	55.09	46.39	1.1875
chr1	10136230	10139208	AT1G29050_TBL38	.	-	16.02	13.49	1.18741
chr2	19404820	19407084	AT2G47260_ATWRKY23,WRKY23	.	-	23.75	20	1.18741
chr3	22180025	22181776	AT3G60050_	.	-	55.24	46.52	1.18741
chr5	26809135	26809689	AT5G67190_DEAR2	.	-	36.63	30.85	1.1873
chr1	27943462	27947109	AT1G74330_	.	-	40.82	34.38	1.18726
chr2	17895883	17899374	AT2G43040_NPG1	.	-	19.71	16.6	1.18724
chr3	4952004	4953423	AT3G14740_	.	-	24.47	20.61	1.1872
chr1	3506186	3509006	AT1G10610_	.	+	15.34	12.92	1.18716
chr3	19431371	19434403	AT3G52430_ATPAD4,PAD4	.	+	18.77	15.81	1.1871
chr1	18501570	18504609	AT1G49970_CLPR1,NCLPP5,SVR2	.	-	78.09	65.79	1.18693
chr1	19859267	19860976	AT1G53260_	.	-	15.74	13.26	1.18689
chr3	19607957	19612186	AT3G52890_KIPK	.	+	40.7	34.29	1.18688
chr4	15306654	15308347	AT4G31580_At-RSZ22,AtRSZ22,RSZ22,RSZP22,SRZ-22,SRZ22	.	+	83.46	70.32	1.18683
chr5	17154776	17155757	AT5G42780_AtHB27,HB27,ZHD13	.	+	27.38	23.07	1.18674
chr1	10546591	10548151	AT1G30070_	.	-	56.11	47.28	1.18672
chr3	21196550	21199183	AT3G57290_ATEIF3E-1,ATINT6,EIF3E,INT-6,INT6,TIF3E1	.	-	79.7	67.16	1.18669
chr4	15636415	15638040	AT4G32390_	.	+	130.63	110.09	1.18656
chr5	2521534	2524201	AT5G07910_	.	-	44.39	37.41	1.18653
chr4	13503086	13504780	AT4G26860_	.	-	58.48	49.29	1.18641
chr1	11689106	11691531	AT1G32400_TOM2A	.	-	75.67	63.78	1.18639
chr1	3009941	3012363	AT1G09320_	.	-	69.18	58.31	1.18639
chr2	16165952	16168386	AT2G38660_	.	+	50.86	42.87	1.18633
chr5	14839047	14840301	AT5G37415_AGL105	.	-	16.29	13.73	1.18632
chr5	6127797	6129285	AT5G18470_	.	+	23.12	19.49	1.18615
chr2	15972993	15977180	AT2G38120_AtAUX1,AUX1,MAP1,PIR1,WAV5	.	+	19.18	16.17	1.18603
chr3	8436671	8442846	AT3G23530_	.	+	15.42	13	1.18601
chr5	23521049	23523797	AT5G58130_ROS3	.	-	57.71	48.66	1.18595
chr5	105325	107405	AT5G01260_	.	+	88.84	74.91	1.18593
chr1	8333020	8336385	AT1G23480_ATCSLA03,ATCSLA3,CSLA03,CSLA03,CSLA3	.	+	16.32	13.76	1.18591
chr1	10099425	10099496	AT1G28870_	.	+	31.25	26.35	1.18589
chr2	13809216	13813570	AT2G32530_ATCSLB03,ATCSLB3,CSLB03	.	+	18.62	15.7	1.18587
chr2	17156029	17158880	AT2G41160_	.	-	48.87	41.21	1.18583
chr3	2229590	2232361	AT3G07050_NSN1	.	-	57.32	48.34	1.18573
chr4	13384062	13388290	AT4G26510_UKL4	.	+	45.52	38.39	1.18568
chr4	15101295	15102684	AT4G30996_NKS1	.	+	68.76	58	1.18549
chr5	21079252	21081578	AT5G51850_TRM24	.	+	21.34	18	1.18545
chr3	17925702	17928188	AT3G48410_	.	-	33.68	28.41	1.18543
chr3	4136488	4136828	AT3G12960_SMP1	.	+	29.5	24.89	1.18514
chr5	16477360	16478436	AT5G41160_ATPUP12,PUP12	.	+	18.81	15.87	1.18514
chr5	876521	878364	AT5G03500_	.	-	54.99	46.4	1.18509
chr3	481898	484147	AT3G02360_	.	+	63.47	53.56	1.18499
chr5	25072468	25073991	AT5G62440_	.	-	84.72	71.5	1.18487
chr5	848864	853142	AT5G03430_	.	-	61.99	52.32	1.18479
chr5	8113795	8116615	AT5G24010_	.	+	46.18	38.98	1.18466
chr1	17152934	17154843	AT1G45233_AtTHO5,THO5	.	+	61.98	52.33	1.18437
chr2	12852372	12857617	AT2G30110_ATUBA1,MOS5,UBA1	.	-	68.6	57.92	1.18436
chr1	16398099	16399878	AT1G43560_Aty2,ty2	.	-	68.86	58.14	1.18435
chr5	3718810	3721334	AT5G11580_	.	+	62.25	52.56	1.18433
chr2	10480532	10482795	AT2G24645_	.	-	24.92	21.04	1.18432
chr5	8863363	8865677	AT5G25460_DGR2	.	+	18.82	15.89	1.18428
chr5	2759317	2761875	AT5G08530_CI51	.	-	65.68	55.46	1.18424
chr1	13208736	13210418	AT1G35680_RPL21C	.	+	85.6	72.29	1.18409
chr1	10846513	10850628	AT1G30610_EMB2279,EMB88	.	+	47.53	40.14	1.18406
chr4	16471835	16477021	AT4G34450_	.	+	61.3	51.77	1.18405
chr4	15221843	15223627	AT4G31360_	.	+	56.43	47.66	1.18397
chr3	8287950	8288388	AT3G23220_ESE1	.	+	25.99	21.95	1.18397
chr5	7627597	7630993	AT5G22830_ATMGT10,GMN10,MGT10,MGT10,MRS2-11	.	+	64.99	54.89	1.18397
chr1	6244298	6247812	AT1G18150_ATMPK8,MPK8	.	-	55.53	46.9	1.18397
chr3	19182484	19183996	AT3G51710_	.	+	21.81	18.42	1.18394
chr5	4283356	4286295	AT5G13360_	.	+	47.07	39.76	1.18381
chr4	9871789	9873398	AT4G17760_	.	+	31.68	26.76	1.18379
chr2	10684135	10686085	AT2G25110_AtSDF2,ATSDL,SDF2	.	+	79.26	66.96	1.18366
chr4	17194588	17197131	AT4G36390_	.	-	71.88	60.73	1.18357
chr2	11748015	11750182	AT2G27490_ATCOAE	.	-	65.4	55.26	1.18346
chr4	14811262	14812821	AT4G30250_	.	-	25.41	21.47	1.18343
chr3	21544097	21546180	AT3G58180_	.	+	67.05	56.66	1.18334
chr4	18154395	18159936	AT4G38950_	.	-	33.62	28.41	1.18332
chr3	1492142	1493619	AT3G05230_	.	+	63.32	53.51	1.1833
chr2	9068318	9070431	AT2G21160_	.	+	76.37	64.54	1.18327
chr5	19216312	19217909	AT5G47370_HAT2	.	-	24.01	20.29	1.18325
chr4	14288439	14290706	AT4G28980_CAK1AT,CDKF;1	.	+	78.84	66.63	1.18322
chr1	1697587	1701025	AT1G05670_	.	-	41.98	35.48	1.18315
chr4	13604558	13606448	AT4G27130_	.	-	69.13	58.43	1.18309
chr5	20886838	20890907	AT5G51430_EYE	.	-	60.81	51.4	1.18304
chr1	10090368	10090439	AT1G28740_	.	+	30.63	25.89	1.18301
chr3	3960401	3961915	AT3G12490_ATCYS6,ATCYSB,CYSB	.	-	86.26	72.92	1.18292
chr1	18622026	18624250	AT1G50270_	.	+	56.21	47.52	1.18283
chr1	24236258	24240705	AT1G65260_PTAC4,VIPP1	.	+	65.56	55.43	1.18272
chr2	7159629	7160892	AT2G16510_	.	-	110.32	93.28	1.18266
chr2	15127265	15127816	AT2G36026_	.	+	32.19	27.22	1.18252
chr1	8412051	8414879	AT1G23800_ALDH2B,ALDH2B7	.	-	16.32	13.8	1.18248
chr4	8256086	8260787	AT4G14350_	.	-	59.62	50.42	1.18243
chr3	17624479	17629013	AT3G47780_ABCA7,ATATH6,ATH6	.	+	16.39	13.86	1.18241
chr5	3124568	3125076	AT5G09990_PROPEP5	.	+	31.51	26.65	1.1823
chr2	13659006	13660764	AT2G32150_	.	+	10.44	8.83	1.18213
chr2	1798155	1799102	AT2G05060_	.	+	22.26	18.83	1.18206
chr4	2394458	2397759	AT4G04720_AtCPK21,CPK21	.	-	64.1	54.23	1.18197
chr5	23314716	23318125	AT5G57580_	.	-	59.37	50.24	1.18169
chr1	2049602	2052154	AT1G06690_	.	-	62.3	52.72	1.18168
chr3	2534887	2538372	AT3G07960_PIP5K6	.	+	23.34	19.75	1.18168
chr5	16802280	16805013	AT5G42010_	.	+	20.48	17.33	1.18166
chr4	15897198	15897428	AT4G32924_	.	-	15.41	13.04	1.18161
chr3	21780785	21783663	AT3G58940_	.	-	45.55	38.55	1.18154
chr4	14535542	14537250	AT4G29670_ACHT2	.	-	87.35	73.93	1.1815
chr3	19798107	19800136	AT3G53400_	.	+	87.42	73.99	1.18149
chr3	19798107	19800136	AT3G53402_CPuORF46	.	+	87.42	73.99	1.18149
chr2	648044	650814	AT2G02450_ANAC034,ANAC035,AtLOV1,LOV1,NAC035	.	+	24.47	20.71	1.18147
chr5	1840829	1843872	AT5G06110_	.	-	54.16	45.84	1.18146
chr1	6488655	6488735	AT1G18820_	.	+	6.7	5.67	1.18134
chr3	8679552	8680824	AT3G24030_	.	-	108.67	91.99	1.1813
chr1	24946928	24955611	AT1G66880_	.	+	27.23	23.05	1.18127
chr1	18649747	18657376	AT1G50360_ATVIIIA,VIIIA	.	+	31.43	26.61	1.18107
chr4	18139295	18141983	AT4G38900_	.	-	51.72	43.79	1.18105
chr1	19333159	19336115	AT1G52000_	.	-	20.28	17.17	1.18102
chr5	6791487	6793346	AT5G20110_	.	-	15.98	13.53	1.18095
chr2	18729733	18729843	AT2G45434_	.	+	22.19	18.79	1.18085
chr3	7838784	7839467	AT3G22210_	.	-	16.32	13.82	1.18077
chr4	12080060	12084256	AT4G23050_	.	+	49.97	42.32	1.18072
chr1	23791585	23795563	AT1G64100_	.	+	23.53	19.93	1.18054
chr5	192990	194231	AT5G01480_	.	+	16.94	14.35	1.18036
chr5	25330189	25330844	AT5G63150_	.	+	111.97	94.86	1.18035
chr4	12479752	12483993	AT4G24020_NLP7	.	+	52.88	44.8	1.18032
chr5	18950917	18952629	AT5G46700_TET1,TRN2	.	+	19.05	16.14	1.18019
chr5	22974520	22975992	AT5G56810_	.	+	23.18	19.64	1.18015
chr4	7256538	7261180	AT4G12120_ATSEC1B,SEC1B	.	-	27.58	23.37	1.18007
chr2	6833880	6836434	AT2G15695_	.	-	74.44	63.09	1.17987
chr2	16583073	16586252	AT2G39760_ATBPM3,BPM3	.	+	73.43	62.24	1.17976
chr3	6328115	6330794	AT3G18440_ALMT9,AtALMT9	.	+	36.97	31.34	1.17959
chr4	18229331	18232071	AT4G39140_	.	-	68.32	57.92	1.17953
chr5	25955381	25958995	AT5G64960_CDKC2,CDKC;2	.	+	46.78	39.66	1.17948
chr5	866449	869024	AT5G03470_ATB'	.	+	61.2	51.89	1.17938
chr1	4319886	4322945	AT1G12680_PEPKR2	.	-	69.56	58.98	1.17935
chr1	10727638	10738055	AT1G30400_ABCC1,ATABCC1,ATMRP1,EST1,MRP1	.	+	64.44	54.64	1.17932
chr5	22383560	22384925	AT5G55160_ATSUMO2,SUM2,SUMO,SUMO2	.	-	77.2	65.47	1.17914
chr2	17651253	17652588	AT2G42390_	.	-	80.66	68.41	1.17904
chr1	1191608	1193884	AT1G04420_	.	+	68.8	58.36	1.17886
chr5	5337974	5342432	AT5G16300_	.	+	59.78	50.71	1.17882
chr5	17459175	17459247	AT5G43455_	.	-	6.78	5.75	1.17882
chr1	3055231	3057443	AT1G09470_	.	-	16.01	13.58	1.17881
chr4	14672832	14674144	AT4G30010_	.	+	92.03	78.08	1.17864
chr1	2805371	2808621	AT1G08760_	.	+	43.8	37.16	1.17864
chr4	16574577	16576671	AT4G34740_ASE2,ATASE2,ATPURF2,CIA1,DOV1	.	-	93.83	79.61	1.1786
chr3	8194679	8197153	AT3G23050_AXR2,IAA7	.	+	18.14	15.39	1.17857
chr1	2274943	2275758	AT1G07400_	.	+	32.27	27.38	1.17853
chr2	7303919	7306671	AT2G16860_	.	-	65.02	55.17	1.17851
chr2	1334512	1336489	AT2G04040_ATDTX1,DTX1,TX1	.	-	16.96	14.39	1.17847
chr5	4468508	4471466	AT5G13840_CCS52B,FZR3	.	-	30.91	26.23	1.17835
chr5	8277700	8279240	AT5G24314_PDE225,PTAC7,TAC7	.	+	67.35	57.16	1.17824
chr1	13669441	13671156	AT1G36310_	.	+	69.58	59.06	1.17809
chr2	17800444	17802816	AT2G42780_	.	+	53.38	45.31	1.17807
chr4	13902635	13902978	AT4G27930_	.	-	21.83	18.53	1.17799
chr3	3886992	3891000	AT3G12200_AtNek7,Nek7	.	-	43.22	36.69	1.17793
chr4	901176	901247	AT4G02055_	.	+	6.68	5.67	1.17782
chr1	7886542	7889534	AT1G22330_	.	+	17.82	15.13	1.17768
chr5	6737523	6739390	AT5G19930_	.	-	51.98	44.14	1.17758
chr5	5764063	5766077	AT5G17490_AtRGL3,RGL3	.	-	26.98	22.91	1.17757
chr5	974498	979849	AT5G03730_AtCTR1,CTR1,SIS1	.	-	61.73	52.42	1.17757
chr2	14352191	14352262	AT2G33910_	.	+	9.74	8.27	1.17754
chr2	15339122	15343086	AT2G36580_	.	+	57.17	48.55	1.17751
chr3	9513696	9516869	AT3G26020_	.	+	56.15	47.69	1.17736
chr1	19981969	19982124	AT1G53543_	.	+	24.7	20.98	1.17723
chr4	1046204	1046997	AT4G02380_AtLEA5,SAG21	.	-	25.04	21.27	1.17716
chr5	3676548	3679352	AT5G11500_	.	+	78.51	66.7	1.17703
chr5	16468434	16472810	AT5G41140_	.	+	28.12	23.89	1.17699
chr5	23122540	23124513	AT5G57120_	.	-	74.81	63.56	1.17697
chr3	18331539	18335041	AT3G49430_At-SR34a,SR34a,SRp34a	.	+	60.8	51.66	1.17689
chr2	4891642	4893345	AT2G12190_	.	-	16.69	14.18	1.17689
chr2	1705148	1706465	AT2G04852_	.	-	19.16	16.28	1.1768
chr5	23874411	23875695	AT5G59140_	.	-	74.16	63.02	1.17674
chr5	19235631	19241256	AT5G47430_	.	-	55.14	46.86	1.17666
chr4	15363778	15364349	AT4G31740_	.	+	16.85	14.32	1.17655
chr5	4691006	4694055	AT5G14550_	.	-	54.26	46.12	1.17646
chr3	18873958	18874780	AT3G50770_CML41	.	+	24.86	21.13	1.17644
chr4	8422231	8424760	AT4G14700_ATORC1A,ORC1A	.	+	19.46	16.54	1.17644
chr5	1379068	1382419	AT5G04770_ATCAT6,CAT6	.	+	20.87	17.74	1.17634
chr1	295221	295859	AT1G01810_	.	+	27.01	22.96	1.17632
chr1	1687436	1689501	AT1G05640_	.	-	31.89	27.11	1.17625
chr5	6679306	6682001	AT5G19760_	.	-	73.68	62.64	1.17622
chr5	26918793	26919949	AT5G67450_AZF1,ZF1	.	-	29.7	25.25	1.17617
chr5	26799766	26802067	AT5G67170_	.	+	56.61	48.13	1.17615
chr4	424717	424788	AT4G00985_	.	-	33.06	28.11	1.17603
chr5	15694307	15695042	AT5G39200_	.	-	3.13	2.66	1.17603
chr1	5051760	5055252	AT1G14690_MAP65-7	.	-	52.25	44.43	1.17597
chr2	8527231	8528533	AT2G19790_	.	+	76.18	64.78	1.17595
chr1	20594559	20596034	AT1G55205_	.	+	52.28	44.46	1.17585
chr1	27032456	27034895	AT1G71870_	.	-	21.66	18.42	1.1758
chr3	20890250	20892002	AT3G56330_	.	+	48.62	41.35	1.17577
chr5	22907319	22909559	AT5G56590_	.	+	54.71	46.53	1.17576
chr5	2657151	2661416	AT5G08260_scpl35	.	+	17.52	14.9	1.17572
chr1	9295736	9298541	AT1G26830_ATCUL3,ATCUL3A,CUL3,CUL3A	.	+	63.22	53.77	1.17572
chr3	20932791	20934540	AT3G56460_	.	-	90.29	76.8	1.17563
chr1	6751673	6753999	AT1G19490_	.	-	62.08	52.81	1.1755
chr4	15812095	15814987	AT4G32790_	.	+	50.97	43.36	1.17547
chr1	4929123	4930904	AT1G14410_ATWHY1,PTAC1,WHY1	.	-	48.64	41.38	1.1754
chr5	6787002	6788654	AT5G20090_	.	-	59.57	50.68	1.17538
chr5	26584774	26587869	AT5G66610_DAR7	.	+	25.93	22.06	1.17535
chr1	18687785	18690371	AT1G50450_	.	-	64.21	54.63	1.17533
chr5	21401144	21401215	AT5G52815_	.	+	7.23	6.15	1.17532
chr2	18490129	18492816	AT2G44830_	.	+	30.25	25.74	1.17515
chr1	23881512	23883297	AT1G64350_SEH1H	.	+	71.12	60.52	1.17512
chr4	14768936	14769648	AT4G30180_	.	+	23.75	20.21	1.17507
chr5	2780512	2783066	AT5G08580_	.	-	44.1	37.53	1.17501
chr1	28906523	28911564	AT1G76950_PRAF1	.	+	47.15	40.13	1.17489
chr1	3366493	3369095	AT1G10280_	.	-	66.23	56.37	1.17488
chr1	25769576	25772543	AT1G68640_PAN,TGA8	.	-	14.78	12.58	1.17474
chr5	7950202	7952532	AT5G23580_ATCDPK9,ATCPK12,CDPK9,CPK12	.	-	50.75	43.2	1.17473
chr5	25518641	25523621	AT5G63770_ATDGK2,DGK2	.	+	47.21	40.19	1.17463
chr3	8480025	8482157	AT3G23620_	.	+	65.23	55.54	1.17444
chr4	12819511	12820736	AT4G24920_	.	-	75.23	64.07	1.17416
chr2	18138307	18140988	AT2G43790_ATMAPK6,ATMPK6,MAPK6,MPK6	.	+	63.03	53.68	1.17415
chr4	18189012	18190556	AT4G39040_	.	-	82.33	70.12	1.17411
chr2	14018690	14021183	AT2G33040_ATP3	.	-	69.2	58.94	1.17405
chr1	2379647	2381362	AT1G07700_	.	+	72.86	62.06	1.174
chr1	9527574	9528878	AT1G27435_	.	-	60.13	51.22	1.17392
chr1	3431185	3431256	AT1G10440_	.	-	7.01	5.97	1.17391
chr2	2588545	2590453	AT2G06530_VPS2.1	.	-	70.75	60.27	1.17386
chr5	23080661	23083988	AT5G57035_	.	+	53.02	45.17	1.17375
chr2	11819829	11821878	AT2G27730_	.	-	82.63	70.4	1.1737
chr4	2445794	2447086	AT4G04830_ATMSRB5,MSRB5	.	+	16.21	13.81	1.17366
chr4	15205480	15209601	AT4G31340_	.	+	53.67	45.73	1.17359
chr5	6330379	6333071	AT5G18960_FRS12	.	+	55.1	46.95	1.17355
chr1	30007326	30011393	AT1G79750_ATNADP-ME4,NADP-ME4	.	-	63.42	54.04	1.17354
chr2	9152006	9156878	AT2G21390_	.	+	55.15	47	1.17337
chr1	25042135	25044647	AT1G67070_DIN9,PMI2	.	+	19.28	16.43	1.17336
chr1	19831441	19832895	AT1G53180_	.	+	19.43	16.56	1.1732
chr5	10783983	10785722	AT5G28750_	.	-	79.74	67.97	1.17314
chr1	21136944	21138087	AT1G56430_ATNAS4,NAS4	.	+	23.64	20.15	1.17312
chr3	723878	727502	AT3G03140_	.	+	63.08	53.77	1.17311
chr2	14524756	14525763	AT2G34430_LHB1B1,LHCB1.4	.	+	18.9	16.11	1.17308
chr2	211970	214472	AT2G01470_ATSEC12,STL2P	.	-	74.63	63.62	1.17303
chr5	21746035	21748595	AT5G53530_VPS26A	.	-	53.92	45.97	1.1729
chr3	2526618	2528633	AT3G07930_	.	+	54.55	46.51	1.17283
chr1	22637728	22641825	AT1G61360_	.	-	19.74	16.83	1.1728
chr5	13336475	13336657	AT5G35069_	.	+	10.58	9.02	1.17276
chr3	21648593	21649390	AT3G58540_	.	+	25.46	21.71	1.17265
chr3	20018656	20020926	AT3G54060_	.	-	16.93	14.44	1.17232
chr1	20048586	20050115	AT1G53700_PK3AT,WAG1	.	+	28.03	23.91	1.17224
chr3	201920	202740	AT3G01513_	.	-	22.67	19.34	1.17209
chr2	7085784	7089157	AT2G16380_	.	+	18.11	15.45	1.17206
chr3	21225540	21226692	AT3G57360_	.	+	44.95	38.35	1.17205
chr5	25346729	25348386	AT5G63195_	.	-	32.49	27.72	1.17202
chr3	1008995	1010480	AT3G03920_	.	-	56.98	48.62	1.17191
chr1	5556989	5559520	AT1G16250_	.	+	80.79	68.95	1.17169
chr3	5466246	5468774	AT3G16130_ATROPGEF13,PIRF2,ROPGEF13	.	+	22.79	19.45	1.17163
chr5	9605650	9609787	AT5G27270_EMB976	.	+	52.29	44.63	1.17159
chr2	937420	940339	AT2G03120_ATSPP,SPP	.	+	60.83	51.92	1.17158
chr3	9972508	9974225	AT3G27030_	.	-	18.29	15.61	1.17157
chr5	17806472	17807534	AT5G44210_ATERF-9,ATERF9,ERF9	.	+	21.37	18.24	1.17151
chr3	149999	151539	AT3G01390_AVMA10,VMA10	.	-	76.16	65.01	1.17149
chr4	17634784	17636288	AT4G37530_	.	+	17.62	15.04	1.17143
chr1	18582024	18583724	AT1G50170_ATSIRB,SIRB	.	+	68.73	58.68	1.17124
chr2	10499551	10503140	AT2G24690_	.	-	44.11	37.66	1.17122
chr1	3961348	3961464	AT1G11735_MIR171B	.	-	23.46	20.03	1.17116
chr1	9273857	9275312	AT1G26790_	.	-	22.44	19.16	1.1711
chr1	4638514	4642104	AT1G13560_AAPT1,ATAAPT1	.	-	54.44	46.49	1.17097
chr1	23941598	23942846	AT1G64450_	.	-	24.86	21.23	1.1709
chr1	26348721	26350697	AT1G69960_PP2A	.	-	74.76	63.85	1.17084
chr5	2873660	2874849	AT5G09240_	.	-	19.4	16.57	1.17069
chr1	6431938	6433464	AT1G18680_	.	-	54.53	46.58	1.17064
chr3	7845823	7846605	AT3G22231_PCC1	.	-	7.4	6.32	1.17062
chr1	24431430	24432953	AT1G65690_	.	-	18.8	16.06	1.1705
chr1	5457084	5458429	AT1G15870_	.	+	23.82	20.35	1.17043
chr1	7313946	7319574	AT1G20970_	.	+	39.15	33.45	1.17035
chr3	17148342	17149589	AT3G46580_ATMBD5,MBD05,MBD5	.	+	62.31	53.24	1.17033
chr5	5962897	5963405	AT5G18010_SAUR19	.	-	11.61	9.92	1.17019
chr5	17196795	17197163	AT5G42895_	.	+	20.83	17.8	1.17013
chr1	28947743	28951599	AT1G77030_	.	-	49.86	42.61	1.17011
chr5	5038751	5040840	AT5G15530_BCCP2,CAC1-B	.	+	20.23	17.29	1.16994
chr5	16820284	16824757	AT5G42080_ADL1,ADL1A,AG68,DL1,DRP1A,RSW9	.	-	53.29	45.55	1.16989
chr1	3302742	3304092	AT1G10110_	.	+	24.58	21.01	1.16984
chr1	3740765	3744675	AT1G11170_	.	+	16.39	14.01	1.16976
chr1	22192773	22195400	AT1G60170_emb1220	.	+	52.03	44.48	1.1697
chr5	26718232	26721256	AT5G66910_	.	-	58.58	50.08	1.16969
chr1	27891494	27896355	AT1G74170_AtRLP13,RLP13	.	-	37.29	31.88	1.16965
chr1	5124742	5126151	AT1G14860_atnudt18,NUDT18	.	+	17.23	14.73	1.16961
chr3	10061545	10062731	AT3G27250_	.	+	29.97	25.63	1.16927
chr5	23439498	23443781	AT5G57870_eIFiso4G1	.	+	60.86	52.05	1.16923
chr2	13194185	13200128	AT2G31010_	.	+	27.98	23.93	1.16917
chr1	2769815	2771477	AT1G08700_PS1	.	-	99.35	84.98	1.16908
chr5	19226790	19228858	AT5G47390_MYBH	.	+	88.29	75.52	1.16907
chr5	573054	573558	AT5G02550_	.	-	19.63	16.79	1.16905
chr4	16997139	17000833	AT4G35890_AtLARP1c,LARP1c	.	+	77.25	66.08	1.16901
chr1	276266	278448	AT1G01760_AtTAD1,TAD1	.	-	26.14	22.36	1.16898
chr3	194724	198019	AT3G01500_ATBCA1,ATSABP3,CA1,SABP3	.	-	17.08	14.61	1.16895
chr5	24207689	24211743	AT5G60120_TOE2	.	+	61.1	52.27	1.1689
chr2	14377734	14382494	AT2G34040_	.	-	58.89	50.38	1.16888
chr2	13401132	13404222	AT2G31450_ATNTH1	.	-	47.04	40.25	1.16865
chr1	30350539	30352208	AT1G80760_NIP6,NIP6;1,NLM7	.	-	18.98	16.24	1.16862
chr3	3000759	3003179	AT3G09780_ATCRR1,CCR1	.	-	21.34	18.26	1.16858
chr2	12094746	12099644	AT2G28320_	.	+	57.88	49.53	1.16855
chr5	6975104	6975993	AT5G20630_ATGER3,GER3,GLP3,GLP3A,GLP3B	.	-	29.11	24.91	1.16854
chr1	3938501	3940754	AT1G11680_CYP51,CYP51A2,CYP51G1,EMB1738	.	+	67.72	57.96	1.16836
chr5	22684405	22686369	AT5G56020_	.	+	71.5	61.2	1.16827
chr1	9720736	9724714	AT1G27910_ATPUB45,PUB45	.	-	53.18	45.52	1.16824
chr1	17090807	17091338	AT1G45165_	.	+	11.66	9.98	1.16817
chr4	11265651	11267049	AT4G21105_	.	+	74.5	63.78	1.16805
chr1	10587602	10589760	AT1G30130_	.	+	65.26	55.87	1.16804
chr1	6356131	6360192	AT1G18470_	.	-	56.86	48.68	1.168
chr2	14183552	14187869	AT2G33490_	.	+	57.84	49.52	1.16798
chr3	2120324	2124131	AT3G06720_AIMP,AT-IMP,ATKAP,IMPA-1,IMPA1	.	+	55.28	47.33	1.16793
chr2	16138570	16142588	AT2G38580_	.	+	29.34	25.12	1.16793
chr3	16070982	16071256	AT3G44440_	.	+	15.71	13.45	1.1679
chr5	26861727	26863897	AT5G67330_ATNRAMP4,NRAMP4	.	+	70.8	60.62	1.1679
chr1	4260783	4261869	AT1G12490_	.	+	15.23	13.04	1.16782
chr1	9373926	9376720	AT1G27000_	.	+	68.84	58.95	1.16774
chr2	10180998	10181211	AT2G23920_	.	+	16.49	14.12	1.16773
chr1	28070295	28074148	AT1G74710_ATICS1,EDS16,ICS1,SID2	.	+	26.1	22.35	1.16771
chr1	4039711	4043880	AT1G11960_	.	-	36.56	31.31	1.16762
chr4	6713557	6718555	AT4G10955_	.	-	26.47	22.67	1.16755
chr5	1777547	1779826	AT5G05920_DHS,EDA22	.	-	58.05	49.72	1.1675
chr3	9521782	9524552	AT3G26050_	.	+	22.38	19.17	1.16736
chr1	25247988	25250734	AT1G67400_	.	-	17.22	14.75	1.16734
chr4	8450289	8454028	AT4G14740_	.	-	21.13	18.1	1.16731
chr5	25975697	25976305	AT5G65030_	.	-	25.19	21.58	1.16721
chr5	23645535	23646083	AT5G58500_LSH5	.	-	32.87	28.16	1.1672
chr4	15188748	15191217	AT4G31300_PBA1	.	+	83	71.11	1.16718
chr5	18795926	18800094	AT5G46340_RWA1	.	-	44.82	38.4	1.16714
chr1	11140549	11142630	AT1G31175_	.	+	62.89	53.89	1.16698
chr1	24172899	24176310	AT1G65070_	.	-	59.29	50.82	1.16663
chr5	1372147	1373619	AT5G04750_	.	+	79.85	68.45	1.16652
chr4	13772819	13777290	AT4G27595_	.	-	18.49	15.85	1.16646
chr1	9963593	9966320	AT1G28380_NSL1	.	+	56.85	48.74	1.16636
chr1	6213725	6218340	AT1G18070_	.	-	60.99	52.29	1.16635
chr1	18681932	18685652	AT1G50430_7RED,DWF5,LE,PA,ST7R	.	-	66.25	56.8	1.16634
chr4	6136249	6139711	AT4G09730_RH39	.	+	62.82	53.86	1.16633
chr2	11977944	11979837	AT2G28110_FRA8,IRX7	.	-	23.56	20.2	1.16625
chr1	16654030	16655928	AT1G43900_	.	+	60.46	51.84	1.16625
chr2	16033448	16038876	AT2G38280_ATAMPD,FAC1	.	-	55.54	47.63	1.16604
chr5	18718475	18721375	AT5G46180_DELTA-OAT	.	-	49.51	42.46	1.166
chr4	18399955	18402963	AT4G39640_GGT1	.	+	16.29	13.97	1.16595
chr3	20622620	20624002	AT3G55605_	.	+	62.33	53.46	1.16589
chr5	25297709	25297900	AT5G63065_	.	+	20.39	17.49	1.16571
chr3	17191668	17195280	AT3G46668_	.	+	46.15	39.59	1.16566
chr5	242550	244111	AT5G01650_	.	-	80.55	69.11	1.16551
chr2	151057	151729	AT2G01300_	.	-	21.83	18.73	1.16542
chr4	1611752	1612756	AT4G03635_	.	+	95.13	81.63	1.16536
chr3	259639	261840	AT3G01710_	.	-	15.87	13.62	1.16508
chr4	16946521	16950594	AT4G35780_STY17	.	-	63.23	54.27	1.16507
chr1	28944843	28947031	AT1G77020_	.	-	15.66	13.44	1.16506
chr5	26219258	26221028	AT5G65610_	.	+	20.25	17.38	1.16504
chr4	16888405	16890877	AT4G35580_CBNAC,NTL9	.	-	73.85	63.39	1.16498
chr3	5138686	5142644	AT3G15260_	.	+	46.04	39.52	1.16494
chr5	1757098	1760666	AT5G05840_	.	-	19.42	16.67	1.16487
chr3	2991655	2992679	AT3G09750_	.	-	20.06	17.22	1.16483
chr1	5590951	5593007	AT1G16350_	.	+	71.52	61.4	1.16479
chr4	13255251	13256760	AT4G26160_ACHT1	.	+	56.55	48.55	1.16474
chr4	14246283	14249544	AT4G28860_ckl4	.	+	64.55	55.42	1.16471
chr1	2675813	2679781	AT1G08465_YAB2	.	+	16.4	14.08	1.16466
chr1	4779523	4782542	AT1G13970_	.	-	15.27	13.11	1.16463
chr2	17029701	17029899	AT2G40805_MIR319C	.	+	15.98	13.72	1.1646
chr3	19713928	19717595	AT3G53190_	.	+	15.91	13.66	1.16459
chr5	19297817	19299152	AT5G47590_	.	-	25.75	22.11	1.16456
chr4	14321813	14323307	AT4G29070_	.	+	85.5	73.42	1.16451
chr3	4849788	4851601	AT3G14450_CID9	.	+	18.69	16.05	1.16438
chr3	9208937	9210599	AT3G25290_	.	+	16.78	14.41	1.16436
chr1	2394801	2397272	AT1G07725_ATEXO70H6,EXO70H6	.	-	71.47	61.39	1.16417
chr5	15246910	15247329	AT5G38195_	.	+	19.39	16.66	1.16377
chr5	26855216	26856941	AT5G67310_CYP81G1	.	-	20.75	17.83	1.16368
chr3	7448040	7452000	AT3G21230_4CL5	.	-	18.05	15.51	1.16366
chr1	20071311	20073758	AT1G53770_	.	-	56.59	48.63	1.16365
chr5	17622336	17624329	AT5G43830_	.	-	68.03	58.47	1.16347
chr3	2400793	2404280	AT3G07530_	.	+	30.11	25.88	1.16338
chr4	16618573	16625057	AT4G34890_ATXDH1,XDH1	.	-	39.02	33.54	1.16334
chr3	20438772	20440429	AT3G55140_	.	+	74.89	64.38	1.16322
chr2	16210857	16214232	AT2G38780_	.	+	61.58	52.94	1.16317
chr5	19832872	19834934	AT5G48910_LPA66	.	-	75.13	64.59	1.16316
chr3	17905725	17907561	AT3G48350_CEP3	.	+	15.39	13.23	1.16314
chr2	9227209	9230189	AT2G21550_	.	+	15.4	13.24	1.16302
chr2	268818	272610	AT2G01600_	.	+	69.08	59.4	1.16294
chr5	25418594	25422184	AT5G63490_	.	-	53.96	46.4	1.1629
chr4	17504564	17506367	AT4G37180_	.	+	21.34	18.35	1.16285
chr2	6187421	6190380	AT2G14530_TBL13	.	+	64.99	55.89	1.16279
chr2	847176	849598	AT2G02910_	.	-	50.8	43.69	1.1627
chr2	13182069	13185949	AT2G30980_ASKdZeta,ATSK2-2,ATSK23,BIL1,SKdZeta	.	-	52.09	44.8	1.16269
chr5	6325786	6328354	AT5G18940_	.	+	53.68	46.17	1.16262
chr4	14854811	14858003	AT4G30360_ATCNGC17,CNGC17	.	-	51.97	44.7	1.1626
chr3	2966375	2968972	AT3G09670_	.	+	46.54	40.03	1.16259
chr5	4756218	4757657	AT5G14730_	.	+	23.24	19.99	1.1625
chr1	26507114	26508285	AT1G70350_	.	-	67.51	58.08	1.16233
chr5	5344502	5346019	AT5G16320_FRL1	.	+	79.99	68.82	1.16228
chr1	4396348	4398193	AT1G12920_ERF1-2	.	-	95.15	81.87	1.16219
chr1	28802925	28804784	AT1G76730_COG0212	.	-	84.03	72.31	1.16206
chr3	1186484	1189478	AT3G04460_APM4,ATPEX12,PEX12	.	+	63.02	54.23	1.16206
chr3	16969266	16971204	AT3G46200_aTNUDT9,NUDT9	.	+	40.29	34.67	1.16205
chr1	7185658	7192794	AT1G20720_	.	-	21.01	18.08	1.16197
chr3	20028124	20029986	AT3G54090_FLN1	.	+	58.51	50.36	1.1618
chr5	1624206	1629269	AT5G05490_AtREC8,DIF1,REC8,SYN1	.	+	16.65	14.33	1.16179
chr1	22026507	22029379	AT1G59840_CCB4	.	+	51.91	44.68	1.16178
chr1	3596360	3597847	AT1G10790_	.	+	28.07	24.16	1.16177
chr1	30109147	30111280	AT1G80040_	.	-	96.23	82.83	1.16176
chr1	7406296	7407764	AT1G21150_	.	-	21.91	18.86	1.16163
chr2	8376202	8377343	AT2G19350_	.	+	100.55	86.56	1.1616
chr1	27469534	27473554	AT1G73020_	.	-	31.91	27.47	1.16157
chr5	20100579	20104447	AT5G49530_	.	+	46.72	40.22	1.16157
chr5	9491072	9493920	AT5G26990_	.	+	64.44	55.48	1.16147
chr3	627512	629845	AT3G02870_VTC4	.	-	45.89	39.51	1.16144
chr5	8068452	8072991	AT5G23910_	.	+	24.67	21.24	1.16141
chr5	18501486	18504117	AT5G45620_	.	+	68.47	58.96	1.16127
chr1	1916430	1917585	AT1G06260_	.	+	33.33	28.7	1.16127
chr5	5134527	5137626	AT5G15740_	.	-	45.45	39.14	1.16117
chr2	15860633	15861618	AT2G37880_	.	+	24.99	21.52	1.16117
chr1	6421117	6425880	AT1G18660_	.	+	63.8	54.95	1.16103
chr5	4898737	4900581	AT5G15120_	.	+	16.95	14.6	1.16085
chr1	27017801	27018315	AT1G71828_	.	-	20.93	18.03	1.16075
chr3	4361857	4364262	AT3G13410_	.	-	69.89	60.21	1.16074
chr1	11265880	11271701	AT1G31480_SGR2	.	+	49.35	42.52	1.16059
chr5	7406097	7408702	AT5G22370_EMB1705,QQT1	.	+	47.37	40.82	1.16042
chr2	19368798	19370441	AT2G47180_AtGolS1,GolS1	.	-	21.12	18.2	1.16035
chr5	4547202	4549417	AT5G14090_AtLAZY1,LAZY1	.	+	35.31	30.43	1.16032
chr1	17796764	17798337	AT1G48200_	.	-	69.34	59.76	1.16028
chr4	5163399	5167179	AT4G08170_	.	-	53.35	45.98	1.16025
chr3	4330772	4330843	AT3G13335_	.	+	7.74	6.67	1.16018
chr5	19938576	19939571	AT5G49170_	.	-	20.72	17.86	1.16004
chr5	8323895	8326705	AT5G24380_ATYSL2,YSL2	.	+	15.43	13.3	1.16003
chr1	12977668	12979910	AT1G35340_	.	+	73.66	63.5	1.15997
chr5	21399331	21400603	AT5G52810_	.	+	40.96	35.31	1.15997
chr4	5187785	5189644	AT4G08230_	.	-	60.98	52.57	1.15995
chr4	18439138	18439578	AT4G39750_	.	+	16.96	14.62	1.15995
chr2	19689409	19696821	AT2G48160_	.	-	62.54	53.92	1.15984
chr5	26864556	26867602	AT5G67340_	.	+	25.77	22.22	1.15969
chr4	16336387	16340098	AT4G34110_ATPAB2,PAB2,PABP2	.	+	72.33	62.37	1.15967
chr5	22904689	22906661	AT5G56580_ANQ1,ATMKK6,MKK6	.	-	21.64	18.66	1.15961
chr5	2046810	2047794	AT5G06660_	.	+	115.01	99.2	1.15936
chr2	15805715	15810552	AT2G37690_	.	+	42.19	36.39	1.15934
chr1	23599413	23602902	AT1G63650_AtEGL3,ATMYC-2,EGL1,EGL3	.	+	17.53	15.12	1.15929
chr4	973924	976129	AT4G02210_	.	-	59.83	51.61	1.15924
chr5	25616638	25618631	AT5G64000_ATSAL2,SAL2	.	+	27.89	24.06	1.15912
chr3	19446970	19447872	AT3G52460_	.	+	21.99	18.97	1.15911
chr5	5658460	5659386	AT5G17220_ATGSTF12,GST26,GSTF12,TT19	.	+	17.11	14.76	1.15911
chr4	15054873	15056826	AT4G30940_	.	+	63.41	54.71	1.15899
chr5	4615318	4617615	AT5G14310_AtCXE16,CXE16	.	+	99.41	85.78	1.15888
chr2	15756722	15758279	AT2G37555_	.	+	84.74	73.13	1.15874
chr1	5875350	5876545	AT1G17190_ATGSTU26,GSTU26	.	+	20.87	18.01	1.15871
chr5	17185463	17189943	AT5G42870_ATPAH2,PAH2	.	-	58.4	50.4	1.1587
chr5	24167996	24170462	AT5G60020_ATLAC17,LAC17	.	+	16.71	14.42	1.1587
chr2	1966816	1968037	AT2G05380_GRP3S	.	+	18.83	16.25	1.15867
chr2	13857877	13859774	AT2G32670_ATVAMP725,VAMP725	.	+	15.33	13.23	1.15861
chr5	23275169	23277488	AT5G57460_	.	+	77.59	66.97	1.15855
chr1	5891324	5895075	AT1G17230_	.	+	25.06	21.63	1.1585
chr4	15849772	15854868	AT4G32850_nPAP,PAP(IV),PAPS4	.	+	69.52	60.01	1.15845
chr1	3127771	3131094	AT1G09660_	.	-	60.49	52.22	1.15834
chr1	20195264	20199130	AT1G54100_ALDH7B4	.	-	52.55	45.37	1.15822
chr3	5116141	5117615	AT3G15190_PRPS20	.	+	80.01	69.09	1.15803
chr1	17606558	17606818	AT1G47813_	.	+	13.26	11.45	1.15794
chr1	29056532	29062966	AT1G77320_MEI1	.	+	31.53	27.23	1.15786
chr2	15576024	15577877	AT2G37060_NF-YB8	.	+	37.4	32.3	1.15785
chr1	12370065	12371553	AT1G34030_	.	-	85.24	73.62	1.15782
chr2	18714574	18714729	AT2G45412_	.	-	10.85	9.37	1.15778
chr3	22484804	22491722	AT3G60860_	.	+	54.64	47.2	1.15759
chr5	1769648	1771515	AT5G05880_	.	+	16.89	14.59	1.15753
chr5	17348722	17348886	AT5G43211_	.	-	14.91	12.88	1.15749
chr4	11470883	11472981	AT4G21570_	.	-	58.43	50.48	1.15746
chr5	16621251	16622656	AT5G41560_	.	-	59.39	51.31	1.15744
chr4	13872079	13873907	AT4G27852_	.	-	15.65	13.52	1.15743
chr1	20029029	20031566	AT1G53650_CID8	.	-	47.37	40.93	1.1573
chr5	17467398	17467643	AT5G43480_	.	-	26.56	22.95	1.15723
chr3	18284857	18288059	AT3G49310_	.	-	61.86	53.46	1.1571
chr2	15876750	15879655	AT2G37940_AtIPCS2,ERH1	.	+	60.77	52.52	1.15705
chr1	3484580	3486965	AT1G10560_ATPUB18,PUB18	.	+	26.9	23.25	1.15692
chr1	8962125	8964564	AT1G25520_	.	+	64.31	55.59	1.15683
chr1	205176	207435	AT1G01570_	.	+	20.57	17.78	1.15683
chr3	21438084	21442021	AT3G57890_	.	+	73.03	63.13	1.15679
chr5	454783	459527	AT5G02250_ATMTRNASEII,EMB2730,RNR1	.	+	57.88	50.04	1.15664
chr5	708318	709703	AT5G03030_	.	-	65.79	56.88	1.15662
chr5	21952733	21953507	AT5G54095_	.	-	17.65	15.26	1.15652
chr5	19862289	19863625	AT5G48990_	.	+	98.73	85.37	1.15648
chr4	15556415	15558125	AT4G32210_SDH3-2	.	-	10.34	8.94	1.15642
chr3	7002817	7004450	AT3G20060_UBC19	.	-	71.27	61.64	1.1562
chr5	18593917	18597995	AT5G45840_	.	-	14.06	12.16	1.15612
chr4	13354992	13357602	AT4G26430_CSN6B	.	+	55.92	48.37	1.15606
chr2	7864314	7867766	AT2G18090_	.	+	60.81	52.6	1.15605
chr4	18384100	18385544	AT4G39570_	.	-	79.48	68.75	1.15605
chr3	2907548	2910091	AT3G09450_	.	+	21.43	18.54	1.1558
chr1	4587780	4588613	AT1G13370_	.	-	24.03	20.79	1.15577
chr4	5740297	5741524	AT4G08950_EXO	.	+	24.18	20.92	1.15576
chr3	925612	930974	AT3G03720_CAT4	.	-	46.02	39.82	1.15566
chr5	24761079	24764014	AT5G61580_PFK4	.	+	61.18	52.94	1.15562
chr1	3864153	3866969	AT1G11480_	.	-	64.11	55.48	1.15552
chr4	222320	225131	AT4G00490_BAM2,BMY9	.	+	46.22	40	1.15546
chr1	19978146	19980084	AT1G53530_	.	+	68.98	59.7	1.15542
chr1	20241226	20242615	AT1G54210_APG12,ATATG12,ATG12A	.	+	71.87	62.21	1.15526
chr5	4792072	4793868	AT5G14820_	.	-	5.87	5.08	1.15521
chr1	5362009	5365549	AT1G15570_CYCA2;3	.	+	24.33	21.06	1.1552
chr4	12781762	12785197	AT4G24800_ECIP1	.	+	55.24	47.82	1.15513
chr3	22771442	22773790	AT3G61530_PANB2	.	-	80.56	69.74	1.15513
chr2	16591222	16593775	AT2G39780_RNS2	.	+	66.96	57.97	1.15505
chr5	20800584	20801416	AT5G51190_	.	-	25.93	22.45	1.15494
chr3	18122197	18126742	AT3G48870_ATCLPC,ATHSP93-III,ClpC2,HSP93-III	.	-	41.39	35.84	1.15481
chr2	7499477	7503125	AT2G17250_EMB2762,NOC4	.	+	54.46	47.16	1.15476
chr5	19744431	19746190	AT5G48680_	.	-	77.07	66.74	1.15476
chr5	6246763	6249405	AT5G18730_	.	+	12.9	11.17	1.15474
chr1	10672998	10675368	AT1G30300_	.	+	56.12	48.6	1.1547
chr5	22175539	22176691	AT5G54585_	.	+	21.64	18.74	1.15467
chr1	8406686	8408525	AT1G23780_	.	-	83.31	72.15	1.15466
chr1	2428773	2432057	AT1G07870_	.	-	50.69	43.9	1.15463
chr5	21017027	21019221	AT5G51740_	.	+	58.46	50.63	1.15462
chr1	6998489	6999817	AT1G20190_ATEXP11,ATEXPA11,ATHEXP,EXP11,EXPA11	.	-	21.21	18.37	1.15452
chr3	4715707	4720951	AT3G14205_	.	-	53.94	46.72	1.1545
chr1	1482548	1484056	AT1G05140_	.	+	83.87	72.65	1.15442
chr4	13424549	13427319	AT4G26610_AGC1-2,D6PKL1	.	+	60.62	52.51	1.15442
chr1	6149301	6150038	AT1G17860_	.	+	21.3	18.45	1.15439
chr1	18391338	18393947	AT1G49710_ATFUT12,FUCT2,FUCTB,FUT12	.	-	61.99	53.7	1.15435
chr2	8472134	8475153	AT2G19580_TET2	.	-	18.92	16.39	1.15427
chr1	2583654	2586744	AT1G08230_	.	-	19.45	16.85	1.15421
chr4	17979763	17979885	AT4G38401_	.	-	15.41	13.35	1.15419
chr4	10493247	10496160	AT4G19190_	.	+	61.92	53.65	1.15412
chr5	20867602	20870745	AT5G51350_MOL1	.	-	32.15	27.86	1.15393
chr2	17849819	17854553	AT2G42890_AML2,ML2	.	+	41.23	35.73	1.15389
chr2	8678050	8682112	AT2G20100_	.	+	17.09	14.81	1.15385
chr1	29957562	29962305	AT1G79620_	.	-	24.22	20.99	1.15381
chr5	18244266	18246450	AT5G45130_ATRAB-F2A,ATRAB5A,ATRABF2A,RAB-F2A,RAB5A,RABF2A,RHA1	.	+	69.57	60.3	1.15371
chr5	23574992	23576084	AT5G58310_ATMES18,MES18	.	-	18.24	15.81	1.1536
chr5	23618109	23618345	AT5G58412_	.	+	17.43	15.11	1.15344
chr2	17630729	17634299	AT2G42330_	.	-	52.69	45.68	1.15343
chr4	5746289	5748285	AT4G08960_	.	+	98	84.97	1.15333
chr2	172256	174137	AT2G01390_EMB3111	.	+	50.56	43.84	1.15325
chr3	7839555	7842874	AT3G22220_	.	-	45.61	39.55	1.15319
chr2	17960700	17963727	AT2G43210_	.	+	44.94	38.97	1.15316
chr3	3006515	3008489	AT3G09800_	.	-	43.18	37.45	1.15296
chr3	8562829	8564670	AT3G23760_	.	-	53.37	46.29	1.15292
chr3	5934064	5935303	AT3G17350_	.	+	45.24	39.24	1.15287
chr2	12049989	12052453	AT2G28260_ATCNGC15,CNGC15	.	+	14.55	12.62	1.15281
chr5	2888655	2892016	AT5G09320_VPS9B	.	-	35.6	30.88	1.1528
chr1	22902150	22903837	AT1G61960_	.	+	63.37	54.97	1.15278
chr4	813068	815170	AT4G01883_	.	+	42.29	36.69	1.15259
chr5	21791177	21792441	AT5G53650_	.	+	86.88	75.39	1.15239
chr4	13542918	13548629	AT4G26970_ACO2	.	+	58.98	51.18	1.15237
chr5	16717996	16721222	AT5G41770_	.	+	66.78	57.95	1.15235
chr2	9649690	9651439	AT2G22690_	.	-	61.9	53.72	1.15224
chr3	21279666	21280948	AT3G57490_	.	-	110.98	96.32	1.15219
chr1	26063205	26063736	AT1G69325_	.	+	21.12	18.33	1.15213
chr1	495050	496062	AT1G02430_ARFD1B,ATARFD1B	.	-	18.34	15.92	1.15191
chr1	5428520	5429561	AT1G15772_	.	-	14.86	12.9	1.15182
chr5	20415771	20418742	AT5G50160_ATFRO8,FRO8	.	+	20.4	17.71	1.15181
chr5	17150238	17151681	AT5G42765_	.	-	85.69	74.4	1.15173
chr4	10477296	10480141	AT4G19160_	.	+	63.39	55.04	1.15168
chr5	17379486	17385535	AT5G43310_	.	-	40.39	35.07	1.15165
chr5	7418116	7419249	AT5G22390_	.	-	23.77	20.64	1.15157
chr2	18124648	18125868	AT2G43730_	.	-	17.01	14.77	1.15156
chr1	23207090	23209913	AT1G62680_	.	-	56.31	48.9	1.1515
chr2	16238476	16240834	AT2G38880_ATHAP3,ATNF-YB1,HAP3,HAP3A,NF-YB1	.	+	66.46	57.72	1.15139
chr4	13921677	13923570	AT4G27980_	.	+	16.65	14.46	1.15135
chr1	27516572	27517854	AT1G73177_APC13,BNS	.	-	28.29	24.57	1.15134
chr2	17538703	17538784	AT2G42020_	.	-	7.75	6.73	1.15134
chr5	25723243	25725451	AT5G64320_	.	-	68.62	59.6	1.15132
chr1	1576863	1582614	AT1G05380_	.	+	58.3	50.64	1.15123
chr2	8324716	8325965	AT2G19180_	.	+	86.42	75.07	1.15117
chr5	22131093	22133678	AT5G54510_DFL1,GH3.6	.	-	20.63	17.92	1.15114
chr5	18432458	18435469	AT5G45500_	.	-	40.9	35.53	1.1511
chr2	13866772	13872157	AT2G32700_LUH,MUM1	.	+	63.23	54.93	1.15107
chr1	7732280	7732468	AT1G21975_	.	+	9.44	8.2	1.15104
chr1	27421023	27423184	AT1G72870_	.	+	20.73	18.01	1.15094
chr5	8042876	8044819	AT5G23860_TUB8	.	+	55.44	48.17	1.15089
chr1	7600805	7604215	AT1G21651_	.	-	43.12	37.47	1.15075
chr5	10278691	10282614	AT5G28290_ATNEK3,NEK3	.	-	20.83	18.1	1.15075
chr4	15024472	15027616	AT4G30860_ASHR3,SDG4	.	+	16.25	14.12	1.15074
chr5	22280583	22282352	AT5G54850_	.	-	34.42	29.91	1.15074
chr5	19684006	19687151	AT5G48560_	.	+	19.47	16.92	1.15062
chr1	5705969	5709533	AT1G16690_	.	+	20.17	17.53	1.15051
chr5	18277620	18281875	AT5G45190_	.	-	68.33	59.39	1.15051
chr2	19617986	19622251	AT2G47940_DEG2,DEGP2,EMB3117	.	-	62.7	54.5	1.15043
chr5	16248286	16250894	AT5G40580_PBB2	.	-	51.09	44.41	1.15038
chr5	19386100	19388562	AT5G47880_ERF1-1	.	-	61.1	53.12	1.1502
chr5	17122171	17124353	AT5G42700_	.	+	20.59	17.9	1.1502
chr3	814473	814732	AT3G03430_	.	+	25.12	21.84	1.15011
chr4	11248078	11252724	AT4G21070_ATBRCA1,BRCA1	.	+	16.62	14.45	1.15007
chr1	9603178	9606101	AT1G27600_I9H,IRX9-L	.	-	78.24	68.03	1.15006
chr3	7151387	7153398	AT3G20480_AtLpxK,LpxK	.	-	19.61	17.05	1.15006
chr5	22488074	22491266	AT5G55520_	.	-	30.34	26.38	1.15006
chr5	5193111	5195396	AT5G15910_	.	+	55.25	48.04	1.15005
chr4	17888519	17896107	AT4G38120_	.	-	41.84	36.38	1.15004
chr5	3536226	3541133	AT5G11110_ATSPS2F,KNS2,SPS1,SPS2F,SPSA2	.	+	27.44	23.86	1.14998
chr5	1785927	1788436	AT5G05940_ATROPGEF5,ROPGEF5	.	+	22.46	19.53	1.14995
chr3	18211863	18215619	AT3G49140_	.	-	62.35	54.22	1.14992
chr1	202136	204335	AT1G01560_ATMPK11,MPK11	.	+	17.71	15.4	1.1499
chr4	11150160	11151758	AT4G20820_	.	+	20.17	17.54	1.14986
chr2	6277802	6283940	AT2G14680_MEE13	.	+	50.91	44.28	1.1497
chr1	8638520	8640825	AT1G24350_	.	-	60.09	52.27	1.14958
chr4	14517448	14518329	AT4G29610_	.	+	25.83	22.47	1.14947
chr3	3063774	3065575	AT3G09970_	.	+	98	85.26	1.14941
chr5	14969596	14971312	AT5G37680_ARLA1A,ATARLA1A	.	-	59.81	52.04	1.14928
chr3	21972840	21974923	AT3G59450_	.	+	18.7	16.27	1.14926
chr2	1474679	1480586	AT2G04270_RNE,RNEE/G	.	+	50.98	44.36	1.1492
chr2	19498368	19502246	AT2G47510_FUM1	.	+	69.27	60.28	1.14911
chr2	16681474	16683640	AT2G39960_	.	-	82.2	71.54	1.14899
chr4	6312104	6312557	AT4G10115_SCRL20	.	-	8.17	7.11	1.14888
chr2	17314532	17317003	AT2G41510_ATCKX1,CKX1	.	+	19.21	16.72	1.14883
chr4	387865	389113	AT4G00905_	.	+	45.07	39.23	1.14883
chr3	18585000	18587312	AT3G50120_	.	-	19.14	16.66	1.14877
chr5	22108273	22109379	AT5G54450_	.	-	18.39	16.01	1.14856
chr1	19664044	19665362	AT1G52800_	.	+	24.36	21.21	1.14844
chr1	28305297	28307503	AT1G75420_	.	+	67.79	59.03	1.14837
chr4	1143962	1147422	AT4G02600_ATMLO1,MLO1	.	+	53.89	46.93	1.14827
chr1	13701401	13703572	AT1G36390_	.	-	68.76	59.88	1.14827
chr3	502707	505230	AT3G02450_	.	-	47.78	41.61	1.14825
chr1	22893101	22893976	AT1G61930_	.	+	21.37	18.61	1.14823
chr5	23697841	23699767	AT5G58640_	.	+	69.84	60.83	1.14809
chr1	18668155	18670546	AT1G50400_	.	+	24.73	21.54	1.14803
chr5	25184397	25186711	AT5G62700_TUB3	.	+	60.73	52.9	1.14799
chr5	6342220	6344794	AT5G19000_ATBPM1,BPM1	.	+	92.87	80.9	1.14794
chr4	16892909	16894865	AT4G35590_RKD5	.	+	17.92	15.61	1.14789
chr2	18505239	18506906	AT2G44880_AHG11	.	+	26.86	23.4	1.1478
chr1	2296023	2299470	AT1G07480_	.	-	28.98	25.25	1.14766
chr3	10731518	10733032	AT3G28640_	.	-	44.37	38.66	1.14766
chr2	19537178	19538624	AT2G47640_	.	+	76.32	66.5	1.14765
chr2	1036008	1037632	AT2G03430_	.	-	56.59	49.31	1.14761
chr3	9480825	9482926	AT3G25900_ATHMT-1,HMT-1	.	+	17.64	15.37	1.14759
chr1	27029205	27030560	AT1G71865_	.	+	65.5	57.08	1.14749
chr5	8903505	8906311	AT5G25580_	.	+	31.59	27.53	1.14742
chr1	19764080	19764220	AT1G53039_	.	+	17.98	15.67	1.14732
chr2	18886069	18888674	AT2G45900_TRM13	.	-	16.43	14.32	1.14724
chr5	2362570	2364374	AT5G07470_ATMSRA3,PMSR3	.	-	72.71	63.38	1.14718
chr5	3740460	3742139	AT5G11630_NOXY2	.	+	67.29	58.66	1.14709
chr1	27928171	27929497	AT1G74270_	.	-	84.69	73.83	1.14707
chr5	16459584	16463272	AT5G41130_	.	-	39.09	34.08	1.14696
chr5	25779310	25780308	AT5G64490_	.	-	25.98	22.65	1.14695
chr3	17674382	17681730	AT3G47910_	.	-	55.1	48.04	1.14693
chr1	26111809	26113243	AT1G69460_	.	-	96.86	84.46	1.1468
chr1	24770575	24771371	AT1G66400_CML23	.	-	21.17	18.46	1.14672
chr5	7810683	7815039	AT5G23210_SCPL34	.	+	18.37	16.02	1.1466
chr3	18368821	18368988	AT3G49551_	.	-	51.08	44.55	1.14654
chr1	26226866	26228580	AT1G69720_HO3	.	+	18.22	15.89	1.14654
chr1	7767924	7770055	AT1G22040_	.	+	55.64	48.53	1.14648
chr5	26766128	26767250	AT5G67060_HEC1	.	+	23.32	20.34	1.14644
chr4	13088166	13090161	AT4G25680_	.	+	54.75	47.76	1.14633
chr4	17509621	17511364	AT4G37200_HCF164	.	-	86.42	75.39	1.14629
chr3	6659164	6660852	AT3G19220_CYO1,SCO2	.	+	81.66	71.24	1.14625
chr2	16467855	16469628	AT2G39440_	.	-	52.13	45.48	1.14619
chr1	23685093	23687363	AT1G63830_	.	+	63.98	55.82	1.14616
chr4	8195881	8198562	AT4G14220_RHF1A	.	+	68.13	59.45	1.14598
chr3	11136006	11137849	AT3G29170_	.	-	69.55	60.69	1.14596
chr1	28086800	28089367	AT1G74750_	.	+	34.7	30.28	1.14592
chr5	9147176	9148128	AT5G26170_ATWRKY50,WRKY50	.	-	15.62	13.63	1.14589
chr1	230994	232508	AT1G01640_	.	-	15.23	13.29	1.14586
chr1	10284121	10285970	AT1G29380_	.	+	23.96	20.91	1.14579
chr1	23192228	23195103	AT1G62640_KAS	.	+	57.53	50.21	1.14576
chr1	21791783	21797050	AT1G58848_	.	+	0.62	0.54	1.14545
chr1	4412887	4413057	AT1G12938_	.	+	7.79	6.8	1.14537
chr2	8362435	8366144	AT2G19280_	.	+	41.59	36.31	1.14537
chr5	2727821	2732893	AT5G08450_HDC1,RXT3-like	.	-	48.13	42.02	1.14537
chr2	12085377	12088060	AT2G28310_	.	+	46.95	40.99	1.14537
chr5	23808461	23811258	AT5G58970_ATUCP2,UCP2	.	-	46.78	40.85	1.14513
chr4	11008666	11013860	AT4G20400_JMJ14,PKDM7B	.	+	39.21	34.24	1.14511
chr4	6188767	6190853	AT4G09830_	.	+	73.25	63.97	1.14505
chr5	20877967	20878464	AT5G51390_	.	-	19.57	17.09	1.14503
chr3	22609040	22609822	AT3G61090_	.	-	18.94	16.54	1.14502
chr2	15637046	15639522	AT2G37230_	.	-	63	55.02	1.14501
chr1	26877745	26880024	AT1G71310_ODB1,RAD52-1,RAD52-1A,RAD52-1B.1,RAD52-1B.2	.	-	70.37	61.46	1.14495
chr4	12972708	12974870	AT4G25370_	.	+	69.13	60.38	1.14489
chr1	18361679	18363192	AT1G49610_	.	-	42.27	36.92	1.14487
chr5	23626826	23632223	AT5G58450_	.	+	46.62	40.72	1.14486
chr1	27211845	27214665	AT1G72280_AERO1,ERO1	.	-	37.14	32.44	1.14484
chr3	7676054	7676384	AT3G21781_	.	+	25.13	21.95	1.14481
chr2	10248911	10254641	AT2G24120_PDE319,SCA3	.	-	50.59	44.19	1.1448
chr1	26983721	26985990	AT1G71720_PDE338,RLSB	.	+	70	61.15	1.1447
chr5	4826479	4827980	AT5G14920_GASA14	.	+	22.54	19.69	1.14467
chr3	1888836	1892775	AT3G06250_FRS7	.	-	50.16	43.82	1.14465
chr3	6413301	6416550	AT3G18640_	.	-	41.56	36.31	1.14455
chr4	9429875	9432437	AT4G16765_	.	-	38.1	33.29	1.14444
chr3	18729054	18730269	AT3G50470_HR3,MLA10	.	+	19.26	16.83	1.1443
chr3	22964614	22971384	AT3G62010_	.	+	47.66	41.65	1.14426
chr1	27963953	27965341	AT1G74400_	.	+	22.92	20.03	1.14421
chr5	22424577	22429502	AT5G55300_MGO1,TOP1,TOP1ALPHA	.	-	42.21	36.89	1.14417
chr4	11767513	11768452	AT4G22250_	.	-	24.83	21.7	1.14417
chr5	17191577	17194131	AT5G42880_	.	+	15.07	13.17	1.14416
chr5	19771138	19772738	AT5G48760_	.	-	98.14	85.78	1.14407
chr3	18008657	18009982	AT3G48590_ATHAP5A,HAP5A,NF-YC1	.	-	112.23	98.1	1.14402
chr1	8263827	8266048	AT1G23300_	.	-	22.65	19.8	1.14387
chr4	1112141	1114029	AT4G02530_	.	-	81.43	71.19	1.14382
chr1	25810321	25811128	AT1G68730_	.	-	99.49	86.99	1.14368
chr2	5934556	5936371	AT2G14100_CYP705A13	.	-	12.57	10.99	1.14364
chr2	8438393	8441384	AT2G19480_NAP1;2,NFA02,NFA2	.	+	59.08	51.66	1.1436
chr3	4469222	4473547	AT3G13670_	.	+	67.27	58.83	1.14344
chr4	17935402	17937068	AT4G38250_	.	+	120.64	105.51	1.14339
chr1	3715184	3717320	AT1G11120_	.	+	19.37	16.94	1.14336
chr1	343166	344341	AT1G01990_	.	-	106.31	92.99	1.14323
chr1	20213967	20215223	AT1G54140_TAF9,TAFII21	.	-	69.14	60.48	1.14316
chr1	2936528	2939326	AT1G09100_RPT5B	.	-	49.74	43.51	1.14315
chr3	22340957	22342315	AT3G60450_	.	+	67.48	59.03	1.14312
chr1	23399391	23401367	AT1G63100_	.	-	19.56	17.11	1.14311
chr5	21683679	21687970	AT5G53440_	.	-	64.14	56.11	1.14309
chr4	7598093	7599257	AT4G13000_	.	-	21.72	19	1.14308
chr4	13009695	13013971	AT4G25450_ABCB28,ATNAP8,NAP8	.	-	54.06	47.3	1.14289
chr1	30286956	30287741	AT1G80555_	.	+	30.15	26.38	1.14286
chr3	625163	627367	AT3G02860_	.	-	57.46	50.28	1.14277
chr2	9433765	9436544	AT2G22190_TPPE	.	-	16.88	14.77	1.14276
chr1	22176934	22180875	AT1G60140_ATTPS10,TPS10,TPS10	.	-	44.35	38.81	1.14271
chr3	6958648	6961652	AT3G19970_	.	+	41.43	36.26	1.14254
chr2	12781591	12785053	AT2G29980_AtFAD3,FAD3	.	-	15.4	13.48	1.14233
chr5	2515587	2516694	AT5G07880_ATSNAP29,SNAP29	.	-	15.4	13.48	1.14233
chr5	1735725	1738700	AT5G05780_AE3,ATHMOV34,RPN8A	.	+	65.81	57.61	1.14231
chr4	271487	271879	AT4G00651_	.	-	17.84	15.62	1.14203
chr1	29285078	29285889	AT1G77870_MUB5	.	+	16.24	14.22	1.14195
chr1	19417666	19419853	AT1G52155_	.	+	40.54	35.5	1.14193
chr3	23300290	23301473	AT3G63060_EDL3	.	-	32.6	28.55	1.14181
chr1	4282899	4285829	AT1G12580_PEPKR1	.	+	62.08	54.37	1.14178
chr2	8662038	8662614	AT2G20070_	.	+	9.02	7.9	1.14159
chr2	9866619	9866792	AT2G23171_	.	-	12.89	11.29	1.14159
chr5	18525071	18527007	AT5G45660_	.	+	67.9	59.48	1.14154
chr3	20743443	20745083	AT3G55920_	.	-	52.95	46.39	1.14138
chr2	8959255	8962001	AT2G20815_QWRF3	.	+	15.74	13.79	1.1413
chr3	5518331	5519246	AT3G16280_	.	+	24.63	21.58	1.14127
chr1	3712999	3713735	AT1G11112_	.	-	16.88	14.79	1.14122
chr4	13948603	13957840	AT4G28080_	.	-	52.52	46.02	1.14121
chr5	817864	825149	AT5G03360_	.	+	16.66	14.6	1.141
chr5	1853432	1855888	AT5G06130_	.	-	63.38	55.55	1.14093
chr3	1883616	1884953	AT3G06220_	.	-	13.52	11.85	1.14081
chr5	5827171	5829682	AT5G17690_AtLHP1,LHP1,TFL2	.	-	66.27	58.09	1.14079
chr2	18961403	18962376	AT2G46150_	.	+	21.14	18.53	1.14078
chr1	996115	1000437	AT1G03910_CTN	.	+	56.4	49.44	1.14075
chr1	21304856	21304892	AT1G57460_	.	+	5.34	4.68	1.14072
chr5	22293325	22295144	AT5G54890_mCSF2	.	+	52.47	46	1.14062
chr1	10994321	10996134	AT1G30890_	.	+	57.99	50.84	1.14061
chr5	5877189	5879331	AT5G17800_AtMYB56,MYB56	.	+	22.3	19.55	1.14059
chr5	9483251	9484120	AT5G26950_AGL93	.	-	8.35	7.32	1.14052
chr1	22152230	22154589	AT1G60080_	.	-	56.18	49.26	1.14045
chr3	3160237	3161614	AT3G10210_	.	-	78.84	69.13	1.14044
chr2	8158198	8160091	AT2G18840_YIP4a	.	+	76.25	66.86	1.14042
chr2	1588360	1590166	AT2G04550_DSPTP1E,IBR5	.	+	69.3	60.77	1.14034
chr4	17093088	17096573	AT4G36120_	.	-	20.31	17.81	1.14029
chr1	27743872	27744168	AT1G73780_	.	+	33.97	29.79	1.14027
chr2	13584139	13586700	AT2G31955_CNX2	.	-	67.07	58.82	1.14023
chr1	21930010	21931366	AT1G59670_ATGSTU15,GSTU15	.	+	16.01	14.04	1.14021
chr1	29621340	29623156	AT1G78780_	.	-	13.17	11.55	1.14014
chr5	7981398	7981469	AT5G23665_	.	+	8.86	7.77	1.1401
chr3	740770	742309	AT3G03210_	.	+	99.71	87.46	1.14005
chr4	17639533	17640665	AT4G37540_LBD39	.	-	25.9	22.72	1.1399
chr1	13696042	13698639	AT1G36370_SHM7	.	-	73.95	64.88	1.13978
chr4	14665691	14670030	AT4G29990_	.	-	13.69	12.01	1.13977
chr4	3663485	3665981	AT4G06598_	.	+	45.09	39.56	1.13975
chr1	6131537	6135345	AT1G17820_	.	-	33.76	29.62	1.13972
chr1	28185504	28188075	AT1G75080_BZR1	.	+	67.5	59.23	1.1396
chr1	18818559	18820503	AT1G50770_	.	-	20.09	17.63	1.13946
chr2	15203904	15204146	AT2G36261_	.	-	9.96	8.74	1.13943
chr1	28522554	28524337	AT1G75980_	.	-	62.43	54.79	1.13942
chr4	15056975	15059794	AT4G30950_FAD6,FADC,SFD4	.	-	64.7	56.79	1.13926
chr5	16968658	16970432	AT5G42420_	.	+	64.4	56.53	1.13919
chr1	22782607	22786859	AT1G61690_	.	-	38.62	33.9	1.13919
chr3	4009275	4011399	AT3G12620_	.	-	60.09	52.75	1.13912
chr3	2035003	2037788	AT3G06540_AthREP,REP	.	-	83.35	73.17	1.13911
chr5	5068301	5072492	AT5G15580_LNG1,TRM2	.	-	17.76	15.59	1.1391
chr3	11234242	11236458	AT3G29270_	.	+	68.01	59.72	1.13879
chr3	9743729	9743842	AT3G26539_	.	-	26.99	23.7	1.13876
chr1	9151732	9154740	AT1G26460_	.	+	69.77	61.28	1.13852
chr2	8802344	8804373	AT2G20410_	.	+	59.02	51.84	1.13848
chr1	26266609	26269013	AT1G69790_	.	+	19.97	17.54	1.13846
chr5	7277183	7280255	AT5G22000_RHF2A	.	+	59.93	52.64	1.13846
chr1	2696412	2700959	AT1G08520_ALB-1V,ALB1,CHLD,PDE166,V157	.	+	55.66	48.89	1.13845
chr2	11341684	11343572	AT2G26670_ATHO1,GUN2,HO1,HY1,HY6,TED4	.	+	70.46	61.9	1.13827
chr2	15023559	15025465	AT2G35738_	.	+	34.09	29.95	1.13818
chr1	2291457	2294588	AT1G07470_	.	+	33.02	29.01	1.13818
chr4	7600551	7602729	AT4G13010_	.	+	64.75	56.89	1.13814
chr4	15284389	15287306	AT4G31540_ATEXO70G1,EXO70G1	.	-	58.35	51.27	1.13807
chr5	22369095	22371867	AT5G55120_VTC5	.	+	49.13	43.17	1.13803
chr1	26927984	26930316	AT1G71460_	.	-	54.82	48.17	1.13802
chr2	12654456	12655457	AT2G29590_	.	-	75.45	66.3	1.13799
chr1	19918047	19923807	AT1G53390_ABCG24	.	+	42.15	37.04	1.13792
chr4	17039063	17041141	AT4G36010_	.	-	16.41	14.42	1.13791
chr1	3665087	3667139	AT1G10970_ATZIP4,ZIP4	.	-	37.16	32.66	1.13774
chr3	20916172	20921338	AT3G56410_	.	-	45.41	39.92	1.13749
chr2	81436	83290	AT2G01100_	.	+	74.9	65.85	1.13741
chr5	16414038	16414504	AT5G40970_	.	+	92.63	81.45	1.13725
chr1	23105941	23109476	AT1G62430_ATCDS1,CDS1	.	-	61.74	54.29	1.1372
chr1	5304317	5306012	AT1G15430_	.	+	56.71	49.87	1.13713
chr3	700456	704769	AT3G03090_AtVGT1,VGT1	.	-	41.37	36.38	1.13713
chr1	9662085	9667539	AT1G27752_	.	+	63.28	55.65	1.13708
chr1	8195776	8196475	AT1G23100_	.	+	51.05	44.9	1.13694
chr3	5595929	5599224	AT3G16470_JAL35,JR1	.	-	12.61	11.09	1.13694
chr1	1419080	1421789	AT1G04990_	.	-	39.27	34.54	1.1369
chr2	8825053	8825544	AT2G20465_	.	-	15.19	13.36	1.13687
chr1	1965840	1967219	AT1G06450_	.	+	45.27	39.82	1.13683
chr2	9778877	9783251	AT2G22980_SCPL13	.	+	16.61	14.61	1.1368
chr5	19908626	19909399	AT5G49120_	.	-	11.63	10.23	1.13672
chr2	13556500	13559767	AT2G31890_ATRAP,RAP	.	-	39.08	34.38	1.13667
chr5	15320507	15324061	AT5G38340_	.	+	17.46	15.36	1.13663
chr3	3946036	3946960	AT3G12410_	.	-	33.2	29.21	1.13655
chr4	13734999	13736518	AT4G27470_ATRMA3,RMA3	.	+	68.18	59.99	1.1365
chr3	1376175	1378500	AT3G04970_	.	+	50.79	44.69	1.13647
chr3	4254743	4257409	AT3G13224_	.	+	78.23	68.84	1.13638
chr5	19286450	19286995	AT5G47550_	.	-	20.99	18.47	1.13636
chr3	7174464	7177942	AT3G20550_DDL	.	-	51.84	45.62	1.13631
chr5	1505122	1507224	AT5G05100_	.	-	74.73	65.77	1.13621
chr5	3621561	3625645	AT5G11350_	.	+	53.56	47.14	1.13616
chr1	9244981	9246603	AT1G26740_	.	-	69.75	61.39	1.13616
chr5	4888964	4891603	AT5G15090_ATVDAC3,VDAC3	.	-	52.35	46.08	1.13604
chr3	21334284	21336674	AT3G57610_ADSS	.	-	82.33	72.47	1.13604
chr1	22337375	22339672	AT1G60640_	.	-	66.34	58.4	1.13594
chr2	11034652	11036910	AT2G25880_AtAUR2,AUR2	.	-	27.4	24.12	1.13593
chr1	17353847	17356533	AT1G47340_	.	-	33.59	29.57	1.1359
chr4	713216	713389	AT4G01671_	.	-	11.61	10.22	1.13587
chr3	7835144	7839061	AT3G22200_GABA-T,HER1,POP2	.	+	53.6	47.19	1.13581
chr1	28977357	28978743	AT1G77122_	.	-	65.93	58.05	1.13572
chr5	8969215	8972125	AT5G25770_	.	-	17.15	15.1	1.13567
chr3	6210904	6212433	AT3G18130_RACK1C,RACK1C_AT	.	-	103.54	91.17	1.13567
chr4	15297014	15306410	AT4G31570_	.	+	39.85	35.09	1.13561
chr4	16264389	16265420	AT4G33930_	.	-	23.94	21.08	1.13561
chr3	21134924	21135334	AT3G57110_	.	+	24.28	21.38	1.13558
chr5	2193966	2195963	AT5G07060_MAC5C	.	-	18.79	16.55	1.13527
chr1	26618321	26620388	AT1G70590_	.	+	103.29	90.99	1.13516
chr5	26195689	26198322	AT5G65540_	.	+	73.9	65.11	1.13498
chr4	12938956	12940744	AT4G25280_	.	-	47.76	42.08	1.13495
chr3	22155705	22158954	AT3G59990_MAP2B	.	-	63.59	56.03	1.1349
chr3	9644383	9646064	AT3G26320_CYP71B36	.	-	20.19	17.79	1.13483
chr4	14018183	14020251	AT4G28320_AtMAN5,MAN5	.	-	52.87	46.59	1.13476
chr1	19149496	19151730	AT1G51645_	.	+	41.26	36.36	1.13473
chr4	15223655	15224685	AT4G31370_FLA5	.	-	20.63	18.18	1.13469
chr1	27002414	27008176	AT1G71810_	.	-	54.08	47.66	1.13468
chr1	1717447	1718909	AT1G05720_	.	-	66.3	58.43	1.13467
chr1	699121	699246	AT1G03022_	.	+	14.83	13.07	1.13456
chr3	1235283	1238493	AT3G04580_EIN4	.	-	45.84	40.41	1.13434
chr2	10072233	10073126	AT2G23690_	.	+	20.35	17.94	1.13426
chr3	7454269	7457379	AT3G21240_4CL2,AT4CL2	.	-	20.27	17.87	1.13423
chr2	15873117	15874972	AT2G37930_	.	+	53.07	46.79	1.13419
chr3	19662281	19664505	AT3G53030_SRPK4	.	+	74.37	65.57	1.13419
chr4	6420455	6422380	AT4G10360_	.	+	66.96	59.04	1.13412
chr1	9155091	9156246	AT1G26470_SNS1	.	+	83.28	73.43	1.13412
chr1	6731434	6734882	AT1G19450_	.	-	33.56	29.59	1.13412
chr2	7617210	7621109	AT2G17520_ATIRE1-2,AtIRE1A,IRE1-2,IRE1A	.	+	50.73	44.73	1.13411
chr3	106636	113618	AT3G01320_SNL1	.	+	44.51	39.25	1.13398
chr4	14903487	14904917	AT4G30500_	.	+	65.42	57.69	1.13397
chr2	16309798	16312541	AT2G39080_EMB2799	.	-	47.65	42.02	1.13395
chr5	2227571	2233417	AT5G07180_ERL2	.	-	21.07	18.58	1.13394
chr5	15375846	15376301	AT5G38400_	.	+	26.24	23.14	1.13391
chr3	1843324	1843394	AT3G06105_	.	-	16.35	14.42	1.13375
chr4	15842453	15844536	AT4G32830_AtAUR1,AUR1	.	+	20.42	18.01	1.13374
chr2	12964506	12965468	AT2G30424_TCL2	.	-	13.13	11.58	1.13374
chr4	1147634	1149336	AT4G02610_	.	+	48.45	42.74	1.13357
chr5	5363661	5365334	AT5G16400_ATF2,TRXF2	.	-	72.24	63.73	1.13351
chr3	17590729	17591455	AT3G47710_BHLH161,BNQ3	.	+	13.83	12.2	1.1335
chr5	24689151	24691095	AT5G61420_AtMYB28,HAG1,MYB28,PMG1	.	-	21.31	18.8	1.13344
chr4	14862009	14863185	AT4G30390_	.	-	94.73	83.59	1.13325
chr5	4768468	4772153	AT5G14760_AO,FIN4	.	+	42.78	37.75	1.13321
chr1	557092	557986	AT1G02620_	.	+	24.42	21.55	1.13312
chr4	15114250	15115633	AT4G31050_LIP2	.	+	63.93	56.42	1.13309
chr5	5199711	5202452	AT5G15930_PAM1	.	+	26.05	22.99	1.13304
chr3	19924568	19927026	AT3G53780_ATRBL4,RBL4	.	-	60.8	53.66	1.13304
chr3	1940973	1946924	AT3G06400_CHR11	.	+	61.4	54.19	1.13303
chr5	3351037	3352879	AT5G10600_CYP81K2	.	+	41.73	36.83	1.13301
chr1	9671638	9676157	AT1G27770_ACA1,PEA1	.	-	43.89	38.74	1.1329
chr1	19603811	19606287	AT1G52620_	.	+	61.72	54.48	1.13287
chr5	17236736	17237125	AT5G42965_	.	+	17.47	15.42	1.13286
chr3	1753467	1755631	AT3G05870_APC11	.	+	49.7	43.88	1.1326
chr5	451423	453157	AT5G02240_	.	+	62	54.74	1.1326
chr4	14960646	14962466	AT4G30690_	.	+	59.23	52.3	1.13248
chr1	16140816	16141655	AT1G43000_	.	+	22.05	19.47	1.13244
chr1	3837821	3840207	AT1G11400_PYM	.	+	56.78	50.14	1.1324
chr3	21384204	21384572	AT3G57690_AGP23,ATAGP23	.	+	14.46	12.77	1.13224
chr1	8507010	8508864	AT1G24050_	.	+	76.37	67.45	1.13223
chr5	1368542	1371480	AT5G04740_ACR12	.	-	55.75	49.24	1.13218
chr1	7051577	7053641	AT1G20370_	.	-	72.17	63.75	1.13206
chr5	23346760	23350039	AT5G57655_	.	+	42.77	37.78	1.13205
chr3	9961319	9964597	AT3G27020_AtYSL6,YSL6	.	-	62.01	54.78	1.13196
chr2	14300772	14302430	AT2G33800_EMB3113	.	-	107.28	94.78	1.13187
chr5	9508718	9515407	AT5G27030_TPR3	.	-	42.74	37.76	1.13185
chr3	4375425	4376069	AT3G13435_	.	+	13.99	12.36	1.13177
chr1	22020519	22022484	AT1G59830_PP2A-1	.	-	93.56	82.67	1.13171
chr5	3669000	3669072	AT5G11475_	.	-	2.31	2.04	1.13171
chr3	8705636	8708315	AT3G24120_	.	-	62.31	55.06	1.13165
chr5	23009098	23009709	AT5G56880_	.	-	28.96	25.59	1.13164
chr5	9437297	9441779	AT5G26830_	.	+	63.79	56.37	1.13161
chr1	10496730	10497287	AT1G29962_AGL64	.	+	22.18	19.6	1.13157
chr3	16504460	16507404	AT3G45100_SETH2	.	+	47.23	41.74	1.1315
chr1	25538945	25541741	AT1G68140_	.	-	68.5	60.54	1.13146
chr1	29800693	29803939	AT1G79230_ATMST1,ATRDH1,MST1,ST1,STR1	.	+	55.01	48.62	1.1314
chr1	10498310	10499462	AT1G29965_	.	-	86.79	76.71	1.13139
chr1	29798935	29800525	AT1G79220_	.	+	41.41	36.6	1.13138
chr2	14228972	14231309	AT2G33610_ATSWI3B,CHB2,SWI3B	.	+	64.35	56.88	1.13131
chr2	899690	900946	AT2G03050_EMB93,SOLDAT10	.	-	78.31	69.22	1.1313
chr1	21146239	21149805	AT1G56460_	.	+	55.41	48.98	1.13125
chr1	7858864	7859766	AT1G22250_	.	+	23.44	20.72	1.13121
chr1	7826289	7828326	AT1G22170_	.	+	24.39	21.56	1.1312
chr3	9271800	9273615	AT3G25530_ATGHBDH,AtGLYR1,GHBDH,GLYR1,GR1	.	-	71.31	63.04	1.13117
chr2	5753271	5757239	AT2G13800_ATSERK5,BAK8,SERK5	.	+	33.28	29.42	1.13116
chr3	23051544	23053817	AT3G62290_ARFA1E,ATARFA1E	.	+	76.93	68.01	1.13114
chr5	17512476	17515495	AT5G43600_ATAAH-2,UAH	.	+	53.9	47.65	1.13114
chr3	9941138	9943480	AT3G26950_	.	-	75.86	67.08	1.13087
chr1	13533411	13544009	AT1G36160_ACC1,AT-ACC1,EMB22,GK,GSD1,PAS3,SFR3	.	+	51.08	45.17	1.13081
chr2	7685388	7689436	AT2G17700_STY8	.	-	64.23	56.8	1.13079
chr2	941912	950328	AT2G03140_	.	+	62.53	55.3	1.13072
chr1	17321173	17323484	AT1G47260_APFI,GAMMA	.	-	78.22	69.18	1.13065
chr2	3257585	3258064	AT2G07672_	.	+	0.51	0.45	1.13043
chr2	7045538	7048326	AT2G16270_	.	-	13	11.5	1.13032
chr1	5851953	5853955	AT1G17120_CAT8	.	+	74	65.47	1.13027
chr3	17313646	17316566	AT3G47000_	.	-	45.9	40.61	1.13023
chr4	17433601	17437069	AT4G36980_	.	-	67.97	60.14	1.13017
chr1	23933380	23936867	AT1G64430_	.	+	84.78	75.02	1.13008
chr5	5786510	5788239	AT5G17550_AtPEX19-2,PEX19-2	.	-	61.3	54.25	1.12993
chr5	8516635	8522767	AT5G24810_	.	-	57.84	51.19	1.12988
chr1	22051295	22053885	AT1G59900_AT-E1,E1	.	+	82.05	72.62	1.12984
chr5	2330385	2332281	AT5G07370_ATIPK2A,IMPK,IPK2a	.	+	61.98	54.86	1.12976
chr5	25315624	25318347	AT5G63110_ATHDA6,AXE1,HDA6,RPD3B,RTS1,SIL1	.	-	66.72	59.06	1.12968
chr1	3951553	3957044	AT1G11720_ATSS3,SS3	.	+	40.68	36.01	1.12965
chr5	15102200	15103669	AT5G37930_	.	-	99.79	88.34	1.1296
chr5	17864520	17865707	AT5G44350_	.	+	19.69	17.43	1.12959
chr3	23023437	23025732	AT3G62200_	.	-	76.05	67.33	1.12949
chr4	13121068	13121955	AT4G25780_	.	+	24.59	21.77	1.12948
chr3	3420130	3420832	AT3G10930_	.	-	16.06	14.22	1.1293
chr1	761282	766158	AT1G03160_FZL	.	+	71.03	62.9	1.12923
chr5	3961106	3963522	AT5G12250_TUB6	.	-	61.95	54.86	1.12921
chr3	1698112	1701399	AT3G05740_RECQI1	.	+	22.72	20.12	1.12916
chr1	29689153	29694255	AT1G78955_CAMS1	.	-	15.64	13.85	1.12915
chr2	14318964	14320591	AT2G33847_	.	-	51.84	45.91	1.12914
chr2	9051748	9054613	AT2G21120_	.	-	68.9	61.02	1.12912
chr2	8372947	8374453	AT2G19330_PIRL6	.	+	18.97	16.8	1.12909
chr5	24923774	24927314	AT5G62050_ATOXA1,OXA1,OXA1AT	.	-	60.4	53.5	1.12895
chr3	10932966	10933058	AT3G28918_	.	+	17.44	15.45	1.12872
chr3	9191832	9191924	AT3G25233_	.	-	26.66	23.62	1.12865
chr4	808376	810446	AT4G01870_	.	-	54.04	47.88	1.12863
chr2	8203730	8206395	AT2G18940_	.	-	58.44	51.78	1.1286
chr3	555626	557723	AT3G02610_	.	+	22.2	19.67	1.12856
chr2	16518968	16521478	AT2G39620_	.	-	19.34	17.14	1.12828
chr4	16682580	16684848	AT4G35050_MSI3,NFC3	.	-	33.52	29.71	1.1282
chr1	5137014	5137957	AT1G14890_	.	+	23.23	20.59	1.12816
chr3	21839197	21842755	AT3G59090_Cand3	.	+	60.19	53.36	1.12797
chr4	13307461	13308953	AT4G26288_	.	+	17.09	15.15	1.12797
chr4	2427799	2429850	AT4G04770_ABC1,ABCI8,ATABC1,ATNAP1,LAF6	.	-	69.36	61.49	1.12797
chr5	21677146	21683494	AT5G53430_ATX5,SDG29,SET29	.	+	40.89	36.25	1.12796
chr1	22483207	22485969	AT1G61040_VIP5	.	+	57.22	50.73	1.12791
chr2	547215	549616	AT2G02148_	.	-	45.77	40.58	1.12786
chr1	9215901	9218010	AT1G26670_ATVTI12,VTI12,VTI1B	.	+	61.73	54.74	1.12767
chr4	6366261	6367185	AT4G10230_	.	+	2.11	1.87	1.12766
chr3	19945571	19947719	AT3G53840_	.	+	29.15	25.85	1.12761
chr4	11575096	11577195	AT4G21810_DER2.1	.	-	66.37	58.86	1.12757
chr3	976933	977223	AT3G03820_SAUR29	.	-	22.8	20.22	1.12753
chr2	14028282	14031164	AT2G33070_ATNSP2,NSP2	.	-	20.33	18.03	1.12749
chr5	23485500	23486818	AT5G58020_	.	+	104.01	92.25	1.12747
chr3	19369362	19371074	AT3G52220_	.	-	69.55	61.7	1.12721
chr3	19189049	19192051	AT3G51740_IMK2	.	+	40.59	36.01	1.12715
chr5	3255305	3257807	AT5G10350_	.	-	63.8	56.61	1.12699
chr5	22482160	22484631	AT5G55500_ATXYLT,XYLT	.	+	80.68	71.59	1.12696
chr2	18316278	18320789	AT2G44350_ATCS,CSY4	.	+	59.62	52.91	1.1268
chr5	7953529	7955640	AT5G23590_	.	-	55.1	48.9	1.12676
chr1	19057780	19059582	AT1G51405_	.	+	13.33	11.83	1.12669
chr3	3320263	3321724	AT3G10620_ATNUDX26,NUDX26	.	+	64.49	57.24	1.12664
chr1	21207537	21209596	AT1G56600_AtGolS2,GolS2	.	+	20.1	17.84	1.12661
chr1	7276943	7281138	AT1G20910_	.	-	50.89	45.17	1.1266
chr3	19057013	19060036	AT3G51340_	.	-	18.86	16.74	1.12657
chr5	23571879	23575084	AT5G58300_	.	+	17.44	15.48	1.12653
chr3	1877594	1879348	AT3G06200_	.	+	84.95	75.41	1.12649
chr4	17098956	17104479	AT4G36140_	.	-	51.12	45.38	1.12646
chr5	18694316	18695734	AT5G46100_	.	-	69.58	61.78	1.12623
chr3	9746895	9749046	AT3G26550_	.	-	17.75	15.76	1.12619
chr2	15787705	15789853	AT2G37640_ATEXP3,ATEXPA3,ATHEXP,EXP3	.	-	19.18	17.03	1.12617
chr1	20452593	20454249	AT1G54840_	.	-	20.43	18.14	1.12617
chr4	4045390	4045647	AT4G06740_	.	-	4.73	4.2	1.12589
chr5	26404894	26410255	AT5G66030_ATGRIP,GRIP	.	-	47.32	42.03	1.12583
chr2	15765784	15767878	AT2G37585_	.	+	58.26	51.75	1.12577
chr5	6540003	6545015	AT5G19400_SMG7	.	+	56.65	50.32	1.12577
chr2	1527016	1528493	AT2G04390_	.	+	43	38.2	1.12562
chr4	18185667	18189224	AT4G39030_EDS5,SCORD3,SID1	.	+	18.36	16.31	1.12561
chr1	26824677	26826748	AT1G71140_	.	+	16.67	14.81	1.12551
chr1	6657260	6659569	AT1G19260_	.	-	2.77	2.46	1.12551
chr5	24469587	24470895	AT5G60820_	.	+	117.03	103.98	1.12549
chr2	19180730	19181467	AT2G46690_SAUR32	.	+	32.2	28.61	1.12544
chr3	8937588	8937776	AT3G24516_	.	-	19.84	17.63	1.12528
chr2	17650225	17651083	AT2G42388_	.	+	20.66	18.36	1.1252
chr1	6304360	6305689	AT1G18320_	.	+	31.13	27.67	1.125
chr5	20571681	20575250	AT5G50530_	.	-	0.08	0.07	1.125
chr4	10501200	10505217	AT4G19210_ABCE2,ATRLI2,RLI2	.	+	58.05	51.6	1.12498
chr5	8330315	8331837	AT5G24400_EMB2024,PGL3	.	-	80.84	71.86	1.12495
chr1	26316027	26320220	AT1G69870_AtNPF2.13,NPF2.13,NRT1.7	.	+	20.7	18.4	1.12493
chr5	26354853	26357866	AT5G65890_ACR1	.	+	19.46	17.3	1.12478
chr1	20554352	20558529	AT1G55090_	.	+	59.07	52.52	1.12469
chr3	15015140	15018071	AT3G42950_	.	+	54.3	48.28	1.12466
chr1	7001201	7004418	AT1G20200_EMB2719,HAP15	.	-	74.64	66.37	1.12459
chr3	3576017	3578082	AT3G11397_PRA1.A3	.	+	69.99	62.24	1.1245
chr1	17882136	17883855	AT1G48400_	.	-	16.62	14.78	1.12441
chr1	2821552	2825275	AT1G08820_VAP27-2	.	-	56.58	50.32	1.12438
chr1	9376788	9377244	AT1G27008_	.	-	21.34	18.98	1.12428
chr5	26575000	26578826	AT5G66600_	.	-	32.03	28.49	1.12421
chr5	931904	937641	AT5G03650_SBE2.2	.	+	65.36	58.14	1.12416
chr5	23456565	23460613	AT5G57940_ATCNGC5,CNGC5	.	+	58.14	51.72	1.12411
chr3	3325170	3330892	AT3G10650_AtNUP1,NUP1	.	-	55.43	49.31	1.12409
chr3	6042947	6044504	AT3G17680_	.	-	23	20.46	1.12408
chr5	8953451	8955790	AT5G25754_	.	+	16.13	14.35	1.12396
chr1	8916059	8918232	AT1G25420_	.	+	64.57	57.45	1.12391
chr3	678688	680605	AT3G03010_	.	-	48.75	43.38	1.12376
chr1	3512795	3514729	AT1G10630_ARFA1F,ATARFA1F	.	-	55.48	49.37	1.12373
chr2	15417490	15419154	AT2G36780_	.	-	19.79	17.61	1.12372
chr3	18126870	18129189	AT3G48880_	.	+	64.84	57.7	1.12372
chr1	313101	315902	AT1G01910_	.	-	61.6	54.82	1.12365
chr2	10781851	10788065	AT2G25320_	.	-	49.89	44.4	1.12362
chr3	21986541	21988326	AT3G59500_	.	+	66.81	59.46	1.12359
chr3	8404358	8404684	AT3G23440_EDA6,MEE37	.	-	16.18	14.4	1.12353
chr5	22197629	22202110	AT5G54650_ATFH5,Fh5	.	-	30.85	27.46	1.12341
chr3	17743114	17748736	AT3G48060_	.	-	24.67	21.96	1.12335
chr3	21370903	21373446	AT3G57670_NTT,WIP2	.	+	22.5	20.03	1.12325
chr5	971107	971627	AT5G03710_	.	+	6.37	5.67	1.12324
chr5	9812988	9815420	AT5G27710_	.	+	64.4	57.34	1.1231
chr1	9551451	9554139	AT1G27500_KLCR3	.	-	20.08	17.88	1.12297
chr5	4050691	4053606	AT5G12840_ATHAP2A,AtNFYA1,EMB2220,HAP2A,NF-YA1,NFYA1	.	-	76.34	67.98	1.12296
chr1	10936923	10938099	AT1G30800_	.	+	20.64	18.38	1.12289
chr5	1544007	1547164	AT5G05200_	.	-	65.44	58.28	1.12283
chr2	14392551	14403317	AT2G34110_	.	+	28.3	25.21	1.12252
chr3	19326333	19328323	AT3G52115_ATCOM1,ATGR1,COM1,GR1	.	+	18.23	16.24	1.12246
chr5	18260441	18264346	AT5G45150_RTL3	.	+	15.95	14.21	1.12236
chr5	25977621	25978417	AT5G65040_	.	-	19.62	17.48	1.12236
chr2	7533480	7535942	AT2G17320_	.	-	53.56	47.72	1.12235
chr3	21901570	21903284	AT3G59250_	.	-	16.05	14.3	1.12229
chr3	18362443	18364913	AT3G49530_ANAC062,NAC062,NTL6	.	-	62.33	55.54	1.12223
chr3	9214339	9216490	AT3G25410_	.	-	77.5	69.06	1.12219
chr1	17324318	17324911	AT1G47265_	.	+	10.83	9.65	1.12215
chr3	9031096	9033796	AT3G24740_	.	+	61.21	54.55	1.12207
chr5	1323636	1325627	AT5G04600_	.	+	75.17	67	1.12192
chr4	8231017	8233491	AT4G14300_	.	+	78.41	69.89	1.12189
chr5	3353507	3355124	AT5G10610_CYP81K1	.	+	68.88	61.4	1.1218
chr1	25376751	25379144	AT1G67710_ARR11	.	-	16.67	14.86	1.12172
chr2	1531148	1533737	AT2G04400_	.	+	55.68	49.64	1.12165
chr2	8557729	8559741	AT2G19830_SNF7.2,VPS32	.	-	65.66	58.54	1.12161
chr1	3567905	3570838	AT1G10740_	.	-	51.65	46.05	1.12158
chr3	2476367	2478254	AT3G07760_	.	+	73	65.09	1.12151
chr4	13177409	13183631	AT4G25960_ABCB2,PGP2	.	+	17.65	15.74	1.12127
chr3	3868588	3871728	AT3G12140_AtEML1,EML1	.	-	77.51	69.13	1.1212
chr1	5909249	5911693	AT1G17270_	.	-	56.42	50.32	1.1212
chr4	17516187	17516857	AT4G37225_	.	-	20.25	18.06	1.1212
chr5	4040937	4041128	AT5G12450_	.	+	22.11	19.72	1.12114
chr5	620094	621179	AT5G02750_SGR9	.	+	20.54	18.32	1.12111
chr1	6052936	6056664	AT1G17600_	.	-	20.65	18.42	1.121
chr4	7647389	7649831	AT4G13130_	.	+	12.98	11.58	1.12079
chr5	20555120	20555758	AT5G50470_NF-YC7	.	-	24.42	21.79	1.12064
chr2	18894074	18898528	AT2G45910_	.	+	70.68	63.09	1.12029
chr4	11431105	11433322	AT4G21470_ATFMN/FHY,FMN/FHY	.	+	59.48	53.1	1.12013
chr3	1827980	1830200	AT3G06060_TSC10A	.	-	88.65	79.15	1.12001
chr1	8203962	8204255	AT1G23145_RALFL2	.	+	23.05	20.58	1.11996
chr1	4298889	4299475	AT1G12630_	.	+	22.8	20.36	1.11978
chr2	17429294	17436174	AT2G41790_	.	-	55.53	49.59	1.11976
chr1	7232006	7233566	AT1G20810_	.	+	73.28	65.45	1.11962
chr5	16626337	16630783	AT5G41580_	.	-	37.34	33.35	1.1196
chr3	22337793	22339446	AT3G60440_	.	+	56.95	50.87	1.1195
chr3	23087017	23089206	AT3G62390_TBL6	.	-	37.38	33.39	1.11946
chr5	14618107	14620282	AT5G37000_	.	+	22.21	19.84	1.1194
chr4	12332560	12333804	AT4G23670_	.	-	19.31	17.25	1.11935
chr4	6780522	6784440	AT4G11130_RDR2,SMD1	.	+	22.32	19.94	1.1193
chr4	11763625	11764328	AT4G22235_	.	+	23.17	20.7	1.11927
chr3	11148215	11151560	AT3G29180_	.	+	24.4	21.8	1.11921
chr5	14981638	14984606	AT5G37720_ALY4,DIP2	.	-	69.39	62	1.11917
chr3	22650159	22651488	AT3G61190_BAP1	.	-	16.72	14.94	1.11906
chr2	11849789	11851363	AT2G27800_	.	-	63.93	57.13	1.11901
chr4	6523255	6528173	AT4G10570_UBP9	.	-	52.37	46.8	1.11899
chr1	25785506	25786924	AT1G68680_	.	+	81.18	72.55	1.11894
chr2	16912845	16915177	AT2G40490_HEME2	.	+	53.71	48.01	1.1187
chr2	7162976	7165323	AT2G16530_	.	-	37.42	33.45	1.11865
chr2	15158561	15159639	AT2G36090_	.	+	31.11	27.81	1.11862
chr4	17703381	17704510	AT4G37682_	.	+	73.76	65.94	1.11857
chr4	12392370	12393982	AT4G23810_ATWRKY53,WRKY53	.	-	19.62	17.54	1.11852
chr5	15456595	15460767	AT5G38600_	.	+	55.69	49.79	1.11847
chr3	46718	48296	AT3G01142_	.	+	74.49	66.6	1.11845
chr2	12877838	12879649	AT2G30160_	.	+	90.46	80.88	1.11843
chr3	3575844	3575917	AT3G11395_	.	+	13.41	11.99	1.11833
chr5	6055028	6058368	AT5G18290_SIP1;2,SIP1B	.	-	15.02	13.43	1.1183
chr1	30213705	30216861	AT1G80370_CYCA2;4	.	+	25.63	22.92	1.11819
chr3	1635200	1640348	AT3G05630_PDLZ2,PLDP2,PLDZETA2	.	+	14.94	13.36	1.11818
chr1	813471	816749	AT1G03310_AtBE2,ATISA2,BE2,DBE1,ISA2	.	+	48.07	42.99	1.11814
chr5	4420069	4423033	AT5G13700_APAO,ATPAO1,PAO1	.	-	17.81	15.93	1.11794
chr5	26857154	26861119	AT5G67320_HOS15	.	+	53.83	48.15	1.11794
chr5	6357383	6359124	AT5G19030_	.	-	64.37	57.58	1.1179
chr2	19615777	19616904	AT2G47920_NET3C	.	+	22.75	20.35	1.11788
chr1	6248793	6254039	AT1G18160_	.	+	53.71	48.05	1.11777
chr5	26203968	26206184	AT5G65570_	.	+	59.81	53.51	1.11771
chr5	16472764	16477013	AT5G41150_ATRAD1,RAD1,UVH1	.	-	50.98	45.61	1.11771
chr5	2876753	2878700	AT5G09260_VPS20.2	.	+	54.6	48.85	1.11768
chr1	8143404	8145070	AT1G23000_	.	+	21.18	18.95	1.11762
chr3	4180573	4183975	AT3G13060_ECT5	.	+	61.38	54.92	1.1176
chr5	5777595	5782150	AT5G17530_	.	+	33.26	29.76	1.11757
chr5	405895	408220	AT5G02070_	.	-	15.39	13.77	1.11756
chr3	8078820	8081051	AT3G22830_AT-HSFA6B,HSFA6B	.	+	18.35	16.42	1.11747
chr5	2616345	2617881	AT5G08139_	.	+	91.71	82.07	1.11745
chr5	16241009	16243381	AT5G40550_AtSGF29b,SGF29b	.	+	40.82	36.53	1.11741
chr2	8799187	8801973	AT2G20400_	.	+	46.52	41.64	1.11717
chr4	17187528	17192317	AT4G36380_ROT3	.	-	12.29	11	1.11717
chr1	4375515	4378514	AT1G12840_ATVHA-C,DET3	.	+	82.42	73.78	1.11709
chr1	21861382	21866190	AT1G59520_CW7	.	+	56.01	50.14	1.11705
chr1	21437602	21438889	AT1G57943_ATPUP17,PUP17	.	-	16.31	14.6	1.11704
chr5	2560394	2563109	AT5G07990_CYP75B1,D501,TT7	.	+	16.41	14.69	1.11701
chr3	7874145	7878468	AT3G22270_	.	+	70.45	63.07	1.11699
chr5	4726641	4728746	AT5G14660_ATDEF2,DEF2,PDF1B	.	-	74.03	66.28	1.11691
chr3	3339392	3346340	AT3G10690_GYRA	.	-	29.54	26.45	1.11678
chr5	16507533	16507604	AT5G41265_	.	-	10.52	9.42	1.11665
chr2	15917093	15921170	AT2G38040_CAC3	.	+	51.98	46.55	1.11662
chr5	4318524	4319924	AT5G13470_	.	+	71.35	63.9	1.11657
chr1	6395864	6398239	AT1G18580_GAUT11	.	+	66.13	59.23	1.11648
chr5	25721933	25722646	AT5G64310_AGP1,ATAGP1	.	+	23.96	21.46	1.11644
chr3	23298911	23299111	AT3G63052_	.	-	8.91	7.98	1.1164
chr5	6212802	6215782	AT5G18640_	.	+	65.24	58.44	1.11634
chr4	9267260	9269178	AT4G16430_JAM3	.	+	81.77	73.25	1.1163
chr3	7409442	7412225	AT3G21140_	.	-	56.25	50.39	1.11627
chr3	225916	228623	AT3G01590_	.	+	58.27	52.2	1.11626
chr3	2057617	2060483	AT3G06600_	.	-	21.03	18.84	1.11618
chr2	9362312	9363203	AT2G22000_PROPEP6	.	+	13.73	12.3	1.11617
chr1	17065252	17069262	AT1G45130_AtBGAL5,BGAL5	.	+	16.71	14.97	1.11615
chr5	2869362	2871190	AT5G09225_	.	-	71.2	63.79	1.11614
chr1	25442404	25443019	AT1G67856_	.	+	19.9	17.83	1.11603
chr1	12120886	12123576	AT1G33420_	.	-	47.93	42.95	1.11592
chr1	6504806	6506424	AT1G18850_	.	-	62.47	55.98	1.11591
chr4	14323361	14325328	AT4G29080_IAA27,PAP2	.	-	21	18.82	1.11577
chr5	2196434	2198114	AT5G07070_CIPK2,SnRK3.2	.	-	52.91	47.42	1.11575
chr4	7342956	7343590	AT4G12410_SAUR35	.	-	11.08	9.93	1.11569
chr2	11343801	11345402	AT2G26680_	.	-	73.78	66.13	1.11566
chr2	19485875	19486553	AT2G47485_	.	+	22.66	20.31	1.11565
chr2	9960372	9963623	AT2G23390_	.	-	73.91	66.25	1.11561
chr5	9279309	9279611	AT5G26673_	.	+	22.19	19.89	1.11558
chr2	993756	996128	AT2G03270_	.	+	49.33	44.22	1.11553
chr5	20448370	20450881	AT5G50230_	.	-	62	55.58	1.11549
chr2	15031923	15033307	AT2G35760_	.	+	19.6	17.57	1.11547
chr1	30276481	30277059	AT1G80520_	.	+	29.09	26.08	1.11537
chr4	307431	310482	AT4G00740_QUA3	.	-	71.37	63.99	1.11531
chr5	24678662	24680944	AT5G61390_	.	-	47	42.14	1.1153
chr4	14034654	14041322	AT4G28370_FLY1	.	+	44.01	39.46	1.11528
chr1	17798431	17801987	AT1G48210_	.	+	44.81	40.18	1.1152
chr3	9463316	9464283	AT3G25870_	.	-	19.16	17.18	1.11518
chr4	13782515	13785112	AT4G27600_NARA5	.	-	78.27	70.19	1.1151
chr2	12150380	12150502	AT2G28401_	.	+	17.14	15.37	1.11508
chr4	13581401	13585155	AT4G27060_CN,SPR2,TOR1	.	-	45.46	40.77	1.11501
chr5	23670395	23672877	AT5G58560_FOLK	.	+	72.23	64.78	1.11499
chr5	9096460	9099185	AT5G26030_ATFC-I,FC-I,FC1	.	+	66.07	59.26	1.1149
chr4	8890879	8892526	AT4G15563_	.	+	21.34	19.14	1.11488
chr1	6361629	6363007	AT1G18480_AtSLP2,SLP2	.	+	93.66	84.01	1.11485
chr3	7974762	7977590	AT3G22520_	.	+	59.3	53.19	1.11485
chr5	3324978	3326933	AT5G10530_LecRK-IX.1	.	-	21.16	18.98	1.1148
chr3	17213069	17215612	AT3G46730_	.	-	10.48	9.4	1.11477
chr1	19709275	19711052	AT1G52920_GCR2,GPCR	.	-	28.46	25.53	1.11472
chr2	12677279	12677461	AT2G29654_	.	-	14.57	13.07	1.11468
chr5	6241134	6243479	AT5G18710_	.	+	16.32	14.64	1.11468
chr2	17910888	17914870	AT2G43070_ATSPPL3,SPPL3	.	-	63.18	56.68	1.11466
chr5	14141898	14143241	AT5G36002_	.	-	50.36	45.18	1.11463
chr5	304897	305696	AT5G01790_	.	-	18.87	16.93	1.11452
chr3	19328711	19331970	AT3G52120_	.	+	63.26	56.76	1.1145
chr2	7754210	7755604	AT2G17830_	.	+	60.85	54.6	1.11445
chr1	28475707	28477802	AT1G75840_ARAC5,ATGP3,ATROP4,ROP4	.	+	59.5	53.39	1.11442
chr2	6391172	6391477	AT2G14870_	.	+	19	17.05	1.1143
chr4	6564279	6566504	AT4G10620_	.	+	63.08	56.61	1.11427
chr4	8553643	8561664	AT4G14970_	.	+	14.91	13.38	1.11426
chr2	5114868	5118747	AT2G12550_NUB1	.	+	38.9	34.91	1.11426
chr4	6454703	6458089	AT4G10430_	.	-	78.65	70.59	1.11416
chr1	4861266	4864094	AT1G14230_	.	+	54.1	48.56	1.11406
chr5	654102	656561	AT5G02860_	.	+	73.93	66.36	1.11406
chr1	29764089	29768789	AT1G79120_	.	-	14.07	12.63	1.11392
chr2	18710961	18711548	AT2G45406_	.	-	10.16	9.12	1.11391
chr2	7363121	7363312	AT2G16955_	.	-	19.07	17.12	1.11384
chr3	21645547	21648368	AT3G58530_	.	+	55.67	49.98	1.11382
chr1	10089898	10089969	AT1G28730_	.	+	14.19	12.74	1.11373
chr4	12696538	12698218	AT4G24590_	.	+	80.86	72.61	1.11361
chr5	5027639	5030194	AT5G15490_UGD3	.	-	41.47	37.24	1.11356
chr5	24015394	24016610	AT5G59613_	.	-	85.95	77.19	1.11347
chr1	30308696	30310656	AT1G80630_	.	-	82.35	73.96	1.11342
chr5	3550520	3552207	AT5G11160_APT5	.	+	19.93	17.9	1.11334
chr4	5812488	5813396	AT4G09110_	.	+	13.45	12.08	1.11332
chr4	1374281	1376231	AT4G03100_	.	+	25.06	22.51	1.11323
chr5	16004281	16006740	AT5G39990_GlcAT14A	.	+	65.77	59.08	1.11322
chr2	7407123	7408270	AT2G17040_anac036,NAC036	.	+	19.56	17.57	1.1132
chr5	2677052	2678678	AT5G08320_	.	+	83	74.56	1.11318
chr3	10470401	10471388	AT3G28140_	.	+	146.16	131.31	1.11308
chr2	14258509	14260739	AT2G33710_	.	-	22.64	20.34	1.11302
chr1	4433640	4436075	AT1G12990_	.	+	59.87	53.79	1.11301
chr5	18816585	18819348	AT5G46390_	.	+	58.4	52.47	1.113
chr3	2580077	2582129	AT3G08505_	.	-	64.27	57.75	1.11288
chr2	18733275	18734127	AT2G45450_ZPR1	.	-	20.11	18.07	1.11283
chr4	418437	421694	AT4G00970_CRK41	.	+	17.55	15.77	1.1128
chr1	5458535	5460333	AT1G15880_atgos11,GOS11	.	-	77.1	69.29	1.1127
chr1	29004357	29005091	AT1G77200_	.	-	32.28	29.01	1.11268
chr5	9375183	9377125	AT5G26610_	.	+	63.2	56.81	1.11246
chr4	7871057	7876963	AT4G13550_	.	-	59.26	53.27	1.11242
chr2	1152467	1154291	AT2G03780_	.	-	81.53	73.29	1.11241
chr1	18205934	18206701	AT1G49220_	.	+	21.96	19.74	1.11241
chr1	23915598	23919783	AT1G64400_LACS3	.	-	14.05	12.63	1.11234
chr2	17084356	17087297	AT2G40940_ERS,ERS1	.	-	60.44	54.34	1.11224
chr1	19050344	19052094	AT1G51390_ATNFU1,NFU5	.	+	66.08	59.42	1.11206
chr1	29167764	29172867	AT1G77620_	.	-	29.47	26.5	1.11203
chr1	26559359	26560123	AT1G70470_	.	-	13.79	12.4	1.11201
chr1	28187447	28189725	AT1G75090_	.	-	17.48	15.72	1.11189
chr4	9482370	9482507	AT4G16855_	.	+	20.57	18.5	1.11183
chr4	10237572	10238836	AT4G18593_	.	+	50.91	45.79	1.11179
chr1	24167202	24171502	AT1G65060_4CL3	.	-	19.2	17.27	1.11169
chr3	23007083	23008749	AT3G62140_	.	+	54.88	49.37	1.11158
chr2	16168837	16171918	AT2G38670_PECT1	.	+	63.17	56.83	1.11154
chr2	8622215	8622736	AT2G19960_	.	+	11.55	10.39	1.11154
chr5	19593217	19594441	AT5G48350_	.	+	12.85	11.56	1.1115
chr1	4478491	4480327	AT1G13140_CYP86C3	.	-	21.73	19.55	1.11145
chr2	10901291	10902531	AT2G25610_	.	-	86.01	77.39	1.11137
chr3	21442748	21444312	AT3G57910_	.	+	65.87	59.27	1.11134
chr2	11293769	11295806	AT2G26560_PLA,PLA2A,PLAII,PLP2,PLP2	.	-	18.36	16.52	1.11131
chr1	5928	8737	AT1G01020_ARV1	.	-	41.74	37.56	1.11126
chr3	6747370	6749307	AT3G19460_	.	+	54.64	49.17	1.11122
chr5	463158	465246	AT5G02260_ATEXP9,ATEXPA9,ATHEXP,EXP9,EXPA9	.	+	14.78	13.3	1.11119
chr2	15999926	16003169	AT2G38185_APD1	.	+	52.96	47.66	1.11118
chr1	22585838	22588969	AT1G61250_AtSCAMP1,SC3,SCAMP1	.	+	57.79	52.01	1.11111
chr2	8627699	8628220	AT2G19980_	.	-	22.39	20.15	1.11111
chr3	5592582	5595717	AT3G16460_JAL34	.	+	17.61	15.85	1.11097
chr1	21237888	21240558	AT1G56660_	.	+	17.01	15.31	1.11097
chr3	3164075	3166038	AT3G10230_AtLCY,LYC	.	-	76.76	69.1	1.11084
chr5	25854140	25855484	AT5G64680_	.	+	59.56	53.62	1.11076
chr1	4731056	4733707	AT1G13800_FAC19	.	-	31.08	27.98	1.11075
chr5	26556333	26559427	AT5G66540_	.	-	58.91	53.04	1.11065
chr4	6719207	6722220	AT4G10970_	.	-	60.59	54.56	1.1105
chr5	5246120	5247431	AT5G16060_	.	+	49.84	44.88	1.11049
chr5	17233599	17234132	AT5G42957_	.	-	12.36	11.13	1.11041
chr5	14273384	14277026	AT5G36230_	.	+	60.24	54.25	1.11039
chr5	889566	894167	AT5G03540_ATEXO70A1,EXO70A1	.	+	62.76	56.52	1.11038
chr2	10241964	10243614	AT2G24090_PRPL35	.	+	87.37	78.69	1.11029
chr1	4049896	4053835	AT1G12000_	.	-	36.86	33.2	1.11021
chr3	1503758	1505654	AT3G05280_	.	-	70.53	63.53	1.11017
chr1	29401759	29403946	AT1G78140_	.	-	56.86	51.22	1.11009
chr1	11858211	11859292	AT1G32760_	.	+	72	64.86	1.11007
chr5	19758881	19761721	AT5G48720_XRI,XRI1	.	+	39.93	35.97	1.11006
chr2	16869334	16873258	AT2G40400_	.	+	40.04	36.07	1.11003
chr5	15530015	15531522	AT5G38780_	.	+	21.1	19.01	1.10988
chr5	15891579	15891873	AT5G39693_MIR869A	.	-	25.66	23.12	1.10981
chr5	3032375	3034543	AT5G09760_	.	+	23.54	21.21	1.1098
chr4	9989476	9989613	AT4G17998_	.	-	7.48	6.74	1.10963
chr5	4947667	4950340	AT5G15240_	.	+	18.21	16.41	1.10962
chr5	7079975	7081769	AT5G20870_	.	-	21.67	19.53	1.10952
chr2	16188047	16192266	AT2G38720_MAP65-5	.	+	16.01	14.43	1.10942
chr1	10632821	10635471	AT1G30220_ATINT2,INT2	.	-	16.44	14.82	1.10924
chr4	4949563	4949745	AT4G08073_	.	+	9.74	8.78	1.10922
chr4	1376306	1379420	AT4G03110_AtBRN1,AtRBP-DR1,BRN1,RBP-DR1	.	-	37.94	34.21	1.109
chr2	6918039	6920319	AT2G15880_	.	-	17.49	15.77	1.109
chr3	808745	809158	AT3G03400_	.	-	19.22	17.33	1.109
chr2	7334226	7339167	AT2G16920_PFU2,UBC23	.	-	56.08	50.57	1.10894
chr4	1870422	1872387	AT4G03930_	.	+	16.08	14.5	1.10889
chr5	6968690	6972995	AT5G20610_	.	+	47.46	42.8	1.10885
chr2	6542256	6543947	AT2G15090_KCS8	.	+	19.45	17.54	1.10883
chr5	13824705	13826391	AT5G35620_EIF(ISO)4E,EIF4E2,eIFiso4E,LSP,LSP1	.	-	84.15	75.89	1.10883
chr2	14768724	14775035	AT2G35050_	.	+	57.29	51.68	1.10853
chr3	20520930	20523014	AT3G55360_ATTSC13,CER10,ECR,TSC13	.	-	62.96	56.8	1.10843
chr5	3341357	3342992	AT5G10570_	.	+	21.46	19.36	1.10842
chr1	21553621	21558056	AT1G58210_EMB1674,NET2A	.	+	26.37	23.79	1.1084
chr1	12074099	12076104	AT1G33290_	.	+	58.08	52.4	1.10838
chr5	9162969	9164685	AT5G26220_AtGGCT2;1,GGCT2;1	.	-	18.12	16.35	1.10819
chr5	16638579	16639863	AT5G41612_	.	+	92.66	83.62	1.1081
chr1	3878550	3880361	AT1G11545_XTH8	.	-	20.29	18.31	1.10808
chr5	20892643	20897817	AT5G51450_RIN3	.	+	55.82	50.38	1.10796
chr1	4747265	4748642	AT1G13870_AtKTI12,DRL1	.	-	63.01	56.87	1.10795
chr5	8045844	8050175	AT5G23870_	.	-	14.81	13.37	1.10762
chr2	14458821	14458979	AT2G34238_	.	+	35.04	31.64	1.10742
chr5	24543360	24546269	AT5G60980_	.	+	57.94	52.32	1.1074
chr1	28017584	28020049	AT1G74560_NRP1	.	-	55.17	49.82	1.10737
chr5	19166902	19169026	AT5G47200_ATRAB1A,ATRABD2B,RAB1A	.	+	71.48	64.55	1.10734
chr2	17833765	17835113	AT2G42860_	.	+	22.38	20.21	1.10732
chr4	14166269	14166928	AT4G28703_	.	+	18.98	17.14	1.10729
chr4	1446681	1447718	AT4G03298_	.	+	16.52	14.92	1.10717
chr1	19149761	19151852	AT1G51640_ATEXO70G2,EXO70G2	.	-	35.02	31.63	1.10714
chr1	20630065	20632973	AT1G55310_At-SCL33,ATSCL33,SCL33,SR33	.	+	68.83	62.17	1.10711
chr4	7008603	7009796	AT4G11590_	.	+	17.26	15.59	1.10705
chr1	18291043	18295825	AT1G49430_LACS2,LRD2	.	+	14.89	13.45	1.10698
chr3	15664371	15666460	AT3G43810_AtCAM7,CAM7,ZBF3	.	-	69.13	62.45	1.10695
chr2	9406263	9414518	AT2G22125_CSI1,POM2	.	+	49.63	44.84	1.1068
chr1	28196857	28198802	AT1G75120_RRA1	.	-	16.79	15.17	1.10672
chr3	9305922	9306766	AT3G25597_	.	+	11.61	10.49	1.10667
chr2	8965756	8966867	AT2G20825_ULT2	.	-	21.5	19.43	1.10648
chr5	2848506	2851428	AT5G08740_NDC1	.	-	53.63	48.47	1.10644
chr2	13932904	13934949	AT2G32840_	.	-	60.19	54.4	1.10641
chr1	14006147	14006341	AT1G36942_	.	-	13.51	12.21	1.10638
chr1	19156504	19158749	AT1G51670_	.	+	20.38	18.42	1.10635
chr5	4929560	4929633	AT5G15175_	.	+	19.04	17.21	1.10627
chr1	6846369	6848103	AT1G19800_ABCI14,TGD1	.	+	58.05	52.48	1.10612
chr4	9361984	9366748	AT4G16630_	.	-	47.01	42.5	1.10609
chr2	1869877	1873812	AT2G05170_ATVPS11,VPS11	.	+	78.14	70.65	1.106
chr1	30389538	30390557	AT1G80865_	.	+	26.81	24.24	1.10598
chr2	11567436	11571856	AT2G27090_	.	-	50.71	45.85	1.10597
chr4	2134060	2136249	AT4G04370_	.	-	62.95	56.92	1.10592
chr5	25220147	25223789	AT5G62810_ATPEX14,PED2,PEX14	.	+	61.5	55.61	1.1059
chr5	14812575	14816628	AT5G37370_ATSRL1	.	-	67.81	61.32	1.10582
chr3	85601	87858	AT3G01280_ATVDAC1,VDAC1	.	+	77.91	70.46	1.10572
chr3	3896531	3899019	AT3G12220_scpl16	.	-	12.55	11.35	1.10563
chr4	7242165	7242924	AT4G12090_	.	-	12.55	11.35	1.10563
chr5	2524778	2529330	AT5G07920_ATDGK1,DGK1	.	-	39.14	35.4	1.10562
chr4	10953547	10954974	AT4G20280_TAF11	.	+	89.29	80.76	1.10561
chr1	11881810	11885843	AT1G32810_	.	+	45.05	40.75	1.1055
chr1	8071935	8074357	AT1G22800_	.	+	53.54	48.43	1.10549
chr1	2416265	2420757	AT1G07810_ACA3,ATECA1,ECA1	.	+	38.58	34.9	1.10541
chr2	14396016	14399297	AT2G34090_MEE18	.	-	49.52	44.8	1.10533
chr5	5532846	5535252	AT5G16830_ATPEP12,ATSYP21,PEP12,PEP12P,SYP21	.	-	66.74	60.38	1.10532
chr4	13987602	13990450	AT4G28200_	.	-	70.73	63.99	1.10531
chr4	12823496	12826200	AT4G24940_AT-SAE1-1,ATSAE1A,SAE1A	.	+	57.31	51.85	1.10528
chr1	29782273	29782622	AT1G79170_	.	+	33.09	29.94	1.10518
chr1	16228208	16231233	AT1G43130_LCV2	.	-	52.11	47.15	1.10517
chr1	1438152	1441417	AT1G05030_	.	-	54.65	49.45	1.10514
chr2	18099238	18103345	AT2G43650_EMB2777	.	+	45.43	41.11	1.10506
chr4	7385802	7386810	AT4G12450_	.	-	15.56	14.08	1.10504
chr1	29564249	29566375	AT1G78590_ATNADK-3,NADK3	.	+	62.49	56.55	1.10502
chr1	6037464	6038692	AT1G17560_HLL	.	-	32.62	29.52	1.10498
chr1	8955249	8957978	AT1G25500_	.	-	47.08	42.61	1.10488
chr1	19840376	19843403	AT1G53200_	.	-	53.84	48.73	1.10484
chr1	7058194	7058310	AT1G20375_MIR394A	.	+	17.81	16.12	1.10477
chr1	20966528	20967144	AT1G56060_	.	-	12.96	11.73	1.10477
chr5	2975548	2978750	AT5G09590_HSC70-5,MTHSC70-2	.	+	60.11	54.41	1.10474
chr1	7712211	7712513	AT1G21928_	.	-	9.38	8.49	1.10471
chr1	20137712	20139637	AT1G53920_GLIP5	.	+	15.08	13.65	1.10469
chr3	1824376	1825663	AT3G06040_	.	-	74.54	67.48	1.10461
chr2	11489004	11491751	AT2G26920_	.	+	54.75	49.57	1.10448
chr1	20580274	20581975	AT1G55170_	.	+	79.39	71.9	1.10416
chr5	16636130	16637693	AT5G41600_BTI3,RTNLB4	.	+	97.1	87.95	1.10402
chr4	12090690	12092077	AT4G23070_ATRBL7,RBL7	.	-	17.29	15.66	1.10402
chr3	1168837	1169205	AT3G04410_	.	+	20.69	18.74	1.104
chr3	8672774	8674881	AT3G24000_	.	+	36.41	32.98	1.10397
chr1	24468932	24472329	AT1G65790_ARK1,RK1	.	+	15.07	13.65	1.10395
chr5	21822486	21826451	AT5G53760_ATMLO11,MLO11	.	+	35.36	32.03	1.10393
chr4	13262236	13266966	AT4G26190_	.	-	39.61	35.88	1.10393
chr1	28266259	28268412	AT1G75330_OTC	.	-	66.91	60.61	1.10393
chr4	5463885	5466671	AT4G08590_ORL1,ORL1,ORTHL,VIM6	.	-	20.07	18.18	1.1039
chr1	25269626	25271861	AT1G67460_	.	-	14.23	12.89	1.10388
chr1	29516989	29517933	AT1G78450_	.	-	25.4	23.01	1.10382
chr1	25198182	25203126	AT1G67310_	.	-	66.8	60.52	1.10375
chr4	14802950	14804358	AT4G30220_RUXF	.	-	70.64	64	1.10373
chr2	18919316	18921511	AT2G45990_	.	+	68.63	62.18	1.10371
chr5	16777283	16777438	AT5G41908_	.	+	22.67	20.54	1.10365
chr5	8618567	8619465	AT5G25020_	.	+	16.72	15.15	1.10356
chr5	3201518	3204709	AT5G10200_	.	+	27.59	25	1.10356
chr1	10097718	10097789	AT1G28840_	.	+	26.74	24.23	1.10355
chr4	17885340	17886890	AT4G38092_	.	+	14.06	12.74	1.10353
chr3	4389256	4392801	AT3G13470_Cpn60beta2	.	+	53	48.03	1.10346
chr1	19603147	19603662	AT1G52618_	.	+	27.73	25.13	1.10342
chr4	6309393	6310869	AT4G10110_	.	-	69.48	62.98	1.10319
chr5	6595702	6597889	AT5G19540_	.	+	81.86	74.21	1.10307
chr2	11899205	11904007	AT2G27950_	.	-	59	53.49	1.10299
chr2	14704632	14706191	AT2G34850_MEE25	.	-	13.5	12.24	1.10286
chr2	13178840	13181931	AT2G30970_ASP1	.	+	48.35	43.84	1.10285
chr4	9660985	9663774	AT4G17230_SCL13	.	-	47.57	43.14	1.10267
chr1	28403466	28407051	AT1G75640_	.	-	23.19	21.03	1.10266
chr3	219582	221879	AT3G01560_	.	+	69.06	62.64	1.10247
chr2	11115905	11118208	AT2G26100_	.	-	61.53	55.81	1.10247
chr3	1616102	1617339	AT3G05570_	.	-	66.22	60.07	1.10236
chr5	21508385	21509609	AT5G53045_	.	-	60.2	54.61	1.10234
chr3	11284395	11285402	AT3G29385_	.	-	14.97	13.58	1.10228
chr5	24367198	24369790	AT5G60620_GPAT9	.	+	67.37	61.12	1.10224
chr5	8609081	8609528	AT5G24980_	.	+	110.72	100.45	1.10223
chr4	1149248	1151346	AT4G02620_	.	-	79.3	71.95	1.10214
chr3	17051955	17055514	AT3G46370_	.	+	17.04	15.46	1.10213
chr1	22366701	22368714	AT1G60770_	.	-	60.33	54.74	1.1021
chr4	8178330	8183515	AT4G14180_AtPRD1,PRD1	.	+	19.43	17.63	1.10204
chr4	8986615	8988452	AT4G15802_AtHSBP,HSBP	.	-	52.81	47.92	1.10202
chr1	7265823	7267323	AT1G20890_	.	-	54.67	49.61	1.10198
chr1	2354354	2356227	AT1G07640_OBP2,URP3	.	-	19.41	17.62	1.10153
chr4	10027480	10029899	AT4G18060_	.	-	55.61	50.49	1.10139
chr1	28253890	28255173	AT1G75290_	.	+	20.85	18.93	1.10137
chr1	278615	282891	AT1G01770_	.	+	49.76	45.18	1.10135
chr2	16470025	16471246	AT2G39445_	.	-	73.8	67.01	1.10131
chr2	14139798	14143118	AT2G33360_	.	+	45.54	41.35	1.10131
chr1	27575493	27577275	AT1G73350_	.	-	67.31	61.12	1.10126
chr3	19164063	19165247	AT3G51660_	.	-	15.45	14.03	1.10114
chr4	7196547	7197106	AT4G12005_	.	+	41.39	37.59	1.10106
chr5	26456285	26459631	AT5G66210_CPK28	.	-	60.26	54.73	1.10102
chr2	6644281	6645533	AT2G15292_	.	-	70.64	64.16	1.10098
chr3	4613506	4614848	AT3G13970_APG12,APG12B,ATG12B	.	-	66.84	60.71	1.10096
chr3	22932496	22933362	AT3G61920_	.	-	21.16	19.22	1.10088
chr2	12043482	12046537	AT2G28250_NCRK	.	+	13.97	12.69	1.10079
chr1	22915745	22917330	AT1G62010_	.	+	64.54	58.63	1.10078
chr2	12980507	12985043	AT2G30470_HSI2,VAL1	.	-	54.19	49.23	1.10073
chr5	4568509	4570947	AT5G14170_CHC1	.	-	52.24	47.46	1.1007
chr3	2737537	2740530	AT3G08970_ATERDJ3A,TMS1	.	+	18.03	16.38	1.10067
chr3	4235126	4235724	AT3G13175_	.	-	21.31	19.36	1.10067
chr2	11217439	11220507	AT2G26350_ATPEX10,PEX10	.	-	63.21	57.43	1.10063
chr4	15602721	15605400	AT4G32320_APX6	.	+	60.61	55.07	1.10058
chr2	10340816	10343736	AT2G24300_	.	+	16.3	14.81	1.10054
chr5	1129852	1138442	AT5G04140_FD-GOGAT,GLS1,GLU1,GLUS	.	+	53.01	48.17	1.10046
chr1	28415203	28416852	AT1G75670_	.	-	58.52	53.18	1.10039
chr5	18401908	18403800	AT5G45410_	.	-	53.83	48.92	1.10035
chr3	23257554	23260427	AT3G62910_APG3,AtcpRF1,cpRF1	.	-	52.19	47.43	1.10034
chr1	5840269	5841606	AT1G17080_	.	-	67.28	61.15	1.10023
chr3	1517419	1518554	AT3G05327_	.	-	12.95	11.77	1.10017
chr5	25987429	25991315	AT5G65060_AGL70,FCL3,MAF3	.	+	55.73	50.66	1.10006
chr1	23699369	23700967	AT1G63855_	.	-	61.6	56	1.09998
chr5	526592	529839	AT5G02430_	.	+	33.23	30.21	1.09993
chr1	26122139	26123421	AT1G69490_ANAC029,ATNAP,NAP	.	+	20.14	18.31	1.09989
chr5	16202247	16202932	AT5G40460_	.	+	17.61	16.01	1.09988
chr5	14141641	14143436	AT5G36001_	.	+	41.41	37.65	1.09984
chr4	15885520	15886980	AT4G32915_	.	+	59.04	53.68	1.09983
chr3	1220229	1220301	AT3G04525_	.	+	12.33	11.21	1.09982
chr3	484491	485614	AT3G02370_	.	+	85.83	78.04	1.09981
chr1	11142714	11144633	AT1G31180_ATIMD3,IMD3,IPMDH1	.	-	59.84	54.41	1.09978
chr5	5283550	5286293	AT5G16190_ATCSLA11,CSLA11	.	-	13.67	12.43	1.09968
chr3	270229	272976	AT3G01750_	.	+	20.88	18.99	1.09947
chr1	1324923	1324960	AT1G04720_	.	+	20.46	18.61	1.09936
chr3	4657046	4657601	AT3G14060_	.	-	25.49	23.19	1.09914
chr5	5071621	5072492	AT5G15581_	.	+	22.84	20.78	1.09909
chr1	28296919	28299686	AT1G75400_	.	+	74.54	67.82	1.09907
chr3	19246984	19249124	AT3G51880_AtHMGB1,HMGB1,NFD1	.	-	56.41	51.33	1.09895
chr1	30272849	30274793	AT1G80510_	.	+	64.28	58.51	1.0986
chr1	19018979	19021804	AT1G51310_	.	-	58.51	53.26	1.09855
chr5	6660821	6662347	AT5G19700_	.	-	27.19	24.75	1.09855
chr1	3766754	3768294	AT1G11240_	.	-	68.37	62.24	1.09847
chr5	20793794	20795399	AT5G51170_	.	-	70.85	64.5	1.09843
chr3	7319848	7321054	AT3G20890_	.	+	86.59	78.83	1.09843
chr3	1871688	1873771	AT3G06180_	.	+	107.48	97.85	1.09841
chr5	24744947	24747524	AT5G61540_	.	+	58.04	52.84	1.09839
chr1	2052481	2055548	AT1G06700_	.	-	58.76	53.5	1.0983
chr3	5708925	5710579	AT3G16780_	.	+	56.75	51.67	1.0983
chr2	16918433	16919888	AT2G40510_	.	+	79.9	72.75	1.09827
chr3	2288892	2290505	AT3G07195_	.	+	20.45	18.62	1.09823
chr5	2985856	2987652	AT5G09630_	.	-	59.36	54.05	1.09822
chr1	29008939	29012096	AT1G77210_AtSTP14,STP14	.	-	19.23	17.51	1.09817
chr1	24515837	24518487	AT1G65900_	.	-	16.77	15.27	1.09817
chr1	29446985	29450515	AT1G78260_	.	+	18.23	16.6	1.09813
chr3	721291	723646	AT3G03130_	.	-	15.44	14.06	1.09808
chr5	23106302	23108795	AT5G57100_	.	-	43.1	39.25	1.09806
chr5	18462162	18465097	AT5G45550_MOB1-like	.	+	52.21	47.55	1.09798
chr5	21865268	21868948	AT5G53860_emb2737,EMB64	.	+	62.65	57.06	1.09795
chr1	17950569	17952694	AT1G48550_	.	-	40.68	37.05	1.09795
chr3	3954695	3955423	AT3G12460_	.	-	30.15	27.46	1.09793
chr3	5408797	5411143	AT3G15970_	.	-	45.64	41.57	1.09788
chr3	237239	239113	AT3G01630_	.	+	28.6	26.05	1.09785
chr4	15878722	15881041	AT4G32900_	.	-	59.64	54.33	1.09772
chr4	16606274	16608024	AT4G34840_ATMTAN2,ATMTN2,MTAN2,MTN2	.	+	46.62	42.47	1.09769
chr5	13484431	13487584	AT5G35220_AMOS1,EGY1	.	-	64.15	58.45	1.0975
chr1	28128470	28129745	AT1G74875_	.	-	17.1	15.58	1.0975
chr3	5464769	5465531	AT3G16120_	.	+	16.2	14.76	1.09749
chr5	18559116	18560842	AT5G45750_AtRABA1c,RABA1c	.	+	48.06	43.79	1.09749
chr2	1164957	1167029	AT2G03820_AtNMD3,NMD3	.	-	69.28	63.13	1.0974
chr1	20595969	20596498	AT1G55207_	.	-	16.33	14.88	1.09738
chr4	17867438	17869302	AT4G38040_	.	+	79.24	72.21	1.09734
chr1	11767504	11769898	AT1G32540_LOL1	.	+	13.86	12.63	1.09731
chr4	18525246	18527579	AT4G39950_CYP79B2	.	+	23.5	21.42	1.09706
chr1	7413050	7419643	AT1G21170_SEC5B	.	+	28.73	26.19	1.09695
chr4	15403020	15406493	AT4G31850_PGR3	.	+	43.14	39.33	1.09685
chr5	1751688	1754178	AT5G05820_	.	-	68.51	62.46	1.09685
chr3	6797485	6801740	AT3G19570_QWRF1,SCO3	.	+	45.07	41.09	1.09684
chr4	8190212	8195265	AT4G14210_PDE226,PDS,PDS3	.	-	55.5	50.6	1.09682
chr1	8938479	8940387	AT1G25450_CER60,KCS5	.	-	22.88	20.86	1.09679
chr3	9496102	9497271	AT3G25950_	.	+	29.47	26.87	1.09673
chr4	16108643	16110877	AT4G33490_	.	-	17.01	15.51	1.09665
chr1	12191312	12192849	AT1G33612_	.	+	19.62	17.89	1.09665
chr4	15153182	15155703	AT4G31170_	.	-	64.37	58.7	1.09658
chr3	12357396	12357599	AT3G30730_	.	-	17.14	15.63	1.09655
chr5	4129359	4132864	AT5G13020_AtEML3,EML3	.	-	68.68	62.64	1.09641
chr4	15908618	15910180	AT4G32960_	.	-	67.46	61.53	1.09636
chr1	19898928	19900931	AT1G53340_	.	-	19.22	17.53	1.09635
chr1	5465336	5469125	AT1G15910_FDM1,IDNL1,IDP1	.	+	42.33	38.61	1.09632
chr2	13135430	13136849	AT2G30840_	.	-	15.47	14.11	1.09632
chr4	12153956	12157091	AT4G23220_CRK14	.	-	15.94	14.54	1.09622
chr3	4521532	4524394	AT3G13772_AtTMN7,TMN7	.	-	65.62	59.86	1.09621
chr4	18332878	18334789	AT4G39410_ATWRKY13,WRKY13	.	-	18.46	16.84	1.09614
chr1	22636595	22636768	AT1G61353_	.	-	8.09	7.38	1.09608
chr4	14004485	14006970	AT4G28260_	.	+	78.09	71.25	1.09599
chr5	3435949	3439297	AT5G10900_	.	-	30.14	27.5	1.09597
chr4	14382839	14385375	AT4G29170_ATMND1	.	+	31.18	28.45	1.09592
chr1	1558844	1559903	AT1G05340_	.	-	11.76	10.73	1.0959
chr3	21506613	21507654	AT3G58070_GIS	.	-	27.76	25.33	1.0959
chr1	10035664	10036956	AT1G28540_	.	+	71.91	65.62	1.09584
chr5	21113361	21116197	AT5G51980_	.	-	71.11	64.89	1.09584
chr3	794906	797013	AT3G03360_	.	+	16.92	15.44	1.09579
chr1	3847243	3849162	AT1G11430_MORF9	.	+	93.12	84.99	1.09565
chr3	9862173	9862778	AT3G26800_	.	+	10.99	10.03	1.09562
chr3	4995597	4997693	AT3G14850_TBL41	.	+	16.73	15.27	1.09555
chr2	16196265	16198491	AT2G38750_ANNAT4,AtANN4	.	-	17.31	15.8	1.09551
chr2	12236615	12239124	AT2G28560_ATRAD51B,RAD51B	.	-	29.82	27.22	1.09548
chr4	485833	488007	AT4G01130_	.	+	18.35	16.75	1.09547
chr3	20845674	20848534	AT3G56190_ALPHA-SNAP2,ASNAP	.	-	69.54	63.48	1.09545
chr5	25415701	25417117	AT5G63470_NF-YC4	.	-	83.76	76.47	1.09532
chr5	23978556	23979478	AT5G59470_	.	+	84.82	77.44	1.09529
chr5	6749705	6751070	AT5G19980_GONST4	.	-	110.92	101.27	1.09528
chr2	18542213	18548591	AT2G44950_HUB1,RDO4	.	-	69.2	63.18	1.09527
chr5	15625578	15629802	AT5G39040_ABCB27,ALS1,AtALS1,ATTAP2,TAP2	.	+	48.4	44.19	1.09525
chr2	18901392	18902798	AT2G45930_	.	-	15.17	13.85	1.09524
chr5	915465	918485	AT5G03610_	.	+	15.77	14.4	1.09507
chr1	27308515	27312754	AT1G72520_ATLOX4,LOX4	.	+	18.55	16.94	1.09499
chr3	15993379	15995811	AT3G44320_AtNIT3,NIT3	.	+	16.38	14.96	1.09486
chr4	7467978	7470551	AT4G12650_	.	-	72.88	66.57	1.09477
chr4	14142130	14143969	AT4G28640_IAA11	.	+	68.89	62.93	1.09469
chr3	492118	494948	AT3G02410_ICME-LIKE2	.	-	17.91	16.36	1.09469
chr1	11037612	11040033	AT1G30960_	.	-	43.6	39.83	1.09463
chr1	11104301	11107763	AT1G31120_KUP10	.	-	38.63	35.29	1.09462
chr4	6453085	6454209	AT4G10420_	.	-	16.31	14.9	1.09457
chr2	13350422	13351464	AT2G31305_INH3	.	+	80.09	73.17	1.09456
chr3	10017476	10019090	AT3G27160_GHS1	.	+	85.59	78.2	1.09449
chr2	2348136	2352157	AT2G06025_	.	+	50.62	46.25	1.09447
chr5	26824236	26828171	AT5G67240_SDN3	.	-	46.12	42.14	1.09442
chr4	13833807	13836578	AT4G27730_ATOPT6,OPT6	.	-	28.05	25.63	1.09438
chr5	3247847	3250138	AT5G10330_ATHPA1,EMB2196,HISN6A,HPA1	.	-	6.95	6.35	1.09434
chr2	19428897	19431720	AT2G47330_	.	-	73.23	66.92	1.09428
chr1	22564495	22571907	AT1G61210_DWA3	.	+	56.88	51.98	1.09425
chr5	23004196	23008649	AT5G56870_BGAL4	.	+	15.44	14.11	1.09419
chr2	15401374	15401787	AT2G36724_	.	+	13.63	12.46	1.09383
chr5	20436180	20437726	AT5G50200_ATNRT3.1,NRT3.1,WR3	.	+	24.13	22.06	1.09379
chr3	23296572	23297225	AT3G63040_	.	-	20.05	18.33	1.09378
chr1	1334760	1336070	AT1G04760_ATVAMP726,VAMP726	.	+	25.8	23.59	1.09364
chr1	10015919	10018047	AT1G28490_ATSYP61,OSM1,SYP61	.	+	70.18	64.17	1.09364
chr4	8835495	8838676	AT4G15440_CYP74B2,HPL1	.	+	14.52	13.28	1.0933
chr5	3617058	3617129	AT5G11325_	.	+	4.56	4.17	1.0933
chr1	25915007	25917906	AT1G68920_	.	+	48.76	44.6	1.09325
chr3	19393819	19396403	AT3G52290_IQD3	.	+	31.18	28.52	1.09324
chr4	12708752	12712825	AT4G24620_PGI,PGI1	.	-	55.57	50.83	1.09323
chr3	1347646	1349202	AT3G04890_	.	+	67.55	61.79	1.0932
chr3	453421	457841	AT3G02280_AtTAH18,TAH18	.	+	36.94	33.79	1.0932
chr3	6174719	6178465	AT3G18040_MPK9	.	+	21.34	19.52	1.09319
chr1	22028509	22030207	AT1G59850_	.	-	17.12	15.66	1.09317
chr4	711192	712643	AT4G01670_	.	-	14.54	13.3	1.09316
chr1	23016683	23019279	AT1G62300_ATWRKY6,WRKY6	.	-	20.57	18.82	1.09294
chr2	152481	152642	AT2G01310_	.	-	13.87	12.69	1.09291
chr3	8097687	8100820	AT3G22880_ARLIM15,ATDMC1,DMC1	.	-	22.35	20.45	1.09286
chr5	815674	816658	AT5G03350_	.	-	19.78	18.1	1.09277
chr4	8174598	8175715	AT4G14165_	.	-	22.29	20.4	1.0926
chr4	9747344	9748892	AT4G17483_	.	-	18.4	16.84	1.09258
chr3	2931865	2934354	AT3G09550_	.	+	17.71	16.21	1.09248
chr5	1790231	1790833	AT5G05960_	.	+	16.77	15.35	1.09245
chr2	19663916	19664767	AT2G48075_	.	-	30.14	27.59	1.09239
chr4	10115418	10118599	AT4G18290_KAT2	.	+	13.48	12.34	1.09231
chr4	12280413	12286420	AT4G23540_	.	-	45.08	41.27	1.0923
chr1	3471456	3472672	AT1G10530_	.	-	18.46	16.9	1.09225
chr4	17123966	17127018	AT4G36190_	.	+	56.26	51.51	1.0922
chr3	46396	48296	AT3G01140_AtMYB106,MYB106,NOK	.	-	65.23	59.73	1.09207
chr2	12275319	12277245	AT2G28630_KCS12	.	-	20.4	18.68	1.09203
chr1	22814390	22815430	AT1G61790_OST3/6	.	+	148.86	136.32	1.09198
chr1	10422331	10424327	AT1G29760_	.	+	87.57	80.2	1.09188
chr5	8867797	8869821	AT5G25475_	.	-	31.96	29.27	1.09187
chr2	9110313	9112707	AT2G21280_ATSULA,GC1,SULA	.	-	69.44	63.6	1.09181
chr1	754371	756303	AT1G03140_	.	-	108.14	99.05	1.09176
chr4	8470381	8472187	AT4G14750_IQD19	.	+	16.9	15.48	1.09167
chr5	21941602	21942146	AT5G54067_	.	-	20.98	19.22	1.09152
chr5	14886193	14886979	AT5G37485_	.	-	21.82	19.99	1.0915
chr1	6532559	6538145	AT1G18910_	.	-	30.89	28.3	1.09149
chr4	17130246	17134656	AT4G36210_	.	+	64.85	59.43	1.09118
chr1	9182204	9184393	AT1G26570_ATUGD1,UGD1	.	+	26.81	24.57	1.09113
chr3	5307944	5309581	AT3G15660_ATGRX4,GRX4	.	-	68.63	62.9	1.09108
chr4	18063166	18065849	AT4G38650_	.	+	22.88	20.97	1.09104
chr3	22983138	22984513	AT3G62070_	.	-	21.33	19.55	1.091
chr1	2895166	2899384	AT1G09010_	.	-	40.57	37.19	1.09086
chr1	26938525	26939106	AT1G71520_	.	+	27.85	25.53	1.09084
chr1	7656399	7658634	AT1G21810_	.	-	17.29	15.85	1.09079
chr2	7481881	7485240	AT2G17200_DSK2,DSK2b	.	-	77.84	71.36	1.09079
chr5	25670930	25672463	AT5G64160_	.	+	69.74	63.94	1.0907
chr1	3407024	3412843	AT1G10390_	.	-	57.88	53.07	1.09062
chr5	2765642	2770282	AT5G08550_ILP1	.	-	55.39	50.79	1.09055
chr1	2498836	2501427	AT1G08050_	.	-	21.43	19.65	1.09054
chr2	10020652	10022864	AT2G23530_	.	-	17.34	15.9	1.09051
chr3	21041727	21042609	AT3G56825_U2.4	.	-	18.55	17.01	1.09048
chr5	6090954	6092545	AT5G18390_	.	+	93.76	85.98	1.09048
chr2	13726819	13731767	AT2G32320_	.	+	60.08	55.1	1.09036
chr4	13232595	13235879	AT4G26110_ATNAP1;1,NAP1;1	.	+	53.79	49.34	1.09017
chr5	8266790	8271205	AT5G24300_ATSS1,SS1	.	+	52.79	48.43	1.09001
chr5	19299782	19300499	AT5G47600_	.	-	26.43	24.25	1.08986
chr4	704407	706965	AT4G01650_	.	-	51.43	47.19	1.08983
chr3	5015426	5017805	AT3G14910_	.	+	58.73	53.89	1.0898
chr1	673306	676378	AT1G02970_ATWEE1,WEE1	.	+	24.4	22.39	1.08973
chr4	17049171	17050274	AT4G36040_DJC23,J11	.	-	29.54	27.11	1.0896
chr1	6649243	6650420	AT1G19240_	.	-	82.08	75.33	1.08959
chr2	19570049	19571034	AT2G47780_	.	+	22.66	20.8	1.08938
chr1	4946218	4947576	AT1G14450_	.	-	90.3	82.9	1.08925
chr2	12363426	12365377	AT2G28810_	.	+	17.81	16.35	1.08924
chr3	21515199	21516487	AT3G58100_PDCB5	.	-	65.67	60.29	1.08922
chr5	16660469	16660640	AT5G41663_MIR319,MIR319B	.	-	18.09	16.61	1.08905
chr1	2168564	2169851	AT1G07070_	.	+	64.32	59.06	1.08905
chr1	9330956	9331105	AT1G26921_	.	-	4.15	3.81	1.08901
chr5	25074883	25077294	AT5G62460_	.	+	63.39	58.21	1.08897
chr1	1762224	1762814	AT1G05835_	.	+	15.54	14.27	1.08894
chr4	18488437	18497136	AT4G39850_ABCD1,ACN2,AtABCD1,CTS,PED3,PXA1	.	+	60.87	55.9	1.08889
chr3	23229749	23230501	AT3G62820_	.	+	31.99	29.38	1.08881
chr1	23682422	23684367	AT1G63820_	.	-	15.81	14.52	1.08878
chr2	9463694	9465467	AT2G22270_	.	+	58.25	53.5	1.08877
chr2	15119542	15123184	AT2G36010_ATE2FA,E2F3	.	+	40.51	37.21	1.08866
chr1	20769320	20771871	AT1G55590_	.	-	64.11	58.89	1.08862
chr4	6431236	6434822	AT4G10380_AtNIP5;1,NIP5;1,NLM6,NLM8	.	-	16.46	15.12	1.08857
chr3	279060	283580	AT3G01780_TPLATE	.	+	64.22	59	1.08846
chr3	20506992	20513393	AT3G55320_ABCB20,PGP20	.	-	57.95	53.24	1.08845
chr4	6029413	6029724	AT4G09530_SAUR17	.	-	16.12	14.81	1.08839
chr2	19392558	19397831	AT2G47240_CER8,LACS1	.	+	14.89	13.68	1.08839
chr3	9375102	9375671	AT3G25717_DVL6,RTFL16	.	-	17.51	16.09	1.0882
chr5	5187587	5189348	AT5G15890_TBL21	.	-	12.7	11.67	1.08818
chr4	15787209	15789977	AT4G32720_AtLa1,La1	.	+	60.21	55.34	1.08799
chr5	13521779	13523425	AT5G35320_	.	+	71.48	65.7	1.08796
chr1	7447490	7448463	AT1G21280_	.	-	73.77	67.81	1.08788
chr1	28351562	28353495	AT1G75520_SRS5	.	-	19.44	17.87	1.08781
chr2	11842267	11843293	AT2G27775_	.	-	75.06	69.01	1.08766
chr2	18591665	18592455	AT2G45080_cycp3;1	.	+	22.09	20.31	1.0876
chr1	22368953	22372159	AT1G60780_AP1M2,HAP13	.	-	63.51	58.4	1.08749
chr1	9107519	9113725	AT1G26330_	.	+	17.28	15.89	1.08742
chr1	7696536	7697699	AT1G21910_DREB26	.	+	18.53	17.04	1.08739
chr5	9815402	9815473	AT5G27715_	.	-	10.32	9.49	1.08737
chr4	8167426	8173368	AT4G14160_	.	+	75.02	69	1.08723
chr1	18081033	18082925	AT1G48880_TBL7	.	+	42.74	39.31	1.08723
chr5	16070330	16073314	AT5G40200_DEG9,DegP9	.	+	66.13	60.83	1.08711
chr3	8321350	8324428	AT3G23280_XBAT35	.	+	62.52	57.51	1.0871
chr1	3991027	3993598	AT1G11820_	.	-	67.05	61.68	1.08705
chr2	7281462	7283646	AT2G16780_MSI02,MSI2,NFC02,NFC2	.	-	37.85	34.82	1.08699
chr1	16275108	16278624	AT1G43190_PTB3	.	-	51.72	47.58	1.08699
chr3	22621969	22625716	AT3G61130_GAUT1,LGT1	.	+	53.9	49.59	1.0869
chr5	3966365	3968878	AT5G12260_	.	+	62.05	57.09	1.08687
chr2	13609981	13610094	AT2G31981_	.	+	13.63	12.54	1.08685
chr2	19352324	19353114	AT2G47150_	.	-	30.95	28.48	1.0867
chr5	26574181	26574874	AT5G66590_	.	+	24.06	22.14	1.08668
chr3	18505836	18507835	AT3G49920_ATVDAC5,VDAC5	.	-	63.03	58.01	1.08652
chr2	17918927	17920429	AT2G43090_	.	+	108.8	100.14	1.08647
chr2	13081847	13085281	AT2G30700_	.	-	63.2	58.17	1.08646
chr1	19646465	19649261	AT1G52750_	.	-	16.72	15.39	1.08636
chr3	21748228	21749928	AT3G58800_	.	+	61.02	56.17	1.08633
chr1	27755512	27757211	AT1G73820_	.	-	71.12	65.47	1.08629
chr3	19000856	19006769	AT3G51150_	.	+	27.45	25.27	1.08623
chr5	17166818	17169459	AT5G42810_ATIPK1,IPK1	.	+	59.87	55.12	1.08616
chr3	7067057	7070946	AT3G20270_	.	+	42.23	38.88	1.08614
chr2	15356834	15358612	AT2G36640_ATECP63,ECP63	.	-	17.77	16.36	1.08613
chr1	11749823	11752106	AT1G32500_ABCI7,ATNAP6,NAP6	.	-	76.95	70.85	1.08609
chr1	27798313	27799596	AT1G73940_	.	-	65.45	60.27	1.08593
chr3	761310	763115	AT3G03270_	.	-	12.4	11.42	1.08574
chr1	3881529	3881608	AT1G11550_	.	+	6.07	5.59	1.08571
chr3	4083265	4083369	AT3G12835_	.	-	24.58	22.64	1.08565
chr1	27824433	27828926	AT1G73990_SPPA,SPPA1	.	+	53.86	49.61	1.08565
chr5	25204472	25209571	AT5G62760_	.	-	49.32	45.43	1.08561
chr4	16460920	16465323	AT4G34430_ATSWI3D,CHB3	.	+	52.02	47.92	1.08554
chr1	30243930	30244783	AT1G80450_	.	-	21.31	19.63	1.08554
chr1	8147264	8149813	AT1G23010_LPR1	.	+	19.42	17.89	1.08547
chr2	7285736	7287365	AT2G16800_	.	+	87.03	80.18	1.08542
chr1	22919534	22924024	AT1G62020_	.	+	50.46	46.49	1.08538
chr1	148120	149806	AT1G01390_	.	-	17.94	16.53	1.08525
chr2	18921024	18922179	AT2G46000_	.	-	27.89	25.7	1.08518
chr1	22428605	22428844	AT1G60913_	.	-	14.9	13.73	1.08515
chr4	17922756	17923973	AT4G38210_ATEXP20,ATEXPA20,ATHEXP,EXP20,EXPA20	.	-	25.35	23.36	1.08515
chr3	57641	58909	AT3G01170_	.	+	102.99	94.91	1.08512
chr3	7436026	7438011	AT3G21200_GluTRBP,PGR7	.	+	72.55	66.86	1.08509
chr1	29908013	29909988	AT1G79510_	.	-	81.87	75.45	1.08508
chr3	19346752	19349533	AT3G52170_	.	-	43.11	39.73	1.08505
chr1	493683	495158	AT1G02420_	.	+	82.07	75.64	1.085
chr3	11128625	11132076	AT3G29160_AKIN11,ATKIN11,KIN11,SNRK1.2	.	-	52.98	48.83	1.08497
chr5	2665976	2667155	AT5G08290_YLS8	.	+	93.86	86.51	1.08495
chr5	16551119	16556003	AT5G41370_ATXPB1,XPB1	.	+	58.77	54.18	1.0847
chr3	4982943	4985857	AT3G14830_	.	+	82.11	75.7	1.08467
chr2	17983691	17985104	AT2G43260_	.	-	84.13	77.57	1.08456
chr3	10657031	10662766	AT3G28430_	.	-	46.84	43.19	1.08449
chr2	882645	884148	AT2G03020_	.	-	18.01	16.61	1.08424
chr3	18071536	18074641	AT3G48750_CDC2,CDC2A,CDC2AAT,CDK2,CDKA1,CDKA;1	.	+	65.68	60.58	1.08417
chr1	1365118	1368844	AT1G04850_	.	-	67.51	62.27	1.08414
chr3	20396760	20398653	AT3G55030_PGPS2	.	+	76.52	70.59	1.08399
chr2	14151135	14153118	AT2G33390_	.	+	73.73	68.02	1.08393
chr2	18274806	18275792	AT2G44195_	.	+	18.46	17.03	1.08392
chr2	17862254	17863456	AT2G42940_AHL16,TEK	.	-	16.02	14.78	1.08384
chr5	4635797	4636676	AT5G14380_AGP6	.	-	18.22	16.81	1.08383
chr3	7933167	7935808	AT3G22410_	.	-	16.41	15.14	1.08383
chr2	11852080	11856291	AT2G27810_ATNAT12,NAT12	.	+	39.51	36.46	1.08363
chr4	352016	355233	AT4G00830_LIF2	.	+	62.88	58.03	1.08356
chr1	12351593	12355023	AT1G33980_ATUPF3,UPF3	.	+	61.47	56.73	1.08354
chr3	837877	840624	AT3G03520_NPC3	.	-	20.5	18.92	1.08347
chr4	18096809	18098565	AT4G38770_ATPRP4,PRP4	.	-	21.15	19.52	1.08346
chr5	16428706	16429437	AT5G41030_	.	+	26.87	24.8	1.08343
chr1	19186492	19188788	AT1G51730_	.	-	52.46	48.42	1.08342
chr4	16130824	16133960	AT4G33540_	.	+	53.15	49.06	1.08335
chr3	10743823	10747163	AT3G28670_	.	+	54.84	50.62	1.08335
chr3	583113	585948	AT3G02710_	.	+	70.7	65.26	1.08335
chr5	26504467	26506569	AT5G66350_SHI	.	-	23.91	22.07	1.08333
chr2	17000454	17002468	AT2G40750_ATWRKY54,WRKY54	.	-	22.25	20.54	1.08321
chr3	21111700	21114662	AT3G57050_CBL	.	-	60.3	55.67	1.08315
chr1	17983704	17986116	AT1G48635_PEX3,PEX3-2	.	+	61.62	56.89	1.08313
chr2	9471325	9476646	AT2G22300_CAMTA3,SR1	.	+	49.41	45.62	1.08306
chr2	11781038	11783992	AT2G27600_ATSKD1,SKD1,VPS4	.	+	80.49	74.32	1.08301
chr5	7240659	7241746	AT5G21910_	.	+	20.22	18.67	1.08298
chr1	3614513	3616159	AT1G10865_	.	-	47.63	43.98	1.08297
chr2	11783927	11786533	AT2G27610_	.	-	20.89	19.29	1.0829
chr1	29920083	29922676	AT1G79540_	.	-	54.47	50.3	1.08289
chr2	7485398	7487602	AT2G17210_	.	-	25.08	23.16	1.08287
chr5	4823714	4825373	AT5G14910_	.	+	71.79	66.3	1.08279
chr2	13339087	13343666	AT2G31280_CPUORF7	.	+	52.71	48.68	1.08277
chr1	6426898	6430696	AT1G18670_IBS1	.	-	38.62	35.67	1.08268
chr1	7499733	7499804	AT1G21420_	.	-	13.62	12.58	1.08261
chr2	17495680	17496142	AT2G41905_	.	+	14.15	13.07	1.08257
chr3	16954365	16956833	AT3G46180_ATUTR5,UTR5	.	-	51.13	47.23	1.08256
chr3	23377979	23381546	AT3G63280_ATNEK4,NEK4	.	+	19.14	17.68	1.08253
chr3	14195741	14196603	AT3G41762_	.	-	77.2	71.32	1.08243
chr2	9259583	9260656	AT2G21650_ATRL2,MEE3,RSM1	.	+	22.19	20.5	1.0824
chr5	2689713	2690974	AT5G08360_	.	+	27.85	25.73	1.08236
chr1	19776052	19776780	AT1G53060_	.	+	15.63	14.44	1.08235
chr1	10321210	10321864	AT1G29500_SAUR66	.	+	10.77	9.95	1.08233
chr4	17120085	17123841	AT4G36180_	.	-	47.37	43.77	1.08223
chr1	17466751	17473294	AT1G47560_SEC3B	.	+	20.94	19.35	1.08213
chr1	7108370	7110377	AT1G20530_	.	-	15.94	14.73	1.08209
chr5	24587213	24589580	AT5G61130_AtPDCB1,PDCB1	.	-	47.45	43.85	1.08208
chr4	16755112	16758091	AT4G35230_BSK1	.	-	68.94	63.71	1.08208
chr1	25018077	25019057	AT1G67035_	.	+	20.46	18.91	1.08192
chr1	5785003	5785927	AT1G16910_LSH8	.	+	20.46	18.91	1.08192
chr3	21018089	21020431	AT3G56750_	.	-	74.5	68.86	1.08189
chr1	24377314	24384079	AT1G65580_FRA3	.	-	63.98	59.14	1.08183
chr2	13655627	13657175	AT2G32140_	.	-	16.8	15.53	1.08172
chr5	21063368	21068057	AT5G51820_ATPGMP,PGM,PGM1,STF1	.	-	41.82	38.66	1.08172
chr5	4142958	4147091	AT5G13060_ABAP1	.	+	18.79	17.37	1.0817
chr4	2590065	2592163	AT4G05060_	.	-	57.95	53.58	1.08155
chr5	6747550	6748641	AT5G19970_	.	+	17.63	16.3	1.08155
chr1	4817144	4818020	AT1G14060_	.	-	90.05	83.27	1.08141
chr1	7677499	7677959	AT1G21866_	.	+	11.95	11.05	1.08137
chr5	4518008	4519300	AT5G14000_anac084,NAC084	.	+	15.81	14.62	1.08134
chr3	18496249	18498713	AT3G49880_	.	+	63.41	58.64	1.08133
chr1	25599491	25601463	AT1G68310_AE7	.	+	67.14	62.09	1.08132
chr1	4034587	4038758	AT1G11950_	.	-	33.95	31.4	1.08118
chr5	4133204	4136688	AT5G13030_	.	+	59.87	55.38	1.08106
chr5	25958025	25960644	AT5G64970_	.	-	39.93	36.94	1.08092
chr3	5323358	5324908	AT3G15710_	.	-	63.31	58.58	1.08073
chr4	11807660	11810117	AT4G22360_	.	+	90.26	83.52	1.08069
chr1	23199718	23203765	AT1G62660_	.	+	17.27	15.98	1.08068
chr3	2388952	2389811	AT3G07480_	.	+	141.39	130.84	1.08063
chr1	21141883	21144400	AT1G56450_PBG1	.	+	60.75	56.22	1.08056
[truncated: 6,776 more rows]

## Sheet: a4.bed
chr	START	END	GENE	NA	strand	H3K36me3 signal in WT	H3K36me3 signal in Sdg8 KO
chr1	10400564	10405874	AT1G29730_	.	-	9.19	11.22
chr3	22049730	22051595	AT3G59695_	.	-	15.58	19.02
chr3	25507	27449	AT3G01080_ATWRKY58,WRKY58	.	+	15.44	18.85
chr5	17428582	17429097	AT5G43401_	.	-	14.94	18.24
chr1	5968534	5969995	AT1G17410_	.	-	74.19	90.57
chr2	19378869	19382418	AT2G47210_	.	+	42.57	51.97
chr2	8865098	8866769	AT2G20585_NFD6	.	+	62.22	75.96
chr1	12851997	12853128	AT1G35140_EXL1,PHI-1	.	+	16.74	20.44
chr1	24347750	24348609	AT1G65484_	.	+	10.04	12.26
chr1	18707987	18715977	AT1G50500_ATVPS53,HIT1,VPS53	.	-	51.45	62.82
chr1	3465964	3469248	AT1G10520_AtPol{lambda},Pol{lambda}	.	+	26.19	31.98
chr1	2091738	2092528	AT1G06810_	.	-	16.14	19.71
chr2	13353821	13359728	AT2G31320_PARP1	.	-	31.34	38.27
chr5	1982444	1983172	AT5G06500_AGL96	.	+	22.47	27.44
chr5	19710215	19710578	AT5G48605_	.	+	12.02	14.68
chr2	12161226	12162032	AT2G28440_	.	+	13.87	16.94
chr1	666872	669837	AT1G02960_	.	-	42.89	52.38
chr3	4584011	4584487	AT3G13898_	.	+	15.54	18.98
chr1	23323317	23326053	AT1G62970_	.	+	77.25	94.35
chr5	5376961	5378533	AT5G16460_	.	-	14.67	17.92
chr3	7600150	7600883	AT3G21570_	.	-	13.99	17.09
chr1	10096951	10097022	AT1G28820_	.	+	16.88	20.62
chr1	8227178	8229582	AT1G23200_	.	+	16.29	19.9
chr4	13346654	13349016	AT4G26410_	.	+	64.06	78.25
chr2	873506	874811	AT2G02990_ATRNS1,RNS1	.	+	14.03	17.14
chr5	3839391	3842371	AT5G11920_AtcwINV6,cwINV6	.	+	12.67	15.48
chr5	7258363	7259308	AT5G21960_	.	-	18.44	22.53
chr3	2455290	2456879	AT3G07680_p24beta2	.	+	65.85	80.45
chr1	28177703	28178940	AT1G75040_PR-5,PR5	.	+	13.79	16.85
chr3	19293010	19294702	AT3G52000_scpl36	.	+	11.94	14.59
chr2	1214428	1214843	AT2G03931_	.	+	11.08	13.54
chr1	30227485	30234985	AT1G80410_EMB2753,OMA	.	-	57.55	70.32
chr4	12466345	12469844	AT4G24010_ATCSLG1,CSLG1	.	+	14.05	17.17
chr3	21570745	21572143	AT3G58250_	.	-	10.85	13.26
chr3	18620599	18623200	AT3G50230_	.	+	13.64	16.67
chr4	1188983	1193611	AT4G02700_SULTR3;2	.	+	10.98	13.42
chr3	11278589	11279108	AT3G29370_P1R3	.	+	20.03	24.48
chr5	17073779	17075856	AT5G42630_ATS,KAN4	.	-	13.5	16.5
chr5	25945712	25948341	AT5G64930_CPR5,HYS1	.	-	62.85	76.81
chr3	16477561	16479482	AT3G45060_ATNRT2.6,NRT2.6	.	-	17.64	21.56
chr5	2845824	2847415	AT5G08730_ARI16,ATARI16	.	-	12.73	15.56
chr5	10338723	10341007	AT5G28380_	.	-	0.08	0.1
chr2	8766739	8772591	AT2G20320_	.	+	48.53	59.32
chr4	15361091	15361850	AT4G31730_GDU1	.	+	15.96	19.51
chr1	5578431	5580693	AT1G16310_	.	+	13.44	16.43
chr5	19388737	19390629	AT5G47890_	.	+	67.82	82.9
chr3	21784116	21785840	AT3G58950_	.	-	11.01	13.46
chr4	17221996	17225016	AT4G36490_ATSFH12,SFH12	.	+	9.57	11.7
chr2	14868989	14871940	AT2G35330_	.	+	56.88	69.53
chr3	16382219	16383605	AT3G44870_	.	+	12.76	15.6
chr2	9280044	9281623	AT2G21730_ATCAD2,CAD2	.	+	6.06	7.41
chr5	26322948	26324578	AT5G65790_ATMYB68,MYB68	.	+	15.14	18.51
chr3	19758157	19759603	AT3G53290_CYP71B30P	.	+	9.88	12.08
chr3	14085298	14093670	AT3G33530_	.	+	44	53.79
chr4	9681539	9684975	AT4G17300_ATNS1,NS1,OVA8	.	+	59.92	73.26
chr5	23644711	23644792	AT5G58495_	.	+	11.76	14.38
chr1	3920543	3924555	AT1G11660_	.	+	42.35	51.78
chr5	15293121	15297323	AT5G38280_PR5K	.	-	10.05	12.29
chr5	19018101	19018443	AT5G46871_	.	+	16.15	19.75
chr1	17597898	17599099	AT1G47786_	.	+	9.82	12.01
chr4	8118537	8120358	AT4G14080_MEE48	.	-	19.15	23.42
chr1	29165210	29167773	AT1G77610_	.	+	70.47	86.18
chr2	13577555	13578248	AT2G31930_	.	+	17.98	21.99
chr1	1287831	1289820	AT1G04625_	.	-	14.48	17.71
chr4	15212498	15215856	AT4G31350_	.	+	55.78	68.22
chr5	8901741	8903219	AT5G25570_	.	+	24.07	29.44
chr2	18827000	18830528	AT2G45700_	.	-	59.17	72.37
chr5	20932031	20936413	AT5G51540_	.	+	45.63	55.81
chr4	11240730	11245049	AT4G21060_AtGALT2,GALT2	.	+	32.93	40.28
chr1	13545965	13558492	AT1G36180_ACC2	.	+	22.62	27.67
chr2	8090658	8091656	AT2G18660_AtPNP-A,PNP-A	.	-	12.31	15.06
chr4	15015267	15016977	AT4G30830_	.	-	12.53	15.33
chr1	27488217	27490766	AT1G73090_	.	+	55.61	68.03
chr3	18139392	18140561	AT3G48920_AtMYB45,MYB45	.	+	11.23	13.74
chr1	3655777	3658608	AT1G10940_ASK1,SNRK2-4,SNRK2.4,SRK2A	.	-	64.4	78.8
chr1	19188843	19191300	AT1G51740_ATSYP81,ATUFE1,SYP81,UFE1	.	+	79.19	96.9
chr4	10979741	10982646	AT4G20325_	.	+	24.45	29.92
chr5	23991253	23992798	AT5G59520_AtZIP2,ZIP2	.	-	16.13	19.74
chr5	8210822	8213086	AT5G24205_	.	-	11.48	14.05
chr5	1862369	1866433	AT5G06160_ATO	.	-	51.8	63.39
chr3	23328928	23332848	AT3G63150_ATCBG,MIRO2	.	-	56.94	69.68
chr5	2686245	2687251	AT5G08350_	.	-	13.31	16.29
chr1	9889125	9890993	AT1G28290_AGP31	.	-	15.5	18.97
chr5	5830581	5833901	AT5G17700_	.	-	11.52	14.1
chr1	24866095	24868992	AT1G66680_AR401	.	-	66.35	81.2
chr5	8677091	8682205	AT5G25150_TAF5	.	+	62.72	76.76
chr1	911436	911759	AT1G03660_	.	-	22.95	28.09
chr3	1242973	1246211	AT3G04600_	.	+	66.66	81.59
chr5	26151421	26157099	AT5G65440_	.	+	39.05	47.8
chr3	23049423	23051152	AT3G62280_	.	-	12.04	14.74
chr1	5381170	5385254	AT1G15660_CENP-C,CENP-C	.	+	29.71	36.37
chr4	8662992	8665759	AT4G15200_AFH3,FH3	.	-	10.34	12.66
chr5	1820132	1823771	AT5G06050_	.	+	40.75	49.89
chr4	10707426	10709015	AT4G19690_ATIRT1,IRT1	.	+	15.06	18.44
chr4	7053443	7055622	AT4G11680_	.	-	60.48	74.05
chr1	7128884	7130642	AT1G20580_	.	+	76.79	94.02
chr3	10148585	10150301	AT3G27420_	.	+	57.3	70.16
chr3	1161387	1164929	AT3G04380_SDG31,SUVR4	.	+	22.27	27.27
chr3	19243950	19246936	AT3G51870_	.	+	42.9	52.53
chr5	10030406	10032451	AT5G28030_DES1	.	-	13.09	16.03
chr3	18962793	18962897	AT3G51057_	.	-	9.97	12.21
chr3	10892435	10896074	AT3G28880_	.	+	12.91	15.81
chr1	25255232	25260430	AT1G67420_	.	+	29.95	36.68
chr3	19956656	19959041	AT3G53900_PYRR,UPP	.	-	35.68	43.7
chr3	66151	66980	AT3G01185_	.	+	12.58	15.41
chr2	13574032	13576367	AT2G31920_	.	-	11.42	13.99
chr5	14243109	14243546	AT5G36190_	.	-	10.13	12.41
chr1	29613122	29614695	AT1G78750_	.	-	16.04	19.65
chr1	4800169	4801850	AT1G14010_	.	-	56.63	69.37
chr1	471990	473160	AT1G02360_	.	-	14.97	18.34
chr5	25893780	25896582	AT5G64760_RPN5B	.	-	48.33	59.21
chr5	8604324	8608842	AT5G24970_	.	-	38.91	47.67
chr1	19531350	19535955	AT1G52430_	.	-	9.54	11.69
chr5	18986988	18988197	AT5G46795_MSP2	.	-	10.91	13.37
chr5	23071097	23074843	AT5G57015_ckl12	.	+	48.41	59.32
chr1	24398143	24400969	AT1G65620_AS2	.	+	13.92	17.06
chr1	1703092	1704691	AT1G05680_UGT74E2	.	-	17.2	21.08
chr1	11259872	11261209	AT1G31450_	.	-	14.76	18.09
chr2	10379159	10379407	AT2G24410_	.	-	15.2	18.63
chr5	7742940	7748933	AT5G23080_TGH	.	-	45.22	55.42
chr2	13819379	13822839	AT2G32550_	.	+	11.74	14.39
chr3	22850837	22856972	AT3G61740_ATX3,SDG14	.	-	53.55	65.63
chr5	927915	930781	AT5G03640_	.	+	11.03	13.52
chr3	16541673	16548278	AT3G45190_	.	-	64.72	79.32
chr1	5758855	5760501	AT1G16825_	.	+	52.91	64.85
chr3	7878982	7879808	AT3G22275_	.	-	11.42	14
chr3	8931977	8932708	AT3G24510_	.	+	11.64	14.27
chr1	2072979	2076505	AT1G06750_	.	+	10.31	12.64
chr4	5996803	5997266	AT4G09462_	.	+	11.24	13.78
chr4	7085970	7088212	AT4G11780_TRM10	.	+	16.2	19.86
chr1	5320615	5323895	AT1G15490_	.	-	43.08	52.81
chr3	20595126	20597603	AT3G55530_AtSDIR1,SDIR1	.	-	68.14	83.53
chr5	22241481	22243721	AT5G54750_	.	+	62.99	77.22
chr2	16666023	16672494	AT2G39930_ATISA1,ISA1	.	+	54.71	67.07
chr1	20158664	20160815	AT1G54010_GLL23	.	-	12.12	14.86
chr1	3862399	3864030	AT1G11475_NRPB10,NRPD10,NRPE10	.	+	71.79	88.01
chr5	1620458	1622340	AT5G05470_ATEIF2-A2,EIF2,EIF2-A2	.	+	76.15	93.36
chr3	20852385	20855610	AT3G56210_	.	-	38.43	47.12
chr5	18465355	18470926	AT5G45560_	.	+	24.08	29.53
chr1	10305951	10306499	AT1G29450_SAUR64	.	-	14.22	17.44
chr5	9687378	9689420	AT5G27430_	.	+	67.86	83.22
chr2	15903125	15905391	AT2G38000_	.	-	63.25	77.57
chr1	7890464	7892090	AT1G22340_AtUGT85A7,UGT85A7	.	-	15.14	18.57
chr5	2628325	2631098	AT5G08170_ATAIH,EMB1873	.	-	50.59	62.05
chr1	28174378	28175383	AT1G75030_ATLP-3,TLP-3	.	+	16.06	19.7
chr1	10344046	10346243	AT1G29600_	.	+	11.38	13.96
chr3	17974977	17976670	AT3G48520_CYP94B3	.	-	17.47	21.43
chr4	9749728	9751709	AT4G17486_	.	-	55.55	68.14
chr5	839885	841875	AT5G03406_	.	+	52.36	64.23
chr2	8510020	8511339	AT2G19720_rps15ab	.	-	41.77	51.24
chr1	2609996	2613242	AT1G08290_WIP3	.	-	12.87	15.79
chr5	1434774	1437330	AT5G04900_NOL	.	+	60.68	74.44
chr3	2070388	2073800	AT3G06630_	.	-	13.66	16.76
chr5	3441752	3444142	AT5G10920_	.	+	59.55	73.06
chr1	18026838	18027009	AT1G48742_MIR157D	.	-	12.73	15.62
chr2	8970886	8971303	AT2G20835_	.	-	15.37	18.86
chr4	13682078	13683538	AT4G27330_NZZ,SPL	.	-	17.79	21.83
chr3	1109118	1112188	AT3G04220_	.	-	13.91	17.07
chr4	15763237	15765114	AT4G32680_	.	-	72.73	89.25
chr1	4860515	4860649	AT1G14225_	.	-	23.15	28.41
chr2	1576709	1578741	AT2G04530_CPZ,TRZ2	.	+	43.27	53.1
chr2	3269151	3269906	AT2G07674_	.	+	3.38	4.15
chr3	6459884	6463059	AT3G18770_	.	-	42.56	52.23
chr1	22208332	22212171	AT1G60220_OTS1,ULP1D	.	+	50.6	62.1
chr3	21133013	21134482	AT3G57100_	.	-	16.66	20.45
chr3	961997	968149	AT3G03790_	.	+	49.42	60.66
chr5	24285920	24287808	AT5G60380_	.	+	11.77	14.45
chr1	4550153	4551620	AT1G13290_DOT5,WIP6	.	-	15.15	18.6
chr1	11271744	11273075	AT1G31485_	.	+	12.5	15.35
chr5	5037021	5038172	AT5G15520_	.	-	44.49	54.63
chr5	9445312	9450865	AT5G26850_	.	+	35.4	43.47
chr4	15035207	15035843	AT4G30880_	.	+	12.45	15.29
chr5	26303693	26308189	AT5G65750_	.	+	38.75	47.59
chr5	15225767	15226208	AT5G38160_	.	+	19.28	23.68
chr1	4289944	4291017	AT1G12610_DDF1	.	-	14.15	17.38
chr3	3289695	3292702	AT3G10540_	.	+	56.32	69.17
chr1	29081904	29084285	AT1G77390_CYCA1,CYCA1;2,DYP,TAM	.	-	33.07	40.62
chr1	5532415	5534877	AT1G16150_WAKL4	.	+	10.59	13.01
chr5	19501157	19504357	AT5G48110_	.	-	11.86	14.57
chr2	16751714	16754535	AT2G40116_	.	+	10.02	12.31
chr3	12445010	12445132	AT3G30769_	.	-	11.99	14.73
chr3	3423893	3424566	AT3G10950_	.	+	17.37	21.34
chr3	17576004	17576537	AT3G47675_	.	-	9.27	11.39
chr4	11184103	11185844	AT4G20900_MS5,TDM1	.	-	11.02	13.54
chr5	4733762	4734547	AT5G14690_	.	-	18.59	22.84
chr4	14066875	14072545	AT4G28470_ATRPN1B,RPN1B	.	-	46.2	56.76
chr1	6746778	6751507	AT1G19485_	.	+	44.57	54.76
chr4	403320	404810	AT4G00940_AtDOF4.1,DOF4.1,ITD1	.	-	17.27	21.22
chr2	19543991	19544806	AT2G47670_PMEI6	.	-	25.1	30.84
chr2	1938618	1939470	AT2G05330_	.	-	12.37	15.2
chr1	16478247	16482837	AT1G43690_	.	+	56.68	69.64
chr5	3958901	3960845	AT5G12240_	.	-	54.23	66.63
chr5	20255191	20259300	AT5G49840_	.	+	64.04	78.69
chr5	4301792	4304312	AT5G13420_TRA2	.	-	57.7	70.9
chr5	16529455	16532879	AT5G41315_GL3,GL3,MYC6.2	.	+	14.89	18.3
chr3	18530329	18531477	AT3G49980_	.	-	14.84	18.24
chr1	29650454	29652593	AT1G78870_UBC13A,UBC35	.	+	70.04	86.08
chr5	25913999	25914523	AT5G64820_	.	-	15.01	18.45
chr1	9763436	9768068	AT1G28010_ABCB14,ATABCB14,MDR12,PGP14	.	+	10.37	12.75
chr3	2945696	2945777	AT3G09595_	.	-	17.04	20.95
chr1	24665629	24668783	AT1G66210_	.	-	12.81	15.75
chr5	335630	336277	AT5G01860_	.	+	15.51	19.07
chr4	585598	588029	AT4G01430_UMAMIT29	.	+	13.11	16.12
chr5	25149433	25152541	AT5G62640_AtELF5,ELF5	.	-	52.73	64.83
chr5	6642004	6646530	AT5G19660_ATS1P,ATSBT6.1,S1P	.	-	62.88	77.31
chr1	8215721	8219584	AT1G23180_	.	+	38.82	47.73
chr3	3051868	3052784	AT3G09925_	.	-	14.72	18.1
chr2	18297861	18300273	AT2G44270_ROL5	.	-	60.52	74.41
chr3	19792531	19796753	AT3G53390_	.	+	63.69	78.31
chr2	11081302	11085350	AT2G26000_BRIZ2	.	+	46.87	57.63
chr2	795896	796492	AT2G02795_	.	+	16.11	19.81
chr5	14127984	14136324	AT5G35980_YAK1	.	+	69.82	85.85
chr5	7929351	7931793	AT5G23520_	.	-	60.96	74.96
chr3	868791	871812	AT3G03610_	.	+	45.32	55.73
chr5	24579170	24580327	AT5G61100_	.	-	12.22	15.03
chr5	614644	614725	AT5G02725_	.	+	3.21	3.95
chr3	20823146	20826543	AT3G56120_	.	+	47.76	58.74
chr3	11297283	11299620	AT3G29400_ATEXO70E1,EXO70E1	.	-	62.98	77.46
chr5	7310171	7313670	AT5G22080_	.	-	67.24	82.7
chr2	7568018	7570840	AT2G17430_ATMLO7,MLO7,NTA	.	+	11.56	14.22
chr5	5603133	5604738	AT5G17030_UGT78D3	.	-	14.21	17.48
chr2	14903045	14905372	AT2G35450_	.	-	50.47	62.08
chr3	2729819	2736884	AT3G08960_	.	-	58.68	72.18
chr2	14133929	14137154	AT2G33350_	.	+	12.51	15.39
chr1	19031997	19034979	AT1G51340_	.	+	10.9	13.41
chr1	86515	88213	AT1G01200_ATRAB-A3,ATRABA3,RABA3	.	-	16.42	20.2
chr1	12426778	12429710	AT1G34120_AT5P1,AT5PTASE1,ATIP5PI,IP5PI	.	+	52.19	64.2
chr5	2280667	2283593	AT5G07270_XBAT33	.	+	56.71	69.76
chr3	846350	848297	AT3G03540_NPC5	.	-	11.16	13.73
chr4	10093524	10097503	AT4G18260_	.	-	41.31	50.82
chr4	18417656	18421971	AT4G39690_	.	+	52.05	64.04
chr5	10320139	10326946	AT5G28350_	.	+	26.03	32.03
chr3	3610147	3612370	AT3G11470_	.	-	55.41	68.18
chr2	16340282	16340360	AT2G39175_FOC,MIR160,MIR160A	.	+	22.64	27.86
chr2	14905788	14906504	AT2G35460_	.	+	22.85	28.12
chr5	26380123	26385221	AT5G65950_	.	+	58.11	71.51
chr1	21195804	21197721	AT1G56570_PGN	.	+	65.59	80.72
chr1	10841142	10845050	AT1G30600_	.	-	29.28	36.04
chr1	16780606	16786764	AT1G44125_	.	-	31.53	38.81
chr5	1071568	1073423	AT5G03970_	.	-	54.47	67.05
chr1	20017389	20017932	AT1G53633_	.	-	10.6	13.05
chr3	10243755	10245023	AT3G27660_OLE3,OLEO4	.	+	49.56	61.01
chr1	25621678	25622412	AT1G68360_	.	-	21.07	25.94
chr3	22316913	22319266	AT3G60380_	.	-	52.61	64.77
chr1	16716112	16718656	AT1G44020_	.	-	9.38	11.55
chr2	18013370	18015454	AT2G43370_	.	+	53.08	65.35
chr1	22365832	22366323	AT1G60760_	.	+	17.49	21.54
chr3	1157004	1158310	AT3G04360_	.	-	19.17	23.61
chr1	3227490	3230043	AT1G09930_ATOPT2,OPT2	.	-	14.72	18.13
chr3	7624495	7626654	AT3G21660_	.	-	12.56	15.47
chr4	10239881	10247372	AT4G18600_ATSCAR-LIKE,SCARL,WAVE5	.	-	37.86	46.63
chr4	5982215	5982748	AT4G09440_	.	-	13.2	16.26
chr5	5316299	5322696	AT5G16270_ATRAD21.3,SYN4	.	+	52.48	64.64
chr2	19448139	19457294	AT2G47410_	.	+	53.38	65.75
chr3	22064308	22065879	AT3G59730_LecRK-V.6	.	-	8.32	10.25
chr1	29601253	29604557	AT1G78710_TBL42	.	+	13.02	16.04
chr2	7166107	7166440	AT2G16535_	.	-	17.85	21.99
chr4	15985189	15991538	AT4G33150_LKR,LKR/SDH,SDH	.	-	17.37	21.4
chr5	20736337	20739295	AT5G50970_	.	+	51.91	63.95
chr1	7997676	8002944	AT1G22620_ATSAC1	.	-	52.2	64.31
chr1	707726	710041	AT1G03050_	.	+	10.94	13.48
chr1	28030521	28032452	AT1G74630_	.	+	37.28	45.93
chr5	6904705	6905391	AT5G20430_	.	+	12.01	14.8
chr2	15173782	15174216	AT2G36180_	.	-	18.17	22.39
chr3	22887191	22887322	AT3G61829_	.	-	2.79	3.44
chr4	983970	984523	AT4G02250_	.	+	15.67	19.31
chr3	18994141	18997589	AT3G51130_	.	+	65.15	80.28
chr1	5139712	5143689	AT1G14910_	.	-	54.77	67.49
chr3	5126597	5132306	AT3G15220_	.	-	49.89	61.48
chr5	15416018	15417253	AT5G38500_	.	-	14.37	17.71
chr1	119397	119997	AT1G01305_	.	+	14.67	18.08
chr4	527591	528144	AT4G01245_	.	+	8.04	9.91
chr1	4840697	4841848	AT1G14160_	.	-	14.02	17.28
chr3	7604551	7605789	AT3G21590_	.	-	8.21	10.12
chr2	14106410	14107720	AT2G33280_	.	+	14.75	18.18
chr3	10307421	10310308	AT3G27810_ATMYB21,ATMYB3,MYB21	.	+	11.22	13.83
chr5	1949315	1950282	AT5G06380_	.	+	18.23	22.47
chr3	2718880	2722624	AT3G08943_	.	-	32.77	40.39
chr4	10466477	10469092	AT4G19130_	.	-	25.67	31.64
chr2	13164059	13166726	AT2G30933_	.	-	11.73	14.46
chr5	20306409	20307943	AT5G49920_	.	-	13.02	16.05
chr5	23230879	23236572	AT5G57350_AHA3,ATAHA3,HA3	.	-	11.64	14.35
chr5	16595927	16598636	AT5G41480_ATDFA,DFA,EMB9,GLA1	.	+	53.05	65.4
chr3	5566086	5568545	AT3G16400_ATMLP-470,ATNSP1,NSP1	.	+	9.57	11.8
chr5	383153	385850	AT5G02010_ATROPGEF7,ROPGEF7	.	+	34.91	43.04
chr2	11025420	11030776	AT2G25850_PAPS2	.	-	60.29	74.33
chr1	22001504	22003385	AT1G59790_	.	+	12.96	15.98
chr5	4162503	4164794	AT5G13120_ATCYP20-2,CYP20-2,Pnsl5	.	-	75.53	93.12
chr1	18128686	18131522	AT1G49005_CLE11	.	-	10.21	12.59
chr2	13581581	13582126	AT2G31945_	.	+	14.41	17.77
chr3	2409477	2411294	AT3G07550_	.	+	72.69	89.63
chr2	15197369	15200603	AT2G36250_ATFTSZ2-1,FTSZ2-1	.	-	57.54	70.95
chr4	14151387	14153935	AT4G28670_	.	+	10.46	12.9
chr1	28408147	28415117	AT1G75660_AtXRN3,XRN3	.	+	59.54	73.42
chr1	24117440	24118798	AT1G64920_	.	-	13.59	16.76
chr5	4360631	4366448	AT5G13560_	.	-	42.93	52.94
chr3	2891040	2893629	AT3G09400_PLL3	.	-	14.53	17.92
chr1	11985707	11990482	AT1G33080_	.	+	14.1	17.39
chr3	5088366	5095482	AT3G15120_	.	-	44.11	54.4
chr4	8979889	8981768	AT4G15780_ATVAMP724,VAMP724	.	-	58.26	71.86
chr1	25408043	25410153	AT1G67770_TEL2	.	+	16.31	20.12
chr2	18293457	18295536	AT2G44250_	.	+	11.64	14.36
chr5	19820353	19820874	AT5G48890_LATE	.	+	14.76	18.21
chr4	15172897	15176109	AT4G31230_	.	-	10.65	13.14
chr1	8130716	8132208	AT1G22970_	.	-	70.75	87.28
chr3	4411688	4419320	AT3G13530_MAP3KE1,MAPKKK7	.	-	54.61	67.37
chr3	18093404	18095181	AT3G48790_	.	+	11.76	14.51
chr1	976097	977761	AT1G03850_ATGRXS13,GRXS13	.	-	13.47	16.62
chr2	15451573	15453714	AT2G36840_ACR10	.	-	59.42	73.31
chr1	11137365	11138969	AT1G31173_MIR167D	.	+	13.8	17.03
chr5	20781816	20784071	AT5G51130_	.	+	60.46	74.61
chr1	3493940	3495144	AT1G10585_	.	-	15.8	19.5
chr1	9020380	9022769	AT1G26090_	.	+	52.29	64.53
chr5	9823679	9827064	AT5G27740_EMB161,EMB251,EMB2775,RFC3	.	+	48.4	59.73
chr1	26502909	26504619	AT1G70330_ENT1,ENT1,AT	.	+	87.23	107.65
chr3	17521029	17522624	AT3G47540_	.	+	15.37	18.97
chr5	21478841	21479203	AT5G52965_	.	+	15.71	19.39
chr1	19434509	19438971	AT1G52190_AtNPF1.2,NPF1.2,NRT1.11	.	+	12.42	15.33
chr3	19139552	19142085	AT3G51610_NPU	.	-	63.32	78.15
chr4	14029009	14031040	AT4G28360_	.	-	49.31	60.86
chr2	15202646	15203703	AT2G36260_	.	+	11.86	14.64
chr3	15367596	15370059	AT3G43440_JAZ11,TIFY3A	.	+	62.11	76.66
chr2	8538776	8539217	AT2G19802_	.	-	11.26	13.9
chr1	8024967	8026356	AT1G22680_	.	-	14.84	18.32
chr4	13154711	13155033	AT4G25885_	.	-	39.12	48.29
chr1	17033335	17035105	AT1G45063_	.	-	11.72	14.47
chr3	23197658	23200635	AT3G62710_	.	-	13.81	17.05
chr4	16592397	16592717	AT4G34780_SAUR2	.	-	20.42	25.21
chr1	16970214	16974641	AT1G44900_ATMCM2,MCM2	.	+	20.5	25.31
chr1	21721404	21722429	AT1G58460_	.	+	14.53	17.94
chr2	3703304	3703492	AT2G09838_	.	-	5.19	6.41
chr5	15303336	15305548	AT5G38290_	.	+	52.71	65.08
chr5	8512042	8513164	AT5G24790_	.	+	16.14	19.93
chr5	4958337	4962013	AT5G15270_	.	+	53.55	66.12
chr1	30287763	30290298	AT1G80560_ATIMD2,IMD2	.	+	51.33	63.38
chr5	18622759	18624785	AT5G45920_	.	+	10.3	12.72
chr3	21283338	21285941	AT3G57510_ADPG1	.	-	12.64	15.61
chr4	11762292	11762688	AT4G22230_	.	+	13.96	17.24
chr2	5736570	5737847	AT2G13770_	.	+	5.27	6.51
chr3	7038995	7040029	AT3G20160_	.	+	17.61	21.75
chr3	21946118	21948372	AT3G59390_	.	+	57.36	70.84
chr1	9054744	9056852	AT1G26180_	.	+	64.07	79.13
chr5	3803336	3808207	AT5G11800_ATKEA6,KEA6	.	-	49.38	60.99
chr1	2381615	2386092	AT1G07705_NOT2a	.	+	52.57	64.93
chr1	8498803	8499499	AT1G24010_	.	-	12.41	15.33
chr3	20981381	20984336	AT3G56640_SEC15A	.	+	37.46	46.27
chr4	11949180	11951424	AT4G22750_	.	-	61.63	76.13
chr4	12977004	12977138	AT4G25386_	.	-	5.17	6.39
chr5	9571185	9571989	AT5G27200_ACP5	.	+	9.33	11.53
chr1	28844644	28845765	AT1G76830_	.	+	11.41	14.1
chr3	11011308	11013358	AT3G29030_ATEXP5,ATEXPA5,ATHEXP,EXP5,EXPA5	.	-	12.98	16.04
chr1	12991392	12992145	AT1G35365_	.	+	10.77	13.31
chr3	12139512	12140033	AT3G30530_ATBZIP42,bZIP42	.	+	16.2	20.02
chr1	21684584	21688321	AT1G58370_ATXYN1,RXF12	.	+	10.81	13.36
chr3	17710374	17712866	AT3G47980_	.	+	13.61	16.82
chr2	19376202	19377531	AT2G47190_ATMYB2,MYB2	.	+	11.78	14.56
chr3	7767433	7768526	AT3G22053_	.	+	13.43	16.6
chr3	23159776	23161854	AT3G62620_	.	+	58.37	72.14
chr1	16975604	16982965	AT1G44910_ATPRP40A,PRP40A	.	+	56.25	69.52
chr5	15619691	15619786	AT5G39024_	.	+	12.2	15.08
chr1	22241273	22242235	AT1G60350_anac024,NAC024	.	-	14.4	17.8
chr3	2686583	2695300	AT3G08850_ATRAPTOR1B,RAPTOR1,RAPTOR1B	.	-	63.18	78.09
chr3	22421410	22423477	AT3G60660_	.	+	28.3	34.98
chr4	12581601	12587384	AT4G24270_EMB140	.	-	50.21	62.06
chr5	6986235	6991043	AT5G20660_	.	+	53.09	65.62
chr3	1864273	1867267	AT3G06160_	.	+	12.83	15.86
chr5	22583985	22586347	AT5G55810_AtNMNAT,NMNAT	.	-	50.12	61.96
chr4	17758243	17759557	AT4G37780_ATMYB87,MYB87	.	-	14.13	17.47
chr2	224156	226192	AT2G01500_HOS9,PFS2,WOX6	.	-	13.41	16.58
chr4	15245813	15247927	AT4G31420_REIL1	.	-	74.47	92.07
chr4	17982774	17985372	AT4G38420_sks9	.	+	14.75	18.24
chr1	27799830	27804604	AT1G73950_	.	-	50.95	63
chr2	16938705	16939616	AT2G40560_	.	-	16.99	21.01
chr5	1934739	1935644	AT5G06330_	.	-	22.91	28.33
chr4	2459880	2461739	AT4G04860_DER2.2	.	+	56.33	69.66
chr5	17371838	17373201	AT5G43290_ATWRKY49,WRKY49	.	-	14.95	18.49
chr4	7970200	7974248	AT4G13730_	.	+	60.54	74.87
chr2	17117263	17121119	AT2G41020_	.	+	57.86	71.56
chr1	12932941	12934479	AT1G35250_ALT2	.	-	10.38	12.84
chr3	464279	467074	AT3G02310_AGL4,SEP2	.	-	11.22	13.88
chr5	2048243	2055019	AT5G06670_	.	-	33.63	41.6
chr3	20814047	20816035	AT3G56090_ATFER3,FER3	.	-	50.93	63
chr4	12732678	12740051	AT4G24680_MOS1	.	+	52.11	64.46
chr2	17601955	17603633	AT2G42260_PYM,UVI4	.	-	28.76	35.58
chr5	14986033	14986917	AT5G37730_	.	-	12.35	15.28
chr2	7205391	7205918	AT2G16620_	.	-	9.65	11.94
chr3	8997370	9001063	AT3G24650_ABI3,ABI3,SIS10	.	+	16.35	20.23
chr3	22182291	22183078	AT3G60060_	.	+	16.72	20.69
chr3	10581704	10583000	AT3G28320_	.	+	11.24	13.91
chr1	3244213	3247200	AT1G09960_ATSUC4,ATSUT4,SUC4,SUT4	.	+	50.76	62.81
chr1	12087580	12088958	AT1G33340_	.	+	12.71	15.73
chr3	3879495	3880437	AT3G12160_ATRABA4D,RABA4D	.	-	18.48	22.87
chr5	1712670	1715731	AT5G05700_ATATE1,ATE1,DLS1	.	-	53.69	66.44
chr5	6485617	6487009	AT5G19270_	.	-	15.32	18.96
chr3	5111893	5116007	AT3G15180_	.	+	50.89	62.98
chr5	20843998	20848340	AT5G51290_ACD5	.	-	50.5	62.5
chr4	14114104	14115897	AT4G28556_RIC7	.	+	9.25	11.45
chr3	19153592	19153732	AT3G51636_	.	+	23.35	28.9
chr2	7802825	7803947	AT2G17940_	.	+	15.52	19.21
chr2	11699549	11704272	AT2G27350_OTLD1	.	-	53.77	66.55
chr3	611524	613448	AT3G02820_	.	+	31.25	38.68
chr2	13693105	13697154	AT2G32250_FRS2	.	+	38.52	47.68
chr1	5430183	5436412	AT1G15780_NRB4	.	-	51.93	64.28
chr4	9846127	9847107	AT4G17690_	.	+	19.58	24.24
chr1	12492411	12494544	AT1G34270_	.	-	64.89	80.33
chr4	18134116	18135714	AT4G38880_ASE3,ATASE3	.	+	13.73	17
chr1	29979973	29982773	AT1G79680_ATWAKL10,WAKL10	.	-	14.44	17.88
chr2	3514745	3522491	AT2G07680_ABCC13,ATMRP11,MRP11	.	+	9.48	11.74
chr1	9510475	9512860	AT1G27385_	.	-	62.42	77.29
chr1	18367593	18375381	AT1G49630_ATPREP2,PREP2	.	-	40.67	50.36
chr1	11514594	11515595	AT1G32030_	.	+	12.83	15.89
chr1	21950738	21952210	AT1G59725_	.	+	12.24	15.16
chr2	16160576	16160809	AT2G38646_	.	+	14.46	17.91
chr5	2293353	2298976	AT5G07290_AML4,ML4	.	+	54.59	67.61
chr1	534827	535699	AT1G02540_	.	-	11.27	13.96
chr2	14740468	14743417	AT2G34940_BP80-3;2,VSR3;2,VSR5	.	+	13.91	17.23
chr1	29246074	29248028	AT1G77770_	.	-	61.31	75.94
chr2	16782522	16784147	AT2G40180_ATHPP2C5,PP2C5	.	+	13.36	16.55
chr4	16480022	16480480	AT4G34470_ASK12,SK12	.	-	4.6	5.7
chr4	18542171	18542244	AT4G39985_	.	+	4.39	5.44
chr2	9040852	9043626	AT2G21070_FIO1	.	+	48.85	60.51
chr1	9292446	9293784	AT1G26820_RNS3	.	-	10.59	13.12
chr2	10516880	10520549	AT2G24710_ATGLR2.3,GLR2.3	.	-	10.17	12.6
chr4	16835986	16839375	AT4G35440_ATCLC-E,CLC-E,CLCE	.	-	75.98	94.12
chr3	23217425	23218246	AT3G62760_ATGSTF13	.	-	16.28	20.17
chr1	2428911	2429431	AT1G07860_	.	-	14.56	18.04
chr1	25449367	25451012	AT1G67870_	.	-	11.67	14.46
chr5	20871918	20872277	AT5G51360_	.	+	13.93	17.26
chr1	4484584	4488577	AT1G13160_	.	+	49.8	61.7
chr5	24526847	24528084	AT5G60950_COBL5	.	-	15.1	18.71
chr1	4014847	4016540	AT1G11905_	.	+	65.31	80.92
chr1	18730831	18732177	AT1G50580_	.	+	13.88	17.2
chr5	5195683	5199559	AT5G15920_EMB2782,SMC5	.	+	43.15	53.47
chr3	2873449	2878591	AT3G09360_	.	+	46.87	58.08
chr5	5988744	5990681	AT5G18110_NCBP	.	-	86.72	107.46
chr4	12923919	12929156	AT4G25230_RIN2	.	+	58.65	72.68
chr2	11625417	11628189	AT2G27200_	.	+	50.66	62.78
chr4	13694881	13700780	AT4G27370_ATVIIIB,VIIIB	.	-	14.66	18.17
chr3	9650417	9652897	AT3G26340_	.	-	46.59	57.74
chr3	7309279	7312752	AT3G20870_ZTP29	.	-	52.81	65.45
chr3	19074036	19074426	AT3G51380_IQD20	.	-	16.12	19.98
chr5	9066377	9067974	AT5G25970_	.	+	10.98	13.61
chr2	14263732	14265202	AT2G33720_	.	+	14.03	17.39
chr1	29610494	29611492	AT1G78740_	.	-	12.44	15.42
chr1	21342721	21344804	AT1G57620_CYB	.	+	65.58	81.28
chr3	21911601	21917844	AT3G59290_	.	+	38.8	48.09
chr1	11349840	11355486	AT1G31710_	.	+	12.23	15.16
chr1	19786900	19789029	AT1G53100_	.	-	11.6	14.38
chr1	21472965	21474602	AT1G58037_	.	-	11.68	14.48
chr1	25562118	25563948	AT1G68200_	.	+	14.6	18.1
chr5	14184423	14185277	AT5G36080_	.	+	11.05	13.7
chr4	18003916	18006140	AT4G38480_	.	+	44.98	55.76
chr4	13116076	13116838	AT4G25760_ATGDU2,GDU2	.	+	18.31	22.7
chr1	20056533	20059638	AT1G53720_ATCYP59,CYP59	.	+	54.05	67.01
chr3	18980263	18982291	AT3G51100_	.	-	63.85	79.16
chr5	16632086	16633896	AT5G41590_	.	-	13.17	16.33
chr3	3050989	3051530	AT3G09922_ATIPS1,IPS1	.	+	12.21	15.14
chr2	450379	451910	AT2G01960_TET14	.	+	13.46	16.69
chr1	23836249	23836620	AT1G64235_	.	+	14.25	17.67
chr4	12529875	12533842	AT4G24140_	.	-	13.04	16.17
chr1	25280451	25286611	AT1G67490_GCS1,KNF	.	-	51.93	64.4
chr1	6756284	6757377	AT1G19510_ATRL5,RL5,RSM4	.	-	10.86	13.47
chr1	6265416	6266937	AT1G18200_AtRABA6b,RABA6b	.	-	15.48	19.2
chr2	7609236	7616342	AT2G17510_EMB2763	.	-	56.57	70.16
chr3	14787740	14787859	AT3G42728_	.	+	7.4	9.18
chr3	80176	82005	AT3G01260_	.	-	11.35	14.08
chr4	11292192	11294009	AT4G21190_emb1417	.	-	54.11	67.12
chr3	7029175	7030787	AT3G20140_CYP705A23	.	+	8.89	11.03
chr1	22217077	22217832	AT1G60250_BBX26	.	-	19.95	24.75
chr5	24773657	24774502	AT5G61630_	.	-	15.04	18.66
chr2	9107546	9110261	AT2G21270_UFD1	.	+	55.7	69.11
chr3	18686443	18700533	AT3G50380_	.	-	40.95	50.81
chr3	4043310	4044609	AT3G12720_ATMYB67,ATY53,MYB67,MYB67	.	-	14.03	17.41
chr2	6588743	6590167	AT2G15180_	.	-	9.46	11.74
chr3	17731480	17733492	AT3G48040_ARAC8,ATRAC8,ATROP10,ROP10	.	+	46.05	57.14
chr3	9104495	9105648	AT3G24929_	.	+	77.18	95.77
chr5	20788984	20791808	AT5G51150_	.	+	67.17	83.35
chr3	4266964	4268251	AT3G13228_	.	+	15.64	19.41
chr5	24137412	24139367	AT5G59940_	.	+	13.27	16.47
chr3	3963124	3964222	AT3G12502_	.	+	11.52	14.3
chr5	14021022	14021612	AT5G35870_	.	+	20.31	25.21
chr1	18902930	18905204	AT1G50990_BSK11	.	+	13.63	16.92
chr2	3303766	3304573	AT2G07774_	.	-	1.98	2.46
chr5	19059519	19060121	AT5G46950_	.	-	12.01	14.91
chr1	1822618	1823997	AT1G06010_	.	+	57.23	71.04
chr4	15127246	15130021	AT4G31110_	.	+	9.73	12.08
chr1	10210520	10212722	AT1G29220_	.	-	71.85	89.19
chr1	23379665	23380669	AT1G63055_	.	+	11.51	14.29
chr1	3453228	3460620	AT1G10490_	.	+	44.45	55.18
chr2	15379694	15381987	AT2G36690_	.	+	15.4	19.12
chr1	25053734	25054847	AT1G67100_LBD40	.	+	24.01	29.81
chr2	19595640	19598581	AT2G47850_	.	+	45	55.87
chr1	24357867	24358616	AT1G65500_	.	+	13.57	16.85
chr1	11243191	11244392	AT1G31390_	.	-	10.09	12.53
chr2	1573637	1574478	AT2G04515_	.	+	15.26	18.95
chr2	8701013	8704357	AT2G20170_	.	+	11.49	14.27
chr5	23915530	23918192	AT5G59290_ATUXS3,UXS3	.	-	35.73	44.37
chr5	14564392	14564971	AT5G36920_	.	-	10.78	13.39
chr5	16492320	16493994	AT5G41210_ATGSTT1,GST10,GSTT1	.	-	59.35	73.71
chr5	25472598	25476511	AT5G63630_	.	-	43.39	53.89
chr5	5018711	5020703	AT5G15460_MUB2	.	-	50.66	62.92
chr1	958759	959609	AT1G03810_	.	+	16.48	20.47
chr5	22465693	22467209	AT5G55440_	.	+	10.65	13.23
chr5	15847078	15849108	AT5G39580_	.	-	16.02	19.9
chr5	14518316	14533930	AT5G36870_ATGSL09,atgsl9,gsl09,GSL09	.	+	9.12	11.33
chr3	10724990	10726414	AT3G28610_	.	+	10.77	13.38
chr1	19025642	19026769	AT1G51320_	.	+	13	16.15
chr1	19549331	19551282	AT1G52460_	.	+	11.1	13.79
chr4	15795985	15798254	AT4G32750_	.	-	75.4	93.66
chr5	26648951	26653073	AT5G66750_ATDDM1,CHA1,CHR01,CHR1,DDM1,SOM1,SOM4	.	+	31.04	38.56
chr2	9717791	9719472	AT2G22810_ACC4,ACS4,ATACS4	.	-	14.8	18.39
chr3	9020651	9021491	AT3G24690_	.	+	17.93	22.28
chr4	9017453	9022982	AT4G15890_	.	+	18.96	23.56
chr5	21984569	21984964	AT5G54165_	.	+	11.57	14.38
chr2	13791887	13793177	AT2G32487_	.	+	12.27	15.25
chr2	14940845	14945357	AT2G35600_ATBRXL1,BRXL1	.	-	9.96	12.38
chr1	29819142	29833016	AT1G79280_AtTPR,NUA	.	-	60.55	75.25
chr1	7654184	7655883	AT1G21790_	.	+	53.67	66.7
chr3	746655	748600	AT3G03240_	.	-	12.84	15.96
chr1	27745427	27749178	AT1G73805_SARD1	.	-	11.19	13.91
chr4	11914981	11916171	AT4G22660_	.	-	11.51	14.31
chr1	24782171	24784351	AT1G66440_	.	+	11.18	13.9
chr2	538250	539055	AT2G02120_LCR70,PDF2.1	.	+	14.22	17.68
chr4	6711386	6713512	AT4G10950_	.	-	23.02	28.62
chr3	18481237	18481722	AT3G49820_	.	+	21.33	26.52
chr4	9202352	9204078	AT4G16265_NRPB9B,NRPD9B,NRPE9B	.	-	44.43	55.24
chr2	16241189	16242917	AT2G38890_	.	+	8.91	11.08
chr2	8389800	8397862	AT2G19390_	.	-	49.39	61.41
chr4	9984386	9985805	AT4G17990_	.	-	11.62	14.45
chr2	6642300	6644037	AT2G15290_AtTic21,CIA5,PIC1,TIC21	.	-	64.24	79.88
chr1	22244963	22245814	AT1G60370_KUK	.	+	12.93	16.08
chr1	24016643	24019271	AT1G64625_	.	+	12.68	15.77
chr5	3066562	3070933	AT5G09860_AtHPR1,AtTHO1,HPR1,THO1	.	+	49.6	61.68
chr1	11040281	11043751	AT1G30970_SUF4	.	-	65.4	81.33
chr5	14066992	14074751	AT5G35930_	.	-	43.01	53.49
chr2	249687	250181	AT2G01554_	.	+	9.84	12.24
chr1	27462995	27463877	AT1G73000_PYL3,RCAR13	.	+	21.7	26.99
chr4	15364418	15367716	AT4G31750_WIN2	.	-	54.16	67.36
chr1	26861657	26863422	AT1G71260_ATWHY2,WHY2	.	-	59.11	73.52
chr3	1495597	1497469	AT3G05250_	.	+	67.96	84.53
chr4	10665294	10667318	AT4G19570_	.	+	10.9	13.56
chr5	14136550	14138628	AT5G35995_	.	-	62.33	77.54
chr3	5066879	5067960	AT3G15050_IQD10	.	-	14.99	18.65
chr2	9065338	9068093	AT2G21150_XCT	.	+	65.76	81.81
chr1	6905034	6906018	AT1G19890_ATMGH3,MGH3	.	+	17.28	21.5
chr2	19673293	19679711	AT2G48110_MED33B,REF4	.	+	46.15	57.42
chr1	11962746	11964832	AT1G33020_	.	+	10.35	12.88
chr1	2083311	2087131	AT1G06780_GAUT6	.	+	43.72	54.4
chr5	5715624	5716268	AT5G17340_	.	-	15.67	19.5
chr2	9592996	9594535	AT2G22590_	.	+	15.71	19.55
chr5	4415754	4420371	AT5G13690_CYL1,NAGLU	.	+	41.09	51.13
chr3	21465226	21466677	AT3G57970_	.	+	12.68	15.78
chr1	23742842	23745374	AT1G63990_SPO11-2	.	-	13.17	16.39
chr5	26434064	26437222	AT5G66130_ATRAD17,RAD17	.	+	43.25	53.82
chr4	545796	549261	AT4G01320_ATSTE24,STE24	.	+	56.61	70.45
chr3	19506891	19509390	AT3G52600_AtCWIN2,AtcwINV2,CWINV2	.	-	12.18	15.16
chr1	26529171	26530282	AT1G70390_	.	-	12.67	15.77
chr3	18657208	18658307	AT3G50330_HEC2	.	-	16.35	20.35
chr2	12689276	12689398	AT2G29679_	.	-	13.65	16.99
chr3	18380549	18387128	AT3G49600_ATUBP26,SUP32,UBP26	.	-	45.3	56.38
chr4	10961612	10964056	AT4G20310_	.	+	62.78	78.14
chr5	16253510	16254079	AT5G40595_	.	+	16.38	20.39
chr3	10788698	10790553	AT3G28740_CYP81D11	.	-	16.42	20.44
chr5	3974171	3978160	AT5G12290_DGS1	.	-	50.45	62.8
chr2	11263963	11265684	AT2G26480_UGT76D1	.	+	13.35	16.62
chr2	13889641	13891170	AT2G32750_	.	+	12.57	15.65
chr1	22261888	22264408	AT1G60420_AtNRX1,NRX1	.	+	49.61	61.76
chr2	15922557	15925623	AT2G38060_PHT4;2	.	-	11.67	14.53
chr3	19702456	19703976	AT3G53160_UGT73C7	.	-	16.08	20.02
chr2	8097420	8098827	AT2G18690_	.	+	11.79	14.68
chr1	17952859	17955336	AT1G48560_	.	+	47.94	59.69
chr2	16501623	16504304	AT2G39550_ATGGT-IB,GGB,PGGT-I	.	+	73.77	91.85
chr4	16776630	16776797	AT4G35263_	.	-	15.7	19.55
chr1	5243450	5248604	AT1G15240_	.	+	61.72	76.85
chr2	1535489	1536250	AT2G04420_	.	+	21.57	26.86
chr4	11707370	11709932	AT4G22100_BGLU3	.	-	8.88	11.06
chr2	440636	444276	AT2G01950_BRL2,VH1	.	-	13.6	16.94
chr1	12208308	12214182	AT1G33700_	.	-	9.93	12.37
chr1	20499950	20503841	AT1G54960_ANP2,MAPKKK2,NP2	.	+	22.91	28.54
chr5	9727454	9731341	AT5G27550_	.	-	18.55	23.11
chr4	9120867	9127938	AT4G16130_ARA1,ATISA1,ISA1	.	+	51.64	64.33
chr5	5240675	5243329	AT5G16040_	.	-	37.31	46.48
chr2	9045516	9047579	AT2G21090_	.	-	64.11	79.87
chr3	766745	767742	AT3G03290_	.	+	12.15	15.14
chr3	22823481	22826992	AT3G61680_	.	+	15.32	19.09
chr3	2708086	2709714	AT3G08900_RGP,RGP3	.	-	13.53	16.86
chr1	8874124	8874834	AT1G25310_MEE8	.	-	15.11	18.83
chr2	8455936	8459525	AT2G19520_ACG1,ATMSI4,FVE,MSI4,NFC04,NFC4	.	+	57.95	72.21
chr3	17876571	17878173	AT3G48270_CYP71A26	.	+	13.85	17.26
chr1	748102	749034	AT1G03106_	.	-	19.54	24.35
chr5	3924126	3930305	AT5G12150_	.	-	59.98	74.74
chr2	11178100	11182976	AT2G26260_3BETAHSD/D2,AT3BETAHSD/D2	.	+	49.55	61.75
chr1	23050445	23050940	AT1G62333_	.	+	11.81	14.72
chr1	19862878	19864650	AT1G53270_ABCG10	.	+	10.67	13.3
chr5	4326473	4331971	AT5G13480_FY	.	-	48.19	60.06
chr2	14337366	14338251	AT2G33870_ArRABA1h	.	-	18.1	22.56
chr3	19614007	19615745	AT3G52905_	.	-	47.82	59.6
chr4	11302685	11306601	AT4G21200_ATGA2OX8,GA2OX8	.	+	12.49	15.57
chr2	265044	265905	AT2G01580_	.	-	17.72	22.09
chr3	6967582	6970566	AT3G20000_TOM40	.	+	63.84	79.58
chr2	6980450	6982101	AT2G16050_	.	+	13.66	17.03
chr3	4251014	4254267	AT3G13222_GIP1	.	-	37.14	46.3
chr3	21464702	21466627	AT3G57965_	.	-	11.83	14.75
chr1	7295274	7296518	AT1G20940_	.	-	16.24	20.25
chr2	9270114	9270597	AT2G21690_	.	-	10.16	12.67
chr4	7297808	7299930	AT4G12270_	.	+	13.36	16.66
chr3	1301391	1303376	AT3G04750_	.	-	58.64	73.13
chr5	19626362	19626790	AT5G48420_	.	-	28.08	35.02
chr1	112263	113947	AT1G01280_CYP703,CYP703A2	.	+	17.3	21.58
chr2	8838854	8839700	AT2G20515_	.	-	17.46	21.78
chr4	11994014	11996229	AT4G22850_	.	+	54.55	68.05
chr5	17977177	17978638	AT5G44578_	.	+	8.8	10.98
chr1	954525	956097	AT1G03790_AtTZF4,SOM,TZF4	.	+	17.36	21.66
chr4	2489417	2495766	AT4G04910_NSF	.	-	44.09	55.01
chr1	13035294	13036037	AT1G35440_CYCT1;1	.	-	17.92	22.36
chr2	9202753	9205368	AT2G21480_	.	-	11.62	14.5
chr5	26946754	26949161	AT5G67550_	.	-	10.81	13.49
chr3	7391438	7395041	AT3G21090_ABCG15	.	-	11.25	14.04
chr1	18136705	18137946	AT1G49030_	.	+	16.01	19.98
chr1	10974445	10976298	AT1G30840_ATPUP4,PUP4	.	+	18.43	23
chr2	7342607	7347408	AT2G16940_	.	-	59.17	73.84
chr4	5311093	5312406	AT4G08380_	.	-	8.54	10.66
chr3	22116109	22118241	AT3G59870_	.	-	75.72	94.5
chr1	28164840	28170054	AT1G75010_ARC3	.	-	48.54	60.58
chr1	8027294	8028168	AT1G22690_	.	+	15.27	19.06
chr1	83045	84864	AT1G01190_CYP78A8	.	-	19.62	24.49
chr1	4200876	4206404	AT1G12360_KEU,SEC11	.	+	56.16	70.1
chr4	13489835	13492054	AT4G26800_	.	+	41.23	51.47
chr3	17923678	17925589	AT3G48400_	.	+	12.47	15.57
chr4	7814202	7814274	AT4G13445_	.	+	6.27	7.83
chr2	10462910	10463224	AT2G24617_	.	+	20.92	26.12
chr2	12209896	12215895	AT2G28520_VHA-A1	.	+	60.52	75.56
chr3	9816581	9823186	AT3G26720_	.	+	52.34	65.35
chr4	15165156	15172738	AT4G31210_	.	+	43	53.69
chr4	12223953	12225323	AT4G23410_TET5	.	+	14.15	17.67
chr3	1479538	1482042	AT3G05210_ERCC1,UVR7	.	+	67.33	84.07
chr1	20273567	20275574	AT1G54310_	.	+	54.94	68.6
chr5	17336330	17337872	AT5G43180_	.	-	13.58	16.96
chr1	27061486	27064496	AT1G71900_	.	+	70.53	88.08
chr4	10401910	10404248	AT4G18990_XTH29	.	-	12.45	15.55
chr1	4947819	4948400	AT1G14455_	.	-	15.5	19.36
chr3	20747787	20750184	AT3G55940_	.	+	15.82	19.76
chr2	17461655	17464161	AT2G41850_ADPG2,PGAZAT	.	-	16.02	20.01
chr3	16011621	16020254	AT3G44340_CEF	.	-	62.26	77.76
chr3	10674508	10675724	AT3G28470_ATMYB35,MYB35,TDF1	.	-	11.64	14.54
chr4	11517353	11519765	AT4G21680_AtNPF7.2,NPF7.2,NRT1.8	.	-	11.96	14.94
chr5	25817092	25821530	AT5G64580_EMB3144	.	-	41.96	52.41
chr4	17023837	17025863	AT4G35950_ARAC6,ATRAC6,ATROP5,RAC2,RAC6,ROP5	.	-	56.82	70.97
chr3	5649932	5651056	AT3G16590_	.	-	12.72	15.89
chr2	17672253	17675019	AT2G42450_	.	-	40.25	50.28
chr1	23463069	23466451	AT1G63250_	.	-	32.18	40.2
chr2	17294453	17294728	AT2G41473_	.	-	18.25	22.8
chr4	9148059	9153292	AT4G16150_	.	+	49.98	62.44
chr1	24406542	24409068	AT1G65630_DEG3,DegP3	.	-	10.66	13.32
chr2	12295327	12297117	AT2G28660_	.	+	14.95	18.68
chr5	7621568	7623367	AT5G22810_	.	+	11.9	14.87
chr4	11949164	11953648	AT4G22753_ATSMO1-3,SMO1-3	.	-	36.91	46.12
chr2	13413764	13416536	AT2G31500_CPK24	.	+	12.25	15.31
chr3	4709272	4709814	AT3G14185_	.	-	12.45	15.56
chr5	25982254	25986326	AT5G65050_AGL31,MAF2	.	+	52.11	65.12
chr5	23789522	23791681	AT5G58910_LAC16	.	-	14.92	18.65
chr4	32893	33718	AT4G00080_UNE11	.	+	22.28	27.85
chr1	8871568	8872386	AT1G25300_	.	+	19.91	24.89
chr4	6955601	6958553	AT4G11440_	.	+	34.27	42.84
chr5	24331670	24333045	AT5G60520_	.	-	11.59	14.49
chr5	594179	594867	AT5G02640_	.	-	18.99	23.74
chr2	1621788	1624593	AT2G04650_	.	-	26.86	33.58
chr3	4146499	4154895	AT3G12980_ATHPCAT4,HAC5	.	+	51.69	64.62
chr1	9596360	9603255	AT1G27595_	.	+	39.89	49.87
chr4	2720561	2723125	AT4G05330_AGD13	.	-	39.92	49.91
chr5	24306294	24307716	AT5G60440_AGL62	.	+	12.38	15.48
chr2	1315860	1316296	AT2G04046_	.	+	16.89	21.12
chr1	6145926	6148940	AT1G17850_	.	-	47.89	59.88
chr5	4501447	4506188	AT5G13960_KYP,SDG33,SUVH4	.	+	44.65	55.83
chr1	541335	542240	AT1G02570_	.	+	13.89	17.37
chr3	783332	786209	AT3G03330_	.	-	47.48	59.37
chr3	5728016	5729174	AT3G16820_	.	-	12.33	15.42
chr1	26079956	26081727	AT1G69370_cm-3,CM3	.	+	54.86	68.6
chr5	16330115	16331026	AT5G40790_	.	-	26.26	32.84
chr3	18112721	18114070	AT3G48840_	.	-	10.25	12.82
chr1	28914284	28914952	AT1G76952_IDL5	.	-	10.21	12.77
chr5	3582540	3586986	AT5G11240_	.	+	40.87	51.11
chr1	14587852	14588419	AT1G38950_	.	+	9.89	12.37
chr3	5920399	5926928	AT3G17340_	.	-	33.59	42.01
chr1	22339809	22342337	AT1G60650_AtRZ-1b,RZ-1b	.	+	67.7	84.67
chr1	739679	744184	AT1G03090_MCCA	.	+	46.11	57.67
chr1	8076573	8079116	AT1G22830_	.	+	53.25	66.6
chr2	7131520	7132803	AT2G16450_	.	-	13.83	17.3
chr1	10435374	10437506	AT1G29810_	.	-	41.3	51.66
chr4	13286774	13288971	AT4G26240_	.	-	73.47	91.9
chr5	19958873	19960544	AT5G49230_HRB1	.	-	71.07	88.91
chr4	11345974	11349653	AT4G21326_ATSBT3.12,SBT3.12	.	+	9.99	12.5
chr3	16632440	16634488	AT3G45330_LecRK-I.1	.	-	9.87	12.35
chr4	9551428	9555784	AT4G16970_	.	-	27.99	35.02
chr1	3104588	3106290	AT1G09580_	.	+	65.23	81.61
chr4	6200089	6201215	AT4G09870_	.	+	11.62	14.54
chr4	17055321	17056704	AT4G36060_bHLH11	.	+	16.67	20.86
chr1	30169456	30171101	AT1G80230_	.	-	75.49	94.46
chr5	6244005	6246241	AT5G18720_	.	+	9.62	12.04
chr1	27476565	27478534	AT1G73050_	.	-	10.45	13.08
chr1	24583820	24586681	AT1G66040_ORTH4,VIM4	.	-	3.45	4.32
chr5	24188600	24189724	AT5G60060_	.	-	15.85	19.84
chr5	8134301	8135991	AT5G24070_	.	-	15.41	19.29
chr1	23831033	23832863	AT1G64210_	.	+	16.64	20.83
chr3	4595876	4600469	AT3G13930_	.	+	51.08	63.94
chr3	7673276	7674839	AT3G21770_	.	+	14.45	18.09
chr1	1061457	1063784	AT1G04110_AtSDD1,SDD1	.	-	12.98	16.25
chr1	27763685	27766364	AT1G73840_ESP1	.	-	68.31	85.51
chr2	18067172	18067802	AT2G43510_ATTI1,TI1	.	+	18.22	22.81
chr3	21703390	21706079	AT3G58670_	.	-	66.7	83.5
chr4	13844065	13846746	AT4G27760_FEY,FEY3	.	+	65.66	82.21
chr1	17572451	17573159	AT1G47760_AGL102	.	+	10.82	13.55
chr4	5811256	5811654	AT4G09100_	.	+	19.19	24.03
chr2	10576856	10579230	AT2G24830_	.	-	49.09	61.47
chr4	2203424	2204264	AT4G04423_	.	+	5.74	7.19
chr1	13205381	13208252	AT1G35670_ATCDPK2,ATCPK11,CDPK2,CPK11	.	+	53.44	66.92
chr3	10527477	10528961	AT3G28223_	.	-	12.44	15.58
chr3	884133	886410	AT3G03650_EDA5	.	-	11.13	13.94
chr2	6677287	6677819	AT2G15340_	.	+	9.94	12.45
chr1	3012762	3015091	AT1G09330_ECH	.	-	79.55	99.62
chr1	17805761	17808885	AT1G48230_	.	+	64.24	80.45
chr3	3786386	3793657	AT3G11960_	.	+	59.62	74.67
chr4	17018929	17021060	AT4G35930_AtFBS4,FBS4	.	+	53.08	66.48
chr5	4002775	4008804	AT5G12370_SEC10	.	-	58.24	72.95
chr1	26552576	26554437	AT1G70450_	.	+	11.67	14.62
chr2	17374083	17376238	AT2G41670_SIN2	.	+	43.44	54.42
chr3	2157974	2160623	AT3G06850_BCE2,DIN3,LTA1	.	-	39.12	49.01
chr3	19812977	19815430	AT3G53450_LOG4	.	-	10.87	13.62
chr1	5424242	5424576	AT1G15757_	.	-	12.49	15.65
chr1	24241723	24244991	AT1G65270_	.	+	62.91	78.82
chr5	1795294	1799527	AT5G05970_NEDD1	.	+	44.26	55.46
chr3	3628594	3630536	AT3G11530_	.	-	83.39	104.49
chr5	16301075	16301520	AT5G40730_AGP24,ATAGP24	.	+	14.1	17.67
chr5	8541778	8542449	AT5G24860_ATFPF1,FPF1	.	+	15.72	19.7
chr4	10615796	10623521	AT4G19490_ATVPS54,VPS54	.	+	67	83.96
chr2	18081331	18082767	AT2G43590_	.	-	15	18.8
chr1	8379454	8381965	AT1G23700_	.	-	10.97	13.75
chr1	21122551	21124234	AT1G56420_	.	-	58.64	73.49
chr3	6914910	6916142	AT3G19890_	.	-	11.04	13.84
chr5	4822676	4823581	AT5G14900_	.	-	18.93	23.73
chr2	18684116	18686145	AT2G45320_	.	-	57.04	71.5
chr2	6387624	6389628	AT2G14860_	.	-	58.76	73.66
chr5	18032864	18036894	AT5G44700_EDA23,GSO2	.	-	10.95	13.73
chr3	2524420	2526229	AT3G07920_	.	-	11.62	14.57
chr1	30042092	30044175	AT1G79860_ATROPGEF12,MEE64,ROPGEF12	.	-	15.64	19.61
chr4	14228719	14230288	AT4G28815_	.	+	13.47	16.89
chr2	11813949	11816002	AT2G27700_	.	-	14.65	18.37
chr1	11036180	11037508	AT1G30950_UFO	.	+	13.23	16.59
chr3	5491406	5493629	AT3G16200_	.	-	70.07	87.86
chr1	21185662	21188369	AT1G56550_RGXT3	.	-	10.94	13.72
chr5	8028378	8030816	AT5G23810_AAP7	.	+	12.59	15.79
chr1	24726812	24728614	AT1G66320_	.	-	6.21	7.79
chr4	10931493	10934212	AT4G20240_CYP71A27	.	-	12.27	15.39
chr4	5387652	5391507	AT4G08480_MAPKKK9,MEKK2,SUMM1	.	-	78.09	97.94
chr5	19009098	19009178	AT5G46845_MIR160,MIR160C	.	-	21.59	27.08
chr1	23535016	23536467	AT1G63460_ATGPX8,GPX8	.	+	60.77	76.22
chr1	4624171	4624344	AT1G13485_	.	-	5.81	7.29
chr5	25338699	25340096	AT5G63170_	.	-	13.71	17.2
chr1	17095980	17098006	AT1G45170_	.	-	65.79	82.53
chr3	3638195	3639197	AT3G11550_CASP2	.	+	15.12	18.97
chr1	27742128	27743565	AT1G73770_	.	+	64.3	80.67
chr1	9972384	9973793	AT1G28400_	.	-	15.66	19.65
chr5	4315759	4318360	AT5G13460_IQD11	.	+	41.26	51.77
chr5	23154965	23161746	AT5G57160_ATLIG4,LIG4	.	-	37.33	46.84
chr3	16789980	16790582	AT3G45730_	.	+	18.52	23.24
chr1	10094173	10094244	AT1G28810_	.	+	60.34	75.72
chr5	14881560	14883989	AT5G37478_	.	+	11.21	14.07
chr1	12195722	12195970	AT1G33640_	.	-	10.15	12.74
chr1	28602811	28603929	AT1G76240_	.	-	20.62	25.88
chr1	20323036	20328067	AT1G54440_	.	+	57.36	71.99
chr4	13048377	13051169	AT4G25550_	.	+	71.23	89.4
chr1	18166147	18170105	AT1G49100_	.	-	10.34	12.98
chr5	26705862	26708676	AT5G66870_ASL1,LBD36	.	+	16.05	20.15
chr2	14754271	14756323	AT2G35010_ATO1,TO1	.	+	73.39	92.13
chr4	11789332	11791191	AT4G22305_	.	-	65.62	82.38
chr1	7620001	7624136	AT1G21700_ATSWI3C,CHB4,SWI3C	.	-	55.75	69.99
chr3	2983934	2986455	AT3G09730_	.	+	29.59	37.15
chr1	2723824	2733613	AT1G08600_ATRX,CHR20	.	+	42.39	53.22
chr3	1417893	1423664	AT3G05090_LRS1	.	-	64.03	80.39
chr5	1565447	1566391	AT5G05280_DAF	.	-	13.65	17.14
chr5	1565447	1566391	AT5G05282_CPuORF64	.	-	13.65	17.14
chr1	19754214	19755843	AT1G53023_	.	-	10.4	13.06
chr2	15608827	15612934	AT2G37160_	.	+	55.91	70.2
chr5	17348876	17352747	AT5G43230_	.	+	11.69	14.68
chr3	16965889	16967345	AT3G46190_	.	+	11.1	13.94
chr5	15475786	15476871	AT5G38670_	.	+	18.14	22.78
chr4	234597	237582	AT4G00540_ATMYB3R2,MYB3R-2,MYB3R2,PC-MYB2	.	-	10.55	13.25
chr3	4764149	4766586	AT3G14290_PAE2	.	+	63.78	80.09
chr2	13186544	13187253	AT2G30984_	.	-	12.38	15.55
chr5	16155086	16155683	AT5G40382_	.	-	13.59	17.07
chr2	19418471	19422241	AT2G47300_POP1	.	+	34.88	43.81
chr4	6550978	6551834	AT4G10603_	.	+	8.35	10.49
chr2	16491143	16493151	AT2G39510_UMAMIT14	.	-	16.59	20.84
chr1	9047433	9054589	AT1G26170_	.	-	37.25	46.79
chr1	18855147	18856337	AT1G50870_	.	+	13.19	16.57
chr1	1373234	1375762	AT1G04870_ATPRMT10,PRMT10	.	-	55.64	69.89
chr1	11655156	11656073	AT1G32320_ATMKK10,MKK10	.	+	16.47	20.69
chr3	842499	845043	AT3G03530_NPC4	.	-	14.4	18.09
chr5	1178644	1180036	AT5G04260_WCRKC2	.	-	79.65	100.05
chr1	6996210	6997943	AT1G20180_	.	+	12.68	15.93
chr1	7938251	7940592	AT1G22490_	.	-	13.18	16.56
chr5	21048191	21052012	AT5G51800_	.	+	15.05	18.91
chr1	918299	920507	AT1G03687_	.	+	60.85	76.45
chr1	22155582	22158065	AT1G60090_BGLU4	.	+	11.42	14.35
chr1	22331106	22333524	AT1G60620_ATRPAC43,RPAC43	.	+	56.55	71.05
chr3	6419031	6422002	AT3G18660_GUX1,PGSIP1	.	-	9.66	12.14
chr2	13836234	13839513	AT2G32610_ATCSLB01,ATCSLB1,CSLB01,CSLB01	.	+	10.36	13.02
chr4	11017629	11021280	AT4G20430_	.	-	24.62	30.94
chr2	15870220	15870697	AT2G37925_COPT4	.	-	20.29	25.5
chr4	9775841	9777835	AT4G17540_	.	+	48.61	61.09
chr5	1079037	1079869	AT5G04000_	.	-	19.89	25
chr1	5824848	5828233	AT1G17040_ATSHA,SHA,STATLA	.	+	44.54	55.98
chr5	4305125	4307513	AT5G13430_	.	-	71.37	89.7
chr3	3346578	3351023	AT3G10700_GalAK	.	-	38.34	48.19
chr5	10207353	10213598	AT5G28237_	.	-	8.75	11
chr1	26446136	26448009	AT1G70220_	.	-	16.34	20.54
chr3	4862153	4862680	AT3G14480_	.	+	18.48	23.23
chr2	13580600	13581112	AT2G31940_	.	+	16.45	20.68
chr3	3549771	3551661	AT3G11325_	.	-	16.06	20.19
chr1	5617811	5619334	AT1G16445_	.	+	50.05	62.92
chr3	5325290	5327639	AT3G15720_	.	-	12.67	15.93
chr1	2060444	2067323	AT1G06720_	.	-	47.48	59.69
chr1	3624035	3627082	AT1G10880_	.	-	15.82	19.89
chr1	22065617	22066973	AT1G59940_ARR3	.	-	11.81	14.85
chr3	1710013	1712165	AT3G05770_	.	-	10.06	12.65
chr1	8496057	8496566	AT1G24000_	.	-	15.93	20.03
chr3	7308504	7308962	AT3G20865_AGP40	.	-	12.08	15.19
chr4	15385280	15386982	AT4G31805_POLAR	.	+	13.74	17.28
chr5	19700640	19701022	AT5G48595_	.	+	9.04	11.37
chr5	20534173	20537117	AT5G50430_UBC33	.	-	58.92	74.1
chr1	3647894	3655590	AT1G10930_ATRECQ4A,ATSGS1,RECQ4A	.	-	30.49	38.35
chr4	13771185	13772594	AT4G27590_	.	+	13.53	17.02
chr5	22606254	22606491	AT5G55855_	.	+	13.84	17.41
chr5	6939813	6942908	AT5G20510_AL5	.	-	53.68	67.52
chr3	11359512	11360208	AT3G29560_	.	-	4.76	5.99
chr4	18280098	18284930	AT4G39280_	.	-	42.92	53.99
chr5	9527741	9528604	AT5G27070_AGL53	.	+	3.75	4.72
chr4	9722356	9724640	AT4G17420_	.	-	67.7	85.17
chr1	28016045	28017711	AT1G74550_CYP98A9	.	+	11.5	14.47
chr3	19971019	19973769	AT3G53940_	.	-	49.9	62.78
chr5	5728789	5730376	AT5G17400_ER-ANT1	.	-	62.53	78.67
chr1	25209394	25213253	AT1G67325_	.	-	59.12	74.38
chr1	14027292	14030500	AT1G36990_	.	-	60.2	75.74
chr5	2880423	2881597	AT5G09280_	.	-	17.23	21.68
chr2	6824242	6825576	AT2G15660_AGL95	.	-	11.84	14.9
chr1	4010779	4013125	AT1G11890_ATSEC22,SEC22	.	+	63.96	80.48
chr2	5497132	5497389	AT2G13272_	.	+	5.99	7.54
chr2	16836210	16839189	AT2G40316_	.	+	65.67	82.64
chr5	4747860	4753592	AT5G14720_	.	-	57.07	71.82
chr5	26744257	26745362	AT5G66990_RKD3	.	-	15.08	18.98
chr2	193701	199248	AT2G01440_	.	-	45.33	57.05
chr2	17076312	17082433	AT2G40930_ATUBP5,PDE323,UBP5	.	-	61.1	76.9
chr2	8971712	8974485	AT2G20840_AtSCAMP3,SCAMP3	.	-	53.28	67.06
chr2	18664530	18666413	AT2G45260_	.	-	39.42	49.62
chr1	12560460	12561315	AT1G34392_	.	-	10.89	13.71
chr5	1815128	1816037	AT5G06040_	.	+	11.97	15.07
chr2	15810581	15814208	AT2G37700_	.	-	12.24	15.41
chr3	2787981	2793532	AT3G09100_	.	-	64.82	81.6
chr1	1824548	1826101	AT1G06020_	.	+	17.53	22.07
chr4	2020436	2023992	AT4G04180_	.	+	32.67	41.13
chr3	6017212	6019666	AT3G17590_BSH,CHE1	.	-	52.62	66.25
chr1	23379665	23382989	AT1G63057_	.	+	9.45	11.9
chr2	4303281	4303967	AT2G10930_	.	-	12.23	15.4
chr3	10796716	10803237	AT3G28770_	.	+	9.72	12.24
chr2	11689591	11689953	AT2G27315_	.	-	10.53	13.26
chr2	8465768	8469116	AT2G19560_AtTHP1,EER5,ESSP1	.	-	52.96	66.68
chr3	21738460	21742517	AT3G58780_AGL1,SHP1	.	+	10.45	13.16
chr3	18887614	18888047	AT3G50808_	.	-	10.72	13.5
chr5	18723116	18726200	AT5G46190_	.	-	75.67	95.28
chr5	294313	301984	AT5G01770_ATRAPTOR1A,RAPTOR1A,RAPTOR2	.	-	38.04	47.9
chr5	20910244	20913451	AT5G51480_SKS2	.	+	10.06	12.67
chr5	16041919	16043494	AT5G40090_CHL1	.	-	11.41	14.37
chr4	6545340	6546401	AT4G10595_LCR2	.	+	10.02	12.62
chr3	20010927	20013693	AT3G54030_BSK6	.	+	37.2	46.85
chr3	729768	730467	AT3G03160_	.	+	143.73	181.01
chr3	7518924	7519477	AT3G21351_	.	+	10.94	13.78
chr3	18375269	18375784	AT3G49580_LSU1	.	-	19.19	24.17
chr1	29181110	29182261	AT1G77650_	.	+	15.18	19.12
chr5	1938781	1944357	AT5G06350_	.	+	50.56	63.68
chr5	25050684	25051858	AT5G62380_ANAC101,NAC101,VND6	.	+	13.17	16.59
chr5	14056437	14056904	AT5G35920_CYP79A4P	.	+	12.09	15.23
chr1	18617593	18621739	AT1G50260_NTMC2T5.1,NTMC2TYPE5.1	.	-	53.38	67.24
chr5	8279179	8279964	AT5G24316_	.	-	16.36	20.61
chr1	2367437	2368385	AT1G07645_ATDSI-1VOC,DSI-1VOC	.	-	17.55	22.11
chr5	2720669	2727167	AT5G08440_	.	+	57.56	72.51
chr5	9120688	9120960	AT5G26114_	.	-	15.2	19.15
chr5	560135	560860	AT5G02510_	.	+	17.62	22.2
chr2	353457	355522	AT2G01818_	.	-	11.42	14.39
chr3	7021332	7023279	AT3G20110_CYP705A20	.	+	14.88	18.75
chr1	10454482	10455785	AT1G29860_ATWRKY71,WRKY71	.	+	12.8	16.13
chr2	13476093	13477547	AT2G31690_DALL5	.	-	15.8	19.91
chr1	2542702	2547946	AT1G08130_ATLIG1,LIG1	.	-	48.03	60.52
chr1	11601781	11605060	AT1G32200_ACT1,ATS1	.	-	68.03	85.72
chr2	1726138	1727268	AT2G04920_	.	+	11.49	14.48
chr2	12394256	12394915	AT2G28870_	.	-	13.64	17.19
chr4	14135526	14137953	AT4G28620_ABCB24,ATATM2,ATM2	.	-	13.1	16.51
chr3	8894877	8895140	AT3G24465_	.	-	19.02	23.97
chr1	8734570	8737315	AT1G24650_	.	+	10.33	13.02
chr1	24812837	24816620	AT1G66510_	.	+	47.61	60
chr4	5598115	5600312	AT4G08770_Prx37	.	-	11.75	14.81
chr4	7792219	7795824	AT4G13410_ATCSLA15,CSLA15	.	-	12.09	15.24
chr4	8208748	8213237	AT4G14250_	.	-	11.59	14.61
chr1	18321295	18322284	AT1G49500_	.	-	8.4	10.59
chr3	19158971	19162379	AT3G51650_	.	+	36.39	45.87
chr2	9899927	9901439	AT2G23260_UGT84B1	.	-	14.92	18.81
chr3	7949116	7950396	AT3G22421_	.	-	12.77	16.1
chr2	11740634	11745011	AT2G27460_	.	+	58.74	74.05
chr4	14348801	14349701	AT4G29110_	.	+	18.37	23.16
chr4	12580559	12581165	AT4G24265_	.	-	16.45	20.74
chr4	13406733	13407973	AT4G26560_CBL7	.	-	13.07	16.48
chr1	21420309	21420803	AT1G57830_	.	+	21.47	27.07
chr5	20389997	20393263	AT5G50130_	.	+	13.53	17.06
chr2	17198282	17199320	AT2G41240_BHLH100	.	-	18.17	22.91
chr5	15036197	15037574	AT5G37800_ATRSL1,RSL1	.	+	10.46	13.19
chr4	17579657	17582022	AT4G37390_AUR3,BRU6,GH3-2,GH3.2,YDK1	.	+	14.41	18.17
chr1	1176921	1178407	AT1G04380_	.	-	10.92	13.77
chr3	19592	20719	AT3G01070_AtENODL16,ENODL16	.	+	14.75	18.6
chr1	9854546	9860158	AT1G28210_ATJ1	.	+	35.1	44.26
chr5	5985365	5987165	AT5G18090_	.	+	11.18	14.1
chr2	8496720	8498708	AT2G19660_	.	-	13.9	17.53
chr2	16282120	16284868	AT2G38995_	.	+	11.83	14.92
chr5	18671397	18673551	AT5G46040_	.	-	14.78	18.64
chr5	9693262	9694840	AT5G27460_	.	-	76.65	96.66
chr4	10022205	10027415	AT4G18050_ABCB9,PGP9	.	+	12.63	15.93
chr2	1099070	1100202	AT2G03610_	.	+	8.53	10.76
chr4	17457135	17459770	AT4G37050_AtPLAIVC,PLA,PLAIII{beta},PLP4	.	-	11.21	14.14
chr1	21690962	21694447	AT1G58390_	.	-	10.02	12.64
chr3	22349527	22350371	AT3G60490_	.	+	19.43	24.51
chr1	9874247	9875579	AT1G28250_	.	+	71.08	89.66
chr3	7331721	7334029	AT3G20930_ORRM1	.	+	56.54	71.32
chr3	21587362	21588002	AT3G58330_	.	-	7.91	9.98
chr4	10257078	10258943	AT4G18630_	.	+	15.98	20.16
chr1	28805235	28810557	AT1G76740_	.	+	14.22	17.94
chr5	7551429	7553452	AT5G22730_	.	-	58.86	74.25
chr1	17540775	17541089	AT1G47680_	.	+	18.15	22.9
chr3	5539788	5546449	AT3G16340_ABCG29,AtABCG29,ATPDR1,PDR1	.	+	9.93	12.53
chr1	1569192	1572280	AT1G05370_	.	-	9.89	12.48
chr5	6966178	6968033	AT5G20600_	.	-	77.92	98.31
chr1	7710423	7710725	AT1G21925_	.	-	8.36	10.55
chr1	9508745	9510066	AT1G27380_RIC2	.	-	12.83	16.19
chr2	12805724	12809386	AT2G30010_TBL45	.	+	12.79	16.14
chr1	2998100	3001315	AT1G09280_	.	-	50.27	63.43
chr4	6062978	6063118	AT4G09587_	.	+	18.25	23.03
chr5	517212	519756	AT5G02410_ALG10	.	-	56.87	71.76
chr2	14365177	14365632	AT2G34000_	.	+	16.11	20.33
chr5	9578757	9582752	AT5G27220_	.	+	10.15	12.81
chr1	28223869	28228975	AT1G75210_	.	+	55.64	70.21
chr4	14433991	14434524	AT4G29300_LCR27	.	-	14.16	17.87
chr2	13829420	13833209	AT2G32590_EMB2795	.	-	21.76	27.46
chr1	23995971	23998720	AT1G64600_	.	+	45.05	56.85
chr4	7999714	8000222	AT4G13790_SAUR25	.	-	11.56	14.59
chr4	18411265	18411338	AT4G39672_	.	+	7.97	10.06
chr2	879247	881471	AT2G03010_	.	+	40.25	50.8
chr4	6104446	6106607	AT4G09660_	.	+	3.31	4.18
chr4	13281937	13283402	AT4G26210_	.	+	73.31	92.53
chr4	959964	963517	AT4G02180_	.	+	11.93	15.06
chr4	12949664	12951234	AT4G25310_	.	+	13.57	17.13
chr5	25308572	25310973	AT5G63090_LOB	.	-	14.18	17.9
chr1	4031574	4034078	AT1G11940_	.	-	39.62	50.01
chr4	16182752	16183533	AT4G33720_	.	+	18.26	23.05
chr1	29088697	29093264	AT1G77410_BGAL16	.	-	19.02	24.01
chr3	10654470	10655388	AT3G28420_	.	-	10.21	12.89
chr1	21082863	21085651	AT1G56310_	.	+	55	69.43
chr3	19641306	19643282	AT3G52970_CYP76G1	.	-	16.64	21.01
chr3	7413847	7418410	AT3G21160_MANIA,MNS2	.	-	50.35	63.57
chr4	6192512	6193130	AT4G09850_	.	+	13.58	17.15
chr1	3871778	3872836	AT1G11510_	.	-	10.8	13.64
chr1	12917149	12917763	AT1G35230_AGP5	.	+	16.62	20.99
chr3	1285524	1286562	AT3G04720_AtPR4,HEL,PR-4,PR4	.	-	15.17	19.16
chr1	8648201	8648995	AT1G24390_	.	+	11.06	13.97
chr5	24438271	24442287	AT5G60760_	.	+	12.96	16.37
chr1	25932998	25935030	AT1G68980_	.	+	53.63	67.74
chr1	3363504	3366488	AT1G10270_GRP23	.	+	59.37	74.99
chr1	1106428	1108715	AT1G04190_TPR3	.	-	59.37	75
chr5	21607507	21609418	AT5G53280_PDV1	.	+	65.17	82.33
chr3	18465679	18466376	AT3G49780_ATPSK3,ATPSK4,PSK4	.	+	16.55	20.91
chr3	3631887	3637955	AT3G11540_SPY	.	+	51.3	64.81
chr4	10061373	10062841	AT4G18170_ATWRKY28,WRKY28	.	+	18.52	23.4
chr3	20200688	20203782	AT3G54580_	.	-	6.71	8.48
chr3	568047	570103	AT3G02650_	.	+	51.43	64.99
chr3	15601868	15603888	AT3G43700_ATBPM6,BPM6	.	+	57.23	72.32
chr5	5845934	5847653	AT5G17720_	.	+	10.99	13.89
chr1	20422831	20423754	AT1G54720_	.	+	14.44	18.25
chr3	8373947	8374708	AT3G23380_RIC5	.	+	10.04	12.69
chr2	14003250	14006017	AT2G32990_AtGH9B8,GH9B8	.	+	12.77	16.14
chr1	19781368	19782219	AT1G53080_	.	+	15.84	20.02
chr1	653765	654343	AT1G02900_ATRALF1,RALF1,RALFL1	.	-	13.83	17.48
chr1	22090238	22093060	AT1G59990_EMB3108,HS3,RH22	.	-	46.11	58.28
chr1	8552775	8553385	AT1G24159_	.	+	12.76	16.13
chr4	15049824	15051665	AT4G30930_NFD1	.	-	68.35	86.4
chr2	12262013	12263415	AT2G28610_PRS,PRS1,WOX3	.	+	13.62	17.22
chr1	6833885	6836578	AT1G19780_ATCNGC8,CNGC8	.	-	12.78	16.16
chr1	27603655	27611068	AT1G73430_	.	+	52.84	66.81
chr1	1339892	1340327	AT1G04778_	.	+	15.31	19.36
chr4	9350039	9352707	AT4G16600_PGSIP8	.	+	14.7	18.59
chr5	7968259	7968502	AT5G23640_	.	-	4.3	5.44
chr3	18949645	18950221	AT3G51020_	.	+	16.17	20.45
chr4	16438524	16440641	AT4G34380_	.	+	13.56	17.15
chr5	12738898	12739212	AT5G33439_	.	-	10.27	12.99
chr5	15397740	15401095	AT5G38460_	.	-	53.35	67.47
chr3	10540646	10541571	AT3G28280_	.	-	16.39	20.73
chr2	13853758	13856112	AT2G32660_AtRLP22,RLP22	.	-	10.91	13.8
chr2	12418017	12418454	AT2G28920_	.	+	12.72	16.09
chr5	13761965	13763944	AT5G35580_	.	+	13.02	16.47
chr1	25556426	25558522	AT1G68185_	.	+	56.34	71.26
chr1	4398375	4405605	AT1G12930_	.	-	61.69	78.03
chr5	1524841	1526199	AT5G05150_ATATG18E,ATG18E,G18E	.	-	12.79	16.18
chr1	11414749	11416444	AT1G31817_NFD3	.	-	51.62	65.3
chr5	6195917	6202166	AT5G18620_CHR17	.	-	42.41	53.65
chr5	9793790	9798961	AT5G27680_RECQSIM	.	-	26.71	33.79
chr4	18359373	18361170	AT4G39470_	.	-	57.64	72.92
chr3	19832472	19834073	AT3G53490_	.	+	58.91	74.53
chr4	12437108	12441968	AT4G23940_ARC1,FtsHi1	.	+	35.32	44.69
chr2	10771694	10774294	AT2G25300_	.	-	49.61	62.77
chr1	17668285	17669713	AT1G47940_	.	+	7.38	9.34
chr1	21907177	21907955	AT1G59630_	.	-	11.94	15.11
chr4	7484837	7486801	AT4G12710_	.	-	73.19	92.61
chr5	5375455	5375999	AT5G16453_	.	-	11.07	14.01
chr2	18321994	18323121	AT2G44370_	.	-	14.8	18.73
chr2	9721231	9721425	AT2G22820_	.	-	12.5	15.82
chr4	11339048	11340070	AT4G21310_	.	-	14.76	18.68
chr3	22471769	22473971	AT3G60820_PBF1	.	-	76.59	96.92
chr5	15594674	15597885	AT5G38970_ATBR6OX,BR6OX,BR6OX1,CYP85A1	.	-	11.18	14.15
chr1	104491	105330	AT1G01250_	.	-	19.54	24.73
chr4	543970	545547	AT4G01310_	.	-	78.4	99.22
chr2	15482003	15483711	AT2G36885_	.	-	44.88	56.8
chr2	158277	160901	AT2G01330_	.	-	59.52	75.33
chrCp	30466	30538	ATCG00250_TRNE	.	-	66.1	83.66
chr2	17782308	17785063	AT2G42710_	.	+	61.55	77.91
chr3	18329387	18331431	AT3G49420_	.	+	41.63	52.7
chr3	8862840	8864914	AT3G24420_	.	-	11.95	15.13
chr2	6501126	6501704	AT2G15025_	.	-	17.89	22.65
chr1	26032827	26035504	AT1G69250_	.	+	54.99	69.62
chr1	17969395	17970282	AT1G48605_ATHAL3B,HAL3,HAL3B	.	-	14.2	17.98
chr2	18773541	18775654	AT2G45550_CYP76C4	.	-	11.94	15.12
chr5	22269859	22271777	AT5G54820_	.	+	11.45	14.5
chr3	17650260	17651765	AT3G47836_	.	-	66.14	83.75
chr1	8405214	8406266	AT1G23770_	.	-	16.59	21.01
chr5	9601443	9601589	AT5G27247_	.	-	19.77	25.04
chr2	9528910	9529917	AT2G22440_	.	+	14.14	17.91
chr2	2256970	2257908	AT2G05900_SDG11,SUVH10	.	+	12.86	16.29
chr3	6027994	6028633	AT3G17626_	.	+	89.1	112.85
chr4	2113404	2116693	AT4G04320_	.	+	46.81	59.29
chr3	16305322	16306378	AT3G44760_	.	+	9.93	12.58
chr1	25011008	25012987	AT1G67020_	.	-	11.39	14.43
chr5	25891506	25893888	AT5G64750_ABR1	.	+	14.39	18.23
chr3	20251841	20254199	AT3G54710_ATCDT1B,CDT1,CDT1B	.	+	26.05	33
chr1	27880528	27883626	AT1G74150_	.	+	14.01	17.75
chr3	22892466	22893269	AT3G61840_	.	+	20.72	26.25
chr5	3872651	3873196	AT5G11990_	.	-	18.98	24.05
chr5	4102135	4105327	AT5G12970_	.	+	13.47	17.07
chr1	10099827	10099898	AT1G28880_	.	+	30.73	38.94
chr4	15248456	15252837	AT4G31430_	.	+	48.62	61.61
chr4	2497644	2505535	AT4G04920_AtSFR6,IEN1,MED16,SFR6,YID1	.	+	47.3	59.94
chr4	16494205	16495842	AT4G34520_FAE1,KCS18	.	+	14.62	18.53
chr4	8770185	8771899	AT4G15360_CYP705A3	.	+	9.34	11.84
chr1	11232333	11237530	AT1G31360_ATRECQ2,MED34,RECQL2	.	+	43.59	55.25
chr3	19677993	19678741	AT3G53080_	.	+	16.48	20.89
chr5	5115300	5121840	AT5G15700_	.	-	41	51.97
chr2	19324233	19326397	AT2G47030_VGDH1	.	-	15.99	20.27
chr5	20351160	20354436	AT5G50020_	.	+	49.44	62.67
chr3	9380234	9381405	AT3G25720_	.	+	9.82	12.45
chr1	6738484	6739734	AT1G19460_	.	+	11.09	14.06
chr1	20304567	20307024	AT1G54390_ING2	.	-	61.17	77.54
chr1	5602873	5604663	AT1G16390_ATOCT3,OCT3	.	+	14.64	18.56
chr1	18329696	18331869	AT1G49520_	.	+	60.07	76.15
chr4	17494705	17497124	AT4G37160_sks15	.	-	14.3	18.13
chr4	10828153	10828536	AT4G19980_	.	-	19.53	24.76
chr1	11370659	11372077	AT1G31750_	.	-	14.11	17.89
chr3	15839123	15840759	AT3G44090_	.	+	10.56	13.39
chr5	24268011	24269982	AT5G60310_LecRK-I.10	.	+	9.85	12.49
chr3	983121	983751	AT3G03850_SAUR26	.	+	12.24	15.52
chr1	871874	872906	AT1G03490_ANAC006,NAC006	.	+	18.25	23.14
chr1	5238065	5240051	AT1G15215_DTF1,SHH1	.	+	67.31	85.34
chr5	26479793	26481334	AT5G66300_ANAC105,NAC105,VND3	.	-	18.47	23.42
chr2	18644084	18646447	AT2G45220_PME17	.	-	15.37	19.49
chr1	7678208	7679697	AT1G21870_GONST5	.	+	10.74	13.62
chr4	7075826	7076680	AT4G11745_	.	-	10.59	13.43
chr4	10888262	10889597	AT4G20150_	.	-	82.55	104.67
chr1	30221780	30222702	AT1G80390_IAA15	.	-	14.88	18.87
chr2	13212150	13212752	AT2G31050_	.	+	19.84	25.16
chr3	4559908	4561020	AT3G13850_LBD22	.	+	17.15	21.75
chr1	5668384	5670708	AT1G16560_	.	+	51.32	65.08
chr1	5023656	5025955	AT1G14640_	.	+	37.59	47.67
chr5	18806563	18808224	AT5G46360_ATKCO3,KCO3	.	-	11.74	14.89
chr5	1484177	1486065	AT5G05030_	.	-	10.84	13.75
chr5	20009741	20011099	AT5G49350_	.	-	10.8	13.7
chr1	19642490	19645134	AT1G52730_	.	+	62.46	79.22
chr1	9693008	9696412	AT1G27840_ATCSA-1	.	-	55.34	70.19
chr2	9162620	9168452	AT2G21410_VHA-A2	.	+	52.94	67.15
chr1	4561068	4563061	AT1G13310_	.	-	10.87	13.79
chr2	1213233	1213650	AT2G03932_	.	+	13.18	16.72
chr5	20646680	20648725	AT5G50770_AtHSD6,HSD6	.	-	11.5	14.59
chr5	19915872	19917525	AT5G49130_	.	+	20.55	26.07
chr1	17986358	17988991	AT1G48640_	.	+	10.08	12.79
chr3	11917230	11919546	AT3G30290_CYP702A8	.	-	10.34	13.12
chr3	5258876	5259082	AT3G15534_	.	+	21.28	27
chr2	17347304	17355084	AT2G41620_	.	-	32.22	40.88
chr3	1326227	1329364	AT3G04830_	.	+	71.52	90.74
chr3	3467754	3470095	AT3G11070_	.	+	84.98	107.82
chr1	20653820	20665095	AT1G55350_ATDEK1,DEK1,EMB1275,EMB80	.	-	61.44	77.96
chr5	7334378	7336814	AT5G22120_	.	-	58.29	73.97
chr4	11704003	11706042	AT4G22090_	.	-	12.89	16.36
chr3	18779723	18780412	AT3G50610_	.	-	15.75	19.99
chr5	7372233	7373102	AT5G22270_	.	-	12.51	15.88
chr2	11720484	11720888	AT2G27390_	.	-	17.67	22.43
chr4	17444309	17445615	AT4G37010_CEN2	.	+	14.29	18.14
chr1	9529141	9531375	AT1G27440_ATGUT1,GUT2,IRX10	.	-	55.32	70.22
chr3	999467	1002484	AT3G03890_	.	-	48.62	61.72
chr1	9290870	9291282	AT1G26815_	.	-	12.35	15.68
chr2	11692884	11694916	AT2G27320_	.	+	8.6	10.92
chr5	25459087	25460436	AT5G63595_ATFLS4,FLS4	.	-	12.83	16.29
chr3	1841171	1843093	AT3G06100_NIP7;1,NLM6,NLM8	.	-	12.57	15.96
chr2	3704577	3705594	AT2G09840_	.	-	7.82	9.93
chr1	19606335	19608639	AT1G52630_	.	-	54.31	68.95
chr5	12602468	12604764	AT5G33370_	.	-	10.6	13.46
[truncated: 3,884 more rows]

## Sheet: a5.bed
chr	START	END	GENE	NA	strand	H3K36me3 signal in WT	H3K36me3 signal in Sdg8 KO
[truncated: 5,000 more rows]
